# Supplementary material for: Analysis of ceRNA network of differentially expressed genes in FaDu cell line and a cisplatin-resistant line derived from it
Source: PeerJ. 2021 Jul 1;9:e11645. doi: 10.7717/peerj.11645 (PMC8255068; doi:10.7717/peerj.11645)
Supplement: Supplemental Information 7 [file peerj-09-11645-s007.xlsx]

## Sheet: Sheet1
Concentration(μM)	inhibition of FaDu cells			inhibition of FaDu/DDP4 cells
	1	2	3	1	2	3
0	0	0	0	0	0	0
0.83	25	19.2982	19.6429	3.79747	5.12821	2.85714
2.5	56.25	56.1403	57.1429	15.1899	14.1026	8.57143
5	92.1875	100	100	31.6456	53.8462	54.2857
