# Supplementary material for: Analysis of ceRNA network of differentially expressed genes in FaDu cell line and a cisplatin-resistant line derived from it
Source: PeerJ. 2021 Jul 1;9:e11645. doi: 10.7717/peerj.11645 (PMC8255068; doi:10.7717/peerj.11645)
Supplement: Supplemental Information 8 [file peerj-09-11645-s008.xlsx]

## Sheet: Sheet1
Observed Gene	Cp				Reference Gene	Cp
FaDu-miR-6840-3p	30.64	30.81	31.02		FaDu-U6	21.91	21.99	22.07
DDP-miR-6840-3p	30.57	30.83	30.95		DDP-U6	22.37	22.53	22.56
FaDu-6808-5p	24.31	24.49	24.7		FaDu-U6	21.91	21.99	22.07
DDP-6808-5p	23.94	23.96	23.98		DDP-U6	22.37	22.53	22.56
FaDu-5006-5p	26.15	26.24	26.29		FaDu-U6	21.91	21.99	22.07
DDP-5006-5p	25.72	25.86	25.95		DDP-U6	22.37	22.53	22.56
FaDu-7150	25.19	25.52	25.56		FaDu-U6	21.91	21.99	22.07
DDP-7150	25.22	25.37	25.5		DDP-U6	22.37	22.53	22.56
FaDu-34a-5p	26.22	26.26	26.26		FaDu-U6	21.91	21.99	22.07
DDP-34a-5p	26.06	26.16	26.17		DDP-U6	22.37	22.53	22.56
FaDu-892b	30.13	30.47	30.63		FaDu-U6	21.91	21.99	22.07
DDP-892b	30.34	30.64	30.68		DDP-U6	22.37	22.53	22.56
FaDu-1229-5p	25.8	25.86	25.93		FaDu-U6	21.91	21.99	22.07
DDP-1229-5p	25.67	25.73	25.78		DDP-U6	22.37	22.53	22.56
FaDu-miR-197-5p	27.47	27.62	27.76		FaDu-U6	21.91	21.99	22.07
DDP-miR-197-5p	28.56	28.85	29		DDP-U6	22.37	22.53	22.56
FaDu-APOE	30.47	31.08	31.19		FaDu-GAPDH	18.11	19.27	19.4
DDP-APOE	31.23	32.29	32.33		DDP-GAPDH	18.47	18.47	18.76
FaDu-ARHGAP18	31.35	31.7	31.94		FaDu-ACTB	14.52	14.64	14.95
DDP-ARHGAP18	30.47	30.86	31.72		DDP-ACTB	15.81	16.14	16.77
FaDu-CYP24A1	32.29	32.46	32.63		FaDu-ACTB	16.86	16.9	16.9
DDP-CYP24A1	31.01	31.06	32		DDP-ACTB	17.84	17.86	17.96
FaDu-MMP1	28.11	28.18	28.24		FaDu-ACTB	16.86	16.9	16.9
DDP-MMP1	25.83	25.85	25.92		DDP-ACTB	17.84	17.86	17.96
FaDu-S100A9	26.92	26.93	27.03		FaDu-ACTB	16.86	16.9	16.9
DDP-S100A9	23.55	23.67	23.76		DDP-ACTB	17.84	17.86	17.96
FaDu-APPBP2	32.24	32.3	32.58		FaDu-ACTB	16.86	16.9	16.9
DDP-APPBP2	32.01	32.11	32.69		DDP-ACTB	17.84	17.86	17.96
