# Supplementary material for: Analysis of ceRNA network of differentially expressed genes in FaDu cell line and a cisplatin-resistant line derived from it
Source: PeerJ. 2021 Jul 1;9:e11645. doi: 10.7717/peerj.11645 (PMC8255068; doi:10.7717/peerj.11645)
Supplement: Supplemental Information 9 [file peerj-09-11645-s009.xlsx]

## Sheet: DE_circRNA
Fold-Change cut-off: 2.0
compare: FaduDDP4_VS_Fadu_fc2
foldchange:the ratio ( not logarithm) of normalized intensities between two conditions ; Formula : foldchange=average(power(2,signal(CASE)))/average(power(2,signal(CONTROL))).
foldchange (abs):the absolute ratio (not logarithm) of normalized intensities between two conditions ; Formula : if foldchange>1,foldchange(abs)=foldchange,foldchange<1,foldchange(abs)=1/foldchange.
Probe ID	Normalized signal (log2) of FaduDDP4	Detection of FaduDDP4	Normalized signal (log2) of Fadu_fc2	Detection of Fadu_fc2	Fold Change			Annotation
ProbeName	FaduDDP4_NS	FaduDDP4_flags	Fadu_NS	Fadu_flags	foldchange	foldchange(abs)	Regulation	Type	ProbeSeq	Accession	Source	Chromosome	Strand	Start	End	GeneSymbol	Gene_ID	Description	GO	Relation	Associated_gene	Associated_gene_description	circRNA_ID	circ_chrom	Hsa_hg19_circRNA_start	Hsa_hg19_circRNA_end	Hsa_hg19_circRNA_strand	genomic_length	spliced_seq_length	best_transcript	hostgene
hsa_circ_0088327	4.3639	P	2.74442	A	3.07265	3.07265	up	circRNA	TGACAGAAGATTAGAACAATCAGCCCTTCAAGCAGAACTTGAGAAGGAAAGGCAAGCCCT	NA	circbase	NA	NA	NA	NA	NA	NA	NA	NA	NA	NA	NA	hsa_circ_0088327	chr9	123900822	123920158	+	19336	2435	NM_007018	CNTRL
hsa_circ_0045030	3.525	P	2.50582	A	2.02677	2.02677	up	circRNA	AATTATTACACGCATAAACTTGGAGGAGGCAGTGGAGAGAGCATCCTGGTATCACAGCTT	NA	circbase	NA	NA	NA	NA	NA	NA	NA	NA	NA	NA	NA	hsa_circ_0045030	chr17	59945193	60002460	-	57267	3128	NR_026641	INTS2
hsa_circ_0028284	3.93758	P	2.63927	A	2.45941	2.45941	up	circRNA	AGTTTTCCCGTGCTGAGAGACTGCTCTTCCGGACGCAATTTTGAGGAGGTCGGAGCGGAA	NA	circbase	NA	NA	NA	NA	NA	NA	NA	NA	NA	NA	NA	hsa_circ_0028284	chr12	112123856	112171872	+	48016	1833	NM_001136538	ACAD10
hsa_circ_0077984	3.47076	P	1.83027	A	3.11772	3.11772	up	circRNA	CAAGTTCTAGATGTGCACTGGGAACTACACCTTTGTTCCTTACATGATAACTCCACATAA	NA	circbase	NA	NA	NA	NA	NA	NA	NA	NA	NA	NA	NA	hsa_circ_0077984	chr6	137019626	137019820	-	194	194	NM_005923	MAP3K5
hsa_circ_0003380	2.21001	A	3.85724	P	0.319252	3.13232	down	circRNA	GATGGACCAGGGCCGCTTGAAGATGCCATTGAAGATGAGGAAGAAGAATGTCCATCAGAG	NA	circbase	NA	NA	NA	NA	NA	NA	NA	NA	NA	NA	NA	hsa_circ_0003380	chr8	106431371	106456609	+	25238	261	NM_012082	ZFPM2
hsa_circ_0012009	3.75626	P	4.80502	P	0.483383	2.06875	down	circRNA	AGAAGCAGACAGACGTGATCTGGAAGAGCAACGCCCACCTGCTTCCAGACAAGGTCACAC	NA	circbase	NA	NA	NA	NA	NA	NA	NA	NA	NA	NA	NA	hsa_circ_0012009	chr1	43770903	43771014	+	111	111	NM_005424	TIE1
hsa_circ_0013883	9.96263	P	6.38631	P	11.9284	11.9284	up	circRNA	TTCCTTACTGGTGATGAGATTTCCATCCATGCTGACTTTGAGAATACATGTTCCCGAATT	NA	circbase	NA	NA	NA	NA	NA	NA	NA	NA	NA	NA	NA	hsa_circ_0013883	chr1	145440268	145440525	+	257	257	NM_006472	TXNIP
hsa_circ_0028477	6.76534	P	4.82448	P	3.83935	3.83935	up	circRNA	GAAGTGGAAGGTCCACGCCACCCTGGAGCTGTTTGCCCTGATGGTGGTAGTGTTTGAACT	NA	circbase	NA	NA	NA	NA	NA	NA	NA	NA	NA	NA	NA	hsa_circ_0028477	chr12	113705647	113716042	+	10395	819	NM_001143819	TPCN1
hsa_circ_0074973	5.19727	P	4.1957	P	2.00218	2.00218	up	circRNA	TCTCTTCACTGAGAGGTGATTCCTACTTCAGCCCCTTGGTGTGAGCAGCTTCTCAACATG	NA	circbase	NA	NA	NA	NA	NA	NA	NA	NA	NA	NA	NA	hsa_circ_0074973	chr5	170215577	170215672	+	95	95	NM_014211	GABRP
hsa_circ_0014517	6.50015	P	4.10866	P	5.24702	5.24702	up	circRNA	TTTAAATAAAAAGAAAGTGGAACTGGAACTGACATGGGTTAGAGGTATCACGTGGGGGCA	NA	circbase	NA	NA	NA	NA	NA	NA	NA	NA	NA	NA	NA	hsa_circ_0014517	chr1	155225769	155232176	-	6407	1572	NM_005698	SCAMP3
hsa_circ_0074842	4.71056	P	3.52381	A	2.27639	2.27639	up	circRNA	CTTTAACAGAGTGTGGACACTCCTAGGATAGAAAGTTTGGTATGTTGCTATACCTTTGCT	NA	circbase	NA	NA	NA	NA	NA	NA	NA	NA	NA	NA	NA	hsa_circ_0074842	chr5	159849214	159855746	+	6532	772	NM_004219	PTTG1
hsa_circ_0085049	3.47291	P	2.23234	A	2.36292	2.36292	up	circRNA	TTCTATAGGATTTTATTGCACAAAGGCAACGGTGACTTTCAAAGGCGCGGTACAGGAGCA	NA	circbase	NA	NA	NA	NA	NA	NA	NA	NA	NA	NA	NA	hsa_circ_0085049	chr8	100025493	100133673	+	108180	1317	NM_017890	VPS13B
hsa_circ_0029490	2.42243	A	3.83183	P	0.376467	2.65628	down	circRNA	ACTTTGTTTTTATTTGTATTTCATACTGAAGTTTCGTTCCGTTACTGTTCCGGGCCCTGG	NA	circbase	NA	NA	NA	NA	NA	NA	NA	NA	NA	NA	NA	hsa_circ_0029490	chr12	133200347	133220146	-	19799	3506	NM_006231	POLE
hsa_circ_0001684	6.07076	P	4.96311	P	2.15494	2.15494	up	circRNA	GGCAGGATATGAGTTAATAGAGTGGATACAACCTTGCTGAAGATGAAGAATATACAATAT	NA	circbase	NA	NA	NA	NA	NA	NA	NA	NA	NA	NA	NA	hsa_circ_0001684	chr7	23650789	23651172	+	383	383	NM_138771	CCDC126
hsa_circ_0059279	4.38356	P	3.29153	A	2.13173	2.13173	up	circRNA	ATGGAGCACAGATGGATGGTGTATCGCCAAATCATGGACAGCTCTGAATGTTTTCATGCT	NA	circbase	NA	NA	NA	NA	NA	NA	NA	NA	NA	NA	NA	hsa_circ_0059279	chr20	3262286	3268436	-	6150	285	NM_001009984	C20orf194
hsa_circ_0069275	1.1445	A	8.15519	M	0.00775486	128.951	down	circRNA	CCAAGACTTCCCAAGATTATCAGCATATGCTACTTTGATTGAAAATGATTCAAATCCAGA	NA	circbase	NA	NA	NA	NA	NA	NA	NA	NA	NA	NA	NA	hsa_circ_0069275	chr4	17816475	17839424	+	22949	1922	NM_022346	NCAPG
hsa_circ_0046729	5.99463	P	4.95056	P	2.06204	2.06204	up	circRNA	CAGGAAGACCACTACCATCTAAAGCAATTAAGTTTTCTGTTAAAGCTTCAAGTGGAAATA	NA	circbase	NA	NA	NA	NA	NA	NA	NA	NA	NA	NA	NA	hsa_circ_0046729	chr18	2718155	2718432	+	277	198	NM_015295	SMCHD1
hsa_circ_0067996	2.99311	A	4.00511	P	0.495859	2.0167	down	circRNA	AGAATCTGAGTACAAACAGAAATTATACCATTTTATGGAATGTCAACCTACATCACCCGA	NA	circbase	NA	NA	NA	NA	NA	NA	NA	NA	NA	NA	NA	hsa_circ_0067996	chr3	171969049	172098883	+	129834	2795	NM_022763	FNDC3B
hsa_circ_0001959	3.34343	P	1.64487	A	3.24577	3.24577	up	circRNA	AGCTGCTGAGATGCCTTTCAAAGAAGGGAAAAACTAGCCAAACTGAGAAGACATGTGCAG	NA	circbase	NA	NA	NA	NA	NA	NA	NA	NA	NA	NA	NA	hsa_circ_0001959	chr3	11396894	11468400	+	71506	3792	NM_006395	ATG7
hsa_circ_0082823	1.68515	A	4.45542	P	0.146578	6.82232	down	circRNA	GCTCCAACCACTTTTTGCCTGAATTCATCAATGGAGACTTTGATTCTATTAGGCCTGAAG	NA	circbase	NA	NA	NA	NA	NA	NA	NA	NA	NA	NA	NA	hsa_circ_0082823	chr7	144288515	144345972	-	57457	316	NM_022445	TPK1
hsa_circ_0065558	3.07989	A	4.87637	P	0.287876	3.47372	down	circRNA	CATGTCAATAAAGAACAGCTAAATTCTCCTAGAGTGGGAGTGACTGTGGCACAAACCACA	NA	circbase	NA	NA	NA	NA	NA	NA	NA	NA	NA	NA	NA	hsa_circ_0065558	chr3	49133364	49136686	-	3322	811	NM_005051	QARS
hsa_circ_0084022	4.50397	P	3.48317	A	2.02905	2.02905	up	circRNA	CATCAGCCAGGTGAGCATAGCTACCCCAAAACAGAAACCAAAAACTCCATTTTGCTTTGT	NA	circbase	NA	NA	NA	NA	NA	NA	NA	NA	NA	NA	NA	hsa_circ_0084022	chr8	38801306	38808508	+	7202	288	NM_021623	PLEKHA2
hsa_circ_0077609	3.88474	P	2.87159	A	2.01832	2.01832	up	circRNA	GACTTTTGCCAACAAGAAGAAGGTTTTGTCAGGTTCTTAGAAGGCTATTATATTGTGTTA	NA	circbase	NA	NA	NA	NA	NA	NA	NA	NA	NA	NA	NA	hsa_circ_0077609	chr6	110048311	110098263	+	49952	1600	NM_014845	FIG4
hsa_circ_0047141	3.78347	P	1.17579	A	6.09523	6.09523	up	circRNA	TGAATGCTCTGGTAGTGACCTGGGAGACTTTATGGACTATGACCCAAATCTCTTGGATGA	NA	circbase	NA	NA	NA	NA	NA	NA	NA	NA	NA	NA	NA	hsa_circ_0047141	chr18	20817105	20840434	+	23329	3663	NM_001100619	CABLES1
hsa_circ_0017595	2.50805	A	3.5143	P	0.497838	2.00868	down	circRNA	TCATTGGAAAACATTTTGACTTTGGCTGGGTGAGACGGTTTAAGCGGAAGCATCTTACTG	NA	circbase	NA	NA	NA	NA	NA	NA	NA	NA	NA	NA	NA	hsa_circ_0017595	chr10	5944982	5969504	+	24522	2828	NM_032807	FBXO18
hsa_circ_0074594	1.19123	A	3.82257	P	0.161394	6.196	down	circRNA	AGATGCCCAGGACTTAATGACTGACCTGAAGTCTGAGATCTCTGGAGACCTGGCAAGGCT	NA	circbase	NA	NA	NA	NA	NA	NA	NA	NA	NA	NA	NA	hsa_circ_0074594	chr5	150496687	150501821	-	5134	339	NM_001155	ANXA6
hsa_circ_0000772	4.70204	P	7.50195	P	0.143596	6.96396	down	circRNA	TCAATGTCTTCTTCATGGCTCAGCCCAAGGATGGCATGTTGAAAACTCAAAACTAACCCT	NA	circbase	NA	NA	NA	NA	NA	NA	NA	NA	NA	NA	NA	hsa_circ_0000772	chr17	41854902	41855024	-	122	122	NM_004090	DUSP3
hsa_circ_0065888	2.3895	A	3.89411	P	0.352425	2.83748	down	circRNA	ATCACCCAGCTCAAGGAGCTTATGCAGGAGCAGGGCGAGTATGTGTCCTGCCTTCTCTCA	NA	circbase	NA	NA	NA	NA	NA	NA	NA	NA	NA	NA	NA	hsa_circ_0065888	chr3	51317536	51395272	+	77736	1944	NM_004947	DOCK3
hsa_circ_0085442	1.63443	A	3.60288	P	0.255527	3.91348	down	circRNA	CCAGAGCCAGAAAACTCAGAAGAATTATAGTGAACATTATTCACAACACTTCCGATTACC	NA	circbase	NA	NA	NA	NA	NA	NA	NA	NA	NA	NA	NA	hsa_circ_0085442	chr8	124089350	124153141	+	63791	2563	NM_145647	WDR67
hsa_circ_0007850	3.99822	P	2.07129	A	3.80244	3.80244	up	circRNA	CCAATGCAGAAAAGAAGGGGAAATTATCAGTTCATTGCCTAGCATAGTAAATGACAAATA	NA	circbase	NA	NA	NA	NA	NA	NA	NA	NA	NA	NA	NA	hsa_circ_0007850	chr9	2804256	2812362	-	8106	752	NM_014878	KIAA0020
hsa_circ_0023825	3.13787	A	4.37782	P	0.423389	2.36189	down	circRNA	TAGAAGGATCTTCCCCTCTGGAAATGTCACCAACATCCTAGAGCTGAGTTTGACTTTGTG	NA	circbase	NA	NA	NA	NA	NA	NA	NA	NA	NA	NA	NA	hsa_circ_0023825	chr11	78433712	78565359	-	131647	2330	NM_001098816	ODZ4
hsa_circ_0036456	9.44535	P	11.3871	M	0.260308	3.84161	down	circRNA	ATATTGCAACTGGAAAACTTCTGCATACCCTGGAAGTGGATGCCTGGACTTTGGCCTTTT	NA	circbase	NA	NA	NA	NA	NA	NA	NA	NA	NA	NA	NA	hsa_circ_0036456	chr15	78581960	78582441	-	481	243	NM_025234	WDR61
hsa_circ_0010794	3.70226	P	5.56612	P	0.274741	3.63979	down	circRNA	GCCTGTGTGGTGGGACTCCATCAACGAGGTGGACGAGTCCTTCCAGCCCATCCACACGTA	NA	circbase	NA	NA	NA	NA	NA	NA	NA	NA	NA	NA	NA	hsa_circ_0010794	chr1	22902709	22903373	+	664	664	NM_020526	EPHA8
hsa_circ_0029964	4.67221	P	3.50462	A	2.24636	2.24636	up	circRNA	CTGATCTTGTAAGGAGCCTTGCTTCCTGTTTTACATCACAAATCTAAAAAAGGACCCCCC	NA	circbase	NA	NA	NA	NA	NA	NA	NA	NA	NA	NA	NA	hsa_circ_0029964	chr13	33306237	33338732	+	32495	1501	NM_015032	PDS5B
hsa_circ_0055455	6.67558	P	10.6153	M	0.0651647	15.3457	down	circRNA	GTGGTGCCAGATGCTGAGGATGTGGTATGAGTTGGATGAGGAAAGCCGAAGGAAATACCA	NA	circbase	NA	NA	NA	NA	NA	NA	NA	NA	NA	NA	NA	hsa_circ_0055455	chr2	86258452	86269226	-	10774	1221	NM_015425	POLR1A
hsa_circ_0056578	6.52391	P	8.19752	M	0.313468	3.19012	down	circRNA	TTCAAGGAGTGGTCATCCCCTATACTTCAGTGCCAACATATCAGATGCCAGCCTGTTATT	NA	circbase	NA	NA	NA	NA	NA	NA	NA	NA	NA	NA	NA	hsa_circ_0056578	chr2	136418839	136433056	+	14217	279	NM_015361	R3HDM1
hsa_circ_0000023	6.20329	P	4.24745	P	3.87942	3.87942	up	circRNA	CACCCAGGAACCAATTCTAACTATCAAATGAGAAAGATCAGTCTAAAGAAAAGGAGAAGA	NA	circbase	NA	NA	NA	NA	NA	NA	NA	NA	NA	NA	NA	hsa_circ_0000023	chr1	21076215	21100103	-	23888	791	NM_016287	HP1BP3
hsa_circ_0082477	3.85706	P	2.09794	A	3.38491	3.38491	up	circRNA	AACGTGTTGCAGTTCTGATCCGTTTCCATATCCAGAGGAATGTGATTGTCATCCCCAAGT	NA	circbase	NA	NA	NA	NA	NA	NA	NA	NA	NA	NA	NA	hsa_circ_0082477	chr7	134222945	134223769	+	824	167	NM_020299	AKR1B10
hsa_circ_0006564	1.16569	A	3.54132	P	0.192692	5.18962	down	circRNA	TTTTATCTCCAGCACCACTTTGATGAGCACTAGTGCTACAGCAACTGAGACAGCAACCAA	NA	circbase	NA	NA	NA	NA	NA	NA	NA	NA	NA	NA	NA	hsa_circ_0006564	chr11	35218292	35219793	+	1501	255	NM_000610	CD44
hsa_circ_0054624	4.37453	P	3.35031	A	2.03386	2.03386	up	circRNA	TTTTATTACCAGGTTAAAACGTTTGGACCTCTGGCCGCAGGAAATGGGACCAACCTTGAT	NA	circbase	NA	NA	NA	NA	NA	NA	NA	NA	NA	NA	NA	hsa_circ_0054624	chr2	55615913	55646052	-	30139	210	NM_001135597	CCDC88A
hsa_circ_0002894	2.57621	A	3.89373	P	0.401224	2.49238	down	circRNA	TTTGAACAGCCCGTAGCAGAACAAATAGAGCTTTATAGCAGGCCAAATCGACTCTTGTCT	NA	circbase	NA	NA	NA	NA	NA	NA	NA	NA	NA	NA	NA	hsa_circ_0002894	chr6	152570295	152577900	-	7605	600	NM_182961	SYNE1
hsa_circ_0083670	4.99398	P	6.30382	P	0.403365	2.47915	down	circRNA	TACAATACCAAAGTGTACAAGGCCCATCTGGTTAGACAATCTCCACTGTACTGGCAACGA	NA	circbase	NA	NA	NA	NA	NA	NA	NA	NA	NA	NA	NA	hsa_circ_0083670	chr8	23198504	23217778	-	19274	388	NM_002318	LOXL2
hsa_circ_0043957	3.96851	P	4.99098	P	0.492275	2.03139	down	circRNA	TAAATCCAGTCCTGCCAATGAGAAGAAACAGGAAACCAGTCTCAGTGTCCAACTCTCTAA	NA	circbase	NA	NA	NA	NA	NA	NA	NA	NA	NA	NA	NA	hsa_circ_0043957	chr17	41243116	41251897	-	8781	3990	NM_007300	BRCA1
hsa_circ_0018417	3.39443	P	1.18401	A	4.6281	4.6281	up	circRNA	ATTTAAGGTTATACATTTGATTGTGGGAAGGCAGCTGAACTCGGCGCCTGGAAAGATGGA	NA	circbase	NA	NA	NA	NA	NA	NA	NA	NA	NA	NA	NA	hsa_circ_0018417	chr10	58117198	58121034	-	3836	1851	NM_032997	ZWINT
hsa_circ_0078715	5.58113	P	3.30138	A	4.85596	4.85596	up	circRNA	TCAATCTGGTCTGCGCCACCAACGCCACCTACCACTGCATCAAGATGGCTGTTTATCCAA	NA	circbase	NA	NA	NA	NA	NA	NA	NA	NA	NA	NA	NA	hsa_circ_0078715	chr6	169632074	169633112	-	1038	500	NM_003247	THBS2
hsa_circ_0067703	8.30491	P	4.01678	P	19.5369	19.5369	up	circRNA	CAAAATTACAGGAATTAGCAGCAAAAGTGGTTCAGATGTTTTATGTGGCTGAGCCAAAGC	NA	circbase	NA	NA	NA	NA	NA	NA	NA	NA	NA	NA	NA	hsa_circ_0067703	chr3	148877832	148881736	+	3904	717	NM_032383	HPS3
hsa_circ_0015824	3.8788	P	2.74278	A	2.19774	2.19774	up	circRNA	CTAGAAGGAGAGTAATGGTAGTAACAGGGGTGAAGATGCCTTTTGTGATCCTGAAGATGA	NA	circbase	NA	NA	NA	NA	NA	NA	NA	NA	NA	NA	NA	hsa_circ_0015824	chr1	200544718	200544819	-	101	101	NM_014875	KIF14
hsa_circ_0040360	3.80599	P	2.63146	A	2.25719	2.25719	up	circRNA	CACTCTACAAAAAAACCATGCCACATGGATCGTTTGGATCGAATCCTATTGTCTGGCATC	NA	circbase	NA	NA	NA	NA	NA	NA	NA	NA	NA	NA	NA	hsa_circ_0040360	chr16	71715653	71724612	-	8959	472	NM_015020	PHLPP2
hsa_circ_0043874	3.19158	A	4.19898	P	0.497442	2.01029	down	circRNA	TACTGCGAACTGACGGGCTACAAGGGAGAGACCTGCCACACACATGTTCATCGGAGGTCT	NA	circbase	NA	NA	NA	NA	NA	NA	NA	NA	NA	NA	NA	hsa_circ_0043874	chr17	40838920	40841645	+	2725	835	NM_003632	CNTNAP1
hsa_circ_0065610	7.72011	P	5.47743	P	4.73276	4.73276	up	circRNA	AACCAAGGACCTGCGGGATCCGGCTGTGTGCCGCTGATGGAGCTGACCTCAAGGGAAAGA	NA	circbase	NA	NA	NA	NA	NA	NA	NA	NA	NA	NA	NA	hsa_circ_0065610	chr3	49167663	49170301	-	2638	1226	NM_002292	LAMB2
hsa_circ_0039276	4.57789	P	3.49361	P	2.12032	2.12032	up	circRNA	GAGCTGGCAGCCAAAAACTTTGGTCTCTTTTATTCAAAACCTTGTATTTTGTGTGGAAAG	NA	circbase	NA	NA	NA	NA	NA	NA	NA	NA	NA	NA	NA	hsa_circ_0039276	chr16	47581343	47697645	+	116302	1742	NM_001031835	PHKB
hsa_circ_0029985	4.1354	P	2.83337	A	2.46575	2.46575	up	circRNA	CAACTGTCTGTGGTACATGATCAGCATTGTCCACATTTACAATCGATGGAGGAACAGTGA	NA	circbase	NA	NA	NA	NA	NA	NA	NA	NA	NA	NA	NA	hsa_circ_0029985	chr13	35630146	35644989	+	14843	599	NM_015678	NBEA
hsa_circ_0019757	4.89108	P	5.94009	P	0.483298	2.06912	down	circRNA	CTGGTTACAAGGGCAGGCTCCTGCATGGACGGCACTTTACATATAAAAGTATCACAGGTG	NA	circbase	NA	NA	NA	NA	NA	NA	NA	NA	NA	NA	NA	hsa_circ_0019757	chr10	104377046	104377185	+	139	139	NM_016169	SUFU
hsa_circ_0007791	4.55925	P	6.45555	P	0.268631	3.72258	down	circRNA	CAGCAATATCTAACATTCCTGATGTAGATGAAGAAGGCTACAGTATTAAACCAGAAACAA	NA	circbase	NA	NA	NA	NA	NA	NA	NA	NA	NA	NA	NA	hsa_circ_0007791	chr5	72347175	72348334	+	1159	234	NM_138782	FCHO2
hsa_circ_0062733	3.18975	A	4.44194	P	0.419811	2.38202	down	circRNA	TGCGAGGAAGCTACAGAACTGTGGTGAGACCCACATACAAGGTGATGTACAAGATAGTGA	NA	circbase	NA	NA	NA	NA	NA	NA	NA	NA	NA	NA	NA	hsa_circ_0062733	chr22	29611515	29611619	+	104	104	NM_133455	EMID1
hsa_circ_0001509	3.60554	P	2.4259	A	2.2652	2.2652	up	circRNA	GAGGCATAATGAGGTACTAAAGAAAACTTAGAAGCTTCTAACTATATTACCCCCGTTAAT	NA	circbase	NA	NA	NA	NA	NA	NA	NA	NA	NA	NA	NA	hsa_circ_0001509	chr5	80908380	80948145	-	39765	5118	NM_012446	SSBP2
hsa_circ_0049403	3.26506	P	1.21675	A	4.13621	4.13621	up	circRNA	TGCGTCTTGCACTCAGCTCACCAGAGAGCTGGAAGAGCTCAAGGAGATTGAGGCGGATCT	NA	circbase	NA	NA	NA	NA	NA	NA	NA	NA	NA	NA	NA	hsa_circ_0049403	chr19	11257830	11258793	-	963	317	NM_182513	SPC24
hsa_circ_0041149	1.74009	A	4.84623	P	0.116133	8.6108	down	circRNA	TGAGCAAAGAGAGGCTGCAGACGGGCTGGTCCGTGCACACCTACCAGACGGAGAAGCAGA	NA	circbase	NA	NA	NA	NA	NA	NA	NA	NA	NA	NA	NA	hsa_circ_0041149	chr17	131558	171206	-	39648	361	NM_006987	RPH3AL
hsa_circ_0058912	2.81414	A	4.6437	P	0.28135	3.55429	down	circRNA	CCCAGCACGGGTTCATCTGCAGAAGCCAGCGGACGCCTCTGTTCAACTTGTGGGTTACCT	NA	circbase	NA	NA	NA	NA	NA	NA	NA	NA	NA	NA	NA	hsa_circ_0058912	chr2	240158288	240274613	-	116325	313	NM_006037	HDAC4
hsa_circ_0061999	3.55015	P	1.99827	A	2.932	2.932	up	circRNA	TTTACCGCAGAGTGGAGCCTTTCAGGCTGGCATGGAGAGCTTAAGGGGCAACTGAAGGAG	NA	circbase	NA	NA	NA	NA	NA	NA	NA	NA	NA	NA	NA	hsa_circ_0061999	chr21	46548316	46596579	+	48263	1300	NR_027673	ADARB1
hsa_circ_0043581	6.53562	P	5.38797	P	2.21553	2.21553	up	circRNA	TTTTGCATCTATTTTGTAGCCAATAAAACTCCGCACTAGCTCTGCAGCCATGTCCCAGGA	NA	circbase	NA	NA	NA	NA	NA	NA	NA	NA	NA	NA	NA	hsa_circ_0043581	chr17	39078951	39084612	-	5661	760	NM_015515	KRT23
hsa_circ_0091010	5.21094	P	1.10215	A	17.2531	17.2531	up	circRNA	AGAGTCGGTAGACATGACTGGGGGAAGCAGGACTTGACAGTCTGATCCGGACTGGTTCCA	NA	circbase	NA	NA	NA	NA	NA	NA	NA	NA	NA	NA	NA	hsa_circ_0091010	chrX	70523310	70523761	+	451	227	NM_012278	ITGB1BP2
hsa_circ_0021691	5.73318	P	3.6372	P	4.27515	4.27515	up	circRNA	ATAAACACTCATTAACAATGAGAGTCCCCTGGAAGCTGCACATCTGGATCGAGTCTCTGA	NA	circbase	NA	NA	NA	NA	NA	NA	NA	NA	NA	NA	NA	hsa_circ_0021691	chr11	34172533	34182628	-	10095	2260	NM_145804	ABTB2
hsa_circ_0056853	1.39654	A	5.36581	P	0.0638452	15.6629	down	circRNA	AAACGTGAATGGATATGCAAAATCCCAAGAGAGCACATGAGCAGTAAAACAGTGGAGGTG	NA	circbase	NA	NA	NA	NA	NA	NA	NA	NA	NA	NA	NA	hsa_circ_0056853	chr2	160833794	160885474	-	51680	1560	NM_007366	PLA2R1
hsa_circ_0018367	7.23404	P	8.59068	M	0.390492	2.56087	down	circRNA	GAGAAGTGGTTATATCGAACTCCTCTACAGGTCAAAGCTCAGATTCACAGTTGCATAAGC	NA	circbase	NA	NA	NA	NA	NA	NA	NA	NA	NA	NA	NA	hsa_circ_0018367	chr10	51580555	51586411	+	5856	1698	NM_001145260	NCOA4
hsa_circ_0070603	4.21576	P	5.26187	P	0.484273	2.06495	down	circRNA	GGAAAGCATGATTATCTTAGAAGACCTAGGACTCCAAAAATGTTTCCCCTGAAGGACGCT	NA	circbase	NA	NA	NA	NA	NA	NA	NA	NA	NA	NA	NA	hsa_circ_0070603	chr4	107229924	107230146	-	222	222	NM_001163435	TBCK
hsa_circ_0036519	2.4504	A	3.46622	P	0.494546	2.02206	down	circRNA	TCAATGACAGAGAGAATCATAGTGAAATCGAAAGGCGCAGACGGAACAAGATGACTCAGT	NA	circbase	NA	NA	NA	NA	NA	NA	NA	NA	NA	NA	NA	hsa_circ_0036519	chr15	80762558	80767564	+	5006	428	NM_014862	ARNT2
hsa_circ_0002525	3.2377	P	4.82096	P	0.333728	2.99646	down	circRNA	TGAGCTGCTGATTGCATTATTCATTTTCATATGCCTGCCTTTATCTGCTTTGGAAGCCTA	NA	circbase	NA	NA	NA	NA	NA	NA	NA	NA	NA	NA	NA	hsa_circ_0002525	chr4	106092971	106111662	+	18691	18691	NM_001127208	TET2
hsa_circ_0072405	7.63102	P	6.32138	P	2.4788	2.4788	up	circRNA	CAGTCCTTGAGGTCTGGAAATCAAAGCAGGTGCGAGCCCCTATGGTTAATCCAACATTAG	NA	circbase	NA	NA	NA	NA	NA	NA	NA	NA	NA	NA	NA	hsa_circ_0072405	chr5	43615949	43702838	+	86889	2730	NM_012343	NNT
hsa_circ_0063632	3.43646	P	1.1736	A	4.79942	4.79942	up	circRNA	TGAACAGTAACTGGGAGCCCATTGAGAAGTACATCAATGAGCAGTACGAGAAGTTCCTGA	NA	circbase	NA	NA	NA	NA	NA	NA	NA	NA	NA	NA	NA	hsa_circ_0063632	chr22	42383625	42394225	+	10600	4105	NM_019106	3-Sep
hsa_circ_0045380	3.32276	P	1.84711	A	2.78109	2.78109	up	circRNA	GCCCAAAGTGGTGATGCTTGCCGACAGGAAGGGCACAGAAGAACTGTATGCAATCAAAAT	NA	circbase	NA	NA	NA	NA	NA	NA	NA	NA	NA	NA	NA	hsa_circ_0045380	chr17	64731606	64785097	+	53491	798	NM_002737	PRKCA
hsa_circ_0009836	5.54927	P	7.10275	P	0.340686	2.93526	down	circRNA	CAGGATTCCTCTAGCCTCATAGGAGTGGAAGGTGGGAATGCCACCCGAATTGGCAGATTT	NA	circbase	NA	NA	NA	NA	NA	NA	NA	NA	NA	NA	NA	hsa_circ_0009836	chr1	11290981	11317222	-	26241	2508	NM_004958	MTOR
hsa_circ_0062608	3.5216	P	1.31005	A	4.63174	4.63174	up	circRNA	GTGGTGTCAGAAGAAAACAGAAGGCTATCAGAGCATCTGTTAAGAACATCTTCAGCCAGC	NA	circbase	NA	NA	NA	NA	NA	NA	NA	NA	NA	NA	NA	hsa_circ_0062608	chr22	24759228	24765288	+	6060	344	NM_015330	SPECC1L
hsa_circ_0003853	3.13426	A	5.04634	P	0.265711	3.76349	down	circRNA	CTATGAGCAGAGGAAACACAAGAATAGAAGAGGCTTGTGAAATGTATACCAGAGCTGCAA	NA	circbase	NA	NA	NA	NA	NA	NA	NA	NA	NA	NA	NA	hsa_circ_0003853	chr20	23370582	23383709	-	13127	463	NM_022080	NAPB
hsa_circ_0038653	1.53207	A	5.04161	P	0.0878058	11.3888	down	circRNA	CCAGACCATGTAAGAGATGCTAAAAACCTTGTACCTATGGACCCCAATGGCCTGTCAGAT	NA	circbase	NA	NA	NA	NA	NA	NA	NA	NA	NA	NA	NA	hsa_circ_0038653	chr16	24104111	24166178	+	62067	710	NM_002738	PRKCB
hsa_circ_0091462	3.41292	P	6.33835	P	0.131631	7.59698	down	circRNA	TGTACATAGATACCGACTTGTAAAAAAGGCAAAAAGGGCCCAGCAGAAAAGGGCAAAGGT	NA	circbase	NA	NA	NA	NA	NA	NA	NA	NA	NA	NA	NA	hsa_circ_0091462	chrX	123164810	123182928	+	18118	770	NM_001042749	STAG2
hsa_circ_0052946	1.08926	A	7.78272	M	0.00966197	103.499	down	circRNA	GTGGAACTATAAAAGTACTGGAAAAATTCACAAGGCTACTGTGGAGCCGATATCAAGGCC	NA	circbase	NA	NA	NA	NA	NA	NA	NA	NA	NA	NA	NA	hsa_circ_0052946	chr2	24029040	24046439	-	17399	4780	NM_017552	ATAD2B
hsa_circ_0040298	10.532	P	11.6711	P	0.454051	2.2024	down	circRNA	CCCTCCCAAGCACGGTGAGGAGGTGTCCCCCGCCGCCAGTGACCTGGCCATGGTGCTGAC	NA	circbase	NA	NA	NA	NA	NA	NA	NA	NA	NA	NA	NA	hsa_circ_0040298	chr16	70698500	70698666	-	166	166	NM_138383	MTSS1L
hsa_circ_0006584	4.30645	P	3.23392	A	2.10312	2.10312	up	circRNA	AGAACTTCAGGGAAACATGCAATTTTCATTGTGAGCTGCCTTCCAGAGTTTATGGTAGAA	NA	circbase	NA	NA	NA	NA	NA	NA	NA	NA	NA	NA	NA	hsa_circ_0006584	chr12	28457558	28460682	+	3124	1490	NM_018318	CCDC91
hsa_circ_0017567	5.09789	P	2.79147	A	4.94653	4.94653	up	circRNA	GGACAGTTTCCTCAGAAAAGAAAAAGAGACCGCAGGAACTAGATTTTAAATATGTAATGA	NA	circbase	NA	NA	NA	NA	NA	NA	NA	NA	NA	NA	NA	hsa_circ_0017567	chr10	5765639	5773166	+	7527	1058	NM_017782	FAM208B
hsa_circ_0051794	10.1491	P	12.5658	M	0.187284	5.33949	down	circRNA	CAACGTGCCTGCCACCCGGGACCTTGCCCAGTACGACGCAGCCCATCATGAAGAGTTCAA	NA	circbase	NA	NA	NA	NA	NA	NA	NA	NA	NA	NA	NA	hsa_circ_0051794	chr19	49416267	49416453	+	186	186	NM_006184	NUCB1
hsa_circ_0064990	3.99797	P	2.42925	A	2.96641	2.96641	up	circRNA	CATCTTATCGTCACTCTGAGAGGAGTGATACCAATGAAAAAAGGTCAGTTGATTCCAGTG	NA	circbase	NA	NA	NA	NA	NA	NA	NA	NA	NA	NA	NA	hsa_circ_0064990	chr3	42675071	42681242	+	6171	3273	NM_005385	NKTR
hsa_circ_0088144	5.79054	P	4.74305	P	2.06693	2.06693	up	circRNA	TCTTGGTTACTGTGTGGAACAGGGCCAGCCAGTCCAGGTCAGCTGAGGCTGTCCATTGAT	NA	circbase	NA	NA	NA	NA	NA	NA	NA	NA	NA	NA	NA	hsa_circ_0088144	chr9	116241770	116247973	+	6203	274	NM_144488	RGS3
hsa_circ_0082725	2.92691	A	6.12663	P	0.10884	9.18781	down	circRNA	ACTCACCAAGGCCGCGGGCGAGCCTGCGCTGGGCCGGCCGAGGGAAGCGCGCCGCTGGGG	NA	circbase	NA	NA	NA	NA	NA	NA	NA	NA	NA	NA	NA	hsa_circ_0082725	chr7	140285388	140340576	-	55188	39624	NM_015689	DENND2A
hsa_circ_0066227	1.39473	A	5.6048	P	0.054031	18.5079	down	circRNA	GAAGAGACTGAAATACATTGGAAACTGATTCCAATTACAGACCTGAGAAATTAGATGTTG	NA	circbase	NA	NA	NA	NA	NA	NA	NA	NA	NA	NA	NA	hsa_circ_0066227	chr3	56674013	56695045	-	21032	1604	NM_001112736	FAM208A
hsa_circ_0067303	3.08771	A	5.03806	P	0.258754	3.86468	down	circRNA	GTCGACCTTGACCACGTGACTGTTGAGATGTCTGTGAGGGTCAATGGGCGGAACATCGTC	NA	circbase	NA	NA	NA	NA	NA	NA	NA	NA	NA	NA	NA	hsa_circ_0067303	chr3	129281629	129303076	-	21447	2796	NM_015103	PLXND1
hsa_circ_0052450	4.63236	P	12.4967	M	0.00429148	233.02	down	circRNA	ATCGTCCAGGATACCTGCACTTTAATCAGATAGAAACTTTGGACCCAGATTCGTTCCAGC	NA	circbase	NA	NA	NA	NA	NA	NA	NA	NA	NA	NA	NA	hsa_circ_0052450	chr2	1669985	1687923	-	17938	875	NM_012293	PXDN
hsa_circ_0090154	3.56811	P	1.33326	A	4.70715	4.70715	up	circRNA	CATTAAAAAGTACTATGATGGAGATGAAGATGAAGAAATTGATGGAGATACCAATAAATA	NA	circbase	NA	NA	NA	NA	NA	NA	NA	NA	NA	NA	NA	hsa_circ_0090154	chrX	24761346	24861794	+	100448	1581	NM_016937	POLA1
hsa_circ_0013591	3.34705	P	5.3811	P	0.24417	4.09551	down	circRNA	TCAGTATGGGACATACTATGTTGAGAAACTTCTATGGAACTCCCAAGCCTCCAGCAGAAC	NA	circbase	NA	NA	NA	NA	NA	NA	NA	NA	NA	NA	NA	hsa_circ_0013591	chr1	114128008	114157280	+	29272	523	NM_152900	MAGI3
hsa_circ_0017708	3.48571	P	1.77213	A	3.27974	3.27974	up	circRNA	ATAAAACTAGGAGCAAATGATGAGAAAGAAGCAAGCAATGCATCTTGATGCGAGATACGT	NA	circbase	NA	NA	NA	NA	NA	NA	NA	NA	NA	NA	NA	hsa_circ_0017708	chr10	11994064	12001355	-	7291	850	NM_080599	UPF2
hsa_circ_0025801	3.31374	P	12.0562	M	0.00233489	428.286	down	circRNA	TGAAAAAGAGTTTTGTACCAATGGCTAGAAGCAGATCGTCATGGCAAGAGCCAAGGTGCT	NA	circbase	NA	NA	NA	NA	NA	NA	NA	NA	NA	NA	NA	hsa_circ_0025801	chr12	31545547	31652605	-	107058	6964	NM_144973	DENND5B
hsa_circ_0058756	5.21714	P	3.82036	P	2.63313	2.63313	up	circRNA	TCAACATAGCAGAATTAATGTAGGGAGCTAAATCCAGTCGGAGCGTGATGAATCCAGTGG	NA	circbase	NA	NA	NA	NA	NA	NA	NA	NA	NA	NA	NA	hsa_circ_0058756	chr2	234106740	234116549	+	9809	2072	NM_001017915	INPP5D
hsa_circ_0016736	6.09349	P	4.94052	P	2.22371	2.22371	up	circRNA	TTGTCAGCAAACTGTAGACTCCACTCCACTTTCAGTTCACACACCAACCTTAAGGAAAAA	NA	circbase	NA	NA	NA	NA	NA	NA	NA	NA	NA	NA	NA	hsa_circ_0016736	chr1	227192694	227235711	-	43017	1966	NM_003607	CDC42BPA
hsa_circ_0043580	5.21269	P	3.6864	P	2.88044	2.88044	up	circRNA	TTTTGTAGCCAATAAAACTCCGCACTAGCTGTCTGCAACTCCAAAGATCAAGGCCATAAC	NA	circbase	NA	NA	NA	NA	NA	NA	NA	NA	NA	NA	NA	hsa_circ_0043580	chr17	39078951	39079335	-	384	384	NM_015515	KRT23
hsa_circ_0057026	7.2517	P	10.5587	M	0.101038	9.89723	down	circRNA	ATACAGATACGCCTCAACAAATAACGAAAGCTCTAATCACAGTTTTGGAAGCTTGGGATC	NA	circbase	NA	NA	NA	NA	NA	NA	NA	NA	NA	NA	NA	hsa_circ_0057026	chr2	171863309	171939362	-	76053	1340	NM_012290	TLK1
hsa_circ_0082189	2.83009	A	4.16064	P	0.397617	2.51498	down	circRNA	GTGTCGGAAGCCCTGGAGGGAGAGAGAGCCAGAGAGCGGCCGAGCGCCTAGGAGGCCCGC	NA	circbase	NA	NA	NA	NA	NA	NA	NA	NA	NA	NA	NA	hsa_circ_0082189	chr7	128470482	128478857	+	8375	1620	NM_001458	FLNC
hsa_circ_0082724	4.55784	P	2.54852	A	4.02592	4.02592	up	circRNA	AAAGATACCCAAGATCCGCCAATGAAGGAGAACCCTTATGAGGACATCGAGTTACATGGT	NA	circbase	NA	NA	NA	NA	NA	NA	NA	NA	NA	NA	NA	hsa_circ_0082724	chr7	140273607	140285510	-	11903	323	NM_015689	DENND2A
hsa_circ_0065250	4.0397	P	1.80288	A	4.71357	4.71357	up	circRNA	TGGAAACTATCATGGACAGAGAGAAAGAAGCTATGAGCAGGATGAAGAAACAGTCACAGC	NA	circbase	NA	NA	NA	NA	NA	NA	NA	NA	NA	NA	NA	hsa_circ_0065250	chr3	47663696	47730914	-	67218	1556	NM_003074	SMARCC1
hsa_circ_0061663	4.33046	P	1.24528	A	8.48658	8.48658	up	circRNA	CATTGCATAGTGCTTTAGATGAATTCTTTGATATAATGGCAATTCACGTGCTTCTGAGAT	NA	circbase	NA	NA	NA	NA	NA	NA	NA	NA	NA	NA	NA	hsa_circ_0061663	chr21	38461098	38529208	+	68110	2654	NM_003316	TTC3
hsa_circ_0031989	4.27832	P	5.42893	P	0.450434	2.22008	down	circRNA	TTTGGAAAGGGAATCATTAACCAATGGCAACAGGAATCCAAGGATAAAGTGATTTCCCTC	NA	circbase	NA	NA	NA	NA	NA	NA	NA	NA	NA	NA	NA	hsa_circ_0031989	chr14	55168779	55218255	+	49476	980	NM_015589	SAMD4A
hsa_circ_0025789	3.50617	P	2.05246	A	2.73912	2.73912	up	circRNA	CCAGCAGGATGCCCAGAAGCCATGGCCCACTATAAGACTGAGCAGGACGACTGGCTGATC	NA	circbase	NA	NA	NA	NA	NA	NA	NA	NA	NA	NA	NA	hsa_circ_0025789	chr12	31106914	31132605	+	25691	467	NM_001080509	TSPAN11
hsa_circ_0005462	7.32578	P	6.3154	P	2.01443	2.01443	up	circRNA	TCAATCAAAGGTGCTATCAGTGCTAAAGCATTCATTGCTGTCCTTCAAGCAACCCAGAGT	NA	circbase	NA	NA	NA	NA	NA	NA	NA	NA	NA	NA	NA	hsa_circ_0005462	chr4	169157402	169158946	-	1544	369	NM_017631	DDX60
hsa_circ_0004389	8.01357	P	6.82135	P	2.28504	2.28504	up	circRNA	CAGGATTCGATGAGATTGAGCAAGATCTTACTCAGAGATTTGAAGAAAACTTATCTCAAA	NA	circbase	NA	NA	NA	NA	NA	NA	NA	NA	NA	NA	NA	hsa_circ_0004389	chr9	32480216	32481495	-	1279	294	NM_014314	DDX58
hsa_circ_0000778	3.05738	A	4.09364	P	0.487589	2.05091	down	circRNA	CACATTTCCAAAAGTCCAAGGAAGGTGACAAAGTACAATTTGAAGAATTTGCAAAAGTAG	NA	circbase	NA	NA	NA	NA	NA	NA	NA	NA	NA	NA	NA	hsa_circ_0000778	chr17	45479497	45492285	+	12788	549	NM_152347	C17orf57
hsa_circ_0053945	4.05886	P	1.13382	A	7.59497	7.59497	up	circRNA	TGTTAAGTTCTTGATGGCAAGATATGATGGGAATTGGGAAGATGAGGATGTTTTACTTTT	NA	circbase	NA	NA	NA	NA	NA	NA	NA	NA	NA	NA	NA	hsa_circ_0053945	chr2	33808728	33812473	-	3745	2235	NM_015475	FAM98A
hsa_circ_0051866	2.65511	A	3.67761	P	0.492264	2.03143	down	circRNA	AGCAGGTGGTGGAGAAGGTGGAGGCCTCTGAGCTTTTCCAGTTTTGGTCTGGAGGATCTG	NA	circbase	NA	NA	NA	NA	NA	NA	NA	NA	NA	NA	NA	hsa_circ_0051866	chr19	49846487	49858463	-	11976	609	NM_003598	TEAD2
hsa_circ_0017596	4.45923	P	5.69497	P	0.424623	2.35503	down	circRNA	TGCTGCCGGGGTCAGGGAAGTCAAAGATGCATCCCTGAGTTCTTCCTAGCAGGCAAGCAG	NA	circbase	NA	NA	NA	NA	NA	NA	NA	NA	NA	NA	NA	hsa_circ_0017596	chr10	5947999	5951257	+	3258	863	NM_032807	FBXO18
hsa_circ_0064878	6.03996	P	2.18724	A	14.4472	14.4472	up	circRNA	ATGAGACTGGAGGAAGGTGACATTGCGGACTCAGGGCGGTGTTCATGTGCACAAGGATGG	NA	circbase	NA	NA	NA	NA	NA	NA	NA	NA	NA	NA	NA	hsa_circ_0064878	chr3	38401829	38415993	+	14164	748	NM_005108	XYLB
hsa_circ_0059226	4.39977	P	3.32022	A	2.11338	2.11338	up	circRNA	ACTCACTGCTCACAGCTGCCCAGCTGAAAGCCAAGTTCAGAGGGCTGTGTACAAGGACCT	NA	circbase	NA	NA	NA	NA	NA	NA	NA	NA	NA	NA	NA	hsa_circ_0059226	chr20	2819837	2819917	-	80	80	NM_022760	FAM113A
hsa_circ_0071055	1.97156	A	3.67117	P	0.30787	3.24812	down	circRNA	ACATCCAATTCAGGTCATTGAGCTGCGACCCTTGTTCAACGCCGTTGGCGAAGCCAGCTG	NA	circbase	NA	NA	NA	NA	NA	NA	NA	NA	NA	NA	NA	hsa_circ_0071055	chr4	146002811	146019368	-	16557	304	NM_014885	ANAPC10
hsa_circ_0024107	5.24616	P	3.98706	P	2.39346	2.39346	up	circRNA	AAGTCAACCTTGTTTCTACTGTTTTATACACTTTCGACGTTCCCAAAATCCTGTCCAGCC	NA	circbase	NA	NA	NA	NA	NA	NA	NA	NA	NA	NA	NA	hsa_circ_0024107	chr11	102660640	102666022	-	5382	1131	NM_002421	MMP1
hsa_circ_0069334	3.71785	P	5.12642	P	0.376685	2.65474	down	circRNA	AGATCCATCACTTCCTCCTGAAAAAAGGAAACAGTACCTGGTGTGTAAGAGGAAGCTGGA	NA	circbase	NA	NA	NA	NA	NA	NA	NA	NA	NA	NA	NA	hsa_circ_0069334	chr4	24875302	24878319	-	3017	201	NM_173463	CCDC149
hsa_circ_0039567	5.87708	P	4.72554	P	2.22151	2.22151	up	circRNA	AGAGAAATTATTCTTTGCGTGTTTGGTGATGATCGCCTATGGAGTGAGTGCCTTCTTCAG	NA	circbase	NA	NA	NA	NA	NA	NA	NA	NA	NA	NA	NA	hsa_circ_0039567	chr16	57290008	57290941	-	933	933	NM_015993	PLLP
hsa_circ_0075838	2.26444	A	7.80165	P	0.0215345	46.4371	down	circRNA	AGGCTTCCAGGTATGTGCCAGTCAAAGATCTACTGGGAATTTATGAGAAACTGTATGGTC	NA	circbase	NA	NA	NA	NA	NA	NA	NA	NA	NA	NA	NA	hsa_circ_0075838	chr6	24454242	24467502	-	13260	790	NM_001503	GPLD1
hsa_circ_0004864	2.79636	A	4.00702	P	0.432073	2.31442	down	circRNA	TTCCTACATGGGACTTGAAGTTGGACGGAGGAAGACAATCAACTGGTGCAGTGAGTTTGA	NA	circbase	NA	NA	NA	NA	NA	NA	NA	NA	NA	NA	NA	hsa_circ_0004864	chr18	20814571	20817209	+	2638	358	NM_001100619	CABLES1
hsa_circ_0020967	3.41518	P	1.8732	A	2.91193	2.91193	up	circRNA	TTCAGTAATCACTCCTCGTTGTTTACCCCTGGACCCAGAGATTTTTTGACAGCTTTGGAA	NA	circbase	NA	NA	NA	NA	NA	NA	NA	NA	NA	NA	NA	hsa_circ_0020967	chr11	5289579	5290906	-	1327	471	NM_005330	HBE1
hsa_circ_0050330	5.14645	P	2.44058	A	6.52454	6.52454	up	circRNA	ATTTGCAACGAAACAAGATATTTTCCAACTCTGCAGCCAGTTGACTGCAAGGCCTCTGAG	NA	circbase	NA	NA	NA	NA	NA	NA	NA	NA	NA	NA	NA	hsa_circ_0050330	chr19	28957308	29215225	-	257917	705	TCONS_l2_00013371	TCONS_l2_00013371
hsa_circ_0045159	3.55328	P	5.84903	P	0.203662	4.91009	down	circRNA	TCCCCATCAGATGGACAGATGGTTCCATTATAAACTTCATCTCCTGGGCACCAGGCAAAC	NA	circbase	NA	NA	NA	NA	NA	NA	NA	NA	NA	NA	NA	hsa_circ_0045159	chr17	60759197	60769499	+	10302	1517	NM_006039	MRC2
hsa_circ_0035847	3.48417	P	1.84121	A	3.12306	3.12306	up	circRNA	GAAGGGAGAGGTAAGGTACACAGATTTGAGGCTATGGACAGCAACCCTGAGCTGGCCAGT	NA	circbase	NA	NA	NA	NA	NA	NA	NA	NA	NA	NA	NA	hsa_circ_0035847	chr15	65110455	65111422	-	967	195	NM_025049	PIF1
hsa_circ_0065239	2.19484	A	9.93442	M	0.00467902	213.72	down	circRNA	TCACCCAAATGTGTGATCCTCGTCTTGGGGGCAGACTCCGGGACGGGGCTTAGAGGTACC	NA	circbase	NA	NA	NA	NA	NA	NA	NA	NA	NA	NA	NA	hsa_circ_0065239	chr3	47610641	47619623	-	8982	1566	NM_001206942	CSPG5
hsa_circ_0070689	4.07106	P	2.12081	A	3.86444	3.86444	up	circRNA	TGACCCTAAGGCAATTTTATATGATGACAAAGGAGCATGTTTGGAGAGTCTGTTTCTTAA	NA	circbase	NA	NA	NA	NA	NA	NA	NA	NA	NA	NA	NA	hsa_circ_0070689	chr4	113527163	113545032	-	17869	2700	NM_018392	C4orf21
hsa_circ_0035269	2.6119	A	4.05531	P	0.367698	2.71962	down	circRNA	GAAGACTTGGTGACTCTGGAACTTCTTTACAGAATTACTAATGCACAGAATATAACAGTT	NA	circbase	NA	NA	NA	NA	NA	NA	NA	NA	NA	NA	NA	hsa_circ_0035269	chr15	51240216	51250991	+	10775	675	NM_001252127	AP4E1
hsa_circ_0079546	3.60397	P	5.12267	P	0.349	2.86533	down	circRNA	AGAACCCATACAGGTCAGCAGCAAGGACAAGATGGAGTAAAAGTCCAGCAAGCTACTATA	NA	circbase	NA	NA	NA	NA	NA	NA	NA	NA	NA	NA	NA	hsa_circ_0079546	chr7	21516696	21521741	+	5045	429	NM_003112	SP4
hsa_circ_0064339	4.27059	P	1.11246	A	8.92673	8.92673	up	circRNA	TTGCTGTCATTATTCTCAGTGGAGAAATGACCATGGTTGACACAGAGATGCCATTCTGGC	NA	circbase	NA	NA	NA	NA	NA	NA	NA	NA	NA	NA	NA	hsa_circ_0064339	chr3	12421202	12458653	+	37451	1188	NM_138711	PPARG
hsa_circ_0086212	5.49528	P	4.19026	P	2.47086	2.47086	up	circRNA	ATATCCAGTGGCCTAACGGAATTACACTTGGCAATATAACATGTAGTCCCGACGAGTTCA	NA	circbase	NA	NA	NA	NA	NA	NA	NA	NA	NA	NA	NA	hsa_circ_0086212	chr9	2643159	2647592	+	4433	1374	NM_003383	VLDLR
hsa_circ_0064766	5.56709	P	4.52115	P	2.06471	2.06471	up	circRNA	ACGGACTAAGTTATTGTAGCTTTAATAGACAGAATGGGAGATGCCAAAGACAAGGTTCGA	NA	circbase	NA	NA	NA	NA	NA	NA	NA	NA	NA	NA	NA	hsa_circ_0064766	chr3	33615964	33731424	-	115460	2207	NM_015097	CLASP2
hsa_circ_0020992	2.0305	A	3.93356	P	0.267376	3.74006	down	circRNA	TAATTTCACCCGAAGTTGCAGGCAGACGGAGCAGAGCGGTCAGGGATCATGAGGGAGAGT	NA	circbase	NA	NA	NA	NA	NA	NA	NA	NA	NA	NA	NA	hsa_circ_0020992	chr11	6340175	6341740	-	1565	1037	NM_145040	PRKCDBP
hsa_circ_0005487	2.53558	A	3.67701	P	0.453309	2.206	down	circRNA	TACAGTTCAGGTGTGCCATTTTTCACAGTGGAGCCAAAAGATCTGGCAGTGCCACCCAAT	NA	circbase	NA	NA	NA	NA	NA	NA	NA	NA	NA	NA	NA	hsa_circ_0005487	chr15	41854745	41857339	+	2594	374	NM_006293	TYRO3
hsa_circ_0004842	3.93301	P	2.74016	A	2.28605	2.28605	up	circRNA	CAGTATTACAAGTTTGAATTTTGGGAAGATTTTGAAGAAGACCATGGGAAGGGGAGAGAA	NA	circbase	NA	NA	NA	NA	NA	NA	NA	NA	NA	NA	NA	hsa_circ_0004842	chr15	93510554	93510743	+	189	189	NM_001271	CHD2
hsa_circ_0084053	3.60371	P	1.16122	A	5.43578	5.43578	up	circRNA	GGAATTCCCAAGTAGCGAGAACAAATATCCTATATTATTCCAATAGATGAGAAACTGTAC	NA	circbase	NA	NA	NA	NA	NA	NA	NA	NA	NA	NA	NA	hsa_circ_0084053	chr8	38994175	39114862	+	120687	2024	NM_145004	ADAM32
hsa_circ_0010481	2.5401	A	3.95681	P	0.374565	2.66976	down	circRNA	TCCTCCTCAGCAATCCCACAGAGTATTGATGAGGAAACTGAAGTTTGGAGCGATCACATC	NA	circbase	NA	NA	NA	NA	NA	NA	NA	NA	NA	NA	NA	hsa_circ_0010481	chr1	21295966	21437876	-	141910	911	NM_001198803	EIF4G3
hsa_circ_0085645	8.09383	P	9.37868	P	0.410413	2.43657	down	circRNA	TGTATTTATTTCCAGACCAATAAATTTGTAACTTTGCAGCGGCCGGCCAAGCTCGCTGAG	NA	circbase	NA	NA	NA	NA	NA	NA	NA	NA	NA	NA	NA	hsa_circ_0085645	chr8	134249413	134254317	-	4904	2001	NM_001135242	NDRG1
hsa_circ_0005654	3.28137	P	4.35144	P	0.476296	2.09954	down	circRNA	TCACACCAGGGAGATCCTAAGAAAAAGCTTATATGTTCAGTGTGCAATAAAAAGTGTTCT	NA	circbase	NA	NA	NA	NA	NA	NA	NA	NA	NA	NA	NA	hsa_circ_0005654	chr4	121675707	121732604	-	56897	758	NM_018699	PRDM5
hsa_circ_0057686	5.15214	P	3.62198	P	2.88817	2.88817	up	circRNA	GCCGGTGCAGGTCCCTGTGCGTTTTATTGCGACCTGCCGGTGGGAACTTTGTCTCCGAGT	NA	circbase	NA	NA	NA	NA	NA	NA	NA	NA	NA	NA	NA	hsa_circ_0057686	chr2	200173482	200320819	-	147337	1799	NM_001172509	SATB2
hsa_circ_0002419	5.41119	P	2.429	A	7.90185	7.90185	up	circRNA	TTCACGATGTGACAGTGGATGCAGACAGGTGAAGACCCTGAAACAAGAAGAATGAGAACA	NA	circbase	NA	NA	NA	NA	NA	NA	NA	NA	NA	NA	NA	hsa_circ_0002419	chr12	78443772	78452895	+	9123	613	NM_014903	NAV3
hsa_circ_0042611	6.64839	P	7.65516	P	0.497659	2.00941	down	circRNA	ACATATACAACCGAAACTGCCTTATTGAATTGGTCAACTGTCAGCAGGCACAGTGATGCG	NA	circbase	NA	NA	NA	NA	NA	NA	NA	NA	NA	NA	NA	hsa_circ_0042611	chr17	26951250	26958699	-	7449	656	NM_014680	KIAA0100
hsa_circ_0021518	4.08196	P	2.99671	A	2.12174	2.12174	up	circRNA	TAGAAAGCAAACATTTGTATGATAATCCTCTGTCTTTTGTGGGGAACTCAGCATTTCACA	NA	circbase	NA	NA	NA	NA	NA	NA	NA	NA	NA	NA	NA	hsa_circ_0021518	chr11	27387507	27402258	-	14751	3932	NM_018490	LGR4
hsa_circ_0030300	4.81252	P	6.81599	P	0.249399	4.00964	down	circRNA	TTTAGATGACTCTGCAATCACACCAATGTGTGAAGTGACAGGCGCTCCGTGCCCGGGACC	NA	circbase	NA	NA	NA	NA	NA	NA	NA	NA	NA	NA	NA	hsa_circ_0030300	chr13	51969435	52026191	-	56756	502	NM_012141	INTS6
hsa_circ_0051433	4.01454	P	2.41847	A	3.0232	3.0232	up	circRNA	TCACCACCATGTTGAGGCCCCAGGCTTGGCCTCACCACAATGTGGCACGAGGCTCGGAAG	NA	circbase	NA	NA	NA	NA	NA	NA	NA	NA	NA	NA	NA	hsa_circ_0051433	chr19	45543441	45556150	+	12709	328	NM_007056	CLASRP
hsa_circ_0073339	3.93316	P	2.02014	A	3.76597	3.76597	up	circRNA	ATATAAAGTGGACGTGGTGCCAATAAAGAATCAGGTGAACTGGGAGACAGTAGGACCCAA	NA	circbase	NA	NA	NA	NA	NA	NA	NA	NA	NA	NA	NA	hsa_circ_0073339	chr5	90083887	90087163	+	3276	864	NM_032119	GPR98
hsa_circ_0062647	6.8288	P	4.75548	P	4.20856	4.20856	up	circRNA	TTATGAAGAGTATCCGGAGTGTGATGCAGAAGTACCTTGCAGAGAGAAATGAAATAACCT	NA	circbase	NA	NA	NA	NA	NA	NA	NA	NA	NA	NA	NA	hsa_circ_0062647	chr22	26000343	26040632	+	40289	151	NM_005160	ADRBK2
hsa_circ_0015545	2.0179	A	4.34376	P	0.199455	5.01367	down	circRNA	ACAGTGTAAGCACTAAACTGAAGAGGCAGTGACCTGAAGTTGCCTGAGTGGAATTTCGAT	NA	circbase	NA	NA	NA	NA	NA	NA	NA	NA	NA	NA	NA	hsa_circ_0015545	chr1	182350838	182356427	-	5589	3657	NM_002065	GLUL
hsa_circ_0013368	4.02656	P	2.49696	A	2.88706	2.88706	up	circRNA	TTGCCCATGTAAACGGACCAATGGACTGCGAAGAACTCCTAAACAGGTGGATCCAGGTTT	NA	circbase	NA	NA	NA	NA	NA	NA	NA	NA	NA	NA	NA	hsa_circ_0013368	chr1	108160188	108226155	-	65967	249	NM_006113	VAV3
hsa_circ_0002375	3.24731	P	5.42357	P	0.221249	4.5198	down	circRNA	TATCAACACTGTTACTTTCGTACATTGACTTGGATTCTCACTTGCATTTATCTTCAGCTG	NA	circbase	NA	NA	NA	NA	NA	NA	NA	NA	NA	NA	NA	hsa_circ_0002375	chr12	88898935	88939642	-	40707	844	NM_000899	KITLG
hsa_circ_0060937	6.6778	P	5.24311	P	2.70325	2.70325	up	circRNA	GGTGGAAACGGTATCTGCCTCGTGTTGTATGAGAAGAGATTTGGGCTTCTCCAGAAGAAT	NA	circbase	NA	NA	NA	NA	NA	NA	NA	NA	NA	NA	NA	hsa_circ_0060937	chr20	52779255	52782372	-	3117	350	NM_000782	CYP24A1
hsa_circ_0077780	5.38848	P	4.38816	P	2.00045	2.00045	up	circRNA	TAAAGAGAATTCAGGTACCCATTGAAGGCCTGGAGAATGGGAAGACCTGGCTTCAGAAAA	NA	circbase	NA	NA	NA	NA	NA	NA	NA	NA	NA	NA	NA	hsa_circ_0077780	chr6	126210117	126211127	+	1010	1010	NM_001122842	NCOA7
hsa_circ_0029600	5.41241	P	1.19169	A	18.6451	18.6451	up	circRNA	GCGGTCGGAATGAAAGATGTACAAGCATGCACATCAGCCTAAGGTTGAAATCAAAGAGTG	NA	circbase	NA	NA	NA	NA	NA	NA	NA	NA	NA	NA	NA	hsa_circ_0029600	chr13	19907538	19907611	-	73	73	NR_027248	ANKRD26P3
hsa_circ_0044838	5.81657	P	3.50962	A	4.94835	4.94835	up	circRNA	TTCAAATATTAACTCTTGCTGCTGAGAACTAGCCCTAGACCTCTGCGTGAGGGTTCTTCT	NA	circbase	NA	NA	NA	NA	NA	NA	NA	NA	NA	NA	NA	hsa_circ_0044838	chr17	57430575	57479095	+	48520	5099	NM_001005404	YPEL2
hsa_circ_0083665	5.33132	P	7.10089	P	0.293297	3.40952	down	circRNA	TGTGAAGGAGGGATCGGACCCATCCACCTCAACGAGATCCAGTGCACAGGCAATGAGAAG	NA	circbase	NA	NA	NA	NA	NA	NA	NA	NA	NA	NA	NA	hsa_circ_0083665	chr8	23160794	23179794	-	19000	846	NM_002318	LOXL2
hsa_circ_0014634	3.64026	P	4.78648	P	0.451807	2.21334	down	circRNA	ATAAATAAATCTATAAATATTCGGTGGTTGAGTAGAAGCGGTCGCCATGTCCGCGGGGAG	NA	circbase	NA	NA	NA	NA	NA	NA	NA	NA	NA	NA	NA	hsa_circ_0014634	chr1	155882835	155904188	-	21353	2945	NM_014949	KIAA0907
hsa_circ_0080201	9.28125	P	10.5904	P	0.403566	2.47791	down	circRNA	GTCTGTCAGTTGATTGCCCCGTCAGACTTTTAAATCCAAACATAGCAAAAATGAAAGAAG	NA	circbase	NA	NA	NA	NA	NA	NA	NA	NA	NA	NA	NA	hsa_circ_0080201	chr7	48139266	48141579	+	2313	277	NM_181597	UPP1
hsa_circ_0043587	3.89526	P	1.43482	A	5.50385	5.50385	up	circRNA	GTAATAAAGAATTACTTTTCCTTTTGCAAATAGAGATGAAGGAGTTCAGCAGCCAGCTGG	NA	circbase	NA	NA	NA	NA	NA	NA	NA	NA	NA	NA	NA	hsa_circ_0043587	chr17	39669996	39672517	-	2521	911	NM_002275	KRT15
hsa_circ_0092259	3.41583	P	2.40614	A	2.01347	2.01347	up	circRNA	AGACTCACAGGTGTGGCAGAAAAAACACAGCTTCTGAAATTGAATGTACCTGCTACCTTT	NA	circbase	NA	NA	NA	NA	NA	NA	NA	NA	NA	NA	NA	hsa_circ_0092259	chrY	14958257	14959252	+	995	496	NM_004654	USP9Y
hsa_circ_0075685	6.64796	P	5.58835	P	2.08437	2.08437	up	circRNA	ACATCATCTCTAATGTAGCCGTGAGTTCAGGCAGTGGGCAGAATGATCTGGAAAAGATGA	NA	circbase	NA	NA	NA	NA	NA	NA	NA	NA	NA	NA	NA	hsa_circ_0075685	chr6	16254792	16279121	+	24329	363	NM_006877	GMPR
hsa_circ_0031366	7.9444	P	8.98619	P	0.485723	2.05879	down	circRNA	TTTTTAATGAAGGACATTGGAGGCAATGAAACAGTGACACTGCGCCAGTCGTTTGTGCCT	NA	circbase	NA	NA	NA	NA	NA	NA	NA	NA	NA	NA	NA	hsa_circ_0031366	chr14	24718319	24718747	-	428	428	NM_000359	TGM1
hsa_circ_0070371	1.44496	A	5.16245	P	0.0760195	13.1545	down	circRNA	CAGAGCAACCAAGATGCCCAAGATATTGATAATGAATATTTCTTTGTTGATCCTGACTTA	NA	circbase	NA	NA	NA	NA	NA	NA	NA	NA	NA	NA	NA	hsa_circ_0070371	chr4	87655455	87666281	+	10826	792	NM_080685	PTPN13
hsa_circ_0027147	3.32418	P	4.34198	P	0.49387	2.02483	down	circRNA	GGCACTGGCGGAAGGTGTTTTTCACTGACTATGGGCAGATCCCAAAGGTGGAACGCTGTG	NA	circbase	NA	NA	NA	NA	NA	NA	NA	NA	NA	NA	NA	hsa_circ_0027147	chr12	57548261	57597304	+	49043	9947	NM_002332	LRP1
hsa_circ_0064518	3.67593	P	1.09972	A	5.9637	5.9637	up	circRNA	GCATATATGGTGTGCTGTTCAGAGAATGTTTGTAAGTGTTGTACAGAAGAGGAGGAAAAA	NA	circbase	NA	NA	NA	NA	NA	NA	NA	NA	NA	NA	NA	hsa_circ_0064518	chr3	15776916	15838144	-	61228	1854	NM_001195098	ANKRD28
hsa_circ_0006614	5.12667	P	6.47772	P	0.392007	2.55097	down	circRNA	AAAGCCACAGTATCCGATCTCCAGTCTGGCTCAGCTGCCAGTGGTGGGAGTGGTGCCGGA	NA	circbase	NA	NA	NA	NA	NA	NA	NA	NA	NA	NA	NA	hsa_circ_0006614	chr3	183493702	183508768	+	15066	729	NM_018023	YEATS2
hsa_circ_0019164	10.1073	P	9.09516	P	2.0169	2.0169	up	circRNA	CTGCCCTCAGTAAATCCATGGTTAATAAATGTGGTTTCTACATTAAGTTACAGAGTTGTT	NA	circbase	NA	NA	NA	NA	NA	NA	NA	NA	NA	NA	NA	hsa_circ_0019164	chr10	94389932	94415152	+	25220	3465	NM_004523	KIF11
hsa_circ_0037748	4.32367	P	2.16	A	4.48051	4.48051	up	circRNA	GAGAATGAAGGGCCCTGAAAAAAACTCTCTTCCTGTGTCTGGCCAGAGGTATAGAGAGAG	NA	circbase	NA	NA	NA	NA	NA	NA	NA	NA	NA	NA	NA	hsa_circ_0037748	chr16	4810492	4816077	-	5585	858	NM_021646	ZNF500
hsa_circ_0047537	3.51099	P	8.49162	P	0.0316724	31.5732	down	circRNA	TGGGCCACAGGTGATTATTTACCTGAAACAACAAGACCTCAAGAGATGATGAAAATTTTT	NA	circbase	NA	NA	NA	NA	NA	NA	NA	NA	NA	NA	NA	hsa_circ_0047537	chr18	43502306	43523277	-	20971	1306	NM_020964	EPG5
hsa_circ_0090600	3.44043	P	4.69249	P	0.419846	2.38183	down	circRNA	TGCGCCCTGGGCATGCGCAGGCTACCCAGCCGCGGGGGGTGCACGGAGAAAAGGGGCGGG	NA	circbase	NA	NA	NA	NA	NA	NA	NA	NA	NA	NA	NA	hsa_circ_0090600	chrX	51927918	51932690	+	4772	1802	NM_001242362	MAGED4B
hsa_circ_0046517	4.05155	P	5.93095	P	0.271796	3.67922	down	circRNA	ATGAAGATCAGCCACTGGGATGGTTTCCAGGAGACTGACAAGGCGTGGCATGGGGGATGT	NA	circbase	NA	NA	NA	NA	NA	NA	NA	NA	NA	NA	NA	hsa_circ_0046517	chr17	80772715	80858607	+	85892	507	NM_005993	TBCD
hsa_circ_0027686	3.5489	P	1.24947	A	4.92266	4.92266	up	circRNA	ATCAAAATCATTAATCCAGGAAGATATTCTTGATACTGGAAATGACAAAAATGGAAAGGA	NA	circbase	NA	NA	NA	NA	NA	NA	NA	NA	NA	NA	NA	hsa_circ_0027686	chr12	86276000	86276770	+	770	770	NM_006183	NTS
hsa_circ_0011587	4.28409	P	3.0371	A	2.37345	2.37345	up	circRNA	AAAGGCAAATGTTCTTAAATGTTAGAAACCACAGGAATCAGTACCAAGCTTTGAAGCCTC	NA	circbase	NA	NA	NA	NA	NA	NA	NA	NA	NA	NA	NA	hsa_circ_0011587	chr1	36208741	36212593	-	3852	516	NM_022111	CLSPN
hsa_circ_0085078	3.90842	P	6.14044	P	0.21286	4.69793	down	circRNA	GGCTGCAGAGGTGCTGTACTTCTTTGCAGTATACAAGGACTAGCAGTTAATATTGACCCA	NA	circbase	NA	NA	NA	NA	NA	NA	NA	NA	NA	NA	NA	hsa_circ_0085078	chr8	100396435	100589861	+	193426	2471	NM_017890	VPS13B
hsa_circ_0078117	4.17734	P	2.57154	A	3.04365	3.04365	up	circRNA	TCGGGTTCAGCTCATCCTAATGTCCAAAAGGTGGTGCTAGTATCATCTGCGTCAGATATT	NA	circbase	NA	NA	NA	NA	NA	NA	NA	NA	NA	NA	NA	hsa_circ_0078117	chr6	144869775	145119126	+	249351	2650	NM_007124	UTRN
hsa_circ_0085774	4.12824	P	1.25665	A	7.31871	7.31871	up	circRNA	TCTCGACCACTTCGAAGAAGTCAGCAAGGATGAGTACTGTTTCTACAATGGCAAAACGCA	NA	circbase	NA	NA	NA	NA	NA	NA	NA	NA	NA	NA	NA	hsa_circ_0085774	chr8	142151301	142161936	+	10635	573	NM_014957	DENND3
hsa_circ_0044699	2.26918	A	4.07457	P	0.286104	3.49524	down	circRNA	GATATGGATTGAAGCCAAAGCTGTAGTTGAAGAAACAAGAGCCCTGCGTAGTCGGATTCA	NA	circbase	NA	NA	NA	NA	NA	NA	NA	NA	NA	NA	NA	hsa_circ_0044699	chr17	53150260	53158544	+	8284	478	NM_178509	STXBP4
hsa_circ_0007363	2.02902	A	4.12204	P	0.234391	4.26638	down	circRNA	GCACAATACAAAGAAGTAAAAGTGGTGGCTAATATAAAACAGGTGGGAAGAAGTTCTCCA	NA	circbase	NA	NA	NA	NA	NA	NA	NA	NA	NA	NA	NA	hsa_circ_0007363	chr1	150418701	150418877	+	176	176	NM_015203	RPRD2
hsa_circ_0052520	5.28885	P	4.21617	P	2.10333	2.10333	up	circRNA	GAAATTGCAGTATCTGCTGAAGGTCAACGAAATCAAGATTAAAAAGGGAGTAGATTTACT	NA	circbase	NA	NA	NA	NA	NA	NA	NA	NA	NA	NA	NA	hsa_circ_0052520	chr2	9467954	9525487	+	57533	1530	NM_003887	ASAP2
hsa_circ_0035585	5.27939	P	3.54075	P	3.33721	3.33721	up	circRNA	GAGGAGTTCCATGTTCCTTTAGATTCATATAGATGACTCTGTTAGACCAAATATGACTTT	NA	circbase	NA	NA	NA	NA	NA	NA	NA	NA	NA	NA	NA	hsa_circ_0035585	chr15	62210334	62219519	-	9185	1474	NM_001018088	VPS13C
hsa_circ_0034922	3.81905	P	5.22039	P	0.378576	2.64148	down	circRNA	ACCTGAGAATGTATATCCTGATCAGCAAACCCACAATATGGACAGAAAGATTAAGAATGC	NA	circbase	NA	NA	NA	NA	NA	NA	NA	NA	NA	NA	NA	hsa_circ_0034922	chr15	43322141	43340689	-	18548	940	NM_174916	UBR1
hsa_circ_0085022	5.62875	P	3.14949	A	5.57611	5.57611	up	circRNA	CGCTGCCGAAGGAAAGATGTCTGCCAAGCTATAGACCATGGCTGTGAACACATTTGTGTG	NA	circbase	NA	NA	NA	NA	NA	NA	NA	NA	NA	NA	NA	hsa_circ_0085022	chr8	99030221	99030344	+	123	123	NM_002380	MATN2
hsa_circ_0064472	5.62262	P	1.19489	A	21.5218	21.5218	up	circRNA	CTGATGGGAAAAAAGTTTATTACCCAGTCTTATGAAACTGCTGATAAAGTCCTGCAAAAT	NA	circbase	NA	NA	NA	NA	NA	NA	NA	NA	NA	NA	NA	hsa_circ_0064472	chr3	15259979	15283760	+	23781	1495	NM_014296	CAPN7
hsa_circ_0012926	3.98067	P	2.83859	A	2.207	2.207	up	circRNA	TAGACTATAGGGTTGAAGCATTTGGATTGTAATTCAAATCTCTTGGAAACTATACCTCCT	NA	circbase	NA	NA	NA	NA	NA	NA	NA	NA	NA	NA	NA	hsa_circ_0012926	chr1	70625012	70644676	-	19664	559	NM_017768	LRRC40
hsa_circ_0062282	1.21501	A	3.52272	P	0.20198	4.95099	down	circRNA	AAGAAGGCCAAAGAGGAGTGGTTCCACCAAGGAGCAGAGCCCAGGCAGCCAGGCCTCACT	NA	circbase	NA	NA	NA	NA	NA	NA	NA	NA	NA	NA	NA	hsa_circ_0062282	chr22	19964228	19969614	-	5386	1678	NM_001670	ARVCF
hsa_circ_0045185	1.81599	A	4.35593	P	0.17195	5.81565	down	circRNA	TATTTATAAATGGCTAACACTTGGAAAACCAGTGATGCTGAACAGGAGCTTGGCCCCCCT	NA	circbase	NA	NA	NA	NA	NA	NA	NA	NA	NA	NA	NA	hsa_circ_0045185	chr17	61271351	61505067	+	233716	11513	NM_025185	TANC2
hsa_circ_0048641	4.07723	P	6.19923	P	0.229727	4.35298	down	circRNA	ACTCTGTTTACAACCATAGACACCCTGCAGCCCGTCGGAGACAACATCAGCGGTATGGCC	NA	circbase	NA	NA	NA	NA	NA	NA	NA	NA	NA	NA	NA	hsa_circ_0048641	chr19	4542605	4555576	-	12971	3203	NM_032108	SEMA6B
hsa_circ_0052988	3.79667	P	2.45895	A	2.52751	2.52751	up	circRNA	TTCTTCTTCAAATGGCTGAGAGCTAGCAAGGAAAACTCAGGACCATGATGGCTCAGTTTC	NA	circbase	NA	NA	NA	NA	NA	NA	NA	NA	NA	NA	NA	hsa_circ_0052988	chr2	24533357	24550984	-	17627	589	NM_006277	ITSN2
hsa_circ_0035729	3.84154	P	2.82069	A	2.02911	2.02911	up	circRNA	ATGCAAATAGAAGACTGGGACATGTTGGATGTTGATGAAGATGAAAAGCTAACTGGTGAA	NA	circbase	NA	NA	NA	NA	NA	NA	NA	NA	NA	NA	NA	hsa_circ_0035729	chr15	63951934	63952135	-	201	201	NM_003922	HERC1
hsa_circ_0053385	6.67246	P	5.282	P	2.62161	2.62161	up	circRNA	AATGGTCCAGGGGGAGTATTTCTCAGCATTCAAGCAGGCCTCCCGGAGAGAAGATGACAT	NA	circbase	NA	NA	NA	NA	NA	NA	NA	NA	NA	NA	NA	hsa_circ_0053385	chr2	31571133	31600103	-	28970	1905	NM_000379	XDH
hsa_circ_0057809	3.68625	P	2.28508	A	2.64117	2.64117	up	circRNA	AATCTGAAACTGTTGGAGGAGACCGTAAACAAGGTCTTCACAGTATGAACATGATGGAGG	NA	circbase	NA	NA	NA	NA	NA	NA	NA	NA	NA	NA	NA	hsa_circ_0057809	chr2	203379610	203379702	+	92	92	NM_001204	BMPR2
hsa_circ_0071083	2.5692	A	3.65922	P	0.469755	2.12877	down	circRNA	AAGCACACAGATTTGATCTCACATTAACCAAGGAGGAGAATGTGAGAAAAGGGGGAAAAT	NA	circbase	NA	NA	NA	NA	NA	NA	NA	NA	NA	NA	NA	hsa_circ_0071083	chr4	146695657	146859607	-	163950	2908	NM_178835	ZNF827
hsa_circ_0015716	6.15094	P	5.13176	P	2.02677	2.02677	up	circRNA	GAAAGTCCAGGTCAGCCTAGCAACAAAGAAGATGTGGATGATCTTGTGAGTCAGCTAAGA	NA	circbase	NA	NA	NA	NA	NA	NA	NA	NA	NA	NA	NA	hsa_circ_0015716	chr1	186312457	186316590	-	4133	974	NM_003292	TPR
hsa_circ_0061738	1.39344	A	4.50841	P	0.115425	8.66364	down	circRNA	TCTCTATTAGGTGGTATGTTTTTAGCCACAGGTAGTACTGATCATGTAATCAGAATGTAT	NA	circbase	NA	NA	NA	NA	NA	NA	NA	NA	NA	NA	NA	hsa_circ_0061738	chr21	40601237	40649277	-	48040	2122	NM_033656	BRWD1
hsa_circ_0021540	6.30215	P	3.30795	A	7.96792	7.96792	up	circRNA	AGAAAATATGTAGTACTGCAGTTTCATATCTGGAGTACTTGCCTATGGTGCCACTGGTGC	NA	circbase	NA	NA	NA	NA	NA	NA	NA	NA	NA	NA	NA	hsa_circ_0021540	chr11	28116189	28116347	-	158	158	NM_031217	KIF18A
hsa_circ_0066689	4.07965	P	5.38894	P	0.403518	2.47821	down	circRNA	ATTGTACTCATTGTGTAAAAAACAGTTTCAGTACAGTGCCTCTTTGCGAGCACATCTTAT	NA	circbase	NA	NA	NA	NA	NA	NA	NA	NA	NA	NA	NA	hsa_circ_0066689	chr3	101373547	101378872	-	5325	509	NM_014415	ZBTB11
hsa_circ_0061302	3.29135	P	1.89548	A	2.63147	2.63147	up	circRNA	GAAATGGAACATCATGATGACACCGAACATGCAAGGTATTATCATGGCGATAGGTAAATC	NA	circbase	NA	NA	NA	NA	NA	NA	NA	NA	NA	NA	NA	hsa_circ_0061302	chr21	17222095	17250310	+	28215	15149	NM_013396	USP25
hsa_circ_0021215	4.75167	P	7.30636	P	0.170201	5.87541	down	circRNA	GCAACTAAGGATTTTACACCCAGATTTGGAAGTAGCAGATCATGCTTTTCCTCCTCCACG	NA	circbase	NA	NA	NA	NA	NA	NA	NA	NA	NA	NA	NA	hsa_circ_0021215	chr11	9838386	10015545	-	177159	3003	NM_030962	SBF2
hsa_circ_0056855	6.33906	P	3.44475	A	7.43488	7.43488	up	circRNA	TCATTCACAGCATCAATGAAAAAGGTAACGGCGACTGTGACTGTGGTGAATGTGTGTGCA	NA	circbase	NA	NA	NA	NA	NA	NA	NA	NA	NA	NA	NA	hsa_circ_0056855	chr2	160968590	160983112	-	14522	441	NM_000888	ITGB6
hsa_circ_0052440	4.19783	P	3.14413	A	2.07584	2.07584	up	circRNA	TTTTCAAATGGAGCGACTGGACTCAAACACACTTCACTGCGACTGTGAAATCCTGTGGTT	NA	circbase	NA	NA	NA	NA	NA	NA	NA	NA	NA	NA	NA	hsa_circ_0052440	chr2	1635658	1684134	-	48476	6197	NM_012293	PXDN
hsa_circ_0035263	5.2853	P	7.47934	P	0.218539	4.57585	down	circRNA	ATAACACCATTCATCACAAAGACAGCCGCTCAGGAAGCAATCTTGCATGCGTCTGGAAAT	NA	circbase	NA	NA	NA	NA	NA	NA	NA	NA	NA	NA	NA	hsa_circ_0035263	chr15	51023161	51041943	-	18782	1023	NM_032802	SPPL2A
hsa_circ_0091342	4.41305	P	2.03906	A	5.18373	5.18373	up	circRNA	ACGGCAGGCCAGGAAAGTGCTGGCCAGCTGGAAATAAGAGCTCTTTCTCTAATTTATAAT	NA	circbase	NA	NA	NA	NA	NA	NA	NA	NA	NA	NA	NA	hsa_circ_0091342	chrX	110955711	110980107	+	24396	1810	NR_033127	ALG13
hsa_circ_0006084	4.45472	P	2.83716	A	3.06856	3.06856	up	circRNA	GAGATTGAAGGACCATCTGAATCTGATAATTTTTCTCATAACCTGAGAGGAGTAATCCCA	NA	circbase	NA	NA	NA	NA	NA	NA	NA	NA	NA	NA	NA	hsa_circ_0006084	chr3	44826336	44835918	+	9582	488	NM_020242	KIF15
hsa_circ_0047524	3.81335	P	2.69975	A	2.16385	2.16385	up	circRNA	CTTCTTCAAAGATGACTCTTGGTTATGTAAGTGACCATTGGGCACAGTATGTGAGCCATA	NA	circbase	NA	NA	NA	NA	NA	NA	NA	NA	NA	NA	NA	hsa_circ_0047524	chr18	43450531	43519721	-	69190	4282	NM_020964	EPG5
hsa_circ_0005659	4.07871	P	3.07374	A	2.0069	2.0069	up	circRNA	TGGCTTCCATGCATGATTTTGAAGTCAGAGGAGATGTGGTCAATGGAAGAAACCACCAAG	NA	circbase	NA	NA	NA	NA	NA	NA	NA	NA	NA	NA	NA	hsa_circ_0005659	chr17	41199659	41209152	-	9493	274	NM_007300	BRCA1
hsa_circ_0024523	7.09969	P	8.17246	P	0.475404	2.10347	down	circRNA	TACTGTCCAGGCAGCTGCAGTTCTCACCTGAGGAAGTGTTGGGCATGGTTCTCAATTATT	NA	circbase	NA	NA	NA	NA	NA	NA	NA	NA	NA	NA	NA	hsa_circ_0024523	chr11	118920267	118925772	-	5505	1387	NM_006389	HYOU1
hsa_circ_0027414	4.39085	P	5.43482	P	0.484992	2.06189	down	circRNA	TTCTCCACCTGGTGAAGATGAAGCCATGTTTGTAGAATATAGAAAACAACTGAAGTTACT	NA	circbase	NA	NA	NA	NA	NA	NA	NA	NA	NA	NA	NA	hsa_circ_0027414	chr12	64818378	64821900	+	3522	555	NM_007235	XPOT
hsa_circ_0000123	12.6925	P	9.34766	P	10.16	10.16	up	circRNA	TTCTCAGATCTCCTTGAAAATTGAGGCCTTTTCGATAGTTTCGGGTCAGCAGGCAATCTC	NA	circbase	NA	NA	NA	NA	NA	NA	NA	NA	NA	NA	NA	hsa_circ_0000123	chr1	145441364	145441533	+	169	169	NM_006472	TXNIP
hsa_circ_0021535	1.10856	A	4.14277	P	0.122071	8.19197	down	circRNA	GTTCAGCCTATTCCTTGTTGTATATAATGAACAGATTCGTGATCTCTTAGTAAATTCAGG	NA	circbase	NA	NA	NA	NA	NA	NA	NA	NA	NA	NA	NA	hsa_circ_0021535	chr11	28080472	28113060	-	32588	1465	NM_031217	KIF18A
hsa_circ_0073309	3.31937	P	1.45931	A	3.63023	3.63023	up	circRNA	ATAGAATCTAGTGAAGATTATAGTATAGCTTCATCAGATGTGGTCTTGCTAGAAGGGGAA	NA	circbase	NA	NA	NA	NA	NA	NA	NA	NA	NA	NA	NA	hsa_circ_0073309	chr5	89985677	90460033	+	474356	12747	NM_032119	GPR98
hsa_circ_0000039	2.90073	A	4.01656	P	0.461427	2.16719	down	circRNA	CAAGAGGAAGAAGAAAGTGTTAAAAAGAATAATGCATATACTGCCATGTCAGATTCCTAC	NA	circbase	NA	NA	NA	NA	NA	NA	NA	NA	NA	NA	NA	hsa_circ_0000039	chr1	29068914	29070498	+	1584	1584	NM_001173128	YTHDF2
hsa_circ_0069182	4.02275	P	2.94407	A	2.1121	2.1121	up	circRNA	TGACCCTGCAGGTTGGCTCTAGGGCTGGCACCAGGCACTGGAATTAAACATTCTGGACTC	NA	circbase	NA	NA	NA	NA	NA	NA	NA	NA	NA	NA	NA	hsa_circ_0069182	chr4	9892233	10041872	-	149639	1287	NM_001001290	SLC2A9
hsa_circ_0073428	1.20925	A	3.71713	P	0.175813	5.68785	down	circRNA	GGAGTTGCTGGAGAAATCTTTACATGGGTTAGCAAACTTGTATGAGAAATATAATCACAT	NA	circbase	NA	NA	NA	NA	NA	NA	NA	NA	NA	NA	NA	hsa_circ_0073428	chr5	94852619	94877610	-	24991	2202	NM_014639	TTC37
hsa_circ_0035941	3.68737	P	2.39472	A	2.44976	2.44976	up	circRNA	TGTGTTGATGTAGATACCAACACTATTTCTCAATGATTTTCCCTTTCCACTGGCCATGCC	NA	circbase	NA	NA	NA	NA	NA	NA	NA	NA	NA	NA	NA	hsa_circ_0035941	chr15	66021409	66021585	-	176	176	NM_001144823	DENND4A
hsa_circ_0028126	1.83054	A	3.78562	P	0.257907	3.87737	down	circRNA	ACTTCCCGGAAATGTTCAGGCAGATCGAGGAGTCCGTGCGCTACATGGTTATGCGCTACG	NA	circbase	NA	NA	NA	NA	NA	NA	NA	NA	NA	NA	NA	hsa_circ_0028126	chr12	109678882	109680397	+	1515	360	NM_001093	ACACB
hsa_circ_0082044	3.71369	P	1.60793	A	4.30423	4.30423	up	circRNA	AGGAAGGAAGGAATGAAACGACAGTCCTTGCTCCACATGAAACAATCTTTCGAGCCGAAG	NA	circbase	NA	NA	NA	NA	NA	NA	NA	NA	NA	NA	NA	hsa_circ_0082044	chr7	120739979	120884392	+	144413	1561	NM_024913	C7orf58
hsa_circ_0080906	6.25764	P	8.97711	M	0.15183	6.58631	down	circRNA	CAACATCAAGATGAGGAGCTTTTCTCTGGAATGTATATAGATTTCATGGGGACAGATGCT	NA	circbase	NA	NA	NA	NA	NA	NA	NA	NA	NA	NA	NA	hsa_circ_0080906	chr7	80430072	80435074	-	5002	448	NM_006379	SEMA3C
hsa_circ_0029871	5.07035	P	2.94632	A	4.3591	4.3591	up	circRNA	CCGAAGCAAGATACAGGTAGACCTTTCGTAGAGATGTACAGTGAAATCCCCGAAATTATA	NA	circbase	NA	NA	NA	NA	NA	NA	NA	NA	NA	NA	NA	hsa_circ_0029871	chr13	29001295	29012482	-	11187	1048	NM_002019	FLT1
hsa_circ_0017370	3.3913	P	2.24328	A	2.21609	2.21609	up	circRNA	AGAGCCCTGAGACACGACAGTTCCTGTTCCTCTCAGAGGTCTTGCAGTGGAGAGCACAGA	NA	circbase	NA	NA	NA	NA	NA	NA	NA	NA	NA	NA	NA	hsa_circ_0017370	chr10	355970	402446	-	46476	1082	NM_014974	DIP2C
hsa_circ_0092149	7.69113	P	1.09191	A	96.9535	96.9535	up	circRNA	TTGAAATGCCAAGCTGTATCGCATCCATTGAATACTGTGACCGAGGACATGTACACCAAC	NA	circbase	NA	NA	NA	NA	NA	NA	NA	NA	NA	NA	NA	hsa_circ_0092149	chrX	154006958	154020560	-	13602	1792	NM_001166462	MPP1
hsa_circ_0061910	5.85516	P	2.18851	A	12.6991	12.6991	up	circRNA	CTTGCCAGGGCAAAACCCTCATTTCGAGCCTAATGGGCTAATATCTTACACTTTAAAAAT	NA	circbase	NA	NA	NA	NA	NA	NA	NA	NA	NA	NA	NA	hsa_circ_0061910	chr21	45212811	45223983	+	11172	1828	NM_003683	RRP1
hsa_circ_0082647	6.38723	P	5.13534	P	2.38153	2.38153	up	circRNA	TAGTCAAGCTAAGTGTGCCAACATTGAGTTACAGCTACAAGAACTAGGCCCTGTCATTCG	NA	circbase	NA	NA	NA	NA	NA	NA	NA	NA	NA	NA	NA	hsa_circ_0082647	chr7	138954139	138957186	+	3047	249	NM_173569	UBN2
hsa_circ_0068265	7.87392	P	6.08674	P	3.45138	3.45138	up	circRNA	TGCCACATTGATCCTAGGGAACCAGATCCACATGCACGTAACAGCTAAGGAATATGGTGC	NA	circbase	NA	NA	NA	NA	NA	NA	NA	NA	NA	NA	NA	hsa_circ_0068265	chr3	183858205	183858518	+	313	313	NM_003907	EIF2B5
hsa_circ_0081049	4.4617	P	2.96003	A	2.8317	2.8317	up	circRNA	ACTATTAAAGTTGGAATCAACTGGACTCGGCCTTAGTAGTAGTAGACTAAGAACAACTCT	NA	circbase	NA	NA	NA	NA	NA	NA	NA	NA	NA	NA	NA	hsa_circ_0081049	chr7	92963428	92979345	+	15917	486	NM_017667	CCDC132
hsa_circ_0065623	5.99069	P	7.37581	P	0.382858	2.61194	down	circRNA	AGGAACAGCTGTGAAGGTACGAGGTCTGCAGCACTTCCGTGGATGGCTCGGAATGTGTCA	NA	circbase	NA	NA	NA	NA	NA	NA	NA	NA	NA	NA	NA	hsa_circ_0065623	chr3	49329942	49332031	-	2089	281	NM_003363	USP4
hsa_circ_0052978	4.42249	P	3.02497	A	2.63449	2.63449	up	circRNA	AGTCAACAGTACCAGAAGCTTTGTATGCAGCTGTAAATAAGAAACCTACCTCGGCAGCCT	NA	circbase	NA	NA	NA	NA	NA	NA	NA	NA	NA	NA	NA	hsa_circ_0052978	chr2	24468997	24477300	-	8303	689	NM_006277	ITSN2
hsa_circ_0070660	6.87801	P	5.85564	P	2.03126	2.03126	up	circRNA	CCAAAGAGAGGTTTTGCGTGTGAAGCTGTGTGGAAATGTGAAATACTACCAGTCACACCA	NA	circbase	NA	NA	NA	NA	NA	NA	NA	NA	NA	NA	NA	hsa_circ_0070660	chr4	110580166	110585550	+	5384	352	NM_017918	CCDC109B
hsa_circ_0074613	2.44423	A	3.86854	P	0.3726	2.68384	down	circRNA	ACAACAGGATGTCCAGCCTACGAGCGGGACCTGGAGGCTGACATCATCGGCGACACCTCT	NA	circbase	NA	NA	NA	NA	NA	NA	NA	NA	NA	NA	NA	hsa_circ_0074613	chr5	150513987	150515896	-	1909	137	NM_001155	ANXA6
hsa_circ_0019040	5.14949	P	4.09115	P	2.08253	2.08253	up	circRNA	ATGACATGAAGAGTGGTTCTGATTAAAGCCCAGATTTCAGAGCTGGCATTTCCTATTACA	NA	circbase	NA	NA	NA	NA	NA	NA	NA	NA	NA	NA	NA	hsa_circ_0019040	chr10	88939831	88951222	+	11391	1327	NM_019054	FAM35A
hsa_circ_0072181	3.81254	P	1.33251	A	5.57911	5.57911	up	circRNA	ATCCAGTTCAGATAAGCCTTTGAAAAAAAGAAAACAAGATTCTTACCCACAGGAGGCTGG	NA	circbase	NA	NA	NA	NA	NA	NA	NA	NA	NA	NA	NA	hsa_circ_0072181	chr5	36984777	37049403	+	64626	5459	NM_015384	NIPBL
hsa_circ_0057889	1.57339	A	4.63741	P	0.119574	8.36301	down	circRNA	CAGCTGACAGGTAAATGGGAGAGATGTCACCGGACGAACCCAGGAAGAGCTTGTGGCCAT	NA	circbase	NA	NA	NA	NA	NA	NA	NA	NA	NA	NA	NA	hsa_circ_0057889	chr2	205990332	206305396	+	315064	1553	NM_152526	PARD3B
hsa_circ_0021839	7.86431	P	3.5914	P	19.332	19.332	up	circRNA	TTCCAACAGCAGGAGCAGCGAGCGGCCTGGAGAGTTTTCAACGTCCTTTATCCCATGCCT	NA	circbase	NA	NA	NA	NA	NA	NA	NA	NA	NA	NA	NA	hsa_circ_0021839	chr11	46431825	46439602	-	7777	233	NM_017749	AMBRA1
hsa_circ_0013640	4.23741	P	2.87385	A	2.5732	2.5732	up	circRNA	TATACAATGAGTGCTGATAGTTGATCTCTGTGCAGACAAGTTCTTACAGGAGGTGAGTGC	NA	circbase	NA	NA	NA	NA	NA	NA	NA	NA	NA	NA	NA	hsa_circ_0013640	chr1	115118210	115138494	-	20284	14701	NM_005872	BCAS2
hsa_circ_0075042	3.63293	P	1.98702	A	3.12944	3.12944	up	circRNA	TGGAAATGATCTGCTGATGCAGATGTTGGACAAATTTCCCATGGAAGGAGGACAGAAGGA	NA	circbase	NA	NA	NA	NA	NA	NA	NA	NA	NA	NA	NA	hsa_circ_0075042	chr5	171808064	171833356	-	25292	1220	NM_001017995	SH3PXD2B
hsa_circ_0084693	5.3973	P	4.24517	P	2.22242	2.22242	up	circRNA	TCCCACATGCGTTGGGTGTAATCCTAATGAAGATGTAGCTATTTTTGCAGTAGACTCCTT	NA	circbase	NA	NA	NA	NA	NA	NA	NA	NA	NA	NA	NA	hsa_circ_0084693	chr8	68130016	68139833	-	9817	1022	NM_006421	ARFGEF1
hsa_circ_0034603	3.86389	P	2.12936	A	3.32772	3.32772	up	circRNA	TGACAAAGAGAAACTCCAAGATGGGAGAATAACAATAAGGGAGTTCTTTATACTTCTCCA	NA	circbase	NA	NA	NA	NA	NA	NA	NA	NA	NA	NA	NA	hsa_circ_0034603	chr15	40921470	40937285	+	15815	306	NM_170589	CASC5
hsa_circ_0055732	1.11805	A	3.86847	P	0.148607	6.72917	down	circRNA	CCTCCAGGAAAAGATTATTTCAAAACTATACATCCCAAAGAGAAAGATTATTTCTCCACG	NA	circbase	NA	NA	NA	NA	NA	NA	NA	NA	NA	NA	NA	hsa_circ_0055732	chr2	97817615	97833504	+	15889	532	NM_001164315	ANKRD36
hsa_circ_0002934	1.59505	A	3.69844	P	0.232711	4.29718	down	circRNA	TGGGGAAGTAAGGACCAGAGACAAAAAGGTTTTTGGATTCAAAGCATAAAAACCATTACA	NA	circbase	NA	NA	NA	NA	NA	NA	NA	NA	NA	NA	NA	hsa_circ_0002934	chr10	89685269	89693008	+	7739	328	NM_000314	PTEN
hsa_circ_0049652	10.6845	P	11.7655	P	0.472699	2.11551	down	circRNA	ATTTTGTGTCTCCGTCAAGTCTGGCACCATCTTTGACAACTTCCTCATCACCAACGATGA	NA	circbase	NA	NA	NA	NA	NA	NA	NA	NA	NA	NA	NA	hsa_circ_0049652	chr19	13054350	13055304	+	954	871	NM_004343	CALR
hsa_circ_0032841	8.29884	P	9.30268	P	0.498672	2.00532	down	circRNA	CTCTCCCAAGGGACAGACTCTGAAGAAGAGGCTGCTAAGAGACGGCAGATGCAGGAAGCA	NA	circbase	NA	NA	NA	NA	NA	NA	NA	NA	NA	NA	NA	hsa_circ_0032841	chr14	81969064	81970650	-	1586	269	NM_005065	SEL1L
hsa_circ_0013429	1.80073	A	6.44377	P	0.0400228	24.9857	down	circRNA	GATTCATCTAAATAAATATGTGGTTCCCCAACCAGCAGTGAAAATCTAGAGCTGGAGCTC	NA	circbase	NA	NA	NA	NA	NA	NA	NA	NA	NA	NA	NA	hsa_circ_0013429	chr1	109834989	109849663	-	14674	1369	NM_001010985	MYBPHL
hsa_circ_0054437	3.59574	P	2.54214	A	2.0757	2.0757	up	circRNA	AGACAGAGCTTTAAAATGCAGTCACCCTAGAGAATCCTTTACTTACCTGTGCTGAAAAAA	NA	circbase	NA	NA	NA	NA	NA	NA	NA	NA	NA	NA	NA	hsa_circ_0054437	chr2	45928521	45928630	+	109	109	NM_005400	PRKCE
hsa_circ_0049980	4.56577	P	9.17846	M	0.0408733	24.4659	down	circRNA	CCAGTGGCAGACAAGCCGGGATGTTTCCTGCGTGGTCTTTGCCCTCTTCAACGTGATCTG	NA	circbase	NA	NA	NA	NA	NA	NA	NA	NA	NA	NA	NA	hsa_circ_0049980	chr19	17438497	17441798	-	3301	1587	NM_020959	ANO8
hsa_circ_0080918	3.10286	A	4.13312	P	0.48962	2.0424	down	circRNA	CAATGTCTTGGTAATGGATTGTGTGATTCTGGATGATGGTGGGTTTCTTCTGATGGCAAA	NA	circbase	NA	NA	NA	NA	NA	NA	NA	NA	NA	NA	NA	hsa_circ_0080918	chr7	81588590	81594981	-	6391	657	NM_000722	CACNA2D1
hsa_circ_0027975	3.25627	P	4.81525	P	0.339391	2.94646	down	circRNA	GCCAGCACAGATTTCAAAGGAGGTCAATGAAATCATGGTAAAAATGCCATACCAGTGTTT	NA	circbase	NA	NA	NA	NA	NA	NA	NA	NA	NA	NA	NA	hsa_circ_0027975	chr12	105440487	105446709	-	6222	576	NM_001034173	ALDH1L2
hsa_circ_0040560	3.13259	A	4.20461	P	0.475654	2.10237	down	circRNA	TGTGGTGGAGGCCTCAGTATGGTGGCTTATTCTGTCCAGGTTCTAGCCGTATTTATCAGC	NA	circbase	NA	NA	NA	NA	NA	NA	NA	NA	NA	NA	NA	hsa_circ_0040560	chr16	77334159	77359935	-	25776	815	NM_199355	ADAMTS18
hsa_circ_0078855	3.74553	P	2.03727	A	3.26766	3.26766	up	circRNA	CCTCATTGTGTGTGATCCAGGCCAAGCCACCAAGTACCTATATGAGCTGCTCTACAACGA	NA	circbase	NA	NA	NA	NA	NA	NA	NA	NA	NA	NA	NA	hsa_circ_0078855	chr6_dbb_hap3	895024	895159	-	135	135	---	---
hsa_circ_0067063	3.71828	P	1.40895	A	4.95651	4.95651	up	circRNA	AAGTTCGAAGGGCGGGAAGGATTCTTCAAAATTAACAGAAACCAATTCGGGCCAGCTGAA	NA	circbase	NA	NA	NA	NA	NA	NA	NA	NA	NA	NA	NA	hsa_circ_0067063	chr3	123512523	123595464	-	82941	350	NM_053025	MYLK
hsa_circ_0085671	6.9166	P	4.86501	P	4.14562	4.14562	up	circRNA	CTCCTTCAAGGTAACGAGTCTGACCTTGAACTAGAAAAGAAGTGTAAGGAAGATGATCGG	NA	circbase	NA	NA	NA	NA	NA	NA	NA	NA	NA	NA	NA	hsa_circ_0085671	chr8	135577575	135622898	-	45323	2528	NM_001029939	ZFAT
hsa_circ_0055491	4.26681	P	6.96588	P	0.153993	6.4938	down	circRNA	CTGATCAACATCGTAATTTCTATTAGAACCACTGTGTCTCTTGAAACAACAAATAGTCTC	NA	circbase	NA	NA	NA	NA	NA	NA	NA	NA	NA	NA	NA	hsa_circ_0055491	chr2	86348601	86359547	+	10946	835	NM_017952	PTCD3
hsa_circ_0082406	4.78918	P	6.6067	P	0.283709	3.52474	down	circRNA	GAGGCCATCAGATGGTTATTGATGTTCAAACAGTGGCTTAAAGAATGATTATAACAAAGA	NA	circbase	NA	NA	NA	NA	NA	NA	NA	NA	NA	NA	NA	hsa_circ_0082406	chr7	131073642	131099469	+	25827	536	NM_001145354	MKLN1
hsa_circ_0057558	3.36928	P	1.45693	A	3.76422	3.76422	up	circRNA	GGTGGATATGCCTGGATTTGTGGTATCATTTCTATCACTGTCATTAGCCTGCTTTCCTTG	NA	circbase	NA	NA	NA	NA	NA	NA	NA	NA	NA	NA	NA	hsa_circ_0057558	chr2	196571339	196593073	+	21734	1121	NM_001127257	SLC39A10
hsa_circ_0057563	2.25671	A	3.66083	P	0.377849	2.64656	down	circRNA	CATGAATTAGGAACTGATGACTCGGTTGTTTCTGAAGATCGACTTAATGAAACTGAACTG	NA	circbase	NA	NA	NA	NA	NA	NA	NA	NA	NA	NA	NA	hsa_circ_0057563	chr2	196581360	196583056	+	1696	450	NM_001127257	SLC39A10
hsa_circ_0007528	5.25065	P	6.37435	P	0.458915	2.17905	down	circRNA	TTGATATTGGGACAAGCCTCTTCCTTGGTTGTGCCACTACTGAGTTCTCCAGTTCTCTTT	NA	circbase	NA	NA	NA	NA	NA	NA	NA	NA	NA	NA	NA	hsa_circ_0007528	chr18	59739905	59763183	-	23278	595	NM_176787	PIGN
hsa_circ_0059683	3.01789	A	4.04255	P	0.491526	2.03448	down	circRNA	AACTGAACGGCCTCAAGGAATGGCACCATTGTTGTGCGGATGCTGATGCCCAGCGTTGAG	NA	circbase	NA	NA	NA	NA	NA	NA	NA	NA	NA	NA	NA	hsa_circ_0059683	chr20	25612793	25612924	+	131	131	---	---
hsa_circ_0057552	3.69575	P	1.26861	A	5.37824	5.37824	up	circRNA	CTGTCATGAACTGCCACATGAATTAGGAAAAATAGAAATGAAGGTACATATGCACACAAA	NA	circbase	NA	NA	NA	NA	NA	NA	NA	NA	NA	NA	NA	hsa_circ_0057552	chr2	196544755	196583056	+	38301	2157	NM_001127257	SLC39A10
hsa_circ_0056515	2.62387	A	3.73712	P	0.462253	2.16332	down	circRNA	AGCAGTTCTCCAGGCAACTACGGAGCCGCAGCCCAGGGAGCAAGTCTCCGCAAACTTGCT	NA	circbase	NA	NA	NA	NA	NA	NA	NA	NA	NA	NA	NA	hsa_circ_0056515	chr2	133887549	134326031	-	438482	715	NM_207363	NCKAP5
hsa_circ_0029930	3.44403	P	1.41466	A	4.08228	4.08228	up	circRNA	GTGCTCATAGGAAGGAATGTTCCCAATAGTAGACATAAAAGTCTTCGCACAGTGAAAACT	NA	circbase	NA	NA	NA	NA	NA	NA	NA	NA	NA	NA	NA	hsa_circ_0029930	chr13	32899212	32900750	+	1538	315	NM_000059	BRCA2
hsa_circ_0055796	6.49988	P	8.67514	P	0.221401	4.51669	down	circRNA	TGCATGCGCAGGTGAATGGAGTGAGGCCCTTTACCCGCTGCTGACCACTCTCACCGACTG	NA	circbase	NA	NA	NA	NA	NA	NA	NA	NA	NA	NA	NA	hsa_circ_0055796	chr2	99179927	99193606	+	13679	931	NM_001134224	INPP4A
hsa_circ_0014444	3.75524	P	2.61701	A	2.20112	2.20112	up	circRNA	CTTAAAGTTCAAAAAAAATAACCGTGTGAGTACTATTCCATAGAATGAATGTTTCATAAT	NA	circbase	NA	NA	NA	NA	NA	NA	NA	NA	NA	NA	NA	hsa_circ_0014444	chr1	154574679	154578494	-	3815	436	NM_001193495	ADAR
hsa_circ_0032882	2.60639	A	3.99522	P	0.381872	2.61868	down	circRNA	ATGTTGTCTATGGCTCCTGGTCATACAGATAGACCTTGCATTGCATCCTGAACGAGTGTT	NA	circbase	NA	NA	NA	NA	NA	NA	NA	NA	NA	NA	NA	hsa_circ_0032882	chr14	89212528	89221015	-	8487	259	NM_183387	EML5
hsa_circ_0081571	6.48775	P	10.6766	M	0.0548323	18.2374	down	circRNA	GATCATCATGGACAGACCCTTCCTCTTTGTGGTCCGGCACAACCCCACAGCTGAGTTCAC	NA	circbase	NA	NA	NA	NA	NA	NA	NA	NA	NA	NA	NA	hsa_circ_0081571	chr7	100776975	100780365	+	3390	471	NM_000602	SERPINE1
hsa_circ_0062687	2.73326	A	4.71882	P	0.252514	3.96018	down	circRNA	CAAGTTGAACCAGCATTGTAACGAATGAATATATGAAAGATGATTTCTTCATTAAAATCG	NA	circbase	NA	NA	NA	NA	NA	NA	NA	NA	NA	NA	NA	hsa_circ_0062687	chr22	28290542	28293125	-	2583	167	NM_012399	PITPNB
hsa_circ_0007217	3.90575	P	1.09117	A	7.03517	7.03517	up	circRNA	ACTGTATCGTCAGCGTCAACTATGTCCTCACGGCTCGGCGAGGCGTGGGGCCACTCAAGT	NA	circbase	NA	NA	NA	NA	NA	NA	NA	NA	NA	NA	NA	hsa_circ_0007217	chr6	100895143	100901720	-	6577	823	NM_005068	SIM1
hsa_circ_0052161	7.16091	P	4.91912	P	4.72984	4.72984	up	circRNA	TGATCAAAACTGACTCCCACTCAGACTCCGACAGCTCCTACTCAGGGAATGAGTGTCACC	NA	circbase	NA	NA	NA	NA	NA	NA	NA	NA	NA	NA	NA	hsa_circ_0052161	chr19	54967503	54969700	+	2197	936	NM_052925	LENG8
hsa_circ_0068411	3.18258	A	4.27939	P	0.467549	2.13881	down	circRNA	AGACCAAACTGGTAGATATCCATAGAAAAGAGAACTCTGGAGCTGCAGAGAAGCCTGTCA	NA	circbase	NA	NA	NA	NA	NA	NA	NA	NA	NA	NA	NA	hsa_circ_0068411	chr3	185404844	185404979	-	135	135	NM_006548	IGF2BP2
hsa_circ_0014220	11.7601	P	9.7047	P	4.15663	4.15663	up	circRNA	GGCCAAATAAAGTCTCTTCCTCCAAGTCAACAGAGTGCAAGACGATGACTTGCAAAATGT	NA	circbase	NA	NA	NA	NA	NA	NA	NA	NA	NA	NA	NA	hsa_circ_0014220	chr1	153330744	153333503	+	2759	549	NM_002965	S100A9
hsa_circ_0061359	4.01975	P	2.8609	A	2.23279	2.23279	up	circRNA	ATATCAACAGGACTGTTGGCTTCATGTAAATGCAAAAAAGAGTGTGTTTCCCAAGCTATC	NA	circbase	NA	NA	NA	NA	NA	NA	NA	NA	NA	NA	NA	hsa_circ_0061359	chr21	30330707	30343064	-	12357	1763	NM_015565	LTN1
hsa_circ_0040961	6.72973	P	3.96695	P	6.78702	6.78702	up	circRNA	TTTTATTGAGCCAGCCCAAAAGTGGCTTCTGCAAGTCGTGATGAGAGTGTCTGTTGATGT	NA	circbase	NA	NA	NA	NA	NA	NA	NA	NA	NA	NA	NA	hsa_circ_0040961	chr16	89645264	89645404	+	140	140	NM_014427	CPNE7
hsa_circ_0065355	2.0096	A	3.49727	P	0.356588	2.80435	down	circRNA	AAAGAAGTGATGCTGGAAAATCTCAGGAATCTGGTCTCATTGGGGACCAGTGACTTTCGA	NA	circbase	NA	NA	NA	NA	NA	NA	NA	NA	NA	NA	NA	hsa_circ_0065355	chr3	48302302	48302429	+	127	127	NM_016089	ZNF589
hsa_circ_0014821	6.87108	P	5.5774	P	2.45152	2.45152	up	circRNA	ACCGGTGACCAGGTTAAGTAGCCTGTCTTCTCTGGGAGATTCTGCACCAGAGCGCAAGTC	NA	circbase	NA	NA	NA	NA	NA	NA	NA	NA	NA	NA	NA	hsa_circ_0014821	chr1	156937778	156955965	-	18187	931	NM_198236	ARHGEF11
hsa_circ_0041482	1.89379	A	4.00541	P	0.231387	4.32176	down	circRNA	ATGCTGTTTTCTGAACGCAACGCCGAGAGTGCCATCGAGGCCCTGAAGGAGTATGAGCCT	NA	circbase	NA	NA	NA	NA	NA	NA	NA	NA	NA	NA	NA	hsa_circ_0041482	chr17	3853804	3854683	-	879	306	NM_174953	ATP2A3
hsa_circ_0049425	2.10474	A	3.80211	P	0.308348	3.24309	down	circRNA	CTTCACCATGGTTCGAGATTGAAATTGAGCCCATCTTTGGGATCTTGGCTCTGTATGATG	NA	circbase	NA	NA	NA	NA	NA	NA	NA	NA	NA	NA	NA	hsa_circ_0049425	chr19	11319361	11356554	-	37193	4282	NM_020812	DOCK6
hsa_circ_0080108	1.83187	A	4.30572	P	0.180009	5.55527	down	circRNA	TGTCCCTTCAGCAATGTCAAAGCTGGGCTTGCGGCAGATTCAGGGAGTCACCAGGATCAC	NA	circbase	NA	NA	NA	NA	NA	NA	NA	NA	NA	NA	NA	hsa_circ_0080108	chr7	45120035	45120862	-	827	504	NM_001146334	NACAD
hsa_circ_0004247	3.80924	P	2.5406	A	2.40935	2.40935	up	circRNA	TTTATCAAAGGAAAGATGGATCCAGACAAGTCATTCCTACACTGGCCAAGATTACAGTAC	NA	circbase	NA	NA	NA	NA	NA	NA	NA	NA	NA	NA	NA	hsa_circ_0004247	chr6	57393111	57398317	+	5206	259	NM_000947	PRIM2
hsa_circ_0000125	8.49218	P	7.30261	P	2.28084	2.28084	up	circRNA	GCTAGAACTGGAATATATATGTCCCAGATGTGAATCAGGCTTTATTGAAGAAGTGACAGA	NA	circbase	NA	NA	NA	NA	NA	NA	NA	NA	NA	NA	NA	hsa_circ_0000125	chr1	145646114	145687091	+	40977	681	NM_014455	RNF115
hsa_circ_0014721	4.9413	P	6.05266	P	0.46286	2.16048	down	circRNA	AGAAAATAAGTTAGGTCTAGCTTTATATTCTTGGCCCATCCCTTAGTAGCGGTAATTTAA	NA	circbase	NA	NA	NA	NA	NA	NA	NA	NA	NA	NA	NA	hsa_circ_0014721	chr1	156294762	156307580	-	12818	504	NR_036565	CCT3
hsa_circ_0031974	3.5414	P	2.41112	A	2.18902	2.18902	up	circRNA	TAGAGATGAAACACTGTTGATTCCATTACTCCTGACAAAGTACGAGGTTTAAGGGATATG	NA	circbase	NA	NA	NA	NA	NA	NA	NA	NA	NA	NA	NA	hsa_circ_0031974	chr14	53539314	53539421	-	107	107	NM_001160148	DDHD1
hsa_circ_0023387	5.67932	P	6.8091	P	0.456986	2.18825	down	circRNA	ATTTCATCTCGAAACCTGGCGGAAACCGTACCCTTCGGAGATGCGGTGCTGGTGACATGG	NA	circbase	NA	NA	NA	NA	NA	NA	NA	NA	NA	NA	NA	hsa_circ_0023387	chr11	71184323	71189515	+	5192	414	NM_018161	NADSYN1
hsa_circ_0086263	6.60075	P	4.80909	P	3.46214	3.46214	up	circRNA	AAAGCTTGTGGCAAATGTTCTGAAAAAGACTCTGCATGGGAATGGCCTGCCTTACGATGA	NA	circbase	NA	NA	NA	NA	NA	NA	NA	NA	NA	NA	NA	hsa_circ_0086263	chr9	5021962	5022213	+	251	251	NM_004972	JAK2
hsa_circ_0049647	11.3804	P	12.4212	P	0.486073	2.0573	down	circRNA	CGTAACAAAGGACTGGGACAAGCCCGAGCATATCCCTGACCCTGATGCTAAGAAGCCCGA	NA	circbase	NA	NA	NA	NA	NA	NA	NA	NA	NA	NA	NA	hsa_circ_0049647	chr19	13051354	13054443	+	3089	351	NM_004343	CALR
hsa_circ_0078732	3.86142	P	2.80467	A	2.08024	2.08024	up	circRNA	GGACAGACACGTGTGAGCGCCACTTTGAAGGGCATCCAACCCGCGGCTATCCATGTGGAA	NA	circbase	NA	NA	NA	NA	NA	NA	NA	NA	NA	NA	NA	hsa_circ_0078732	chr6	170002314	170002417	-	103	103	NM_182552	WDR27
hsa_circ_0030463	5.4213	P	6.68602	P	0.416178	2.40282	down	circRNA	CAATAAAACCACTGTACATTTTTATACAGTGATAAAGTCTACGGCGGCAGTGGCGGCACC	NA	circbase	NA	NA	NA	NA	NA	NA	NA	NA	NA	NA	NA	hsa_circ_0030463	chr13	77618791	77901177	-	282386	15025	NM_015057	MYCBP2
hsa_circ_0023372	7.87552	P	9.77964	M	0.267178	3.74282	down	circRNA	TACACGCTGCAGGGAGGTGGACTGGTTTTCACTGGCGAGCGTCATCTTCCTACTGCTGTT	NA	circbase	NA	NA	NA	NA	NA	NA	NA	NA	NA	NA	NA	hsa_circ_0023372	chr11	71148857	71155261	-	6404	865	NM_001360	DHCR7
hsa_circ_0068016	1.8785	A	4.29908	P	0.186781	5.35387	down	circRNA	TTGTACACAAGGAGAAAAATTCAGGAAGAGATGCCTCAGATTGAAACAAGAGTGATATTG	NA	circbase	NA	NA	NA	NA	NA	NA	NA	NA	NA	NA	NA	hsa_circ_0068016	chr3	172473084	172478053	+	4969	461	NM_018098	ECT2
hsa_circ_0012390	5.03338	P	3.14176	A	3.71052	3.71052	up	circRNA	TTTGAAAGTGGCAATGATATGGGAAATGATGATGCCATTGGAGGGAATGTGAGCAAATAT	NA	circbase	NA	NA	NA	NA	NA	NA	NA	NA	NA	NA	NA	hsa_circ_0012390	chr1	50317067	50317190	-	123	123	NM_032785	AGBL4
hsa_circ_0068269	5.66522	P	10.5493	M	0.033865	29.529	down	circRNA	ATATGTTGTTACAGACTTGCCTGCCGCCTCACTAACTGGGCGCTGGGCCTGGAGGCGGTG	NA	circbase	NA	NA	NA	NA	NA	NA	NA	NA	NA	NA	NA	hsa_circ_0068269	chr3	183874562	183884053	+	9491	7624	NM_004423	DVL3
hsa_circ_0049641	11.301	P	12.3325	P	0.489175	2.04426	down	circRNA	CGTAACAAAGGTTTGCAGACAAGCCAGGATGCACGCTTTTATGCTCTGTCGGCCAGTTTC	NA	circbase	NA	NA	NA	NA	NA	NA	NA	NA	NA	NA	NA	hsa_circ_0049641	chr19	13050241	13054443	+	4202	860	NM_004343	CALR
hsa_circ_0036128	5.10825	P	3.52287	P	3.00085	3.00085	up	circRNA	CCTGAAGTTGGACTTGAACGCAACTCCCAATTGCAGAAAATTGGCAACGTCTCTGAAGAG	NA	circbase	NA	NA	NA	NA	NA	NA	NA	NA	NA	NA	NA	hsa_circ_0036128	chr15	71433787	72063547	+	629760	2993	NM_024817	THSD4
hsa_circ_0018139	3.95648	P	2.79215	A	2.24129	2.24129	up	circRNA	TTGAAAAGAGATTTTGGAATCTCTTTTTAAGTGGTTTCAGTGGCAGGTCAATCAGATGGA	NA	circbase	NA	NA	NA	NA	NA	NA	NA	NA	NA	NA	NA	hsa_circ_0018139	chr10	32751610	32860821	+	109211	998	NM_145023	CCDC7
hsa_circ_0057485	5.27071	P	4.03355	P	2.35733	2.35733	up	circRNA	GTTAGAGCTGTTGTTTTTCAGCCAATACTGTGGAAGAAATTATTGAAAACTTACAGCAAG	NA	circbase	NA	NA	NA	NA	NA	NA	NA	NA	NA	NA	NA	hsa_circ_0057485	chr2	191073605	191109694	-	36089	236	NM_014362	HIBCH
hsa_circ_0042477	3.36234	P	2.1542	A	2.3104	2.3104	up	circRNA	CTAACGAAAGGCGTACACGTCACTTCCGAGGCGGGAGGATGAAGTTGATTGACTATGGTC	NA	circbase	NA	NA	NA	NA	NA	NA	NA	NA	NA	NA	NA	hsa_circ_0042477	chr17	21030240	21087123	+	56883	570	NM_015510	DHRS7B
hsa_circ_0019696	2.54585	A	3.8246	P	0.412154	2.42628	down	circRNA	GTCATCTAAAGGAGGTTTTAAACAGTATAACAGGTTTGCCAAGATGGTGGATAAGAATAT	NA	circbase	NA	NA	NA	NA	NA	NA	NA	NA	NA	NA	NA	hsa_circ_0019696	chr10	104018685	104019873	+	1188	173	NM_004193	GBF1
hsa_circ_0077959	3.70609	P	2.44921	A	2.38979	2.38979	up	circRNA	AGACTCTCAACAGGGGCTGAAGAACCGAAACTAAAATGGGAACACATCACAACCCTCATT	NA	circbase	NA	NA	NA	NA	NA	NA	NA	NA	NA	NA	NA	hsa_circ_0077959	chr6	136878186	136904878	-	26692	1609	NM_005923	MAP3K5
hsa_circ_0034688	5.78774	P	4.12444	P	3.1674	3.1674	up	circRNA	TAATATACAACTATCTCTTAAAAACAAAAGCCATAGTAAATGCATCAGAGATGGATATTC	NA	circbase	NA	NA	NA	NA	NA	NA	NA	NA	NA	NA	NA	hsa_circ_0034688	chr15	41601465	41605552	-	4087	664	NM_007280	OIP5
hsa_circ_0040502	4.18836	P	2.67006	A	2.86452	2.86452	up	circRNA	TGCATTGATGAAACAGAATAGTGAGGCAGACTTTCAATAAGGAGATCAAAACCATGAAGA	NA	circbase	NA	NA	NA	NA	NA	NA	NA	NA	NA	NA	NA	hsa_circ_0040502	chr16	74719383	74719481	-	98	98	NM_152649	MLKL
hsa_circ_0076501	3.6758	P	2.66633	A	2.01318	2.01318	up	circRNA	TCCAAGCCCAGGTCAGAACCATCCAGTCCTGGACATGGGACCACATCGGCGACTGCAGTG	NA	circbase	NA	NA	NA	NA	NA	NA	NA	NA	NA	NA	NA	hsa_circ_0076501	chr6	43180886	43183064	+	2178	724	NM_015089	CUL9
hsa_circ_0035062	7.26571	P	4.79484	P	5.5438	5.5438	up	circRNA	ATTGATTCCATTCCTGGAGAAGCTTGTAGAACTGGAACGTCAGGATCAGATTCTCCAGGA	NA	circbase	NA	NA	NA	NA	NA	NA	NA	NA	NA	NA	NA	hsa_circ_0035062	chr15	44782981	44813604	+	30623	860	NM_016396	CTDSPL2
hsa_circ_0015827	5.33791	P	4.21245	P	2.1817	2.1817	up	circRNA	ATGATCATTGCTGAGAGTGAGGGAACATCCTGTTTATGGACCATATGTTGAAGCACTGTC	NA	circbase	NA	NA	NA	NA	NA	NA	NA	NA	NA	NA	NA	hsa_circ_0015827	chr1	200567364	200575926	-	8562	995	NM_014875	KIF14
hsa_circ_0084342	1.21818	A	3.59764	P	0.192181	5.20344	down	circRNA	TCGTTCAAGTCATGAGACATATTTTAGAAAAAGTATATGAGCTCCTAGGATTATTGGGTG	NA	circbase	NA	NA	NA	NA	NA	NA	NA	NA	NA	NA	NA	hsa_circ_0084342	chr8	48761714	48866479	-	104765	6771	NM_006904	PRKDC
hsa_circ_0026937	5.73113	P	6.73494	P	0.498682	2.00529	down	circRNA	ACTGTGCAGTGCAGCGAGATTGATTGTGCCGACAAATTTGGGAACACGCCACTGCATGTG	NA	circbase	NA	NA	NA	NA	NA	NA	NA	NA	NA	NA	NA	hsa_circ_0026937	chr12	56638886	56647186	-	8300	1507	NM_173595	ANKRD52
hsa_circ_0023309	4.38634	P	2.96171	A	2.68445	2.68445	up	circRNA	GACCTCACGGGCTTTGAAGAGGAAGAGCTGCCACCTTCATGGAGCACTGGAAGCGGAAAC	NA	circbase	NA	NA	NA	NA	NA	NA	NA	NA	NA	NA	NA	hsa_circ_0023309	chr11	69995815	69995898	+	83	83	NM_018043	ANO1
hsa_circ_0058817	4.47413	P	1.09966	A	10.3709	10.3709	up	circRNA	TTCAGTACAAGGAGAAAGAGGATTCCCTGGATACCCAGGACCAAAGGGTAACCCAGGTGA	NA	circbase	NA	NA	NA	NA	NA	NA	NA	NA	NA	NA	NA	hsa_circ_0058817	chr2	238243268	238257027	-	13759	2299	NM_004369	COL6A3
hsa_circ_0077960	4.14967	P	1.12338	A	8.14709	8.14709	up	circRNA	ACTCTCAACACTCTTTCAGCTGGATCAAATGAATATCTCAGGAGTATATCCTTGCCGGTA	NA	circbase	NA	NA	NA	NA	NA	NA	NA	NA	NA	NA	NA	hsa_circ_0077960	chr6	136878186	136922180	-	43994	1977	NM_005923	MAP3K5
hsa_circ_0062235	7.4296	P	9.74113	M	0.201447	4.96409	down	circRNA	ATCCTGGCAGTGACGTGGTGTGTGTCGCCTGTGAAAAAAGGATGCTGTCAGTGTTCTCCA	NA	circbase	NA	NA	NA	NA	NA	NA	NA	NA	NA	NA	NA	hsa_circ_0062235	chr22	19343752	19344574	-	822	221	NM_003325	HIRA
hsa_circ_0009010	3.26299	P	1.9537	A	2.47819	2.47819	up	circRNA	ATCTATCCATATGAGTGCTACTCATTGAGTTTCCTTGTGAGGAGATTGTGTGGCGAGGAC	NA	circbase	NA	NA	NA	NA	NA	NA	NA	NA	NA	NA	NA	hsa_circ_0009010	chr12	11199618	11276786	-	77168	77168	NR_037918	PRH1-PRR4
hsa_circ_0001371	2.65357	A	4.31048	P	0.317119	3.15339	down	circRNA	ATTAATCACTGCAAAAAGACTGTTAAAGATTCACTCCAGTCAGTCCAGTCCGCAGCAGGC	NA	circbase	NA	NA	NA	NA	NA	NA	NA	NA	NA	NA	NA	hsa_circ_0001371	chr3	183515710	183519316	+	3606	405	NM_018023	YEATS2
hsa_circ_0072343	2.3811	A	3.6037	P	0.428509	2.33367	down	circRNA	AACAAGATCAATGTCTTCAGCCAATGACTTGCTTGCATCAGACATCTTTGCTCCTCCCGT	NA	circbase	NA	NA	NA	NA	NA	NA	NA	NA	NA	NA	NA	hsa_circ_0072343	chr5	39376751	39381718	-	4967	796	NM_001343	DAB2
hsa_circ_0090946	5.80283	P	3.85393	P	3.86078	3.86078	up	circRNA	TCAGTCAGTGAAAAGGAACAGCAGCTGCTGAGCACACTGAAGTGTCAGGATATAATGCAA	NA	circbase	NA	NA	NA	NA	NA	NA	NA	NA	NA	NA	NA	hsa_circ_0090946	chrX	69516847	69624672	+	107825	2663	NM_012310	KIF4A
hsa_circ_0042406	4.12819	P	2.75499	A	2.59045	2.59045	up	circRNA	GATGTACATGCGAAAGGGACTCTCAGTGAAGACACGATCAGAGTGTTTCTGCATCAGATT	NA	circbase	NA	NA	NA	NA	NA	NA	NA	NA	NA	NA	NA	hsa_circ_0042406	chr17	19748616	19750223	-	1607	248	NM_014683	ULK2
hsa_circ_0049646	10.1435	P	11.2706	P	0.457838	2.18418	down	circRNA	ATTTTGTGTCTCCGATGATGAGTTTACACACCTGTACACACTGATTGTGCGGCCAGACAA	NA	circbase	NA	NA	NA	NA	NA	NA	NA	NA	NA	NA	NA	hsa_circ_0049646	chr19	13051056	13055304	+	4248	1339	NM_004343	CALR
hsa_circ_0063943	3.60592	P	1.9333	A	3.18794	3.18794	up	circRNA	TGCCGACCAGGACGACAACATCAAGTAAAGAGATTATAAATCTTCCACTGAATGAAAAAA	NA	circbase	NA	NA	NA	NA	NA	NA	NA	NA	NA	NA	NA	hsa_circ_0063943	chr22	50810448	50876032	+	65584	1928	NM_001242898	PPP6R2
hsa_circ_0000352	3.68962	P	5.88237	P	0.218734	4.57176	down	circRNA	CTGTCTCCAGATTCCCAACACCTGAGTCCACCATCACAGCAAAAGCATTTGACATCATCA	NA	circbase	NA	NA	NA	NA	NA	NA	NA	NA	NA	NA	NA	hsa_circ_0000352	chr11	102195835	102196253	-	418	418	NM_182962	BIRC3
hsa_circ_0087016	3.70177	P	5.18586	P	0.357475	2.7974	down	circRNA	AGATGTAGAAGATGGAGAAGTAGAAAATTACGAGATATCTCCCGGGGCCAATTCAGCATC	NA	circbase	NA	NA	NA	NA	NA	NA	NA	NA	NA	NA	NA	hsa_circ_0087016	chr9	36351111	36390613	-	39502	1251	NM_194328	RNF38
hsa_circ_0061715	5.32312	P	3.63556	P	3.22111	3.22111	up	circRNA	AGAAAAACTGTTGATCCACCTGAAGAATTAGGAGCTAGTATTTCTGTCACAACAGATGAG	NA	circbase	NA	NA	NA	NA	NA	NA	NA	NA	NA	NA	NA	hsa_circ_0061715	chr21	40572144	40590586	-	18442	1371	NM_033656	BRWD1
hsa_circ_0012012	3.5829	P	5.05726	P	0.359893	2.7786	down	circRNA	TGAGTGAGAAGCAGGGCGAGGAGACCATCCTGCAGTTCAGCTCAGGGACCTTGACACTTA	NA	circbase	NA	NA	NA	NA	NA	NA	NA	NA	NA	NA	NA	hsa_circ_0012012	chr1	43782869	43783743	+	874	513	NM_005424	TIE1
hsa_circ_0035278	3.83034	P	1.31827	A	5.70439	5.70439	up	circRNA	TGTTGCAAAGGCACATACTGCAATTCTGCAAGTGCTTGCTTTGTTGCTTCTGATGGCAAA	NA	circbase	NA	NA	NA	NA	NA	NA	NA	NA	NA	NA	NA	hsa_circ_0035278	chr15	51763419	51827981	-	64562	5078	NM_001174116	DMXL2
hsa_circ_0054094	4.50081	P	1.23297	A	9.63205	9.63205	up	circRNA	GGCTTTGTTACCTCCAAAAACTTATGAAGACCGATGTAAAGGAAAAACAGAAAAAACTTG	NA	circbase	NA	NA	NA	NA	NA	NA	NA	NA	NA	NA	NA	hsa_circ_0054094	chr2	37285593	37306474	-	20881	1933	NM_019024	HEATR5B
hsa_circ_0005512	1.69742	A	4.546	P	0.138833	7.2029	down	circRNA	CAACTATGACAAGTGATTATTTTTCTGTTGCCCACTTTTCAATATGAAGGAGGATCAAGT	NA	circbase	NA	NA	NA	NA	NA	NA	NA	NA	NA	NA	NA	hsa_circ_0005512	chr22	38933596	38964294	-	30698	869	NM_007068	DMC1
hsa_circ_0080790	3.42958	P	2.22835	A	2.29935	2.29935	up	circRNA	AATAAACTTACAGATCTGACGCCAGTGAGGGGGTTGTCCGTCAGTGGCACGCACAGCAGC	NA	circbase	NA	NA	NA	NA	NA	NA	NA	NA	NA	NA	NA	hsa_circ_0080790	chr7	75956107	75988342	-	32235	3747	NM_012479	YWHAG
hsa_circ_0034397	1.19726	A	5.94687	P	0.0371729	26.9013	down	circRNA	TACAGGAACACGAGGAAACTCCACAAGCCAAGCTAGGGCACTCTGGTGTACAGCCAGTCC	NA	circbase	NA	NA	NA	NA	NA	NA	NA	NA	NA	NA	NA	hsa_circ_0034397	chr15	36871811	36950106	+	78295	596	NM_001130010	C15orf41
hsa_circ_0022339	3.34179	A	4.47149	P	0.45701	2.18813	down	circRNA	TACAACCAAGGGGAGATGAGTTCCTACCTGTGTTGGCCAGAGGCTCCAAGCGGGAAACAG	NA	circbase	NA	NA	NA	NA	NA	NA	NA	NA	NA	NA	NA	hsa_circ_0022339	chr11	61253995	61254712	+	717	296	NM_145017	PPP1R32
hsa_circ_0041775	2.72032	A	3.95618	P	0.42459	2.35521	down	circRNA	TAAAACACCAAATAAAGCAATAGAGGCAAACTCCTGGTGTCCTCAGATAATCCCCAACCC	NA	circbase	NA	NA	NA	NA	NA	NA	NA	NA	NA	NA	NA	hsa_circ_0041775	chr17	7128660	7133749	-	5089	2470	NM_004422	DVL2
hsa_circ_0091645	3.65643	P	2.51299	A	2.20906	2.20906	up	circRNA	ATGATTGATAGTGGATTATGTATTTACAGATAAGACTGGAACACTCACTGAAAACAGCAT	NA	circbase	NA	NA	NA	NA	NA	NA	NA	NA	NA	NA	NA	hsa_circ_0091645	chrX	138808504	138871647	-	63143	4804	NM_173694	ATP11C
hsa_circ_0058366	5.49782	P	6.8614	P	0.388615	2.57324	down	circRNA	ATCGACATGGTCCTGAACCGCATGGCAAAAGATGGCTTGTTTGGGCAGTGCCAGGTGGGA	NA	circbase	NA	NA	NA	NA	NA	NA	NA	NA	NA	NA	NA	hsa_circ_0058366	chr2	220155547	220172279	-	16732	2628	NM_002846	PTPRN
hsa_circ_0072901	4.38133	P	3.01836	A	2.57215	2.57215	up	circRNA	GTGACATGAGTATACACCAACAAGTATTCCAGAAGTCCAACAAGAGAATATAATCAATCC	NA	circbase	NA	NA	NA	NA	NA	NA	NA	NA	NA	NA	NA	hsa_circ_0072901	chr5	70844508	70845433	+	925	251	NM_018429	BDP1
hsa_circ_0009562	3.73786	P	2.07408	A	3.16846	3.16846	up	circRNA	CATAAATAAAACCAAGCTACACTACAAGGGGAGCTGATCACCTTCTATTACTATTGGAAG	NA	circbase	NA	NA	NA	NA	NA	NA	NA	NA	NA	NA	NA	hsa_circ_0009562	chr1	8412463	8426034	-	13571	6100	NM_012102	RERE
hsa_circ_0061352	1.11582	A	5.45679	P	0.0493445	20.2657	down	circRNA	TCTTCGTTTTGCAGCCCAAGGAACTGGAAGCATAAGAAAGAAGCGATTTGTGTCCAGTCA	NA	circbase	NA	NA	NA	NA	NA	NA	NA	NA	NA	NA	NA	hsa_circ_0061352	chr21	28211905	28215004	-	3099	1298	NM_006988	ADAMTS1
hsa_circ_0027209	4.27184	P	6.00855	P	0.300053	3.33274	down	circRNA	CAGCCAGACGGTGAACTCTCTCCATGCCGAATCAACAACGGTGGCTGCCAGGACCTGTGT	NA	circbase	NA	NA	NA	NA	NA	NA	NA	NA	NA	NA	NA	hsa_circ_0027209	chr12	57586627	57593183	+	6556	2436	NM_002332	LRP1
hsa_circ_0057931	3.62782	P	2.33034	A	2.458	2.458	up	circRNA	TATCATTGTCAAGAGAGCAGCATTTGTTCAGTGCTCAGCACAGGAGTTTGACCAGACAGA	NA	circbase	NA	NA	NA	NA	NA	NA	NA	NA	NA	NA	NA	hsa_circ_0057931	chr2	207161969	207162097	+	128	128	NM_020923	ZDBF2
hsa_circ_0002186	6.83008	P	8.71249	P	0.27123	3.68691	down	circRNA	GAGCTTTCAGCCTCCACCAGGCGGTGTGAAGATGCCTAATGTACCCAATACACAACCAGC	NA	circbase	NA	NA	NA	NA	NA	NA	NA	NA	NA	NA	NA	hsa_circ_0002186	chr5	77711343	77717784	+	6441	497	NM_004866	SCAMP1
hsa_circ_0084990	5.67287	P	4.50617	P	2.24498	2.24498	up	circRNA	TTTTAAATAAAAACGATTCACTTTAAAGCCTACCTACTCGGAGTGTGAAGATGGCACCTA	NA	circbase	NA	NA	NA	NA	NA	NA	NA	NA	NA	NA	NA	hsa_circ_0084990	chr8	97343253	97346774	+	3521	1160	NM_014754	PTDSS1
hsa_circ_0051879	3.45521	P	5.01865	P	0.338343	2.95558	down	circRNA	GAGCCCATGGGCCTGGCTGGACACCCAGGACCGGTGCTTGGGCCACTATGTGAATGGGAA	NA	circbase	NA	NA	NA	NA	NA	NA	NA	NA	NA	NA	NA	hsa_circ_0051879	chr19	49961742	49963105	+	1363	409	NM_153329	ALDH16A1
hsa_circ_0056360	3.42563	P	1.16046	A	4.8071	4.8071	up	circRNA	GACTCACTTTCAATTTTGAAACAATATTACAGTATCCTAGAAGGAAAACATCACCATGGC	NA	circbase	NA	NA	NA	NA	NA	NA	NA	NA	NA	NA	NA	hsa_circ_0056360	chr2	128522747	128528578	-	5831	497	NM_018383	WDR33
hsa_circ_0055001	4.07574	P	2.7432	A	2.51845	2.51845	up	circRNA	AGTGAGCAAGCCCTCTTGGAACAGAGATCATGATGACACGGCATCTACTCGTTCAGGAGG	NA	circbase	NA	NA	NA	NA	NA	NA	NA	NA	NA	NA	NA	hsa_circ_0055001	chr2	66691240	66691352	+	112	112	NM_002398	MEIS1
hsa_circ_0070673	3.39275	P	2.01572	A	2.59734	2.59734	up	circRNA	GATGTACAAGGGTCACAAGCCAATTCTATTGAGAACTCAATACCGTTGTCATCCTGCAAT	NA	circbase	NA	NA	NA	NA	NA	NA	NA	NA	NA	NA	NA	hsa_circ_0070673	chr4	113461976	113462424	-	448	312	NM_018392	C4orf21
hsa_circ_0017431	3.85873	P	1.10643	A	6.73792	6.73792	up	circRNA	TATTTCTTGCAAAGTTAAGTTCCTCCAGAAGAAATTAATTATTTAACACGAATTCACTAC	NA	circbase	NA	NA	NA	NA	NA	NA	NA	NA	NA	NA	NA	hsa_circ_0017431	chr10	1085963	1087444	-	1481	1481	NM_004508	IDI1
hsa_circ_0013325	4.18701	P	3.16292	A	2.03368	2.03368	up	circRNA	ACATTATGAGGGATGCTTCCTTTGGAAATTGCACTTACAATCTCACCATTCTCGACTGTT	NA	circbase	NA	NA	NA	NA	NA	NA	NA	NA	NA	NA	NA	hsa_circ_0013325	chr1	100905487	100908552	+	3065	130	NM_003672	CDC14A
hsa_circ_0038491	4.82238	P	1.96151	A	7.26452	7.26452	up	circRNA	CCGAGAACATCCCTTCGGCCGAGGAGCAATGAGGGAGTGCTTCCGGACGAAGAAGCTCTC	NA	circbase	NA	NA	NA	NA	NA	NA	NA	NA	NA	NA	NA	hsa_circ_0038491	chr16	22261974	22274508	+	12534	969	NM_013302	EEF2K
hsa_circ_0035454	7.11551	P	8.16601	P	0.482802	2.07124	down	circRNA	GCACCTTCAGACTATCCCCATAAATACGGTCCTCAGGGGGGCTGTGCAGATCATTCAGTA	NA	circbase	NA	NA	NA	NA	NA	NA	NA	NA	NA	NA	NA	hsa_circ_0035454	chr15	58932975	58957396	-	24421	528	NM_001110	ADAM10
hsa_circ_0049651	10.6968	P	11.8625	P	0.445774	2.24329	down	circRNA	CGTGGGGCGTAACAAAGGTCAAGTCTGGCACCATCTTTGACAACTTCCTCATCACCAACG	NA	circbase	NA	NA	NA	NA	NA	NA	NA	NA	NA	NA	NA	hsa_circ_0049651	chr19	13054350	13054443	+	93	93	NM_004343	CALR
hsa_circ_0042770	1.51682	A	3.82486	P	0.201935	4.9521	down	circRNA	CCGGAGGGCACTCTTAGAACAAAAGTCTAAAGAACTCCAAATAAAAAAGCAGTTTCAGGA	NA	circbase	NA	NA	NA	NA	NA	NA	NA	NA	NA	NA	NA	hsa_circ_0042770	chr17	27857424	27861318	+	3894	396	NM_020791	TAOK1
hsa_circ_0091128	3.48423	P	2.23132	A	2.38322	2.38322	up	circRNA	GTGTTGTAAAATATCTCCCTGGACAATCAAGAAGCTACTATTGTTTATCAACCTCATCTT	NA	circbase	NA	NA	NA	NA	NA	NA	NA	NA	NA	NA	NA	hsa_circ_0091128	chrX	77244728	77305892	+	61164	7718	NM_000052	ATP7A
hsa_circ_0002012	4.51632	P	5.61355	P	0.467413	2.13943	down	circRNA	TTCCCCACAGAACATGCTGATGTTCCAGCAGCCAGTCGAGGCTTTGGGCAATCCAACTCC	NA	circbase	NA	NA	NA	NA	NA	NA	NA	NA	NA	NA	NA	hsa_circ_0002012	chr14	55241651	55243258	+	1607	329	NM_015589	SAMD4A
hsa_circ_0008703	4.75845	P	6.36508	P	0.328366	3.04538	down	circRNA	TCTCAATCATGGGAAAACTGAGGCTGCCATCAAAAACTTCAGTCCCTACTACAGTCGTCA	NA	circbase	NA	NA	NA	NA	NA	NA	NA	NA	NA	NA	NA	hsa_circ_0008703	chr1	184853766	184868442	-	14676	546	NM_052966	FAM129A
hsa_circ_0049136	4.5144	P	2.94038	A	2.97735	2.97735	up	circRNA	AGCCCCACAACAACTGATGGAACGCTAGTGACCACCATAAAGATGTCAAGCCAGGCAGCA	NA	circbase	NA	NA	NA	NA	NA	NA	NA	NA	NA	NA	NA	hsa_circ_0049136	chr19	9024133	9080555	-	56422	27663	NM_024690	MUC16
hsa_circ_0071520	3.38814	P	5.65594	P	0.207647	4.81587	down	circRNA	ATTCAACTCCCCACGGTGTTCCAACGCCAAGCCAAGAAATTCTGCGGCACACGCTGAACA	NA	circbase	NA	NA	NA	NA	NA	NA	NA	NA	NA	NA	NA	hsa_circ_0071520	chr4	184930310	184932576	+	2266	2266	NM_020225	STOX2
hsa_circ_0067859	3.38696	A	4.41582	P	0.490096	2.04042	down	circRNA	GAGCAAGTGCACTTTGCATAAAAAAACTTTCTACTATCTGGAACAGTTAATTCTGAAATA	NA	circbase	NA	NA	NA	NA	NA	NA	NA	NA	NA	NA	NA	hsa_circ_0067859	chr3	160952909	160969795	+	16886	2123	NM_015938	NMD3
hsa_circ_0082423	6.8877	P	4.59195	P	4.9101	4.9101	up	circRNA	GAAGGACCAGGCAGGGGGCGCTTCGGATGAGAAATTGATCTCACTGATATGCCGAGCAGT	NA	circbase	NA	NA	NA	NA	NA	NA	NA	NA	NA	NA	NA	hsa_circ_0082423	chr7	131190626	131191485	-	859	378	NM_001018111	PODXL
hsa_circ_0027145	3.02777	A	4.47557	P	0.366579	2.72793	down	circRNA	CGCAGCCTGGGAAGGTGTTTTTCACTGACTATGGGCAGATCCCAAAGGTGGAACGCTGTG	NA	circbase	NA	NA	NA	NA	NA	NA	NA	NA	NA	NA	NA	hsa_circ_0027145	chr12	57548261	57569488	+	21227	2789	NM_002332	LRP1
hsa_circ_0055970	6.53271	P	5.13752	P	2.63023	2.63023	up	circRNA	ACCACAAGAAGCAGAACAAGCTACTGTAACCTCTGAATTCGAGAGCTACAAAGTCCGAGT	NA	circbase	NA	NA	NA	NA	NA	NA	NA	NA	NA	NA	NA	hsa_circ_0055970	chr2	109104154	109109246	+	5092	517	NM_181453	GCC2
hsa_circ_0041823	7.31369	P	5.47918	P	3.56651	3.56651	up	circRNA	AGTCTTTGAGGAGTGACTGCTATTCGGCCTGAAGACCTGGAATTCCCCAACACCATGACA	NA	circbase	NA	NA	NA	NA	NA	NA	NA	NA	NA	NA	NA	hsa_circ_0041823	chr17	7225183	7226882	-	1699	533	NM_032442	NEURL4
hsa_circ_0061307	1.16769	A	4.11262	P	0.129863	7.70042	down	circRNA	GACTTCCGTGATATCATTGTTATTGTTAATGCTCTTCTTCAAGTGACAATTTCACTTAGC	NA	circbase	NA	NA	NA	NA	NA	NA	NA	NA	NA	NA	NA	hsa_circ_0061307	chr21	22652897	22664561	+	11664	564	NM_004540	NCAM2
hsa_circ_0047886	5.54877	P	4.48769	P	2.08649	2.08649	up	circRNA	CACAGTATCAGTAAATTGGTCTGATCTTTCAGTCACAACAGTAACAAAAACCCACCAAGA	NA	circbase	NA	NA	NA	NA	NA	NA	NA	NA	NA	NA	NA	hsa_circ_0047886	chr18	60212034	60223530	+	11496	280	NM_017742	ZCCHC2
hsa_circ_0023300	12.8064	P	11.7037	P	2.14749	2.14749	up	circRNA	TATCAACTATAAATAAAACCAAGACTTCCGTTCTGGCTCTCAGTTACTGTCCCGCGAACC	NA	circbase	NA	NA	NA	NA	NA	NA	NA	NA	NA	NA	NA	hsa_circ_0023300	chr11	69061621	69064754	+	3133	2287	NM_138768	MYEOV
hsa_circ_0060926	5.93662	P	4.00066	P	3.82632	3.82632	up	circRNA	AATACGCCTCAGGTCTTGGCCGATTTTATGGGCAGAATAGATGAGCTCTGTGATGAAAGA	NA	circbase	NA	NA	NA	NA	NA	NA	NA	NA	NA	NA	NA	hsa_circ_0060926	chr20	52773707	52786227	-	12520	1012	NM_000782	CYP24A1
hsa_circ_0023858	3.7412	P	2.69132	A	2.07036	2.07036	up	circRNA	TAATATTACCAACAAAGCAGGGGAGAGACCCAGTGATGTGGCAAAGAGTGTCTTCATTGG	NA	circbase	NA	NA	NA	NA	NA	NA	NA	NA	NA	NA	NA	hsa_circ_0023858	chr11	82917099	82947551	+	30452	797	NM_182603	ANKRD42
hsa_circ_0025615	3.38343	P	2.03777	A	2.54146	2.54146	up	circRNA	TGAAGCTTTTGGATCGTATCCACAATCCTGGAATGGGAAGTGGTAGTGCTGGAAAAGAAG	NA	circbase	NA	NA	NA	NA	NA	NA	NA	NA	NA	NA	NA	hsa_circ_0025615	chr12	22659644	22666313	-	6669	195	NM_014802	KIAA0528
hsa_circ_0044168	3.88039	P	2.74651	A	2.19449	2.19449	up	circRNA	ACCATGGACAAGCTGCTGGCAGACAGCAAGACGGCTCAGTGTCCCTGGACAGTGTCCTGG	NA	circbase	NA	NA	NA	NA	NA	NA	NA	NA	NA	NA	NA	hsa_circ_0044168	chr17	43322619	43322783	+	164	164	NM_005892	FMNL1
hsa_circ_0073500	4.50633	P	2.51456	A	3.97725	3.97725	up	circRNA	ATGTACATTCTTTGCTGTCTATTCTTCGCTATGGTGCCTTATGCAATGAGACCCGAGGAG	NA	circbase	NA	NA	NA	NA	NA	NA	NA	NA	NA	NA	NA	hsa_circ_0073500	chr5	102455957	102509676	+	53719	11865	NM_015216	PPIP5K2
hsa_circ_0062657	3.83672	P	2.55846	A	2.42548	2.42548	up	circRNA	AAACTCTGCTTCATCCTGGATCTGATGAACGGACTGTCCTTTCATTGTATGTATGACCTA	NA	circbase	NA	NA	NA	NA	NA	NA	NA	NA	NA	NA	NA	hsa_circ_0062657	chr22	26081136	26081215	+	79	79	NM_005160	ADRBK2
hsa_circ_0085810	6.42101	P	4.90778	P	2.8545	2.8545	up	circRNA	TTAATAAAACACTGAAACTTCCTCCAGTGATTCACGCCCGCCTGGAGAAGAATCAGAGCT	NA	circbase	NA	NA	NA	NA	NA	NA	NA	NA	NA	NA	NA	hsa_circ_0085810	chr8	143692409	143693613	-	1204	954	NM_015193	ARC
hsa_circ_0057430	2.96749	A	4.29492	P	0.398478	2.50955	down	circRNA	AATGATGGTACCCCAGGACGGGATGGTGCTGTTGGAGAACGTGGTCTTCCAGGTCCTTTG	NA	circbase	NA	NA	NA	NA	NA	NA	NA	NA	NA	NA	NA	hsa_circ_0057430	chr2	189912934	189918938	-	6004	810	NM_000393	COL5A2
hsa_circ_0001637	4.63191	P	3.54526	P	2.12381	2.12381	up	circRNA	ACATGCTGAAATCTTACAGGAAGTCCTTGGAGAGGTAGTCGACTATGCCCAACTTGTTCA	NA	circbase	NA	NA	NA	NA	NA	NA	NA	NA	NA	NA	NA	hsa_circ_0001637	chr6	109931567	109940439	-	8872	588	NM_001145128	AKD1
hsa_circ_0078704	4.12573	P	1.10027	A	8.14246	8.14246	up	circRNA	TTCTCAGACCTCAAGTACGAATGCAGAGAAATTTAAAACCATTTGCCACCAAATCACCTG	NA	circbase	NA	NA	NA	NA	NA	NA	NA	NA	NA	NA	NA	hsa_circ_0078704	chr6	169620292	169639790	-	19498	2479	NM_003247	THBS2
hsa_circ_0064636	4.62158	P	1.35466	A	9.62585	9.62585	up	circRNA	ATACGTTATGCAACCAACACAACAAGAGCAAGACCCAACAAACCTATACATCTCAAATCT	NA	circbase	NA	NA	NA	NA	NA	NA	NA	NA	NA	NA	NA	hsa_circ_0064636	chr3	29781210	29941246	+	160036	579	NM_001177712	RBMS3
hsa_circ_0064307	2.06909	A	3.82216	P	0.296671	3.37074	down	circRNA	CTCCAGAAAATATTCCCCGGTGTGATAACAATTGGTGTATATGATCCCTGTAACTTAGCC	NA	circbase	NA	NA	NA	NA	NA	NA	NA	NA	NA	NA	NA	hsa_circ_0064307	chr3	11372813	11389509	+	16696	606	NM_006395	ATG7
hsa_circ_0034599	4.07545	P	2.35432	A	3.29696	3.29696	up	circRNA	CCCAGGCAATGAATCCAATGCTTTGAGAAATAAGAAAAACTCTCGTCGAGTCAGCTTTGC	NA	circbase	NA	NA	NA	NA	NA	NA	NA	NA	NA	NA	NA	hsa_circ_0034599	chr15	40901044	40921569	+	20525	5625	NM_170589	CASC5
hsa_circ_0073064	4.47564	P	1.42927	A	8.26129	8.26129	up	circRNA	GCAAAACAATTTTGTATCTGTTCAAACTAGGAATAGCACCCCAGATCCAGGATTTGTTGG	NA	circbase	NA	NA	NA	NA	NA	NA	NA	NA	NA	NA	NA	hsa_circ_0073064	chr5	75884730	75923325	+	38595	1154	NM_006633	IQGAP2
hsa_circ_0055002	4.64424	P	2.66269	A	3.94916	3.94916	up	circRNA	GCATCTAACACCCTCTTGGAACAGAGATCATGATGACACGGCATCTACTCGTTCAGGAGG	NA	circbase	NA	NA	NA	NA	NA	NA	NA	NA	NA	NA	NA	hsa_circ_0055002	chr2	66691240	66739426	+	48186	258	NM_002398	MEIS1
hsa_circ_0029186	5.80052	P	4.53824	P	2.39875	2.39875	up	circRNA	CGCGTGCCAAAATGATTTCAAAACTTGAAGCTCAGGTCAAGCAAGTAGAACATGAAAATA	NA	circbase	NA	NA	NA	NA	NA	NA	NA	NA	NA	NA	NA	hsa_circ_0029186	chr12	123661234	123661336	-	102	102	NM_022782	MPHOSPH9
hsa_circ_0016531	3.48793	P	5.05968	P	0.336399	2.97266	down	circRNA	TGTCCTTGTTAGATGCAACCACTGCATGAAGATAATTTCTCACGAGAGAAGACAGCAGAA	NA	circbase	NA	NA	NA	NA	NA	NA	NA	NA	NA	NA	NA	hsa_circ_0016531	chr1	222805506	222819027	+	13521	440	NM_198551	MIA3
hsa_circ_0010602	3.57194	P	1.40162	A	4.50124	4.50124	up	circRNA	ACTAACCGCCAGGGCAAGGTCAAAGCCTTTGCCCACCTGCAGGTGCCAGGAATTCTGGCG	NA	circbase	NA	NA	NA	NA	NA	NA	NA	NA	NA	NA	NA	hsa_circ_0010602	chr1	22159959	22191566	-	31607	6583	NM_005529	HSPG2
hsa_circ_0074988	5.65882	P	3.90157	P	3.38053	3.38053	up	circRNA	CCTGCAGCAGGGTTTGTCTGATCCAGGTAATTATCATGAATTTTGTCGATTTTTGGCTCG	NA	circbase	NA	NA	NA	NA	NA	NA	NA	NA	NA	NA	NA	hsa_circ_0074988	chr5	170345716	170692851	+	347135	1989	NM_022897	RANBP17
hsa_circ_0009684	2.80499	A	4.25519	P	0.36597	2.73247	down	circRNA	AATAAATGGTGACACACGTTCAGAAGAAGTTTTGATGAATAATACTTGGTGGGGCGAGGG	NA	circbase	NA	NA	NA	NA	NA	NA	NA	NA	NA	NA	NA	hsa_circ_0009684	chr1	10093040	10241296	+	148256	5879	NM_001105562	UBE4B
hsa_circ_0039910	3.72744	P	4.84988	P	0.459315	2.17716	down	circRNA	TTACTGTGAGGCTGTAACAGAGGAGGAAATGATTTTGAATAGCCTCTCTCTGTGTTACCA	NA	circbase	NA	NA	NA	NA	NA	NA	NA	NA	NA	NA	NA	hsa_circ_0039910	chr16	68071908	68072052	+	144	144	NM_017803	DUS2L
hsa_circ_0021281	4.82035	P	6.29808	P	0.359053	2.78511	down	circRNA	TTCCAGAGAGATGGAGGCAGAAGAAGCTGCTGCTAAAGCATCATCAGAAGTGAACCTGGC	NA	circbase	NA	NA	NA	NA	NA	NA	NA	NA	NA	NA	NA	hsa_circ_0021281	chr11	11988500	12023984	-	35484	460	NM_015881	DKK3
hsa_circ_0033155	2.76476	A	3.92836	P	0.446395	2.24017	down	circRNA	CAACCAAAAGATGACAGCGCTTCTGCTGCAAGTAGCATGGAGGTGACAGACCGCATTGCT	NA	circbase	NA	NA	NA	NA	NA	NA	NA	NA	NA	NA	NA	hsa_circ_0033155	chr14	100317189	100331983	+	14794	316	NM_001008707	EML1
hsa_circ_0019547	3.02165	A	10.4539	M	0.00578994	172.713	down	circRNA	ATAGCCAACAGGTCCCAGGGAAGCAGGAAGACCCTGGAGGCCTCAGCCATCTGCCGCTAT	NA	circbase	NA	NA	NA	NA	NA	NA	NA	NA	NA	NA	NA	hsa_circ_0019547	chr10	102739604	102740754	+	1150	660	NM_017893	SEMA4G
hsa_circ_0044581	3.21725	P	1.13208	A	4.24325	4.24325	up	circRNA	TACAGTTATTAAATAAGTGTCTGAGTGGACTGTCATCTCAGTGGTCGCGGAAGGTGACGT	NA	circbase	NA	NA	NA	NA	NA	NA	NA	NA	NA	NA	NA	hsa_circ_0044581	chr17	48458593	48474914	-	16321	2915	NM_018509	LRRC59
hsa_circ_0012716	6.25171	P	4.96052	P	2.4473	2.4473	up	circRNA	AGGAAGCCAGATCATCACGGGGGAATTCTACCGGATCTATTACCTGAAGAAGTCGCGGTC	NA	circbase	NA	NA	NA	NA	NA	NA	NA	NA	NA	NA	NA	hsa_circ_0012716	chr1	56989948	56990226	-	278	278	NM_003713	PPAP2B
hsa_circ_0077831	3.64982	P	1.17747	A	5.54949	5.54949	up	circRNA	GCCCTCACAGGTGTGAAGCATCAAGTCCACATATTCATCCAGTTGGTTGGTGTAAGGAAC	NA	circbase	NA	NA	NA	NA	NA	NA	NA	NA	NA	NA	NA	hsa_circ_0077831	chr6	130399702	130415512	+	15810	492	NM_032438	L3MBTL3
hsa_circ_0048129	8.32245	P	7.09001	P	2.34964	2.34964	up	circRNA	ATCATGGTCATCTTCGCTTCCTGCGGAATGTGGTGTCGGGCGAGCACTACCGCTTTGTGA	NA	circbase	NA	NA	NA	NA	NA	NA	NA	NA	NA	NA	NA	hsa_circ_0048129	chr19	1011890	1011991	-	101	101	NM_001033026	C19orf6
hsa_circ_0074605	2.90704	A	3.97937	P	0.475551	2.10283	down	circRNA	AACCCTGACGCAGATGCCAAAGCGCTGCGGAAAGCCATGAAGGGACTCGTGAAGTGTATC	NA	circbase	NA	NA	NA	NA	NA	NA	NA	NA	NA	NA	NA	hsa_circ_0074605	chr5	150503846	150510850	-	7004	402	NM_001155	ANXA6
hsa_circ_0074494	3.68736	P	1.7191	A	3.91295	3.91295	up	circRNA	TCTAATAATAGAAGCTGAACCATCTATCTCCAGAAATGTCTTCAGAAAGTAAAGAGCAAC	NA	circbase	NA	NA	NA	NA	NA	NA	NA	NA	NA	NA	NA	hsa_circ_0074494	chr5	149357190	149366963	+	9773	7832	NM_000112	SLC26A2
hsa_circ_0034169	4.38202	P	3.29314	A	2.12709	2.12709	up	circRNA	TGGAGACCAGGTTAAAAATCTGTAAGAGCCTGATTTTAGAATTCACCAGCTCCTCAGAAG	NA	circbase	NA	NA	NA	NA	NA	NA	NA	NA	NA	NA	NA	hsa_circ_0034169	chr15	25652213	25657118	-	4905	1802	NM_000462	UBE3A
hsa_circ_0007371	7.24648	P	1.10643	A	70.5246	70.5246	up	circRNA	ATTCTTCAAAGCCAACTTCCAGGATTACATCCCTTGGTGTGACCACACCACATCTGAAAT	NA	circbase	NA	NA	NA	NA	NA	NA	NA	NA	NA	NA	NA	hsa_circ_0007371	chr2	238591267	238592138	+	871	871	NM_001137550	LRRFIP1
hsa_circ_0067768	4.3452	P	1.83085	A	5.71339	5.71339	up	circRNA	CCCATGACCATTGAAAGATGCATGAGTGTGATGCAGTCCGGGACACAGATGATCAAGCTG	NA	circbase	NA	NA	NA	NA	NA	NA	NA	NA	NA	NA	NA	hsa_circ_0067768	chr3	155311729	155314167	-	2438	391	NM_001130961	PLCH1
hsa_circ_0030423	3.87158	P	2.10474	A	3.40309	3.40309	up	circRNA	TGAAAATGAAATCAGGTTGATGAGGTAATGCTGACTCTGAAACAGGCCTTCAGTACGGCG	NA	circbase	NA	NA	NA	NA	NA	NA	NA	NA	NA	NA	NA	hsa_circ_0030423	chr13	75898372	75923438	-	25066	923	NM_014832	TBC1D4
hsa_circ_0070578	6.66034	P	4.63191	P	4.07959	4.07959	up	circRNA	TCGACGGGAGTAGAAGGGAGCGGGAGGGGGCTCCGGGCGCCGCGCAGCAGACCTGCTCCG	NA	circbase	NA	NA	NA	NA	NA	NA	NA	NA	NA	NA	NA	hsa_circ_0070578	chr4	106816596	106816880	+	284	284	NM_001184691	NPNT
hsa_circ_0010734	3.16829	A	4.76773	P	0.330004	3.03026	down	circRNA	AACCCGGCTACACTGGCCAGTACTGTGAGCAGTTTTCCCGCACCTGTGAGAGCCTGGGAG	NA	circbase	NA	NA	NA	NA	NA	NA	NA	NA	NA	NA	NA	hsa_circ_0010734	chr1	22188249	22188336	-	87	87	NM_005529	HSPG2
hsa_circ_0017688	2.7596	A	4.72493	P	0.25608	3.90503	down	circRNA	GATGGGAAAAATACAAGAACACTGAAAAGATTCAGACCAGGATGTAGCACTCAAACTTGC	NA	circbase	NA	NA	NA	NA	NA	NA	NA	NA	NA	NA	NA	hsa_circ_0017688	chr10	11551593	11569566	-	17973	272	NM_014688	USP6NL
hsa_circ_0059885	4.08909	P	7.2254	P	0.113731	8.79271	down	circRNA	AACTGCATGCTCACATCCACTCGGGTGTTTCCTTGTGAACGCTACCTGCGGCGTCATCTG	NA	circbase	NA	NA	NA	NA	NA	NA	NA	NA	NA	NA	NA	hsa_circ_0059885	chr20	32371537	32371670	+	133	133	NM_032819	ZNF341
hsa_circ_0073277	3.86689	P	2.81772	A	2.06934	2.06934	up	circRNA	TTCAATCTAAGTAGCAGATATCAAGAGAGTTAACAATCTCATCAGTGATCAAGACTTTTT	NA	circbase	NA	NA	NA	NA	NA	NA	NA	NA	NA	NA	NA	hsa_circ_0073277	chr5	89811444	89815301	-	3857	3857	NM_198273	LYSMD3
hsa_circ_0047422	3.8202	P	2.16523	A	3.14917	3.14917	up	circRNA	CCTAGCAATTGAATCAGAAGAAACCTGAAAATGATGATGATGTGGAGATTAAGAAGCAGT	NA	circbase	NA	NA	NA	NA	NA	NA	NA	NA	NA	NA	NA	hsa_circ_0047422	chr18	33694059	33696742	-	2683	484	NM_012319	SLC39A6
hsa_circ_0018919	3.74527	P	1.65123	A	4.26943	4.26943	up	circRNA	CATGAGCGCGTATATTAATTAATCCTGGAAACCATCTTAAGATCCAAGAAGGTACTTTAG	NA	circbase	NA	NA	NA	NA	NA	NA	NA	NA	NA	NA	NA	hsa_circ_0018919	chr10	78669723	78778857	-	109134	1219	NM_001161352	KCNMA1
hsa_circ_0060938	7.59988	P	6.12677	P	2.77619	2.77619	up	circRNA	AAGAATTGTATGCTGCTGTCACAGAGCTCCAGCTGGCTGCGGTGGAAACGGGAAGGGGAA	NA	circbase	NA	NA	NA	NA	NA	NA	NA	NA	NA	NA	NA	hsa_circ_0060938	chr20	52779255	52788209	-	8954	541	NM_000782	CYP24A1
hsa_circ_0086527	3.91299	P	2.04757	A	3.64374	3.64374	up	circRNA	CCACCAAAAGGATTTTCCTGTTGAACTGGTCATAATTGGAATAGCTTTACTACTTCTACA	NA	circbase	NA	NA	NA	NA	NA	NA	NA	NA	NA	NA	NA	hsa_circ_0086527	chr9	20778679	20781928	+	3249	291	NM_017794	KIAA1797
hsa_circ_0047326	5.09424	P	6.36202	P	0.415299	2.40791	down	circRNA	CTGAATCCAGCTGGACCGGCGCGGACTTGCCCCAGACCTACGGGGAGCGCCCCAGGTCTT	NA	circbase	NA	NA	NA	NA	NA	NA	NA	NA	NA	NA	NA	hsa_circ_0047326	chr18	24081035	24129399	-	48364	724	NM_001136205	KCTD1
hsa_circ_0000777	3.62922	P	1.20235	A	5.37724	5.37724	up	circRNA	AGTAGAAATGCATTCCAGGATGCCTTGAAGATTTTCTGTAGGATAAAAGGTGGTCGAGTT	NA	circbase	NA	NA	NA	NA	NA	NA	NA	NA	NA	NA	NA	hsa_circ_0000777	chr17	45438743	45455269	+	16526	849	NM_152347	C17orf57
hsa_circ_0076853	1.60385	A	4.05709	P	0.1826	5.47644	down	circRNA	TGGAGATAGCTCAACCGAACAATTTTTCAATGATGCCAAAGAAGCTACTGATTACTTAAG	NA	circbase	NA	NA	NA	NA	NA	NA	NA	NA	NA	NA	NA	hsa_circ_0076853	chr6	56468634	56500512	-	31878	18181	NM_001723	DST
hsa_circ_0011818	2.88987	A	5.17333	P	0.205404	4.86846	down	circRNA	CAGAACAAAAGGCTCTCAGAAAAAGAGAAGAAACAAATATCTGAGCAATTGAATGCCCTA	NA	circbase	NA	NA	NA	NA	NA	NA	NA	NA	NA	NA	NA	hsa_circ_0011818	chr1	39792889	39793025	+	136	136	NM_012090	MACF1
hsa_circ_0018973	6.22763	P	2.90841	A	9.98127	9.98127	up	circRNA	TGTAATTGATGATCTCCCATTAACCAGTCATAATGAAGTAAGAACAAGAAGATGGGGAAG	NA	circbase	NA	NA	NA	NA	NA	NA	NA	NA	NA	NA	NA	hsa_circ_0018973	chr10	81813151	81813342	-	191	191	NR_027428	LOC219347
hsa_circ_0050694	3.62975	P	5.91874	P	0.204619	4.88714	down	circRNA	AAAGCGGCTGCTTCCTCTTCCACAGGAAGGCGGAAGCAGTCTACCCAGATACAGTGGCAC	NA	circbase	NA	NA	NA	NA	NA	NA	NA	NA	NA	NA	NA	hsa_circ_0050694	chr19	36564243	36587981	+	23738	1477	NM_001083961	WDR62
hsa_circ_0062423	6.42424	P	7.99963	P	0.335554	2.98014	down	circRNA	ATTAAAGAATGTTGGTCTATGAGCAGCGGCCAGCAATCGGTGACCGGCGTAGAGGCGTCG	NA	circbase	NA	NA	NA	NA	NA	NA	NA	NA	NA	NA	NA	hsa_circ_0062423	chr22	21997150	21998588	+	1438	603	NM_022044	SDF2L1
hsa_circ_0020086	6.64484	P	1.11579	A	46.1753	46.1753	up	circRNA	TCATAGGCAGCTTGGACTCATATAGTCATAAAGAAGATGCTTCAGCATTTCCAGGAAAAC	NA	circbase	NA	NA	NA	NA	NA	NA	NA	NA	NA	NA	NA	hsa_circ_0020086	chr10	116605125	116608496	+	3371	790	NM_020940	FAM160B1
hsa_circ_0071244	4.12032	P	2.20455	A	3.77314	3.77314	up	circRNA	GTTGATGTTCATTAAGCAATTAGTGATGAAGATGGACCGCGACCTAATCAAAAAGAAATG	NA	circbase	NA	NA	NA	NA	NA	NA	NA	NA	NA	NA	NA	hsa_circ_0071244	chr4	151818890	151818970	-	80	80	NM_001199282	LRBA
hsa_circ_0041019	3.6031	P	5.09913	P	0.354528	2.82065	down	circRNA	TCCACCAAAGATTTTGTACAGCAGCAATTTCTTACTCTCTCTGCAAGTTTTCTTCCCAGT	NA	circbase	NA	NA	NA	NA	NA	NA	NA	NA	NA	NA	NA	hsa_circ_0041019	chr16	89824984	89833645	-	8661	477	NM_000135	FANCA
hsa_circ_0049405	4.07338	P	3.03253	A	2.05743	2.05743	up	circRNA	CGTCTTGCACCAAATTTGCGCGGGTTGGAGCCTGGCGTAGTCATGGCCGCCTTCCGCGAC	NA	circbase	NA	NA	NA	NA	NA	NA	NA	NA	NA	NA	NA	hsa_circ_0049405	chr19	11257830	11266484	-	8654	654	NM_182513	SPC24
hsa_circ_0087180	6.58334	P	5.57236	P	2.01528	2.01528	up	circRNA	ATACCAGACATTTAAAGCTGATGGAACAGGATACTTGCAATCTTGAAGAGGAAGAGCGAA	NA	circbase	NA	NA	NA	NA	NA	NA	NA	NA	NA	NA	NA	hsa_circ_0087180	chr9	72938398	72959185	+	20787	373	NM_015110	SMC5
hsa_circ_0084941	5.21173	P	4.03446	P	2.26149	2.26149	up	circRNA	GCAGTGCCAGTTTGTCTGTTCCAGTATTGAATATGCTACTAAATGAACTACTCTGCATCA	NA	circbase	NA	NA	NA	NA	NA	NA	NA	NA	NA	NA	NA	hsa_circ_0084941	chr8	95839490	95844402	+	4912	448	NM_017864	INTS8
hsa_circ_0035012	3.86515	P	2.36826	A	2.82233	2.82233	up	circRNA	ACTACGATCAGAATGCAACCTGATAGAAGGTGAAGACCAAGTAGAGGTCAATGGAGCTGT	NA	circbase	NA	NA	NA	NA	NA	NA	NA	NA	NA	NA	NA	hsa_circ_0035012	chr15	43868568	43874447	-	5879	1436	NM_001130858	PPIP5K1
hsa_circ_0067182	4.70546	P	5.78569	P	0.472954	2.11437	down	circRNA	AGACTCTCAAGTTGGCCACGGACAGAGCGAAGGGGAGAGGATGGTAGTGTCTGACTTCCA	NA	circbase	NA	NA	NA	NA	NA	NA	NA	NA	NA	NA	NA	hsa_circ_0067182	chr3	127413817	127441409	-	27592	554	NM_007283	MGLL
hsa_circ_0066193	2.2038	A	3.61786	P	0.375254	2.66486	down	circRNA	GGCTTACCAGGGGAGGGAGCCACTGCCCATCTGGAAACAGGTGGGTTCATCCGCAGCCAG	NA	circbase	NA	NA	NA	NA	NA	NA	NA	NA	NA	NA	NA	hsa_circ_0066193	chr3	53853558	53853701	-	143	143	NM_018397	CHDH
hsa_circ_0024210	3.37766	P	1.24271	A	4.39219	4.39219	up	circRNA	ATTTTTTCCAAAGCGTGCCAGAATGTCCTGCAGTATGCTGTTTGACTTTGGCACTGACCA	NA	circbase	NA	NA	NA	NA	NA	NA	NA	NA	NA	NA	NA	hsa_circ_0024210	chr11	108122563	108123639	+	1076	291	NM_000051	ATM
hsa_circ_0077713	5.30379	P	7.75995	P	0.182231	5.48753	down	circRNA	CTTTAGTAAGTTGTTCAAACGCAGAAATGTCTATTTGCCCAGAAATGATGAATCTATGCT	NA	circbase	NA	NA	NA	NA	NA	NA	NA	NA	NA	NA	NA	hsa_circ_0077713	chr6	117013217	117037481	+	24264	618	NM_002269	KPNA5
hsa_circ_0085051	3.58463	P	1.57299	A	4.03241	4.03241	up	circRNA	CACAATTCCGGAACTGAAATTACCATTCACTTTTTTAAGTGGACATATTCATGAATTGAG	NA	circbase	NA	NA	NA	NA	NA	NA	NA	NA	NA	NA	NA	hsa_circ_0085051	chr8	100050650	100287482	+	236832	2677	NM_017890	VPS13B
hsa_circ_0013809	2.50766	A	7.77412	P	0.02598	38.4911	down	circRNA	GAACTGTGAAAAGAGGCAGAGGCTGCATAAGAGGAGTAAACACAAAGTACATTTGACCAC	NA	circbase	NA	NA	NA	NA	NA	NA	NA	NA	NA	NA	NA	hsa_circ_0013809	chr1	143220633	143231561	+	10928	10928	TCONS_00001137	TCONS_00001137
hsa_circ_0027624	4.98014	P	8.30263	M	0.0999609	10.0039	down	circRNA	AGCTGATAAGATACTATATTTCGAAAGGTGCTATTGTGGATCAACTTGGAGGGGACCTGA	NA	circbase	NA	NA	NA	NA	NA	NA	NA	NA	NA	NA	NA	hsa_circ_0027624	chr12	77202822	77216311	+	13489	577	NM_015336	ZDHHC17
hsa_circ_0008286	4.15303	P	2.98259	A	2.2508	2.2508	up	circRNA	AAATTGCACCACAGATATATGGGTTGTTTCCTGAAATGCAGTTTTTCCAGCAAGAAAATG	NA	circbase	NA	NA	NA	NA	NA	NA	NA	NA	NA	NA	NA	hsa_circ_0008286	chr3	17413566	17425507	-	11941	486	NM_014744	TBC1D5
hsa_circ_0053190	4.55885	P	6.14504	P	0.33305	3.00255	down	circRNA	ATGATGGTTCCAATGAAGGCATTGTGCACAACAGCTTGCCTTTCTTCAGATATGGGAACC	NA	circbase	NA	NA	NA	NA	NA	NA	NA	NA	NA	NA	NA	hsa_circ_0053190	chr2	27446430	27446616	+	186	186	NM_004341	CAD
hsa_circ_0038064	6.90755	P	12.604	M	0.0192842	51.856	down	circRNA	TAAGCAAGTCACCTCTTTTATATGGGATTTTAGCCCATTTCTTGCGTGGAACTAAGGATG	NA	circbase	NA	NA	NA	NA	NA	NA	NA	NA	NA	NA	NA	hsa_circ_0038064	chr16	15959576	15967484	-	7908	1934	NM_144600	FOPNL
hsa_circ_0076810	3.65383	P	2.28916	A	2.57517	2.57517	up	circRNA	ATATATGGAATTCCATGACAAGATAGATCAGATCCTTGAGAGCCTGGAACGCATCGTGGA	NA	circbase	NA	NA	NA	NA	NA	NA	NA	NA	NA	NA	NA	hsa_circ_0076810	chr6	56322784	56374671	-	51887	5623	NM_015548	DST
hsa_circ_0079355	4.40592	P	5.58851	P	0.44056	2.26984	down	circRNA	GGCACACAAGCTGCAGAAGCAGAACCACAGACTATGACTTGGTCGGAGGCGATCAGCTCA	NA	circbase	NA	NA	NA	NA	NA	NA	NA	NA	NA	NA	NA	hsa_circ_0079355	chr7	6461357	6465745	-	4388	289	NM_139179	DAGLB
hsa_circ_0026384	4.79096	P	6.16606	P	0.385525	2.59387	down	circRNA	TGGAATGTGTCTATTAAATGCATGTGTCACCTGCTGTGGTCACCTCTACTCTTTCCAGTG	NA	circbase	NA	NA	NA	NA	NA	NA	NA	NA	NA	NA	NA	hsa_circ_0026384	chr12	52817853	52818539	-	686	686	NM_004693	KRT75
hsa_circ_0025913	3.74765	P	1.17973	A	5.92952	5.92952	up	circRNA	AATAATAAAGAATATATGCATGCATCTGTGGTGCACAAGCACAGAAAAGCTTCACAAAGG	NA	circbase	NA	NA	NA	NA	NA	NA	NA	NA	NA	NA	NA	hsa_circ_0025913	chr12	43770038	43856802	-	86764	3711	NM_025003	ADAMTS20
hsa_circ_0053905	3.98832	P	2.95484	A	2.04695	2.04695	up	circRNA	CAGTTTCCAGTGAAATTTCCTCCTAACATAGTCAATATCCATGTGAAACATCCTCCTGAA	NA	circbase	NA	NA	NA	NA	NA	NA	NA	NA	NA	NA	NA	hsa_circ_0053905	chr2	33413643	33487888	+	74245	1092	NM_206943	LTBP1
hsa_circ_0015057	1.09415	A	4.35864	P	0.104062	9.60964	down	circRNA	GCACTGTCAGACTCCAGTTCCAACACCATCTTCTGAGATGATCCTGATTCCCAGAATGCT	NA	circbase	NA	NA	NA	NA	NA	NA	NA	NA	NA	NA	NA	hsa_circ_0015057	chr1	162688826	162745633	+	56807	2075	NM_001014796	DDR2
hsa_circ_0047327	2.79854	A	4.07498	P	0.412813	2.42241	down	circRNA	CATTAATGAGGACTATGACTTGAGCCAGCTGCAGCAGCCTGACACTGTGGAGCCTGATGC	NA	circbase	NA	NA	NA	NA	NA	NA	NA	NA	NA	NA	NA	hsa_circ_0047327	chr18	25543320	25543485	-	165	165	NM_001792	CDH2
hsa_circ_0067411	3.56272	P	2.51698	A	2.06442	2.06442	up	circRNA	AAGGAGGACTTGATCTGGGAGCTTCTCAACCAGGCCCAGCAGTGGCCAATTTCTTCTCGG	NA	circbase	NA	NA	NA	NA	NA	NA	NA	NA	NA	NA	NA	hsa_circ_0067411	chr3	133474206	133475853	+	1647	368	NM_001063	TF
hsa_circ_0070432	4.3998	P	3.38277	A	2.02375	2.02375	up	circRNA	TTCGACATGGGAGAGACAACAAAGTAAAGCAGCGGTTCGGCTGAAAGAAGACATGAAAAA	NA	circbase	NA	NA	NA	NA	NA	NA	NA	NA	NA	NA	NA	hsa_circ_0070432	chr4	89708903	89950800	-	241897	1244	NM_014883	FAM13A
hsa_circ_0082654	2.75223	A	3.88515	P	0.455991	2.19303	down	circRNA	TAACAGCCAGTGTGCAGGGCAAAGAAAAAGGTGATTCCTGCACCTAAACCCAAAGTAAAG	NA	circbase	NA	NA	NA	NA	NA	NA	NA	NA	NA	NA	NA	hsa_circ_0082654	chr7	138964063	138969320	+	5257	1645	NM_173569	UBN2
hsa_circ_0017917	6.61001	P	3.20445	A	10.5968	10.5968	up	circRNA	ATTTCCAGCTTGATGAGTCCAGCTGCTCGTGTATACCATTGAAGAATCGGGGCTAAACAT	NA	circbase	NA	NA	NA	NA	NA	NA	NA	NA	NA	NA	NA	hsa_circ_0017917	chr10	19856430	19896829	+	40399	40399	---	---
hsa_circ_0052011	3.07457	A	4.52066	P	0.367014	2.72469	down	circRNA	TCTTCCAACAGTTGGAGATTGACCATTATGTGGCAGGATGGATGGCAAGCGGCGGCCAGG	NA	circbase	NA	NA	NA	NA	NA	NA	NA	NA	NA	NA	NA	hsa_circ_0052011	chr19	50902104	50902741	+	637	320	NM_002691	POLD1
hsa_circ_0036148	3.46572	P	1.4227	A	4.12109	4.12109	up	circRNA	TAGATCAATGGAACTATCATGTATTCTATTACCTCCTGGCAGGAGCAAGTGAAGATGAGA	NA	circbase	NA	NA	NA	NA	NA	NA	NA	NA	NA	NA	NA	hsa_circ_0036148	chr15	72141185	72313358	-	172173	5839	NM_006901	MYO9A
hsa_circ_0014221	10.3726	P	8.4596	P	3.76582	3.76582	up	circRNA	CTCCAAGTCAAAGGAGAATAAGAATGAAAAGGTCATAGAACACATCATGGAGGACCTGGA	NA	circbase	NA	NA	NA	NA	NA	NA	NA	NA	NA	NA	NA	hsa_circ_0014221	chr1	153333119	153333503	+	384	384	NM_002965	S100A9
hsa_circ_0024424	2.64515	A	5.94508	P	0.101537	9.84867	down	circRNA	TTCTTGCTCAGCCAATAAATATATCCTCTTTCACTCAGTGTGCCAGAGCTGTGTGGAGCT	NA	circbase	NA	NA	NA	NA	NA	NA	NA	NA	NA	NA	NA	hsa_circ_0024424	chr11	118209788	118210621	-	833	330	NM_000732	CD3D
hsa_circ_0091095	4.78596	P	3.65741	P	2.18639	2.18639	up	circRNA	CACTTAACAGGTGGTAAGTTTTCTTCATACAGTTCTTTTGTGTGACAAACTGGATTTCAG	NA	circbase	NA	NA	NA	NA	NA	NA	NA	NA	NA	NA	NA	hsa_circ_0091095	chrX	76872080	76889200	-	17120	757	NM_000489	ATRX
hsa_circ_0055703	2.89488	A	5.67153	P	0.14593	6.8526	down	circRNA	TTTCTTTGTGCACATTAAAGTCTTCTTTCAGCATCAGCCTGCTACCTGTGCCACAGCTTG	NA	circbase	NA	NA	NA	NA	NA	NA	NA	NA	NA	NA	NA	hsa_circ_0055703	chr2	97541618	97544230	-	2612	658	NM_001122646	FAM178B
hsa_circ_0077139	5.62418	P	7.85414	P	0.213164	4.69122	down	circRNA	ACTTCCTCAGGTGAAGTATTACAGACACTTAGCACCTGATCACTTGCTGCAAATATGTCA	NA	circbase	NA	NA	NA	NA	NA	NA	NA	NA	NA	NA	NA	hsa_circ_0077139	chr6	79711615	79770535	-	58920	1690	NM_017934	PHIP
hsa_circ_0088635	1.13999	A	3.47628	P	0.198019	5.05002	down	circRNA	TAAAAAAGAGAACATGCTTAATAGACGATCTTTTAGTGATGTCTTACCAGAGTCACCCAA	NA	circbase	NA	NA	NA	NA	NA	NA	NA	NA	NA	NA	NA	hsa_circ_0088635	chr9	130106513	130107756	+	1243	180	NM_032293	GARNL3
hsa_circ_0049412	3.89672	P	2.19585	A	3.25096	3.25096	up	circRNA	AGCCAGCCAGGTATGAGTCGTCATCCGAGGACTCCAGCACAGCAGAGAACATCTCAGACA	NA	circbase	NA	NA	NA	NA	NA	NA	NA	NA	NA	NA	NA	hsa_circ_0049412	chr19	11283656	11287493	-	3837	691	NM_001136191	KANK2
hsa_circ_0085205	5.99144	P	7.47252	P	0.35822	2.79158	down	circRNA	ACCAATCAAAGGAGTGATATGGAGCTGGACTTGTTAGCAGCAGCTGAAACAGAAAGTGAT	NA	circbase	NA	NA	NA	NA	NA	NA	NA	NA	NA	NA	NA	hsa_circ_0085205	chr8	103292621	103299792	-	7171	1176	NM_015902	UBR5
hsa_circ_0049800	4.07973	P	2.90249	A	2.26144	2.26144	up	circRNA	TGTCAAACTTTGAACAATTCCAGGAAGAGCTGGAAAAATTCCAGCAGGCCATCGATTCCC	NA	circbase	NA	NA	NA	NA	NA	NA	NA	NA	NA	NA	NA	hsa_circ_0049800	chr19	15164543	15169103	+	4560	2755	NM_012114	CASP14
hsa_circ_0005468	3.37431	P	2.32819	A	2.06498	2.06498	up	circRNA	TATCAATGGAAGAAAAGTTGTATGAATCAGGGGCAAAAAGGCCCCGAGTCACTTCAGGTG	NA	circbase	NA	NA	NA	NA	NA	NA	NA	NA	NA	NA	NA	hsa_circ_0005468	chr11	125513686	125514538	+	852	419	NM_001114122	CHEK1
hsa_circ_0069676	3.95144	P	2.81067	A	2.205	2.205	up	circRNA	AGATGCACAGGTGTAACATAGCAGTGATCCTTTTGACTGATCTCATCATTGATCATAGTG	NA	circbase	NA	NA	NA	NA	NA	NA	NA	NA	NA	NA	NA	hsa_circ_0069676	chr4	48545823	48550810	-	4987	808	NM_015030	FRYL
hsa_circ_0074427	4.07245	P	3.06401	A	2.01174	2.01174	up	circRNA	GTATCAGAACGACACGTGAGAAAAAAAGAGAAGACGGGAAATGGAGAGACTATGACCGGT	NA	circbase	NA	NA	NA	NA	NA	NA	NA	NA	NA	NA	NA	hsa_circ_0074427	chr5	145609279	145616995	+	7716	884	NM_018989	RBM27
hsa_circ_0071164	3.56432	P	1.63609	A	3.80587	3.80587	up	circRNA	CTCAAACCAGCCATTCAACAAAGACAGTTATGGACTTCGTGAATAGCAGTGATAATGTCA	NA	circbase	NA	NA	NA	NA	NA	NA	NA	NA	NA	NA	NA	hsa_circ_0071164	chr4	151408883	151770727	-	361844	2580	NM_006726	LRBA
hsa_circ_0016155	3.8373	P	2.62147	A	2.32275	2.32275	up	circRNA	TCCTGCAGAAGCGCCCAGACACCATGTCACAACCCTCCAGAACTGACGTTGGCAGGAAGT	NA	circbase	NA	NA	NA	NA	NA	NA	NA	NA	NA	NA	NA	hsa_circ_0016155	chr1	204433139	204439014	-	5875	1394	NM_002646	PIK3C2B
hsa_circ_0047623	3.31751	P	4.38024	P	0.478726	2.08888	down	circRNA	ATCGACCGCGAAGGAATGGCAGCAAAGACAACTCTCTGGACATGCTGGGCACGGACATCT	NA	circbase	NA	NA	NA	NA	NA	NA	NA	NA	NA	NA	NA	hsa_circ_0047623	chr18	46190122	46190922	+	800	179	NM_001142397	CTIF
hsa_circ_0061615	5.99815	P	4.12831	P	3.65492	3.65492	up	circRNA	TTCCCTGAGGATAATGCTTATGATCCTGATGTGAACGCTAAACAAATATGGATTGACAAA	NA	circbase	NA	NA	NA	NA	NA	NA	NA	NA	NA	NA	NA	hsa_circ_0061615	chr21	37709171	37713844	+	4673	644	NM_015358	MORC3
hsa_circ_0067871	4.12645	P	6.73878	P	0.163535	6.11489	down	circRNA	GCCAACCCGAGAGGTGCAGGAGTTGTATATGAACACAGATCAAGATTAGAGAAATCCTTG	NA	circbase	NA	NA	NA	NA	NA	NA	NA	NA	NA	NA	NA	hsa_circ_0067871	chr3	167754623	167766153	-	11530	656	NM_014498	GOLIM4
hsa_circ_0085340	2.39458	A	3.57134	P	0.442346	2.26067	down	circRNA	AACTGTACAAGACCAAATATTCAAAGTCCAGTGCTTATTTCCCTCAGTGGGGATTATTCA	NA	circbase	NA	NA	NA	NA	NA	NA	NA	NA	NA	NA	NA	hsa_circ_0085340	chr8	113293402	113326281	-	32879	1959	NM_198123	CSMD3
hsa_circ_0074061	3.34796	P	2.20005	A	2.21591	2.21591	up	circRNA	CACATCCAAGGATGATTATTTCAGAAACTGGAATCCCAACAAGCCCTTTGACCAAGCCCT	NA	circbase	NA	NA	NA	NA	NA	NA	NA	NA	NA	NA	NA	hsa_circ_0074061	chr5	136448123	136602744	-	154621	288	NM_004598	SPOCK1
hsa_circ_0042328	2.66667	A	4.36913	P	0.307261	3.25457	down	circRNA	ATGGAGAAGCATGGCATTGGGAGAAGGCGGGCGGAAGTTCCACGCCAAGATACTGGATTC	NA	circbase	NA	NA	NA	NA	NA	NA	NA	NA	NA	NA	NA	hsa_circ_0042328	chr17	18193870	18218321	-	24451	1826	NM_004618	TOP3A
hsa_circ_0017886	2.59267	A	9.28266	M	0.00968522	103.25	down	circRNA	ATGGAAACGGCAAGCAGAAGAATATGCAAATTTTAGGATTCTGGTGGAGGAAAGCAGGGA	NA	circbase	NA	NA	NA	NA	NA	NA	NA	NA	NA	NA	NA	hsa_circ_0017886	chr10	17401512	17495656	-	94144	276	NM_001004470	ST8SIA6
hsa_circ_0041467	6.25874	P	3.04507	A	9.27707	9.27707	up	circRNA	GACCACGGTGGCCAGAAATCAGCGAGGAGCTCAAGGACCTGATCCTGAAGATGTTAGACA	NA	circbase	NA	NA	NA	NA	NA	NA	NA	NA	NA	NA	NA	hsa_circ_0041467	chr17	3772780	3773182	-	402	217	NM_032294	CAMKK1
hsa_circ_0017096	4.56732	P	3.48793	A	2.11314	2.11314	up	circRNA	GTGGATGCAGCTGTCGTGGACCAGCGCCCCATCAACTACTGTGAAACTGGCCTTCATAAC	NA	circbase	NA	NA	NA	NA	NA	NA	NA	NA	NA	NA	NA	hsa_circ_0017096	chr1	236143795	236176860	-	33065	1131	NM_002508	NID1
hsa_circ_0032569	8.15878	P	9.3979	P	0.423628	2.36056	down	circRNA	ATCTCTCCCTCAGGCTGGGACTGTGTGGATGTGGACGAGTGTGCCACCACAGACCCGTGT	NA	circbase	NA	NA	NA	NA	NA	NA	NA	NA	NA	NA	NA	hsa_circ_0032569	chr14	74973400	74974798	-	1398	381	NM_000428	LTBP2
hsa_circ_0002392	2.36125	A	3.83891	P	0.359071	2.78497	down	circRNA	GGTCTGGGCAGTAAAAGAAATAGGAGATTACTTTAAACAACACCTTTTGCAGTCCAGGCA	NA	circbase	NA	NA	NA	NA	NA	NA	NA	NA	NA	NA	NA	hsa_circ_0002392	chr2	43725971	43755127	-	29156	480	NM_001083953	THADA
hsa_circ_0056971	3.36063	P	1.9519	A	2.65503	2.65503	up	circRNA	CTGACTTCTGGTTTTGCAAAAGGCATCAAATTAAATCAAGTTCAAATATTCCCTGTGTCC	NA	circbase	NA	NA	NA	NA	NA	NA	NA	NA	NA	NA	NA	hsa_circ_0056971	chr2	170728745	170732459	+	3714	299	NM_172070	UBR3
hsa_circ_0062651	3.40999	P	1.26887	A	4.41105	4.41105	up	circRNA	CACTGGAAAAATCCATACATAGAAGAAATTTGTGAAAGCCTTCGAGGTGACATTTTTCAA	NA	circbase	NA	NA	NA	NA	NA	NA	NA	NA	NA	NA	NA	hsa_circ_0062651	chr22	26063705	26070495	+	6790	206	NM_005160	ADRBK2
hsa_circ_0039998	4.06054	P	2.92548	A	2.19627	2.19627	up	circRNA	TAGCTCCTCTTCATCGATGTTTGAATACAGCAGTCCTGCACAGATGTGAAGACACAGATG	NA	circbase	NA	NA	NA	NA	NA	NA	NA	NA	NA	NA	NA	hsa_circ_0039998	chr16	68900981	68912183	+	11202	442	NM_024562	TMCO7
hsa_circ_0090321	4.636	P	6.09025	P	0.364945	2.74014	down	circRNA	TTTGTTTGTTAATAAAGTGCACTGCCACCCCCAATGCAGACGTTCCAGCGGTAGAAATCA	NA	circbase	NA	NA	NA	NA	NA	NA	NA	NA	NA	NA	NA	hsa_circ_0090321	chrX	43603613	43606068	+	2455	2455	NM_000240	MAOA
hsa_circ_0088542	5.39953	P	3.84666	P	2.93401	2.93401	up	circRNA	TAATAATCAGACAAGTCTTGGATAATCGGTATGGCTTGAAGCGCTGGCAAATAGGAGAAA	NA	circbase	NA	NA	NA	NA	NA	NA	NA	NA	NA	NA	NA	hsa_circ_0088542	chr9	127781077	127790757	-	9680	535	NM_173690	SCAI
hsa_circ_0089771	5.10272	P	11.4671	M	0.0121377	82.3881	down	circRNA	AACATCTTCGGGGACATGCTGTGTCCTCGTGGGGTTGCCCAGGGCTCACCTCTGATGGGT	NA	circbase	NA	NA	NA	NA	NA	NA	NA	NA	NA	NA	NA	hsa_circ_0089771	chrX	200833	208321	+	7488	7488	---	---
hsa_circ_0024102	6.19363	P	5.14283	P	2.07168	2.07168	up	circRNA	GAGTCATCAAGTAACAGTGATGATGTCAAATGCTTTTGCTGTGATGGTGGACTCAGGTGT	NA	circbase	NA	NA	NA	NA	NA	NA	NA	NA	NA	NA	NA	hsa_circ_0024102	chr11	102196196	102199676	+	3480	228	NM_001165	BIRC3
hsa_circ_0083463	1.61114	A	3.41682	P	0.286047	3.49593	down	circRNA	CTCAGCTGAAAAGCAGAGTTAAAAACATCAGTATGAATTTCAGCCCTTTATTTCCTTCTA	NA	circbase	NA	NA	NA	NA	NA	NA	NA	NA	NA	NA	NA	hsa_circ_0083463	chr8	17827085	17830196	+	3111	531	NM_006197	PCM1
hsa_circ_0027876	5.3799	P	6.51495	P	0.455321	2.19625	down	circRNA	GTATATACAGGAGGTTGAAACCTACTTTTTTGAGGGTCTGCTGAAATGGAGAGAATTAAA	NA	circbase	NA	NA	NA	NA	NA	NA	NA	NA	NA	NA	NA	hsa_circ_0027876	chr12	101679347	101680287	+	940	389	NM_014503	UTP20
hsa_circ_0029987	5.76981	P	3.16329	A	6.09032	6.09032	up	circRNA	CATGCACCTGAGTACCTTCAAGTTTAAATCTGAGAGTGATATTCATTTGGCAGAACATCA	NA	circbase	NA	NA	NA	NA	NA	NA	NA	NA	NA	NA	NA	hsa_circ_0029987	chr13	35644044	36220485	+	576441	6468	NM_015678	NBEA
hsa_circ_0029712	4.28838	P	3.04417	A	2.36889	2.36889	up	circRNA	ACAAAAAATAGTAAAACTTCAGTCAAGAAGCTGACAAAAAAGGACATCGAGGATACACTG	NA	circbase	NA	NA	NA	NA	NA	NA	NA	NA	NA	NA	NA	hsa_circ_0029712	chr13	22066827	22113827	-	47000	1507	NM_152726	EFHA1
hsa_circ_0020984	8.69734	P	7.69537	P	2.00273	2.00273	up	circRNA	TACTACTGGGGAGTGAAAGCTGGACATTGAAGAAGCCAAAATCTGTTTCCAAGAAACTAA	NA	circbase	NA	NA	NA	NA	NA	NA	NA	NA	NA	NA	NA	hsa_circ_0020984	chr11	5729402	5729833	+	431	128	NM_006074	TRIM22
hsa_circ_0056671	6.32663	P	7.45552	P	0.457269	2.1869	down	circRNA	TCACAAGATGGCCTACCCTCCTGTACTTGTTCCAACTCAAGACTGATTGTGTAGAAAAAA	NA	circbase	NA	NA	NA	NA	NA	NA	NA	NA	NA	NA	NA	hsa_circ_0056671	chr2	148657026	148657467	+	441	265	NM_001616	ACVR2A
hsa_circ_0017612	1.11825	A	6.62686	P	0.0219657	45.5255	down	circRNA	GGGGACAGAGACATCATTCAGTCGAGGTTTCACAAAGAACATGAAACTTGAAGCTGTGAA	NA	circbase	NA	NA	NA	NA	NA	NA	NA	NA	NA	NA	NA	hsa_circ_0017612	chr10	7213856	7262499	-	48643	1212	NM_001029880	SFMBT2
hsa_circ_0050833	1.15452	A	5.1589	P	0.0623107	16.0486	down	circRNA	CACTGTCCAGGCCATGCTGCACCAGGAGGGCCACATGGACGACGCACTGTCGCTGACCCG	NA	circbase	NA	NA	NA	NA	NA	NA	NA	NA	NA	NA	NA	hsa_circ_0050833	chr19	38942403	38951231	+	8828	1455	NM_000540	RYR1
hsa_circ_0039733	4.00282	P	6.58798	P	0.166643	6.00084	down	circRNA	GCCCATGATGGGTCTCTCATTCATCACTTTTATCTGCTATGTGGCGTCCTCAGCATCTGC	NA	circbase	NA	NA	NA	NA	NA	NA	NA	NA	NA	NA	NA	hsa_circ_0039733	chr16	66642211	66642367	+	156	156	NR_037613	CMTM3
hsa_circ_0045043	7.45881	P	4.52497	P	7.6414	7.6414	up	circRNA	GAGTTGGGAGGTGGAAGAATGTCACTTGCCAGGCCTTGGTGTGGCTTTGACATTGGATCA	NA	circbase	NA	NA	NA	NA	NA	NA	NA	NA	NA	NA	NA	hsa_circ_0045043	chr17	59962261	59989054	-	26793	1309	NR_026641	INTS2
hsa_circ_0006552	4.91753	P	1.9789	A	7.66686	7.66686	up	circRNA	ATATTTATGGAAAAGATGCCTCCTGATTAGGACTGGTATGAACAGTTGTATCCCCTCATC	NA	circbase	NA	NA	NA	NA	NA	NA	NA	NA	NA	NA	NA	hsa_circ_0006552	chr4	143029245	143045913	-	16668	654	NM_003866	INPP4B
hsa_circ_0073619	4.14447	P	2.77019	A	2.59238	2.59238	up	circRNA	AGCATTCCAGAAGAGAAACAACAAACCACACTTACAGAATGGTACTCAGCTCAAGAAAAT	NA	circbase	NA	NA	NA	NA	NA	NA	NA	NA	NA	NA	NA	hsa_circ_0073619	chr5	112876664	112899828	+	23164	1505	NM_022828	YTHDC2
hsa_circ_0004901	3.78845	P	2.65044	A	2.20077	2.20077	up	circRNA	GCTGATGGAACCTTAAAGAAACAAAAAAAACATCACGAATCTTTCCCGCTTAGTTGTCCG	NA	circbase	NA	NA	NA	NA	NA	NA	NA	NA	NA	NA	NA	hsa_circ_0004901	chr12	99071202	99080651	+	9449	511	NM_181861	APAF1
hsa_circ_0054918	4.65437	P	5.73301	P	0.473476	2.11204	down	circRNA	ATGGACACAGAACAAAACAGTAAGTTGGTGGACTTGAAGCTGAAGAAGCTCCTAGAAGTT	NA	circbase	NA	NA	NA	NA	NA	NA	NA	NA	NA	NA	NA	hsa_circ_0054918	chr2	63217850	63223901	+	6051	495	NM_015252	EHBP1
hsa_circ_0073172	6.20638	P	8.0308	P	0.282355	3.54164	down	circRNA	TTTTCACAAGGGAGTGCAGCCTGCCACAGGCGAGGTTGTGTTTGATAGTTTCCAGGACTC	NA	circbase	NA	NA	NA	NA	NA	NA	NA	NA	NA	NA	NA	hsa_circ_0073172	chr5	79974745	80109560	+	134815	1640	NM_002439	MSH3
hsa_circ_0024193	5.12236	P	4.02299	P	2.1426	2.1426	up	circRNA	GCAAACAGAAACAGTGATGTGTGTTCTGAAATTGTGAACCATGAGTCTAGTACTTAATGA	NA	circbase	NA	NA	NA	NA	NA	NA	NA	NA	NA	NA	NA	hsa_circ_0024193	chr11	108098321	108100050	+	1729	361	NM_000051	ATM
hsa_circ_0062892	3.36393	P	1.80689	A	2.94251	2.94251	up	circRNA	TACAAAGGTGCCAAGATCCAGCCTACGCGGAACTCTCTCGCGGTAATTCGAAGTACCGCG	NA	circbase	NA	NA	NA	NA	NA	NA	NA	NA	NA	NA	NA	hsa_circ_0062892	chr22	31795538	31799190	+	3652	473	NM_004147	DRG1
hsa_circ_0008410	6.4076	P	1.09909	A	39.6297	39.6297	up	circRNA	TGACCATCAGTCATGCTCTGTGGGTGAGAGAGCCAGCCCAGAAAGGACTGTGCGGAGATT	NA	circbase	NA	NA	NA	NA	NA	NA	NA	NA	NA	NA	NA	hsa_circ_0008410	chr17	76396815	76397138	+	323	323	NM_024419	PGS1
hsa_circ_0088263	4.17691	P	5.50203	P	0.399115	2.50554	down	circRNA	TTCAAGTGTCTGGAGCCCGACGGTCTCTACAAGAGGAATCAGCTTTGGGAGAGCCAAGGG	NA	circbase	NA	NA	NA	NA	NA	NA	NA	NA	NA	NA	NA	hsa_circ_0088263	chr9	119249637	119858430	-	608793	2329	NM_014010	ASTN2
hsa_circ_0088086	3.85331	P	2.8264	A	2.03765	2.03765	up	circRNA	GGCACAATCTATACTGCTGCTGAAGAAAGAGGCTGGCAGGATGTACAGTTTTTATCACAG	NA	circbase	NA	NA	NA	NA	NA	NA	NA	NA	NA	NA	NA	hsa_circ_0088086	chr9	115166274	115166438	+	164	164	NM_032303	HSDL2
hsa_circ_0006738	3.87136	P	2.64865	A	2.33385	2.33385	up	circRNA	ATAATCTATATGCAATTTCGGTTGTAGATGAGCATGAGAGTGTGGAGCAGAGTCGGCGAG	NA	circbase	NA	NA	NA	NA	NA	NA	NA	NA	NA	NA	NA	hsa_circ_0006738	chr17	58258684	58263012	-	4328	906	NM_032582	USP32
hsa_circ_0076759	1.20516	A	6.84848	P	0.0200076	49.9811	down	circRNA	ATTTCTCACCTTTGACAAACAGAAAACAGCCTTCCACAGAAGTCAGACGCTGAGCTACAG	NA	circbase	NA	NA	NA	NA	NA	NA	NA	NA	NA	NA	NA	hsa_circ_0076759	chr6	52288743	52317635	+	28892	660	NM_018100	EFHC1
hsa_circ_0077492	7.16875	P	6.14359	P	2.03518	2.03518	up	circRNA	ACGAACTCAGATCGGACAGCTGGCTTTTAAAGGAATGAAGAGACTCAATAGAATCCAGTC	NA	circbase	NA	NA	NA	NA	NA	NA	NA	NA	NA	NA	NA	hsa_circ_0077492	chr6	101214440	101215221	-	781	342	NM_006828	ASCC3
hsa_circ_0073268	4.03199	P	2.65131	A	2.6039	2.6039	up	circRNA	ATGTTTGAACTTTTCATGAAGAGAAGACATGGAGAAGAGGAGGGAGTAGTTGTGACCGTG	NA	circbase	NA	NA	NA	NA	NA	NA	NA	NA	NA	NA	NA	hsa_circ_0073268	chr5	87583252	87588460	+	5208	5208	TCONS_00010018	TCONS_00010018
hsa_circ_0014494	3.69489	P	1.73427	A	3.89229	3.89229	up	circRNA	GCACACCGAGACCAGCATGAAGAACATGGAGAAGGAACTGCTGTGCCCAGTGTGTCAAGA	NA	circbase	NA	NA	NA	NA	NA	NA	NA	NA	NA	NA	NA	hsa_circ_0014494	chr1	155147861	155149766	+	1905	846	NM_025058	TRIM46
hsa_circ_0025353	3.29365	P	1.22559	A	4.19322	4.19322	up	circRNA	GTACACGACAGTGTTCTATTACTCAACAGGAATCTTCAAGGATGCAGGTGTTCAAGAGCC	NA	circbase	NA	NA	NA	NA	NA	NA	NA	NA	NA	NA	NA	hsa_circ_0025353	chr12	8071823	8078544	-	6721	2815	NM_006931	SLC2A3
hsa_circ_0010657	4.37482	P	12.1204	M	0.00465954	214.614	down	circRNA	ACATATGGGCTCATGGACAGCCACGCGGTGCTGCAGGGTCTCTGGCATCAGCATGGACGT	NA	circbase	NA	NA	NA	NA	NA	NA	NA	NA	NA	NA	NA	hsa_circ_0010657	chr1	22167593	22201495	-	33902	6211	NM_005529	HSPG2
hsa_circ_0053730	4.98413	P	2.77728	A	4.61666	4.61666	up	circRNA	ATGTTCTTGACAGAGTGTCAGGACACTCTGTTCCTGCAGTTTTGCAGAGCACATTTCATG	NA	circbase	NA	NA	NA	NA	NA	NA	NA	NA	NA	NA	NA	hsa_circ_0053730	chr2	32694462	32744013	+	49551	5496	NM_016252	BIRC6
hsa_circ_0012109	3.94606	P	13.6522	P	0.00119715	835.318	down	circRNA	TCTACAAGGAGAGAGTGACAATCTGATCAAAGCCATCTTGTCAGTCACCAAAGAGTACCG	NA	circbase	NA	NA	NA	NA	NA	NA	NA	NA	NA	NA	NA	hsa_circ_0012109	chr1	44363906	44365399	+	1493	347	NM_174963	ST3GAL3
hsa_circ_0079584	3.14712	A	4.3072	P	0.447489	2.23469	down	circRNA	TTCATCATTTAGGTGCAGTGCTGGATAGTTTACTAGTCCAGTATGGAGTGGTGGAGAGCT	NA	circbase	NA	NA	NA	NA	NA	NA	NA	NA	NA	NA	NA	hsa_circ_0079584	chr7	23349827	23401360	-	51533	3608	NM_006547	IGF2BP3
hsa_circ_0080928	2.45215	A	4.33533	P	0.271085	3.68888	down	circRNA	TCAGGCCAGATTTTAACAGCAATGCTCAGGATGTAAGCTGTTTTCAGCACCTTGTCCAAG	NA	circbase	NA	NA	NA	NA	NA	NA	NA	NA	NA	NA	NA	hsa_circ_0080928	chr7	81613950	81667551	-	53601	994	NM_000722	CACNA2D1
hsa_circ_0012219	1.24177	A	3.81591	P	0.167921	5.95518	down	circRNA	TTAAAAATAAAGTCAGTGTTACAGGTGAACTGCCTGATAAAGAGGGATGAGAATGGTTAC	NA	circbase	NA	NA	NA	NA	NA	NA	NA	NA	NA	NA	NA	hsa_circ_0012219	chr1	45809554	45813672	-	4118	2133	NM_007170	TESK2
hsa_circ_0026050	8.30699	P	5.65081	P	6.30362	6.30362	up	circRNA	GAAACTACAGTACTTCATCGGGAACATGCTGCTGAGTCTCTTGGCCAGCTCTGTCTTCCT	NA	circbase	NA	NA	NA	NA	NA	NA	NA	NA	NA	NA	NA	hsa_circ_0026050	chr12	49166077	49167430	-	1353	345	NM_015270	ADCY6
hsa_circ_0020421	1.75919	A	3.68882	P	0.262496	3.80958	down	circRNA	GACGAGATTCTGAACTCATTGGTATATTTCCTGCTTCATATATTCATCTTAAAGAAGCGA	NA	circbase	NA	NA	NA	NA	NA	NA	NA	NA	NA	NA	NA	hsa_circ_0020421	chr10	128780181	128926028	+	145847	2613	NM_001380	DOCK1
hsa_circ_0013249	5.57655	P	4.46728	P	2.15737	2.15737	up	circRNA	TTTAGTGCAAGTGGTTCTTTGAAGCTCTGAAGTATCCCAAGTTTTCTAAAGCTATCGTTA	NA	circbase	NA	NA	NA	NA	NA	NA	NA	NA	NA	NA	NA	hsa_circ_0013249	chr1	95657105	95663161	+	6056	6056	NM_001199679	TMEM56
hsa_circ_0036094	4.10809	P	2.16943	A	3.83351	3.83351	up	circRNA	TGCTGCACAGATAACTGAACTGCTTAATGATGTGGAAAGATTAAAACAGGCACTCAATGG	NA	circbase	NA	NA	NA	NA	NA	NA	NA	NA	NA	NA	NA	hsa_circ_0036094	chr15	70952489	70957153	-	4664	219	NM_001008224	UACA
hsa_circ_0043888	3.77795	P	2.4465	A	2.51655	2.51655	up	circRNA	GTTCCAATAAAGCAGAGTGGCAGAGCCCCAGTGGACTACTTCCCACTGACAGAGCAGAAG	NA	circbase	NA	NA	NA	NA	NA	NA	NA	NA	NA	NA	NA	hsa_circ_0043888	chr17	40849291	40852011	+	2720	1764	NM_003632	CNTNAP1
hsa_circ_0076312	2.84503	A	3.92961	P	0.471528	2.12077	down	circRNA	TAAAAAACATTTGAAATAAATACCGCACACAAAGGCAGGGGAGACTGGACTCGACCGAAC	NA	circbase	NA	NA	NA	NA	NA	NA	NA	NA	NA	NA	NA	hsa_circ_0076312	chr6	41754499	41757634	+	3135	3135	NM_013397	PRICKLE4
hsa_circ_0045171	2.91683	A	3.93514	P	0.493697	2.02554	down	circRNA	AGGTGACCAATACAGCATGGAAGTACAGGATGAAAATCAGGTGATGCTGAACAGGAGCTT	NA	circbase	NA	NA	NA	NA	NA	NA	NA	NA	NA	NA	NA	hsa_circ_0045171	chr17	61271351	61271500	+	149	149	NM_025185	TANC2
hsa_circ_0034780	2.43792	A	4.53878	P	0.233119	4.28965	down	circRNA	TGGTGTGTAAGAAGAAGATTGGGAACAGATATTTACTGAAGATCTCCCGGAAGTGGAGTC	NA	circbase	NA	NA	NA	NA	NA	NA	NA	NA	NA	NA	NA	hsa_circ_0034780	chr15	42453879	42458014	-	4135	872	NM_015289	VPS39
hsa_circ_0075189	3.02529	A	4.49628	P	0.360735	2.77212	down	circRNA	TTACTCGTTTTGTCCAACGTAAGTGGCGGTGGAAATCGCAAAGGCAAAAGCAAGAAATGG	NA	circbase	NA	NA	NA	NA	NA	NA	NA	NA	NA	NA	NA	hsa_circ_0075189	chr5	176857872	176869850	+	11978	2740	NM_002082	GRK6
hsa_circ_0013881	10.1618	P	6.89084	P	9.65266	9.65266	up	circRNA	AGATCTGAACATCCCTGATACCCCAGAAGGCCTCTGGGAACATCCTTCAAAGGAAAATAT	NA	circbase	NA	NA	NA	NA	NA	NA	NA	NA	NA	NA	NA	hsa_circ_0013881	chr1	145439777	145440788	+	1011	665	NM_006472	TXNIP
hsa_circ_0076839	4.08837	P	1.95596	A	4.38452	4.38452	up	circRNA	AATCTTCAAAGGCAATTAGAAGAGACCAAGGCCCAACACGAGAAGATCATCTCTCAGCAC	NA	circbase	NA	NA	NA	NA	NA	NA	NA	NA	NA	NA	NA	hsa_circ_0076839	chr6	56456979	56458991	-	2012	708	NM_015548	DST
hsa_circ_0086363	3.6146	P	4.64642	P	0.489095	2.04459	down	circRNA	AATTAAAATATATCAGGGCTTAGTTAACCTCAGAGCCACAGACGTCAGGCTCATGCGCCA	NA	circbase	NA	NA	NA	NA	NA	NA	NA	NA	NA	NA	NA	hsa_circ_0086363	chr9	12821384	12823059	+	1675	1675	NM_203403	C9orf150
hsa_circ_0085102	3.46899	P	1.21592	A	4.76695	4.76695	up	circRNA	GATTAAATTACTCTGCAAGTGAGTCTGGTTCTCAAAGCACTTGTGATCCACTTGTGACTC	NA	circbase	NA	NA	NA	NA	NA	NA	NA	NA	NA	NA	NA	hsa_circ_0085102	chr8	100789002	100889808	+	100806	6661	NM_017890	VPS13B
hsa_circ_0048852	1.11058	A	6.47703	P	0.0242403	41.2536	down	circRNA	TCACTTCTAGGGCTTTTTGGATTTTGGAACTGGGGACTCAAAGTCAAGTGCTTCTTACGG	NA	circbase	NA	NA	NA	NA	NA	NA	NA	NA	NA	NA	NA	hsa_circ_0048852	chr19	6583134	6583489	-	355	355	---	---
hsa_circ_0078726	6.61646	P	5.29161	P	2.50508	2.50508	up	circRNA	ACACAGACACTGTCACTGGAGTGGCCTTCAACCCATCAGCGCCCCAGGAGATGGGCAGTG	NA	circbase	NA	NA	NA	NA	NA	NA	NA	NA	NA	NA	NA	hsa_circ_0078726	chr6	169982931	170043882	-	60951	866	NM_182552	WDR27
hsa_circ_0004581	6.48906	P	5.16547	P	2.50288	2.50288	up	circRNA	CATGTTCAAAATCAAGCACTGCGCCTAGCAGAAATTTTACTACCTCTCCAAAATCATCAG	NA	circbase	NA	NA	NA	NA	NA	NA	NA	NA	NA	NA	NA	hsa_circ_0004581	chr3	49343147	49349087	-	5940	433	NM_003363	USP4
hsa_circ_0085097	4.1807	P	2.78307	A	2.63469	2.63469	up	circRNA	CTACAGATTAAAGACTTTCTGAATGGACCAGATCTCTAAACAAGAACAGAAAAAAGTGGA	NA	circbase	NA	NA	NA	NA	NA	NA	NA	NA	NA	NA	NA	hsa_circ_0085097	chr8	100654038	100673719	+	19681	826	NM_017890	VPS13B
hsa_circ_0049642	10.4353	P	11.5051	P	0.476394	2.0991	down	circRNA	ATTAAATTTTGTGTCTCCGTTTGCAGACAAGCCAGGATGCACGCTTTTATGCTCTGTCGG	NA	circbase	NA	NA	NA	NA	NA	NA	NA	NA	NA	NA	NA	hsa_circ_0049642	chr19	13050241	13055304	+	5063	1638	NM_004343	CALR
hsa_circ_0032019	6.20999	P	4.57001	P	3.11662	3.11662	up	circRNA	AAATTGCTGCTGGATCTAGATAGGTAAAGGAAAACATGCCTGCCACACGGAAGCCAATGA	NA	circbase	NA	NA	NA	NA	NA	NA	NA	NA	NA	NA	NA	hsa_circ_0032019	chr14	55477026	55493521	-	16495	357	NM_007086	WDHD1
hsa_circ_0058318	4.73946	P	3.53537	A	2.30391	2.30391	up	circRNA	TTTCCCCAAGGGCACTGAAGGCTTTGTGGAACTACCTGAGCCAGAAGGGAGTCAATAGCG	NA	circbase	NA	NA	NA	NA	NA	NA	NA	NA	NA	NA	NA	hsa_circ_0058318	chr2	219613558	219614110	+	552	234	NM_014640	TTLL4
hsa_circ_0027747	7.2598	P	4.76217	P	5.64759	5.64759	up	circRNA	TATGTATTCAAAGCAGAGGATGCTCATTCGGCTCAGAAAGATAAAGAAGCCACCAGTGGC	NA	circbase	NA	NA	NA	NA	NA	NA	NA	NA	NA	NA	NA	hsa_circ_0027747	chr12	95478273	95605043	-	126770	4240	NM_018351	FGD6
hsa_circ_0039415	2.61535	A	3.99136	P	0.385284	2.59549	down	circRNA	AGTTTTATGAGTGCCTTCTTGATCCCGTACACACTGTTCCTTATCATCGCGGGGATGCCC	NA	circbase	NA	NA	NA	NA	NA	NA	NA	NA	NA	NA	NA	hsa_circ_0039415	chr16	55703476	55706087	+	2611	370	NM_001172501	SLC6A2
hsa_circ_0017911	4.01833	P	2.78013	A	2.35904	2.35904	up	circRNA	TGTGTTACTTATTCCTGTTATTGGACCCAGCAGTTTAATGGATTAAGTGTTCCTATTCTT	NA	circbase	NA	NA	NA	NA	NA	NA	NA	NA	NA	NA	NA	hsa_circ_0017911	chr10	18931404	18931484	-	80	80	NM_182543	NSUN6
hsa_circ_0085035	3.39191	P	2.34917	A	2.06012	2.06012	up	circRNA	CCACCCAGCATTGAAAAATCTAAGTTTAGAAGAACTACAGATGCGGTTAAAAGCACTGGA	NA	circbase	NA	NA	NA	NA	NA	NA	NA	NA	NA	NA	NA	hsa_circ_0085035	chr8	99466860	99468228	-	1368	1368	NM_006281	STK3
hsa_circ_0015879	5.46744	P	3.23341	A	4.70445	4.70445	up	circRNA	AAGCAAGTTAGGCTTGCAGGTCTATCAGCTGGGAGGCATCTGCAAGCTGGTGGACCTCCT	NA	circbase	NA	NA	NA	NA	NA	NA	NA	NA	NA	NA	NA	hsa_circ_0015879	chr1	201286699	201297996	+	11297	1430	NM_000299	PKP1
hsa_circ_0006046	2.40559	A	3.76509	P	0.389715	2.56597	down	circRNA	CCAGAGAAGCTGGGTGAATTTGGAAGTGAAAAGAAAACTGCTTTGCATGAAAAAGAGGAG	NA	circbase	NA	NA	NA	NA	NA	NA	NA	NA	NA	NA	NA	hsa_circ_0006046	chr21	47801608	47811291	+	9683	1051	NM_006031	PCNT
hsa_circ_0082541	7.22029	P	5.61867	P	3.03484	3.03484	up	circRNA	TATGCAGCAGGAATATTAAGTGAACTTGACGTTGATGTAAATGAAGGGTCTCTAATGGAG	NA	circbase	NA	NA	NA	NA	NA	NA	NA	NA	NA	NA	NA	hsa_circ_0082541	chr7	135320328	135322807	+	2479	206	NM_015135	NUP205
hsa_circ_0085657	6.77659	P	8.0102	P	0.425255	2.35153	down	circRNA	TCCCCGCAGGGAGCAGGACATCGAGACTTTACATGGCTCTGTTCACGTCACGCTGTGTGG	NA	circbase	NA	NA	NA	NA	NA	NA	NA	NA	NA	NA	NA	hsa_circ_0085657	chr8	134274289	134276895	-	2606	227	NM_001135242	NDRG1
hsa_circ_0083910	6.36457	P	4.48501	P	3.67961	3.67961	up	circRNA	AAGAAGTTACAATTATATGGGGGTGTTTCTGTGGCCTGGGACTGGTTAGCACCAACAAGT	NA	circbase	NA	NA	NA	NA	NA	NA	NA	NA	NA	NA	NA	hsa_circ_0083910	chr8	33408561	33416289	-	7728	245	NM_024787	RNF122
hsa_circ_0022363	3.2672	A	4.3064	P	0.486599	2.05508	down	circRNA	CTATGAAGTTGAAAAATAAAGTTAATTTTGACCAAAAGAGGGGCCCCCGCCAGTTGGTGG	NA	circbase	NA	NA	NA	NA	NA	NA	NA	NA	NA	NA	NA	hsa_circ_0022363	chr11	61567096	61578351	-	11255	3506	NM_013402	FADS1
hsa_circ_0074608	2.258	A	4.27414	P	0.247219	4.045	down	circRNA	CATGATCAAGGACCTATACGAGGCAGGGGAACTGAAATGGGGAACAGATGAAGCCCAGTT	NA	circbase	NA	NA	NA	NA	NA	NA	NA	NA	NA	NA	NA	hsa_circ_0074608	chr5	150508967	150512748	-	3781	372	NM_001155	ANXA6
hsa_circ_0069631	4.29447	P	3.15809	A	2.19829	2.19829	up	circRNA	AAATAAGTTAGTTTGAACTTGTTCTGGAAGCTGTGCGTCACCGTAATGAGGCTTGTAATT	NA	circbase	NA	NA	NA	NA	NA	NA	NA	NA	NA	NA	NA	hsa_circ_0069631	chr4	44704167	44724259	-	20092	1796	NM_138335	GNPDA2
hsa_circ_0061855	4.02833	P	2.80959	A	2.32743	2.32743	up	circRNA	GCAGTCCCAGATGCAAGTAGTAACAGAGTTAAAGACAGAACAAGATCCAAACTGCTCTGA	NA	circbase	NA	NA	NA	NA	NA	NA	NA	NA	NA	NA	NA	hsa_circ_0061855	chr21	44427600	44433348	+	5748	471	NM_004571	PKNOX1
hsa_circ_0010859	1.15398	A	4.08941	P	0.130722	7.64984	down	circRNA	CTCTAATAAAGGATTGGGGGGTCAGTTAATTCGAAGAGTCTGGCAGAAAAGGAAGTGTGG	NA	circbase	NA	NA	NA	NA	NA	NA	NA	NA	NA	NA	NA	hsa_circ_0010859	chr1	23755055	23765723	-	10668	3061	NM_017707	ASAP3
hsa_circ_0059147	5.57724	P	6.61083	P	0.488495	2.0471	down	circRNA	TTTACCTGTGCCTAATAAAGGAGAATTATGAAATAAGTGTACCCCGTCCAGGAAGCCCTG	NA	circbase	NA	NA	NA	NA	NA	NA	NA	NA	NA	NA	NA	hsa_circ_0059147	chr20	371930	378203	+	6273	1655	NM_021158	TRIB3
hsa_circ_0060519	4.79466	P	6.28647	P	0.355567	2.81241	down	circRNA	CACCTATCGGCCAACATTGGTACTCAGACCACAGGACCCAGTGGGGTAGGATGCTGTACA	NA	circbase	NA	NA	NA	NA	NA	NA	NA	NA	NA	NA	NA	hsa_circ_0060519	chr20	43564031	43564138	+	107	107	NM_001124756	PABPC1L
hsa_circ_0085647	6.57705	P	7.68194	P	0.464937	2.15083	down	circRNA	ATGGGATACAGAAGAAATGCAGAGTAACGTGGAAGTGGTCCACACCTACCGCCAGCACAT	NA	circbase	NA	NA	NA	NA	NA	NA	NA	NA	NA	NA	NA	hsa_circ_0085647	chr8	134254265	134262786	-	8521	349	NM_001135242	NDRG1
hsa_circ_0053283	3.41124	P	1.81789	A	3.01749	3.01749	up	circRNA	AATATGCTATGTTCCTGGAGGATGAGGTGCTTTTCTGCTTTGGGCCAAGTAGCAAAAGCT	NA	circbase	NA	NA	NA	NA	NA	NA	NA	NA	NA	NA	NA	hsa_circ_0053283	chr2	27677433	27686048	-	8615	1528	NM_015662	IFT172
hsa_circ_0019026	5.26937	P	3.76242	P	2.84209	2.84209	up	circRNA	CAGTGATGAAGGATCGTGGAAGAATACCAATTGCCATATTACAACATGGTACCGAGTGAT	NA	circbase	NA	NA	NA	NA	NA	NA	NA	NA	NA	NA	NA	hsa_circ_0019026	chr10	88683132	88683263	+	131	131	NM_004329	BMPR1A
hsa_circ_0073835	3.65774	P	2.38542	A	2.41549	2.41549	up	circRNA	CTATCTTTCTTTCAGAAACGATTGCCAGATGTTGGTATATCCTACTTTCTGGATCTGTGC	NA	circbase	NA	NA	NA	NA	NA	NA	NA	NA	NA	NA	NA	hsa_circ_0073835	chr5	130883739	130928159	-	44420	298	NM_001164386	RAPGEF6
hsa_circ_0002413	4.23246	P	1.89147	A	5.06647	5.06647	up	circRNA	TGTCCAGAAGCAAGATCAACTTTATACCTGGGCTGCAGTTAGTCAACCCACACACTCATT	NA	circbase	NA	NA	NA	NA	NA	NA	NA	NA	NA	NA	NA	hsa_circ_0002413	chr1	240341220	240351562	+	10342	204	NM_020066	FMN2
hsa_circ_0061293	3.7095	P	2.6866	A	2.03199	2.03199	up	circRNA	GACACCAGAGCAAGATGTGAGTGAGTTTACACACAAATTATTAGATTGGTTAGAAGATGC	NA	circbase	NA	NA	NA	NA	NA	NA	NA	NA	NA	NA	NA	hsa_circ_0061293	chr21	17181127	17199522	+	18395	913	NM_013396	USP25
hsa_circ_0052197	4.40585	P	5.45689	P	0.482622	2.07201	down	circRNA	GAGAGTGCAGCTCCCAACCCAGTGAGGAACCTGAGAGTGGAGGCTCAGACCAACAGCTCC	NA	circbase	NA	NA	NA	NA	NA	NA	NA	NA	NA	NA	NA	hsa_circ_0052197	chr19	55707889	55716960	-	9071	1905	NM_002842	PTPRH
hsa_circ_0090911	4.54081	P	1.11539	A	10.7437	10.7437	up	circRNA	AATCTACTACTGTCTGGCCACTGGCTGCTGAGCCTGAGTGGCTTCCAGCTTCTTAAAGTC	NA	circbase	NA	NA	NA	NA	NA	NA	NA	NA	NA	NA	NA	hsa_circ_0090911	chrX	65392196	65428088	+	35892	2396	NM_138737	HEPH
hsa_circ_0045780	1.81696	A	5.99326	P	0.0553105	18.0797	down	circRNA	ATATCCGAAAGGACACACTGAGGCTCGTCAAGAAGCTATTTTGCCAGCCACTTCATTATG	NA	circbase	NA	NA	NA	NA	NA	NA	NA	NA	NA	NA	NA	hsa_circ_0045780	chr17	74169782	74208563	-	38781	208	NM_052916	RNF157
hsa_circ_0075516	3.40978	P	1.98501	A	2.68472	2.68472	up	circRNA	CCAGAAGACATGAGCTAAGTTATAGGTAAAAGCTATGACTATGGTATAGATATGTGGTCT	NA	circbase	NA	NA	NA	NA	NA	NA	NA	NA	NA	NA	NA	hsa_circ_0075516	chr6	4057269	4063353	+	6084	2946	NM_003913	PRPF4B
hsa_circ_0002369	2.6648	A	6.55851	P	0.0672783	14.8636	down	circRNA	AGGGTTGCAAGAATCAGTCTTTGCATTTGCATCTCAAACACTATGGCGTGAATTGTGATG	NA	circbase	NA	NA	NA	NA	NA	NA	NA	NA	NA	NA	NA	hsa_circ_0002369	chr21	34066537	34067592	-	1055	310	NM_203446	SYNJ1
hsa_circ_0071397	7.23378	P	6.18873	P	2.06345	2.06345	up	circRNA	AAAGATTTTGCATTCAACATTCAGGCTATCAGGTCATCCTGCGCACAGTCGGTGTTAGTG	NA	circbase	NA	NA	NA	NA	NA	NA	NA	NA	NA	NA	NA	hsa_circ_0071397	chr4	169282299	169292914	-	10615	215	NM_001012967	DDX60L
hsa_circ_0068444	7.3057	P	8.3341	P	0.490254	2.03976	down	circRNA	TTTTTCATGAGTTCTGTCAGATAGTGAGAAACGGAAACAGTACGATACTTATGGTGAAGA	NA	circbase	NA	NA	NA	NA	NA	NA	NA	NA	NA	NA	NA	hsa_circ_0068444	chr3	186293628	186303589	+	9961	1244	NM_016306	DNAJB11
hsa_circ_0023966	2.30676	A	3.56279	P	0.418695	2.38837	down	circRNA	TTCCGCAGGCCCCGGGGATGGCCTTTACCCTTGAAGAAAGGCTGCAGCTTGGAATCCACG	NA	circbase	NA	NA	NA	NA	NA	NA	NA	NA	NA	NA	NA	hsa_circ_0023966	chr11	86267594	86270865	-	3271	284	NM_001161586	ME3
hsa_circ_0046745	4.79939	P	3.60803	P	2.28368	2.28368	up	circRNA	CTCTCCAAGCCTTTTTGCACATTATATTTGGTATGCTGTTAGGAGACACCATTATTTTGG	NA	circbase	NA	NA	NA	NA	NA	NA	NA	NA	NA	NA	NA	hsa_circ_0046745	chr18	2778166	2805015	+	26849	3007	NM_015295	SMCHD1
hsa_circ_0074622	4.02411	P	2.73177	A	2.44924	2.44924	up	circRNA	TTTCATTTGAAGGCATTGGAATGCTGCCATGTCCACGCAGAGACTTCGGAATGAAGACTA	NA	circbase	NA	NA	NA	NA	NA	NA	NA	NA	NA	NA	NA	hsa_circ_0074622	chr5	150838348	150853332	+	14984	827	NM_078483	SLC36A1
hsa_circ_0025426	2.83107	A	3.98569	P	0.449184	2.22626	down	circRNA	AACATTCAACTCCCTACTTTGTCCATCAGGTCAATTACAAGGATCGTAGTCCCTGTTACG	NA	circbase	NA	NA	NA	NA	NA	NA	NA	NA	NA	NA	NA	hsa_circ_0025426	chr12	9241795	9254270	-	12475	1504	NM_000014	A2M
hsa_circ_0072182	3.57964	P	2.28394	A	2.45496	2.45496	up	circRNA	AGTATCTAGATATAAGCCTTTGAAAAAAAGAAAACAAGATTCTTACCCACAGGAGGCTGG	NA	circbase	NA	NA	NA	NA	NA	NA	NA	NA	NA	NA	NA	hsa_circ_0072182	chr5	36984777	37061120	+	76343	6365	NM_015384	NIPBL
hsa_circ_0030117	4.06814	P	8.84714	P	0.0364233	27.4549	down	circRNA	GCTCTATCAGGATCATACCAAAAAAGAGTTGGATTCTTGGAAAATTGTCCGAGTTAGTGA	NA	circbase	NA	NA	NA	NA	NA	NA	NA	NA	NA	NA	NA	hsa_circ_0030117	chr13	42439871	42461497	-	21626	774	NM_015058	KIAA0564
hsa_circ_0058265	5.90653	P	11.9289	M	0.0153848	64.9994	down	circRNA	TAACTTAGACAGCTGAGTTGATGGCTTCCGGAGAACTGGCATAGCTGCAGAATATGAGTA	NA	circbase	NA	NA	NA	NA	NA	NA	NA	NA	NA	NA	NA	hsa_circ_0058265	chr2	219394678	219427536	-	32858	1092	NM_020935	USP37
hsa_circ_0031002	7.74699	P	8.92399	M	0.442272	2.26105	down	circRNA	AATAAAAAGCCTCTTTCTTTTAGACACGCTGTGAACAAGACAGGCCTTCCCCAACCACAG	NA	circbase	NA	NA	NA	NA	NA	NA	NA	NA	NA	NA	NA	hsa_circ_0031002	chr13	113973783	113977741	+	3958	1697	NM_005561	LAMP1
hsa_circ_0003561	4.02903	P	2.70727	A	2.4997	2.4997	up	circRNA	GATCTTTCAGGTGCTTTTCAGTGGGAAGAATTGGAAGAAGATATCAGGAAGAAGTTGAAA	NA	circbase	NA	NA	NA	NA	NA	NA	NA	NA	NA	NA	NA	hsa_circ_0003561	chr5	95099211	95124562	+	25351	672	NM_014899	RHOBTB3
hsa_circ_0078116	3.89245	P	2.64019	A	2.38214	2.38214	up	circRNA	GAAAAAATCATGCTCATCCTAATGTCCAAAAGGTGGTGCTAGTATCATCTGCGTCAGATA	NA	circbase	NA	NA	NA	NA	NA	NA	NA	NA	NA	NA	NA	hsa_circ_0078116	chr6	144869775	145069650	+	199875	1613	NM_007124	UTRN
hsa_circ_0018501	3.69477	P	2.67838	A	2.02285	2.02285	up	circRNA	GTCATTGTGGGAGATAATAGTACATTTAAATCAAACGGTATTGAGATGGATTGGGTTATG	NA	circbase	NA	NA	NA	NA	NA	NA	NA	NA	NA	NA	NA	hsa_circ_0018501	chr10	70096955	70102953	+	5998	2206	NM_012207	HNRNPH3
hsa_circ_0032840	7.33077	P	8.37818	P	0.483835	2.06682	down	circRNA	GAATCATCAGTTGCTAGTGATATCTCGCTAACAGGAGGCTCAGTAGTACAGAGAATACGG	NA	circbase	NA	NA	NA	NA	NA	NA	NA	NA	NA	NA	NA	hsa_circ_0032840	chr14	81961424	81964390	-	2966	212	NM_005065	SEL1L
hsa_circ_0071341	1.26076	A	12.2991	M	0.000475469	2103.19	down	circRNA	AATTAGGTGTCGTACTGGGGTCAACTGATGAGACATTCAGCTTGGCTGAAGAAACCTGTA	NA	circbase	NA	NA	NA	NA	NA	NA	NA	NA	NA	NA	NA	hsa_circ_0071341	chr4	159780208	159817017	+	36809	2409	NM_020840	FNIP2
hsa_circ_0035527	3.78197	P	2.68667	A	2.13657	2.13657	up	circRNA	TCTTGGTAGATCTCATCGAGGGCGCCTCTGCAGAGCAGAAACACAGCCTTGGCATCACCA	NA	circbase	NA	NA	NA	NA	NA	NA	NA	NA	NA	NA	NA	hsa_circ_0035527	chr15	59510089	59517022	-	6933	465	NM_004998	MYO1E
hsa_circ_0076715	6.70115	P	3.47091	P	9.38422	9.38422	up	circRNA	GTTCCTGACTGCCTCTGACATTGGAGCATCAATGACGATCCATGCCTTTGGGGCCTACTT	NA	circbase	NA	NA	NA	NA	NA	NA	NA	NA	NA	NA	NA	hsa_circ_0076715	chr6	49580109	49583484	-	3375	453	NM_000324	RHAG
hsa_circ_0045753	10.393	P	13.5959	M	0.108603	9.20785	down	circRNA	ACCCAGTGATCCCAATAAACGAATTCTGTCTCCCCGTGGGAGAAGGTGGTGCAGGATGCC	NA	circbase	NA	NA	NA	NA	NA	NA	NA	NA	NA	NA	NA	hsa_circ_0045753	chr17	74002926	74010657	-	7731	4137	NM_001988	EVPL
hsa_circ_0017537	8.49193	P	7.42967	P	2.0882	2.0882	up	circRNA	TCTTCACCTAGTGGAATGTCATCCTTACTTCAACCAGAGAAAACTGCTGGATTTCTGCAA	NA	circbase	NA	NA	NA	NA	NA	NA	NA	NA	NA	NA	NA	hsa_circ_0017537	chr10	5014392	5020158	+	5766	626	NM_001353	AKR1C1
hsa_circ_0001784	5.28123	P	7.53148	P	0.210188	4.75764	down	circRNA	GTGATATCAGGTATTCTGAGAGAAGCCTCACAAAGTGTATTGGAATTACTATTGAAACCA	NA	circbase	NA	NA	NA	NA	NA	NA	NA	NA	NA	NA	NA	hsa_circ_0001784	chr8	27987018	28019595	+	32577	950	NM_018091	ELP3
hsa_circ_0088019	6.44332	P	12.1776	P	0.0187844	53.2358	down	circRNA	GACAAAAGAGTGCAAATTGGGAATCGTGAAATTCATAGAAGCTGAACAGGTGCCTGAACT	NA	circbase	NA	NA	NA	NA	NA	NA	NA	NA	NA	NA	NA	hsa_circ_0088019	chr9	114192826	114195652	-	2826	222	NM_001080398	KIAA0368
hsa_circ_0003908	4.07347	P	5.15663	P	0.471997	2.11866	down	circRNA	GCAAAAGCTGGATACAATGTAAAGCAGGCAACAATTGGCATTGACTTTTTATCAAAAACT	NA	circbase	NA	NA	NA	NA	NA	NA	NA	NA	NA	NA	NA	hsa_circ_0003908	chr11	73418464	73431944	-	13480	366	NM_002869	RAB6A
hsa_circ_0069608	1.09833	A	4.33009	P	0.106449	9.39416	down	circRNA	TTTGCTGTCGGACACTGTAATTTATGATCGACTGGCAGAGACGTCAAAATACAAAGAAAT	NA	circbase	NA	NA	NA	NA	NA	NA	NA	NA	NA	NA	NA	hsa_circ_0069608	chr4	42487512	42526864	-	39352	602	NM_006095	ATP8A1
hsa_circ_0070746	2.2491	A	4.0063	P	0.29582	3.38043	down	circRNA	GTATAATCTTATTTGTTGGACCAGATTCCAGACATGTTTGCAGACTCTAATGAAAATGAG	NA	circbase	NA	NA	NA	NA	NA	NA	NA	NA	NA	NA	NA	hsa_circ_0070746	chr4	119643977	119673244	-	29267	2178	NM_014822	SEC24D
hsa_circ_0068194	2.51385	A	4.01321	P	0.353708	2.82719	down	circRNA	GTCTGAATTTATTGGGGATGTCACACAGAAGCTGGATAGAACTTATACTGGCTTGCAGAC	NA	circbase	NA	NA	NA	NA	NA	NA	NA	NA	NA	NA	NA	hsa_circ_0068194	chr3	183465459	183524880	+	59421	3087	NM_018023	YEATS2
hsa_circ_0081172	1.11451	A	3.96215	P	0.138924	7.19821	down	circRNA	ATTCAATAAAGATTTAGTGGTTAAGTGCAACTCCTCGGTGCAACCTATATAAGGCTCACA	NA	circbase	NA	NA	NA	NA	NA	NA	NA	NA	NA	NA	NA	hsa_circ_0081172	chr7	94285636	94299006	+	13370	6617	NM_001184961	PEG10
hsa_circ_0057670	10.8374	P	12.6898	M	0.276942	3.61086	down	circRNA	TCAAAAAATTGGGAAGAACAGTGATTATTGAGCAGAGTTGGGGAAGTCCCAAAGTAACAA	NA	circbase	NA	NA	NA	NA	NA	NA	NA	NA	NA	NA	NA	hsa_circ_0057670	chr2	198353040	198362116	-	9076	1216	NM_002156	HSPD1
hsa_circ_0071351	3.43426	P	1.28535	A	4.43492	4.43492	up	circRNA	CCTCATGTTCAGGACTCGTATTTAAAGAACTTCTAACAAGATTGTCAGAAGAGAAAAGAA	NA	circbase	NA	NA	NA	NA	NA	NA	NA	NA	NA	NA	NA	hsa_circ_0071351	chr4	160253602	160264556	+	10954	1366	NM_014247	RAPGEF2
hsa_circ_0071874	2.86456	A	3.87249	P	0.497259	2.01102	down	circRNA	AAGAGTTTCTCACTCTTATTAAAGTGGCTACGCGGGGCAGCATCCTCTACTTCCTCATTA	NA	circbase	NA	NA	NA	NA	NA	NA	NA	NA	NA	NA	NA	hsa_circ_0071874	chr5	13735239	13736041	-	802	306	NM_001369	DNAH5
hsa_circ_0080395	6.72507	P	4.24989	P	5.56037	5.56037	up	circRNA	CGGAAATCAGGTTATCAGTTGATTGGGAGCCACTCGGGGGTGAAGCTTTGCAGGTGGACA	NA	circbase	NA	NA	NA	NA	NA	NA	NA	NA	NA	NA	NA	hsa_circ_0080395	chr7	66520821	66563705	+	42884	460	NM_018264	TYW1
hsa_circ_0086201	2.67824	A	3.79776	P	0.460246	2.17275	down	circRNA	TTAGATGCCGGTATGAAACAACTTCAAGTGATGATTCCAGCTCAGATGAAAGCTCTTCTT	NA	circbase	NA	NA	NA	NA	NA	NA	NA	NA	NA	NA	NA	hsa_circ_0086201	chr9	732377	738504	+	6127	548	NM_153186	KANK1
hsa_circ_0049653	8.04827	P	9.26985	P	0.428814	2.33201	down	circRNA	TAAATTTTGTGTCTCCGCAGCAGAGAAACAAATGAAGGACAAACAGGACGAGGAGCAGAG	NA	circbase	NA	NA	NA	NA	NA	NA	NA	NA	NA	NA	NA	hsa_circ_0049653	chr19	13054526	13055304	+	778	778	NM_004343	CALR
hsa_circ_0012714	5.78086	P	4.26001	P	2.8696	2.8696	up	circRNA	TTAAGGACTTGCAAATCATCACGGGGGAATTCTACCGGATCTATTACCTGAAGAAGTCGC	NA	circbase	NA	NA	NA	NA	NA	NA	NA	NA	NA	NA	NA	hsa_circ_0012714	chr1	56960418	56990226	-	29808	2443	NM_003713	PPAP2B
hsa_circ_0004373	3.40925	P	5.68778	P	0.206107	4.85185	down	circRNA	CTTGAGGATGGTTCTCAGGAATCAGATAGCTCGCAGTCGGCCAAGAAGGACATGCTGGCT	NA	circbase	NA	NA	NA	NA	NA	NA	NA	NA	NA	NA	NA	hsa_circ_0004373	chr10	13705452	13717044	-	11592	543	NM_018027	FRMD4A
hsa_circ_0082200	4.90498	P	2.78947	A	4.33344	4.33344	up	circRNA	GCGGGGCAAGGGGCCGGCACTGGCGATGTTGCTGTGGTGATCGTGGACCCACAGGGCCGG	NA	circbase	NA	NA	NA	NA	NA	NA	NA	NA	NA	NA	NA	hsa_circ_0082200	chr7	128478656	128482752	+	4096	1179	NM_001458	FLNC
hsa_circ_0088921	3.26566	P	2.19769	A	2.09648	2.09648	up	circRNA	ATCAGCATTGGGTTACCCACCACTGACGAAGATCCTGGCAAGTTTCTTTGGGGAGCTGCT	NA	circbase	NA	NA	NA	NA	NA	NA	NA	NA	NA	NA	NA	hsa_circ_0088921	chr9	131599080	131600646	-	1566	487	NM_004059	CCBL1
hsa_circ_0014653	3.78643	P	5.04693	P	0.417401	2.39578	down	circRNA	TCATCAGCCAGCAGAGGTAATCTACAGTGAGCTGATGAGTGACTTTGAGATGGATGAGAA	NA	circbase	NA	NA	NA	NA	NA	NA	NA	NA	NA	NA	NA	hsa_circ_0014653	chr1	155932723	155934922	-	2199	395	NM_001162383	ARHGEF2
hsa_circ_0085787	3.61149	P	1.12026	A	5.62256	5.62256	up	circRNA	GCCTTGACTGTAGGGATGTAAAGAATCATTTAAACTATGAACACAGAGTCTTTAATAGTG	NA	circbase	NA	NA	NA	NA	NA	NA	NA	NA	NA	NA	NA	hsa_circ_0085787	chr8	142173431	142178624	+	5193	923	NM_014957	DENND3
hsa_circ_0067038	2.99375	A	4.53828	P	0.342808	2.91708	down	circRNA	CAGTCTGAATAATGAAGTCGTACCAGCTGTACACACTTTTCATTGTGCTGTACCCAATGG	NA	circbase	NA	NA	NA	NA	NA	NA	NA	NA	NA	NA	NA	hsa_circ_0067038	chr3	123213362	123219540	-	6178	634	NM_198402	PTPLB
hsa_circ_0084184	3.32372	P	4.38011	P	0.480833	2.07972	down	circRNA	TTGTGCCTCGTTTGGATGACTTTAACAATTGGATTTCTAAAGCCATAAGTTCTCGAGAAA	NA	circbase	NA	NA	NA	NA	NA	NA	NA	NA	NA	NA	NA	hsa_circ_0084184	chr8	43024315	43037403	+	13088	565	NM_152419	HGSNAT
hsa_circ_0002205	1.75424	A	4.74795	P	0.125547	7.96517	down	circRNA	CAAGAGCCAAGTAAGGTACACAGATTTGAGGCTATGGACAGCAACCCTGAGCTGGCCAGT	NA	circbase	NA	NA	NA	NA	NA	NA	NA	NA	NA	NA	NA	hsa_circ_0002205	chr15	65110144	65111422	-	1278	341	NM_025049	PIF1
hsa_circ_0025442	1.22921	A	12.3657	M	0.000444196	2251.26	down	circRNA	AAGAAGGAACAGGTCCCAAAGTCTTCATCCAATGAGGAGGTAATGTTCCTCACTGTCCAA	NA	circbase	NA	NA	NA	NA	NA	NA	NA	NA	NA	NA	NA	hsa_circ_0025442	chr12	9259086	9265132	-	6046	724	NM_000014	A2M
hsa_circ_0019976	1.68978	A	3.77378	P	0.23586	4.23981	down	circRNA	CTCCTAGCTTTTGATAGGAAGAAAAGAAAGTTTATACCTGGTTAATTCGTCACTGAAAAC	NA	circbase	NA	NA	NA	NA	NA	NA	NA	NA	NA	NA	NA	hsa_circ_0019976	chr10	106045692	106048815	+	3123	3123	NM_183239	GSTO2
hsa_circ_0074933	1.97514	A	4.02667	P	0.241227	4.14547	down	circRNA	GTGTGCCCAGGCAACTGGACAACAACCACATCAGCTGCATTGAAGATGGAGCCTTCCGAG	NA	circbase	NA	NA	NA	NA	NA	NA	NA	NA	NA	NA	NA	hsa_circ_0074933	chr5	168244304	168271660	-	27356	308	NM_003062	SLIT3
hsa_circ_0054925	4.72511	P	5.84743	P	0.459353	2.17697	down	circRNA	GAGAGAGAAGATTTTCTATTATGAAATACCCGGCCCAATAAACAAGACAACAGAGCGACA	NA	circbase	NA	NA	NA	NA	NA	NA	NA	NA	NA	NA	NA	hsa_circ_0054925	chr2	63609040	63661070	-	52030	991	NM_015910	WDPCP
hsa_circ_0032344	2.76724	A	3.81888	P	0.482421	2.07288	down	circRNA	CATACCTTAAGTGTTGAGAATAATAGGCAGTCAGAAGGTCTGCATGCCAAAGGCAGAAGA	NA	circbase	NA	NA	NA	NA	NA	NA	NA	NA	NA	NA	NA	hsa_circ_0032344	chr14	69908548	69929107	+	20559	4657	NM_001252152	SLC39A9
hsa_circ_0025620	6.98062	P	5.66658	P	2.48636	2.48636	up	circRNA	ATTTCCTTGGGCTAATAGCTCGTCAGCTTGCTAAAATCCATGCTATTCATGCACACAATG	NA	circbase	NA	NA	NA	NA	NA	NA	NA	NA	NA	NA	NA	hsa_circ_0025620	chr12	22811947	22837490	+	25543	603	NM_018638	ETNK1
hsa_circ_0000110	3.88712	P	1.11167	A	6.84688	6.84688	up	circRNA	AAGGAGTAAGGAGAATTCTCACCAAATGTTCCCAAATCCTTATCCTCAGCTGTGAAGGTA	NA	circbase	NA	NA	NA	NA	NA	NA	NA	NA	NA	NA	NA	hsa_circ_0000110	chr1	114372213	114377061	-	4848	356	NM_015967	PTPN22
hsa_circ_0073244	7.21082	P	1.23255	A	63.0436	63.0436	up	circRNA	ATGGTTACAGATAAATTTGCAAAGGAAAATGAGAGTTACTGGTGTGATTACCCAAGGAGC	NA	circbase	NA	NA	NA	NA	NA	NA	NA	NA	NA	NA	NA	hsa_circ_0073244	chr5	83356118	83362425	-	6307	486	NM_005711	EDIL3
hsa_circ_0053932	4.85021	P	3.39358	A	2.74467	2.74467	up	circRNA	CAGTGTGAAGATATTGATGAATGTCAGCAAGGGAATCTATGTGTAAACGGGCAGTGCAAA	NA	circbase	NA	NA	NA	NA	NA	NA	NA	NA	NA	NA	NA	hsa_circ_0053932	chr2	33525517	33525640	+	123	123	NM_206943	LTBP1
hsa_circ_0045566	2.72358	A	4.11699	P	0.380664	2.62699	down	circRNA	ATGTTCTTCAATAAAGGAGCTGCGGCAGCCGCCGTCCTTGCACCTAAGGAACCTCTGCTG	NA	circbase	NA	NA	NA	NA	NA	NA	NA	NA	NA	NA	NA	hsa_circ_0045566	chr17	72773402	72787175	+	13773	494	NM_017728	TMEM104
hsa_circ_0032971	1.75687	A	3.93187	P	0.221442	4.51585	down	circRNA	TATCTGAGGATCAGTGATAAACATCAACGAATGTGAGCACAGGAACCACACGTGCAACCT	NA	circbase	NA	NA	NA	NA	NA	NA	NA	NA	NA	NA	NA	hsa_circ_0032971	chr14	92347635	92347762	-	127	127	NM_006329	FBLN5
hsa_circ_0000588	3.47123	P	1.86698	A	3.04038	3.04038	up	circRNA	TATCCAAAACTCTTAGAAGGCTTGCAAGGCCGGGAAGCACGTGGTGCACATCGCTTGCGG	NA	circbase	NA	NA	NA	NA	NA	NA	NA	NA	NA	NA	NA	hsa_circ_0000588	chr15	28508063	28511074	-	3011	478	NM_004667	HERC2
hsa_circ_0005715	3.01377	A	6.70708	P	0.0773044	12.9359	down	circRNA	TTGGTCAAAGTCCCTCAAGGAATGATACAAAAATCATCAAGAAAGAAGGTCCAGAAAAGA	NA	circbase	NA	NA	NA	NA	NA	NA	NA	NA	NA	NA	NA	hsa_circ_0005715	chr18	9208654	9239554	+	30900	18196	NM_001204056	ANKRD12
hsa_circ_0014152	3.52867	P	2.46877	A	2.0848	2.0848	up	circRNA	ATGCCTATCGCAAGATGTACAGAAATTTTCTGACAATGACAAGCTGTATCTCTACCTTCA	NA	circbase	NA	NA	NA	NA	NA	NA	NA	NA	NA	NA	NA	hsa_circ_0014152	chr1	151317203	151317664	-	461	203	NM_000449	RFX5
hsa_circ_0055066	5.67578	P	6.82852	P	0.449769	2.22337	down	circRNA	GGTAGAAGGCGTAGAACAGGTTCTGTCATATGTTGAAGAATCCATACACCATTAAGAAAC	NA	circbase	NA	NA	NA	NA	NA	NA	NA	NA	NA	NA	NA	hsa_circ_0055066	chr2	69627495	69659137	-	31642	658	NM_015700	NFU1
hsa_circ_0027627	2.83779	A	4.03157	P	0.437158	2.2875	down	circRNA	TGCAGTCCAGAGATGCAGGGAAGTTTTGCCTCTTCCTGAAAATTATATTATTAGCTTTTT	NA	circbase	NA	NA	NA	NA	NA	NA	NA	NA	NA	NA	NA	hsa_circ_0027627	chr12	78225068	78362482	+	137414	844	NM_014903	NAV3
hsa_circ_0076216	3.81186	P	4.92815	P	0.461281	2.16788	down	circRNA	AATAAAAACCTTTTGTCTTAATCCAGTCTAGGGAGGAAAGGGTGTGGGTGTCTGCTCCTG	NA	circbase	NA	NA	NA	NA	NA	NA	NA	NA	NA	NA	NA	hsa_circ_0076216	chr6	37140232	37143204	+	2972	2211	NM_002648	PIM1
hsa_circ_0090158	7.44279	P	3.97767	P	11.0434	11.0434	up	circRNA	TCAACCAGAGGTTTTTATGATAAGTTCATTTTGCTTCTGGACTTCAACAGTCTATATCCT	NA	circbase	NA	NA	NA	NA	NA	NA	NA	NA	NA	NA	NA	hsa_circ_0090158	chrX	24763534	24906239	+	142705	1598	NM_016937	POLA1
hsa_circ_0019528	1.20124	A	4.03146	P	0.140611	7.11184	down	circRNA	TAAATGTGGTTAAGCAATTGTGTGACACAGGAAGCCCAAGTGTTGGCCATCCTCAACGAA	NA	circbase	NA	NA	NA	NA	NA	NA	NA	NA	NA	NA	NA	hsa_circ_0019528	chr10	102672325	102703885	+	31560	3299	NM_018121	FAM178A
hsa_circ_0060943	4.79093	P	1.86013	A	7.62532	7.62532	up	circRNA	TCGTTTGAAAGTGGAGTACCACAAGAAGTATGGCAAGATTTTCCGCATGAAGTTGGGTTC	NA	circbase	NA	NA	NA	NA	NA	NA	NA	NA	NA	NA	NA	hsa_circ_0060943	chr20	52786130	52789638	-	3508	382	NM_000782	CYP24A1
hsa_circ_0048283	3.60138	P	2.52589	A	2.10744	2.10744	up	circRNA	TTTTGTTTGTTGGAGACCAACTTGAAGTTCAGACAGGCCCTGATGGTCACCCACAAAGAA	NA	circbase	NA	NA	NA	NA	NA	NA	NA	NA	NA	NA	NA	hsa_circ_0048283	chr19	1798759	1805455	-	6696	1935	NM_001178002	ATP8B3
hsa_circ_0024225	4.31944	P	2.88325	A	2.70606	2.70606	up	circRNA	TACTTATAAGATTGTTCCAGGACACGAAGGGAGATTCTTCCAGGTTACTGAAAGCACTTC	NA	circbase	NA	NA	NA	NA	NA	NA	NA	NA	NA	NA	NA	hsa_circ_0024225	chr11	108150217	108206688	+	56471	4984	NM_000051	ATM
hsa_circ_0014222	8.30992	P	5.72655	P	5.9934	5.9934	up	circRNA	TACCTGCAGAATAATAAAGTCATCAATACCTCAGTGGGGCAAGTCCGTGGGCATCATGTT	NA	circbase	NA	NA	NA	NA	NA	NA	NA	NA	NA	NA	NA	hsa_circ_0014222	chr1	153362507	153363033	-	526	375	NM_002964	S100A8
hsa_circ_0033489	3.58035	P	4.80512	P	0.427866	2.33718	down	circRNA	AGCATTAAACTCCTGTATGTCCTTCAAATCAGCGGGCGCGGAGCCGGAAGTGTTGTGGCC	NA	circbase	NA	NA	NA	NA	NA	NA	NA	NA	NA	NA	NA	hsa_circ_0033489	chr14	103995508	104003410	+	7902	3241	NM_152307	TRMT61A
hsa_circ_0071523	2.63919	A	6.64805	P	0.0621174	16.0985	down	circRNA	GAGTGCCGAGGAAAGAAACCAAAGACAGAAAAAGAAGACAAAGTTAAGCACATCAAGCAA	NA	circbase	NA	NA	NA	NA	NA	NA	NA	NA	NA	NA	NA	hsa_circ_0071523	chr4	185311856	185339367	-	27511	377	NM_002199	IRF2
hsa_circ_0058750	3.86425	P	2.51064	A	2.55552	2.55552	up	circRNA	TTTGTGAAGAGGGATGAAGTACAACTTGCCTTCCTGGTGTGACCGAGTCCTCTGGAAGTC	NA	circbase	NA	NA	NA	NA	NA	NA	NA	NA	NA	NA	NA	hsa_circ_0058750	chr2	234091055	234104141	+	13086	622	NM_001017915	INPP5D
hsa_circ_0036442	4.01033	P	11.4153	M	0.00590022	169.485	down	circRNA	TTTGTGAACTCCTGGTAGTAAAACACTTTTGCATCCCCACTTTCCACATCCGGATCTGAG	NA	circbase	NA	NA	NA	NA	NA	NA	NA	NA	NA	NA	NA	hsa_circ_0036442	chr15	78396990	78397674	-	684	684	NM_006383	CIB2
hsa_circ_0005017	3.00437	A	4.06907	P	0.478072	2.09173	down	circRNA	AACTCCCCAGGCCTCAGAAGTTTCTAGAAACAGAGGAGCCTCTTTACTGGCCAGGCCAGG	NA	circbase	NA	NA	NA	NA	NA	NA	NA	NA	NA	NA	NA	hsa_circ_0005017	chr7	43531673	43540921	+	9248	397	NM_015052	HECW1
hsa_circ_0016062	1.13972	A	5.50199	P	0.0486214	20.5671	down	circRNA	CTGGGCTCAGTTCTGCTAACAGACTCCGAATTCAGTATGCAGGAGCCTATGGTGCCTGCC	NA	circbase	NA	NA	NA	NA	NA	NA	NA	NA	NA	NA	NA	hsa_circ_0016062	chr1	203028305	203030806	+	2501	467	NM_015053	PPFIA4
hsa_circ_0062615	2.64817	A	3.95971	P	0.402891	2.48206	down	circRNA	ATTCTCAATAAACATTATTCTCACTGCAAAACCTTTCCCCAGTGTTGAGCGCGGTCTCGC	NA	circbase	NA	NA	NA	NA	NA	NA	NA	NA	NA	NA	NA	hsa_circ_0062615	chr22	24936405	24951903	-	15498	4235	NM_031444	C22orf13
hsa_circ_0015339	5.5125	P	4.2596	P	2.38321	2.38321	up	circRNA	AACATTTGTTCTGAAGTCCAGTGGGTGTGTACACTGGCACTGAGCTGCAGTAGGATTTTT	NA	circbase	NA	NA	NA	NA	NA	NA	NA	NA	NA	NA	NA	hsa_circ_0015339	chr1	174846529	174964445	+	117916	37725	NM_001035230	RABGAP1L
hsa_circ_0070727	3.47997	P	2.32129	A	2.23253	2.23253	up	circRNA	AGAAAACAGCATCCAACTGTTACATAACAGGATGGGGTGACACAGGATCAGTACGACTTC	NA	circbase	NA	NA	NA	NA	NA	NA	NA	NA	NA	NA	NA	hsa_circ_0070727	chr4	119203985	119259469	-	55484	1818	NM_003619	PRSS12
hsa_circ_0016686	7.97883	P	6.25021	P	3.31409	3.31409	up	circRNA	ATCTTCCGTCTGCAGGAAGACAGGCGCGATGATGGACTCCCCGTTCCTGGAGCTGTGGCA	NA	circbase	NA	NA	NA	NA	NA	NA	NA	NA	NA	NA	NA	hsa_circ_0016686	chr1	226058775	226065294	-	6519	385	NM_014698	TMEM63A
hsa_circ_0022185	3.60598	P	4.61191	P	0.497948	2.00824	down	circRNA	GGTGCAGAAGATGCCTTATTGGAGGAACTGGAACGCTCCACCCTTCAGGACAGTGATGAA	NA	circbase	NA	NA	NA	NA	NA	NA	NA	NA	NA	NA	NA	hsa_circ_0022185	chr11	58317258	58338186	-	20928	729	NM_004811	LPXN
hsa_circ_0012702	5.06541	P	1.42704	A	12.4525	12.4525	up	circRNA	GCTGCTCGAGTTGCAATACAATATTTAGAGGCACATCTAAAATTTCTAGCGTTTTTCTTG	NA	circbase	NA	NA	NA	NA	NA	NA	NA	NA	NA	NA	NA	hsa_circ_0012702	chr1	55590992	55612733	-	21741	1842	NM_015306	USP24
hsa_circ_0004892	1.20698	A	4.14423	P	0.130557	7.6595	down	circRNA	ATCATTGATTGAGAGGACCATTTTCTGACTGTCTGCACACGGTGATTGCTGAGTTCTGGA	NA	circbase	NA	NA	NA	NA	NA	NA	NA	NA	NA	NA	NA	hsa_circ_0004892	chr4	155122899	155128205	+	5306	5306	---	---
hsa_circ_0018769	4.08371	P	5.27671	P	0.437392	2.28628	down	circRNA	CAGAGGAATTACAGGTGTGTGATCCTGTAAAATTAAATCTTCCAAGATGATCTGGTATAT	NA	circbase	NA	NA	NA	NA	NA	NA	NA	NA	NA	NA	NA	hsa_circ_0018769	chr10	74790028	74834673	-	44645	1280	NM_001142596	P4HA1
hsa_circ_0025812	2.14955	A	3.67516	P	0.347333	2.87908	down	circRNA	GAATCACCAGAAATATATGCAAGAGGCACGAAGTTTAGGAAAAAACCTGAGGCAACCCAA	NA	circbase	NA	NA	NA	NA	NA	NA	NA	NA	NA	NA	NA	hsa_circ_0025812	chr12	31576530	31579358	-	2828	364	NM_144973	DENND5B
hsa_circ_0013013	8.90966	P	7.7071	P	2.30148	2.30148	up	circRNA	ACCATTGAAAGTAGTAGATGATGACTCCCCAGAGATGTATAAGACAATCTCTCAAGAATT	NA	circbase	NA	NA	NA	NA	NA	NA	NA	NA	NA	NA	NA	hsa_circ_0013013	chr1	78398966	78408503	+	9537	964	NM_144573	NEXN
hsa_circ_0038622	8.174	P	12.591	P	0.0468119	21.3621	down	circRNA	TTATACATTCGGGCTTCTCTTTATTGTCCTGAGTCATCCCTGTGCCAAAGAGAGTGAGTC	NA	circbase	NA	NA	NA	NA	NA	NA	NA	NA	NA	NA	NA	hsa_circ_0038622	chr16	23614482	23619333	-	4851	657	NM_024675	PALB2
hsa_circ_0080107	2.82681	A	3.87547	P	0.483418	2.06861	down	circRNA	TGTCCCTTCAATTGAGGACCTGTCCCAGCAAGTGCACAAAGCCGCAGCTGAGAAGTTTAA	NA	circbase	NA	NA	NA	NA	NA	NA	NA	NA	NA	NA	NA	hsa_circ_0080107	chr7	45120035	45120621	-	586	357	NM_001146334	NACAD
hsa_circ_0077820	4.74471	P	3.09487	A	3.13799	3.13799	up	circRNA	AAATACAAAAAAAGAACTTGTTTGCATCCCTGCTAGACAAAAACCTACAAGTTAACCTTT	NA	circbase	NA	NA	NA	NA	NA	NA	NA	NA	NA	NA	NA	hsa_circ_0077820	chr6	129802646	129845209	-	42563	42563	TCONS_l2_00024911	TCONS_l2_00024911
hsa_circ_0077308	4.46256	P	7.79756	P	0.0990974	10.0911	down	circRNA	GTTTCTGGAGAGTTTTAAGAGGAAACCTGGGCAGGCTGACAATGAACGTTCCATGGGTGA	NA	circbase	NA	NA	NA	NA	NA	NA	NA	NA	NA	NA	NA	hsa_circ_0077308	chr6	90353230	90365687	-	12457	1999	NM_014611	MDN1
hsa_circ_0049116	4.18146	P	2.751	A	2.69533	2.69533	up	circRNA	ACTGACCTTGCTCAGGCCCGAGAAAGATGGGGCAGCCACTGGAGTGGATGCCATCTGCAC	NA	circbase	NA	NA	NA	NA	NA	NA	NA	NA	NA	NA	NA	hsa_circ_0049116	chr19	9000146	9024998	-	24852	3747	NM_024690	MUC16
hsa_circ_0069394	4.45397	P	3.21768	A	2.35592	2.35592	up	circRNA	AATATTTGAGGGTTCAGAAATGCTCAGAAATCAATCACATGAATGCCCATAATTTGGCCT	NA	circbase	NA	NA	NA	NA	NA	NA	NA	NA	NA	NA	NA	hsa_circ_0069394	chr4	36122800	36122948	-	148	148	NM_015230	ARAP2
hsa_circ_0040361	4.85483	P	3.77192	P	2.1183	2.1183	up	circRNA	TGGTGGAAAGAAAAACCATGCCACATGGATCGTTTGGATCGAATCCTATTGTCTGGCATC	NA	circbase	NA	NA	NA	NA	NA	NA	NA	NA	NA	NA	NA	hsa_circ_0040361	chr16	71724421	71724612	-	191	191	NM_015020	PHLPP2
hsa_circ_0026747	3.08607	A	4.31189	P	0.427554	2.33888	down	circRNA	CAAAAAGAGCGTCAGAAATGCCCGGAGGCTGAGTGTTTCAGGCTGCGCTGTGAGCTCGGG	NA	circbase	NA	NA	NA	NA	NA	NA	NA	NA	NA	NA	NA	hsa_circ_0026747	chr12	54792380	54793542	-	1162	216	NM_002205	ITGA5
hsa_circ_0025689	6.84294	P	4.76562	P	4.22023	4.22023	up	circRNA	CATGCAAGCGAATTACACTATTGTACTGGAGCTTATCGGATTTCACCTGTAGATGTAAAT	NA	circbase	NA	NA	NA	NA	NA	NA	NA	NA	NA	NA	NA	hsa_circ_0025689	chr12	27067340	27070374	-	3034	440	NM_018164	C12orf11
hsa_circ_0070687	3.72136	P	1.54232	A	4.52851	4.52851	up	circRNA	CTTCTTGCAGTGAGGAAACCATTTATTACAGTAGTTTCACCAAAGTCTCCTCATCTGCAC	NA	circbase	NA	NA	NA	NA	NA	NA	NA	NA	NA	NA	NA	hsa_circ_0070687	chr4	113524679	113533744	-	9065	374	NM_018392	C4orf21
hsa_circ_0067557	7.92534	P	9.02189	P	0.467634	2.13843	down	circRNA	TGTTCAAAACGTCGAGATGAGAGTGGAAGGTGTGGTCTGCAAGCAAGTATTCAAGAAGGT	NA	circbase	NA	NA	NA	NA	NA	NA	NA	NA	NA	NA	NA	hsa_circ_0067557	chr3	139236275	139236522	-	247	247	NM_002899	RBP1
hsa_circ_0059498	3.40884	P	1.22856	A	4.5324	4.5324	up	circRNA	TAAAATAATCGTGCTACTAATGCCATCTTGGACTCGGGCTGAGTAATAAATTCCCCCCGC	NA	circbase	NA	NA	NA	NA	NA	NA	NA	NA	NA	NA	NA	hsa_circ_0059498	chr20	17922243	17949490	-	27247	2152	NM_152227	SNX5
hsa_circ_0024681	3.59386	P	5.18312	P	0.332342	3.00894	down	circRNA	AACTTATTGGTCAACACTCTATACACCGTCAGAGTAGCTAATCCAGATGGCGACTTCCGA	NA	circbase	NA	NA	NA	NA	NA	NA	NA	NA	NA	NA	NA	hsa_circ_0024681	chr11	121428022	121477999	+	49977	2595	NM_003105	SORL1
hsa_circ_0079809	2.45006	A	3.81536	P	0.388152	2.57631	down	circRNA	CTACAAGCAGGTGGATTGGACTCTAAATATTGGAGAGCAAGCCCTTGACATATGTATTGT	NA	circbase	NA	NA	NA	NA	NA	NA	NA	NA	NA	NA	NA	hsa_circ_0079809	chr7	33312623	33427756	+	115133	1413	NM_198428	BBS9
hsa_circ_0010944	3.43774	P	1.92991	A	2.84383	2.84383	up	circRNA	CAAATAATAAATGTTCTCGTTTTGAAACTCAAAGAAAGAGAAGAGGGACAAAGCCAGCCA	NA	circbase	NA	NA	NA	NA	NA	NA	NA	NA	NA	NA	NA	hsa_circ_0010944	chr1	25889560	25895377	+	5817	2289	NM_015627	LDLRAP1
hsa_circ_0013332	3.87024	P	2.54125	A	2.51226	2.51226	up	circRNA	TCTTTCCTGAACTGGAAACCAATGGTGTTGCCACATCTGCAAACTTCCTGGGAGAGTAAT	NA	circbase	NA	NA	NA	NA	NA	NA	NA	NA	NA	NA	NA	hsa_circ_0013332	chr1	101343031	101343459	-	428	428	NM_001439	EXTL2
hsa_circ_0019058	3.4611	P	2.1745	A	2.43952	2.43952	up	circRNA	GAACAATATTGATGATGTAGTAAGGTATTTATCCAAACATTATTGCTATGGGATTTCCTG	NA	circbase	NA	NA	NA	NA	NA	NA	NA	NA	NA	NA	NA	hsa_circ_0019058	chr10	89653781	89653866	+	85	85	NM_000314	PTEN
hsa_circ_0037196	3.68016	P	1.94328	A	3.33312	3.33312	up	circRNA	CTTCTCACAGGCAGCAGCCCAGACGCGGCACAGAGAGGGCCTGGGAGCTTGCTGCAGCTT	NA	circbase	NA	NA	NA	NA	NA	NA	NA	NA	NA	NA	NA	hsa_circ_0037196	chr16	583945	599471	+	15526	2031	NM_005632	SOLH
hsa_circ_0016220	2.61023	A	3.77489	P	0.446072	2.24179	down	circRNA	TCATTGCCATGGCCATCAGCAGGCCAACATTGGACACATGGACACACCCAAGGAGCTCTG	NA	circbase	NA	NA	NA	NA	NA	NA	NA	NA	NA	NA	NA	hsa_circ_0016220	chr1	205767031	205768958	-	1927	512	NM_173854	SLC41A1
hsa_circ_0085877	4.43333	P	5.8652	P	0.370649	2.69797	down	circRNA	TGGTGGGAAAGGCTCCACACCCTACAGGGCTGGTGATGCGGTGAATGGTGTGGCTCTGCA	NA	circbase	NA	NA	NA	NA	NA	NA	NA	NA	NA	NA	NA	hsa_circ_0085877	chr8	144887281	144887605	-	324	324	NM_182706	SCRIB
hsa_circ_0026004	5.54418	P	1.79972	A	13.4028	13.4028	up	circRNA	CGATTTGCTTTGCAAAAATTAGAAGAGGCCAAAAAAGGGCAATAAATACTTCAAACAAGG	NA	circbase	NA	NA	NA	NA	NA	NA	NA	NA	NA	NA	NA	hsa_circ_0026004	chr12	48084300	48090186	-	5886	250	NM_024604	RPAP3
hsa_circ_0007107	3.8387	P	2.25941	A	2.98824	2.98824	up	circRNA	GTAAAGCCTTACTGCCCTTGAAGTATGCAGAGCATTTTTACAGGAAGATAAAGGCGAAGG	NA	circbase	NA	NA	NA	NA	NA	NA	NA	NA	NA	NA	NA	hsa_circ_0007107	chr4	25351113	25366127	+	15014	502	NM_024936	ZCCHC4
hsa_circ_0047859	4.6683	P	2.81245	A	3.61965	3.61965	up	circRNA	ACAGTTCAAGAAACAGTATTATGTCTCAGTCCTGTGCAAAGTGAGATGAGCTGTAGCCTT	NA	circbase	NA	NA	NA	NA	NA	NA	NA	NA	NA	NA	NA	hsa_circ_0047859	chr18	59806215	59830889	-	24674	1351	NM_176787	PIGN
hsa_circ_0088590	1.10877	A	4.70687	P	0.0825779	12.1098	down	circRNA	TGAGAGCAAAGAAAAGAAGATCAGGGAATTCATTCAAGCTCCTATACCATTTAGAAAGAA	NA	circbase	NA	NA	NA	NA	NA	NA	NA	NA	NA	NA	NA	hsa_circ_0088590	chr9	128104497	128117120	+	12623	792	NM_015635	GAPVD1
hsa_circ_0045793	4.14706	P	3.09748	A	2.06993	2.06993	up	circRNA	TTTACTTGCAGTCTGATCCTGGTAAATGAACCATACTACAACGAAGCCGGCTTCGACAGT	NA	circbase	NA	NA	NA	NA	NA	NA	NA	NA	NA	NA	NA	hsa_circ_0045793	chr17	74385612	74387694	-	2082	2082	NM_022066	UBE2O
hsa_circ_0027930	5.90764	P	6.94372	P	0.487652	2.05064	down	circRNA	ATCAAGGACGGATGATGAAGTAGTACAGAGGTGGGCGGACCGCGCGGCTGGAGGTGTGAG	NA	circbase	NA	NA	NA	NA	NA	NA	NA	NA	NA	NA	NA	hsa_circ_0027930	chr12	104324188	104325401	+	1213	257	NM_003299	HSP90B1
hsa_circ_0002434	4.67729	P	3.58029	A	2.1391	2.1391	up	circRNA	TACCCTCTCGATACCGAGTGGCAATCTGGGTATGTTTGGCAATAGTGGAGCAGCACAAGC	NA	circbase	NA	NA	NA	NA	NA	NA	NA	NA	NA	NA	NA	hsa_circ_0002434	chr17	76075475	76083174	+	7699	592	NM_001142640	TNRC6C
hsa_circ_0029473	3.9211	P	1.11535	A	6.99221	6.99221	up	circRNA	AGCATCTAAGAGGCAGTGAACACTGGCGCCCACAGGTAAAGGTTGTGGCCAGAAAGCACG	NA	circbase	NA	NA	NA	NA	NA	NA	NA	NA	NA	NA	NA	hsa_circ_0029473	chr12	132593116	132599090	+	5974	199	NR_003290	EP400NL
hsa_circ_0066070	3.88501	P	5.08586	P	0.435019	2.29875	down	circRNA	CGAGAGGGAGCACCATGGGTTGGTGCCCCAGATTGAGGCTGCCACTGCCTACACCATCTT	NA	circbase	NA	NA	NA	NA	NA	NA	NA	NA	NA	NA	NA	hsa_circ_0066070	chr3	52548130	52552885	+	4755	1587	NM_015136	STAB1
hsa_circ_0034434	3.88303	P	7.72743	P	0.0696178	14.3642	down	circRNA	ACTTACCACTGCAAAAAGAGTCTGGCGGAGACAACAGCGTGTTTGACATCTTTGAACTCA	NA	circbase	NA	NA	NA	NA	NA	NA	NA	NA	NA	NA	NA	hsa_circ_0034434	chr15	39874393	39882224	+	7831	2078	NM_003246	THBS1
hsa_circ_0080914	5.05546	P	1.2484	A	13.9971	13.9971	up	circRNA	ATTTCTCGTTTTGAATGCATGACCTGCAATGGGGAGAGTTATCGAGGTCTCATGGATCAT	NA	circbase	NA	NA	NA	NA	NA	NA	NA	NA	NA	NA	NA	hsa_circ_0080914	chr7	81346547	81374436	-	27889	780	NM_000601	HGF
hsa_circ_0010967	2.59753	A	3.98395	P	0.382513	2.61429	down	circRNA	AGGAACTGGACAAAGAGAACTGACGTAGCTGATCGGCCCGGAAGTGCTCACACGTGTGCT	NA	circbase	NA	NA	NA	NA	NA	NA	NA	NA	NA	NA	NA	hsa_circ_0010967	chr1	26496387	26497364	+	977	649	NM_015871	ZNF593
hsa_circ_0076174	8.21982	P	11.7994	M	0.083644	11.9554	down	circRNA	GACAACAAAGGTGTTACAGGGTCTTGATTATTTACATACCAAGTGCCGTATCATCCACAC	NA	circbase	NA	NA	NA	NA	NA	NA	NA	NA	NA	NA	NA	hsa_circ_0076174	chr6	35837258	35840505	-	3247	826	NR_034069	SRPK1
hsa_circ_0072737	6.08607	P	8.8193	P	0.150389	6.6494	down	circRNA	CCCCCAGGAGTGATGCAGCCAACACGAACGGTTGTCATGTGTAACACAACTTTCGATCAC	NA	circbase	NA	NA	NA	NA	NA	NA	NA	NA	NA	NA	NA	hsa_circ_0072737	chr5	65454636	65470869	+	16233	1409	NM_139168	SREK1
hsa_circ_0087599	3.67492	P	12.5038	M	0.00219901	454.75	down	circRNA	TAAACGAGGCCATTTTGCTGGTGTATTATCTCATATACTTTCAGCACTCAGATTTGATAA	NA	circbase	NA	NA	NA	NA	NA	NA	NA	NA	NA	NA	NA	hsa_circ_0087599	chr9	97912204	97934429	-	22225	341	NM_000136	FANCC
hsa_circ_0001326	5.23459	P	6.42057	P	0.439525	2.27519	down	circRNA	TGAACTGGAAAAGAACATTGTTGGTGAAAAGACCAAGGAGAGACAGCGTCTGGAGACCAT	NA	circbase	NA	NA	NA	NA	NA	NA	NA	NA	NA	NA	NA	hsa_circ_0001326	chr3	111632165	111639266	+	7101	666	NM_001134439	PHLDB2
hsa_circ_0042955	4.49537	P	5.69771	P	0.434568	2.30113	down	circRNA	AGTGAAGACTCTGCCAACAGGGCTTCTTTGCCTTGTCTTCCTCTTTTCTCCATGTTCTTT	NA	circbase	NA	NA	NA	NA	NA	NA	NA	NA	NA	NA	NA	hsa_circ_0042955	chr17	30207591	30215240	-	7649	1332	NM_018428	UTP6
hsa_circ_0057987	3.27511	P	4.27716	P	0.49929	2.00284	down	circRNA	CATCAAAAAAAATCCTTATTTAATCGCCGAGTAGAGGAAAAATCCAAAGAGCTGCCTTTC	NA	circbase	NA	NA	NA	NA	NA	NA	NA	NA	NA	NA	NA	hsa_circ_0057987	chr2	209179017	209180097	+	1080	311	NM_015040	PIKFYVE
hsa_circ_0044591	3.34222	P	1.68114	A	3.16254	3.16254	up	circRNA	GGCTGGAGCTTCCCTAGATGACACTGAGCTCCGGCTGTTGGGACGGACGCACTCGGCCTG	NA	circbase	NA	NA	NA	NA	NA	NA	NA	NA	NA	NA	NA	hsa_circ_0044591	chr17	48559451	48560848	+	1397	578	NM_018346	RSAD1
hsa_circ_0003628	3.3653	P	5.67496	P	0.201707	4.95769	down	circRNA	ACTTCCCCTCACCAGAAGGACGGCAGAAGAGAATGAGAGCAAGCAGGGGAAATGCCAGAT	NA	circbase	NA	NA	NA	NA	NA	NA	NA	NA	NA	NA	NA	hsa_circ_0003628	chr12	120109299	120110269	+	970	970	NM_006253	PRKAB1
hsa_circ_0020763	3.77561	P	2.75985	A	2.02197	2.02197	up	circRNA	ATCCTCCTGCCTGCAGGAGCTTTGCACCTGGACCGAGTGGATTGAGGGTCTACCCCTGCA	NA	circbase	NA	NA	NA	NA	NA	NA	NA	NA	NA	NA	NA	hsa_circ_0020763	chr11	1217101	1222366	+	5265	5265	---	---
hsa_circ_0031594	5.10936	P	6.60382	P	0.354914	2.81759	down	circRNA	ACGCAACCAGGCAATGGTGGCTTGCTATCCGGGAAATGGAACAGGTTATGTTCGCCACGT	NA	circbase	NA	NA	NA	NA	NA	NA	NA	NA	NA	NA	NA	hsa_circ_0031594	chr14	34398281	34400421	-	2140	257	NM_022073	EGLN3
hsa_circ_0057707	1.39408	A	5.38732	P	0.0627934	15.9252	down	circRNA	CCCATAATTGATGCATGCAAGACTTTCTGTAAAGCATCACCCAGCCAATGCCTGTCTGAT	NA	circbase	NA	NA	NA	NA	NA	NA	NA	NA	NA	NA	NA	hsa_circ_0057707	chr2	201462119	201467068	+	4949	298	NM_001159	AOX1
hsa_circ_0090359	3.65585	P	4.68518	P	0.489939	2.04107	down	circRNA	ACTGACCCAGGTAACATTCGATCCAGAAGTATTTTTCAACATTCTTCTGCCTCCAATTAT	NA	circbase	NA	NA	NA	NA	NA	NA	NA	NA	NA	NA	NA	hsa_circ_0090359	chrX	46529041	46539190	-	10149	268	NM_032591	SLC9A7
hsa_circ_0002861	6.2078	P	5.03018	P	2.26203	2.26203	up	circRNA	CTGCTGCATAATCATCACGGGGGAATTCTACCGGATCTATTACCTGAAGAAGTCGCGGTC	NA	circbase	NA	NA	NA	NA	NA	NA	NA	NA	NA	NA	NA	hsa_circ_0002861	chr1	56977647	56990226	-	12579	513	NM_003713	PPAP2B
hsa_circ_0070495	5.90152	P	4.84795	P	2.07566	2.07566	up	circRNA	TGTTCAGACCACATATGAGTGCCTGATGCAAGCCATTGATGCAGAAGATGAAAAGGCGAA	NA	circbase	NA	NA	NA	NA	NA	NA	NA	NA	NA	NA	NA	hsa_circ_0070495	chr4	99955380	99966461	+	11081	621	NM_015143	METAP1
hsa_circ_0085583	1.98269	A	6.70464	P	0.0378924	26.3905	down	circRNA	GGATGACAAAATATCCAGGAATGATTTTCAGAGTATTTGAGAAAATGAGAGGTGCAGATG	NA	circbase	NA	NA	NA	NA	NA	NA	NA	NA	NA	NA	NA	hsa_circ_0085583	chr8	131127873	131374017	-	246144	2215	NM_001247996	ASAP1
hsa_circ_0024014	3.75987	P	1.95207	A	3.50107	3.50107	up	circRNA	GATGAAGCAGGTTGGCATTGCTCCAGCATCATGCCCTGTAATTTCTGATGAAGATAGTCA	NA	circbase	NA	NA	NA	NA	NA	NA	NA	NA	NA	NA	NA	hsa_circ_0024014	chr11	93429485	93440063	+	10578	4078	NM_033395	KIAA1731
hsa_circ_0085219	4.52756	P	6.0413	P	0.350202	2.8555	down	circRNA	ACACCAGCAGAAGCGGAGCGTTCTGAAAGAAATACATTTGCAGAAAGGCTTTCTGCTGTT	NA	circbase	NA	NA	NA	NA	NA	NA	NA	NA	NA	NA	NA	hsa_circ_0085219	chr8	103298587	103316397	-	17810	2388	NM_015902	UBR5
hsa_circ_0066441	2.52081	A	3.79449	P	0.413603	2.41778	down	circRNA	GTGCCCACAGTGCTCAGTGACCTGTGGAAAAGGCTACAAACAAAGGCTTGTCTCGTGCAG	NA	circbase	NA	NA	NA	NA	NA	NA	NA	NA	NA	NA	NA	hsa_circ_0066441	chr3	64524878	64532628	-	7750	744	NM_182920	ADAMTS9
hsa_circ_0059837	2.9405	A	4.05982	P	0.460311	2.17244	down	circRNA	TTGAGCTGCAACTTTCAGCCTCAACCCCGTGGGTCCTGAGTCCCAGATCCGCTATTCCAT	NA	circbase	NA	NA	NA	NA	NA	NA	NA	NA	NA	NA	NA	hsa_circ_0059837	chr20	31606064	31611515	+	5451	1126	NM_025227	BPIFB2
hsa_circ_0062424	10.2978	P	11.9848	P	0.310574	3.21984	down	circRNA	AAGTGCCTTTGTGATTAAAGAATGTTGGTCTATGAGAGGTGAGTGCCTTTGGGGAAGACG	NA	circbase	NA	NA	NA	NA	NA	NA	NA	NA	NA	NA	NA	hsa_circ_0062424	chr22	21998182	21998588	+	406	406	NM_022044	SDF2L1
hsa_circ_0046711	8.46518	P	7.46413	P	2.00145	2.00145	up	circRNA	AAATGGACAGATGAAACTGTTAAAGATGGAGTCACCTTATACCTGCTACAGTCGGTCAAT	NA	circbase	NA	NA	NA	NA	NA	NA	NA	NA	NA	NA	NA	hsa_circ_0046711	chr18	2666868	2700916	+	34048	1385	NM_015295	SMCHD1
hsa_circ_0065981	5.08938	P	7.40519	P	0.200849	4.97886	down	circRNA	ATATCAACTGGGTCCGCTGTGCCAAGAGGACCCCTCGCTGGAAAGGCATTTTAAGGGCCA	NA	circbase	NA	NA	NA	NA	NA	NA	NA	NA	NA	NA	NA	hsa_circ_0065981	chr3	52183225	52185116	-	1891	437	NM_015426	POC1A
hsa_circ_0083435	3.705	P	2.6865	A	2.02581	2.02581	up	circRNA	AAGTAGCCTTCATGTCTTCTGGGCTCTATGTTTCCTTTACCCCGAATTCTGTTTGCCATG	NA	circbase	NA	NA	NA	NA	NA	NA	NA	NA	NA	NA	NA	hsa_circ_0083435	chr8	17412454	17419619	+	7165	613	NM_003046	SLC7A2
hsa_circ_0089656	7.56889	P	6.19047	P	2.59983	2.59983	up	circRNA	CCGGGAACAGGTGAATCTGATTAACGAGCCCCTGGTGATATTTGTTTGTGCAACTACAGG	NA	circbase	NA	NA	NA	NA	NA	NA	NA	NA	NA	NA	NA	hsa_circ_0089656	chr9	140100683	140110469	+	9786	1419	NM_001144026	NDOR1
hsa_circ_0069562	3.45484	P	1.28345	A	4.50456	4.50456	up	circRNA	ACAATGGCCGCAGATATATGGAGTGATCACTCATTTCAGACTGATCCAGATTTGCCGCCT	NA	circbase	NA	NA	NA	NA	NA	NA	NA	NA	NA	NA	NA	hsa_circ_0069562	chr4	40892380	40947090	-	54710	694	NM_004307	APBB2
hsa_circ_0076820	3.59087	P	2.02583	A	2.95885	2.95885	up	circRNA	TCAGCATAAAGTATTCCAGAAAGAAGAGATTGAACCCTTGCAAGGTAAACAGCAAGATGT	NA	circbase	NA	NA	NA	NA	NA	NA	NA	NA	NA	NA	NA	hsa_circ_0076820	chr6	56346847	56401738	-	54891	4923	NM_015548	DST
hsa_circ_0046714	7.48943	P	6.31631	P	2.25499	2.25499	up	circRNA	TCAAGGCAAGCATTTGCTCTTGCGGAATTAATTGACAATTCATTGTCTGCTACTTCTCGT	NA	circbase	NA	NA	NA	NA	NA	NA	NA	NA	NA	NA	NA	hsa_circ_0046714	chr18	2673279	2724993	+	51714	2276	NM_015295	SMCHD1
hsa_circ_0063008	3.64116	P	2.06029	A	2.99151	2.99151	up	circRNA	AAGTTCAAAGACAATCCACGTTGCTATTGTCTGCGCCGGATACAATGCCAGCCGGGATGT	NA	circbase	NA	NA	NA	NA	NA	NA	NA	NA	NA	NA	NA	hsa_circ_0063008	chr22	33960833	34022310	-	61477	379	NM_004737	LARGE
hsa_circ_0056905	3.70088	P	1.73856	A	3.89687	3.89687	up	circRNA	CTTGCTGGCATACACTTGGGGATACAAACTGGCATTTAATTACTTAAAAGCAAAAAGATA	NA	circbase	NA	NA	NA	NA	NA	NA	NA	NA	NA	NA	NA	hsa_circ_0056905	chr2	166714724	166732742	-	18018	5747	NR_045375	LOC100506124
hsa_circ_0089889	6.19161	P	3.54155	P	6.27695	6.27695	up	circRNA	ATTTCAATAAAATCATTCTGACTGCGTTCATAGTTGCTGCTGTCAGCTGGAGCCACCAAA	NA	circbase	NA	NA	NA	NA	NA	NA	NA	NA	NA	NA	NA	hsa_circ_0089889	chrX	12838762	12842346	+	3584	1684	NM_001039091	PRPS2
hsa_circ_0071106	3.2234	A	4.33364	P	0.463216	2.15882	down	circRNA	CTGCTGATCGGAAGAAAAAAAGAAGTTTGACAAAGAGACAGAAAAGAATTATAGTCTAAT	NA	circbase	NA	NA	NA	NA	NA	NA	NA	NA	NA	NA	NA	hsa_circ_0071106	chr4	148778703	148803083	+	24380	650	NM_024605	ARHGAP10
hsa_circ_0026157	3.81675	P	5.08998	P	0.413734	2.41701	down	circRNA	TTTTTCTTTTGTAAATAAAAAGCACCAGGTTCCAAGGACATGCGAGATGAGGTCCTGGAA	NA	circbase	NA	NA	NA	NA	NA	NA	NA	NA	NA	NA	NA	hsa_circ_0026157	chr12	49952085	49953750	-	1665	848	NM_006337	MCRS1
hsa_circ_0058145	3.88344	P	2.38588	A	2.82366	2.82366	up	circRNA	TGTAGACTGAATAGATGCAACGATCAGGACACAAGGACATCCTATAGAATTGGAGACACC	NA	circbase	NA	NA	NA	NA	NA	NA	NA	NA	NA	NA	NA	hsa_circ_0058145	chr2	216279383	216293061	-	13678	1432	NM_054034	FN1
hsa_circ_0042869	4.50137	P	12.4055	M	0.00417454	239.548	down	circRNA	TCCTTCCCTGGAAAAATGAAAGTCGCTCCTTTATTTCTTGTCAGAAAAGCACAAAAAGCA	NA	circbase	NA	NA	NA	NA	NA	NA	NA	NA	NA	NA	NA	hsa_circ_0042869	chr17	29171852	29206505	+	34653	1709	NM_024857	ATAD5
hsa_circ_0015438	6.87996	P	5.74812	P	2.19139	2.19139	up	circRNA	ATTCGAGCAGGGATTTGAGAGCACCTCCAGAACAAGGAAAGATTTTTATTGCAAGGCGCT	NA	circbase	NA	NA	NA	NA	NA	NA	NA	NA	NA	NA	NA	hsa_circ_0015438	chr1	179306971	179310445	+	3474	451	NM_003101	SOAT1
hsa_circ_0091081	5.01167	P	2.57627	A	5.40914	5.40914	up	circRNA	ATCTAAAAATTTGCTCCCTAAGCCTGCGCTACTTCACCTACGGGATTCTCTTTGGTTGTG	NA	circbase	NA	NA	NA	NA	NA	NA	NA	NA	NA	NA	NA	hsa_circ_0091081	chrX	73744193	73753752	+	9559	3409	NM_006517	SLC16A2
hsa_circ_0072553	5.81363	P	1.4061	A	21.2226	21.2226	up	circRNA	AAGAGTATGAAAACGCAGAAGCCTTGAAGACAGTACCATGGGAAGTGTTGCAGACACAGT	NA	circbase	NA	NA	NA	NA	NA	NA	NA	NA	NA	NA	NA	hsa_circ_0072553	chr5	57749809	57751606	-	1797	1274	NM_006622	PLK2
hsa_circ_0023871	3.68811	P	2.5521	A	2.19772	2.19772	up	circRNA	GGACACAATTCCTTATATACTGACCGAGCTTTATCATTACTGGAAGAATACTGCAAAAAA	NA	circbase	NA	NA	NA	NA	NA	NA	NA	NA	NA	NA	NA	hsa_circ_0023871	chr11	83962280	85309832	-	1347552	665	NM_001142699	DLG2
hsa_circ_0007816	5.34789	P	6.80614	P	0.363935	2.74775	down	circRNA	TGTTGGATCAACTTGGAGATTTAGAGTTCAGGGCGAAATGACCCTGAATGTGACCTGTGT	NA	circbase	NA	NA	NA	NA	NA	NA	NA	NA	NA	NA	NA	hsa_circ_0007816	chr9	6477621	6482099	+	4478	419	NM_152896	UHRF2
hsa_circ_0076833	4.64888	P	3.26299	A	2.61333	2.61333	up	circRNA	AGAGCTAAAGGAATTACAGAAAGATATGCAAGGAAGTGCACAGGCATTGGCTGAAGTAGT	NA	circbase	NA	NA	NA	NA	NA	NA	NA	NA	NA	NA	NA	hsa_circ_0076833	chr6	56368794	56463507	-	94713	7872	NM_015548	DST
hsa_circ_0030136	3.91413	P	7.18286	P	0.103756	9.638	down	circRNA	AACTTTTGGGGTGGAACTAAAGAGGATGATGTTTAAGAGCAGGACTGGCTGCCTCAATTG	NA	circbase	NA	NA	NA	NA	NA	NA	NA	NA	NA	NA	NA	hsa_circ_0030136	chr13	42772613	42780282	+	7669	434	NM_178009	DGKH
hsa_circ_0017549	3.89482	P	2.05782	A	3.57266	3.57266	up	circRNA	CATTTTGAAATAAGTTTTTGAGTTCCAGTTGACTGCAGAGGACATGAAAGCCATAGATGG	NA	circbase	NA	NA	NA	NA	NA	NA	NA	NA	NA	NA	NA	hsa_circ_0017549	chr10	5147786	5149878	+	2092	309	NM_003739	AKR1C3
hsa_circ_0016724	4.427	P	2.59961	A	3.54893	3.54893	up	circRNA	CAATAAATAGATGAGTCCTGTTAGAATCTTGCATCTACACGCCATTCACTGAGGACACAC	NA	circbase	NA	NA	NA	NA	NA	NA	NA	NA	NA	NA	NA	hsa_circ_0016724	chr1	227073238	227083804	+	10566	1515	NM_000447	PSEN2
hsa_circ_0020345	3.59146	P	2.4646	A	2.18383	2.18383	up	circRNA	TAAAACCCAGGTGGACCATGGATTCACTAGGTAATGAGGAACAGCAAGAAAAACTGCTCA	NA	circbase	NA	NA	NA	NA	NA	NA	NA	NA	NA	NA	NA	hsa_circ_0020345	chr10	126673342	126676005	+	2663	2663	NM_017580	ZRANB1
hsa_circ_0010835	2.99459	A	4.0413	P	0.484071	2.06581	down	circRNA	GTTGGAAGCGAATCCCCCAAGATGGTAAATTTGAAAGAGAAAATTAAAGAACTCCATCAG	NA	circbase	NA	NA	NA	NA	NA	NA	NA	NA	NA	NA	NA	hsa_circ_0010835	chr1	23397717	23398690	+	973	209	NM_001009999	KDM1A
hsa_circ_0045512	1.08092	A	4.45562	P	0.0964086	10.3725	down	circRNA	GAAGGCTGAGTTTGCATCTGAATGAAAGGTGTGATCCAGAGAGTATAACATCACTGGTTA	NA	circbase	NA	NA	NA	NA	NA	NA	NA	NA	NA	NA	NA	hsa_circ_0045512	chr17	66980196	67020494	-	40298	2358	NM_080283	ABCA9
hsa_circ_0071126	2.57883	A	4.25525	P	0.312858	3.19634	down	circRNA	ATTATCTTTTGAAATAGGAGCAATTTTTGAGGATGCCCAGGCCAGACCCGATCGTCTATG	NA	circbase	NA	NA	NA	NA	NA	NA	NA	NA	NA	NA	NA	hsa_circ_0071126	chr4	148984298	148985658	+	1360	245	NM_024605	ARHGAP10
hsa_circ_0046731	6.48467	P	5.17068	P	2.48628	2.48628	up	circRNA	TAGTATCACGAGGGTAAGCCAGAGAAATTTTCATTTGGTCTTCTGGATCTTCCTTTTCGT	NA	circbase	NA	NA	NA	NA	NA	NA	NA	NA	NA	NA	NA	hsa_circ_0046731	chr18	2722516	2762234	+	39718	2108	NM_015295	SMCHD1
hsa_circ_0009579	5.72901	P	12.5403	M	0.00890424	112.306	down	circRNA	ACTGAACACAGCCAAACTTCCAGATCTGCAACCATTTCCTTCTCCAGATGGTGATACAGT	NA	circbase	NA	NA	NA	NA	NA	NA	NA	NA	NA	NA	NA	hsa_circ_0009579	chr1	8555122	8557589	-	2467	225	NM_012102	RERE
hsa_circ_0073115	3.64973	P	4.67587	P	0.491021	2.03657	down	circRNA	AGAAAAGCATCTTCAATGTCTGTGGGCTGTTGCAAGGAATTGCAGGTGAGTTGGGAATCA	NA	circbase	NA	NA	NA	NA	NA	NA	NA	NA	NA	NA	NA	hsa_circ_0073115	chr5	77805606	77928191	-	122585	779	NM_005779	LHFPL2
hsa_circ_0077974	2.93137	A	4.01153	P	0.472977	2.11427	down	circRNA	GTCCCTGGAGATGTGCACTGGGAACTACACCTTTGTTCCTTACATGATAACTCCACATAA	NA	circbase	NA	NA	NA	NA	NA	NA	NA	NA	NA	NA	NA	hsa_circ_0077974	chr6	136935296	137019820	-	84524	1666	NM_005923	MAP3K5
hsa_circ_0036234	5.30521	P	8.93241	P	0.0809286	12.3566	down	circRNA	TGCACAGGAGCTTTAACTGTGGAGAAAATTGGCATGATCCTGTTAAATGTAAGTGGTTAA	NA	circbase	NA	NA	NA	NA	NA	NA	NA	NA	NA	NA	NA	hsa_circ_0036234	chr15	72858903	72864506	+	5603	304	NM_005744	ARIH1
hsa_circ_0091208	3.55476	P	2.09058	A	2.75906	2.75906	up	circRNA	CTCATTGATATAAACAAAGAACATTCAAATAAAAACTTTGGCAGATGATGTGCGTGACCG	NA	circbase	NA	NA	NA	NA	NA	NA	NA	NA	NA	NA	NA	hsa_circ_0091208	chrX	95990756	96639043	+	648287	3013	NM_006729	DIAPH2
hsa_circ_0086004	2.01443	A	3.69158	P	0.3127	3.19795	down	circRNA	CACCCTGCAGCGCTTGGCGTGGGAACAGCAGGAGCCAGGCGAGAGGAAGCTGAGCTTTTT	NA	circbase	NA	NA	NA	NA	NA	NA	NA	NA	NA	NA	NA	hsa_circ_0086004	chr8	145317755	145319045	-	1290	1290	---	---
hsa_circ_0036526	2.80578	A	4.12527	P	0.400677	2.49578	down	circRNA	TACATTCTCTCGCTGCGTCACAGTCCATGGCTCCAATGGCTTGTTGGGAGCACACTGCCA	NA	circbase	NA	NA	NA	NA	NA	NA	NA	NA	NA	NA	NA	hsa_circ_0036526	chr15	81166204	81201647	+	35443	1813	NM_018689	KIAA1199
hsa_circ_0039354	5.39354	P	3.6899	P	3.25722	3.25722	up	circRNA	GGGGATCTGAAAACAGAGGAACAGGATTTTGACACTTCATGACATGTCATTATTTAGAGC	NA	circbase	NA	NA	NA	NA	NA	NA	NA	NA	NA	NA	NA	hsa_circ_0039354	chr16	53189837	53279391	+	89554	3362	NM_025134	CHD9
hsa_circ_0046839	5.59816	P	4.13425	P	2.75856	2.75856	up	circRNA	CTAGAGAAATAAAATATGGACTTCCAATCTACGTAAACTTAGAGGATTTGACAGCTAAGG	NA	circbase	NA	NA	NA	NA	NA	NA	NA	NA	NA	NA	NA	hsa_circ_0046839	chr18	9126828	9134343	+	7515	237	NM_021074	NDUFV2
hsa_circ_0069484	3.55951	P	4.80033	P	0.423133	2.36333	down	circRNA	TTACATAAATAAAACATTCTCCATCAACAACTAGTGCTGTCCAACCCTGAGTTTCTGGCA	NA	circbase	NA	NA	NA	NA	NA	NA	NA	NA	NA	NA	NA	hsa_circ_0069484	chr4	39500374	39512170	-	11796	2408	NM_001184700	UGDH
hsa_circ_0072302	3.86955	P	1.34373	A	5.759	5.759	up	circRNA	ATAGAATCTGGTGACCCACAACACAACTCTGAATGGCAAAGATACACTTCATCACTGGAG	NA	circbase	NA	NA	NA	NA	NA	NA	NA	NA	NA	NA	NA	hsa_circ_0072302	chr5	38493707	38512066	-	18359	1504	NM_001127671	LIFR
hsa_circ_0003977	3.73279	P	6.51718	P	0.145149	6.88945	down	circRNA	TTTGGGGGTGGATTTCCTTCAGCATAAACAAATGTAAAAATTACTATGAAGTACTTGGAG	NA	circbase	NA	NA	NA	NA	NA	NA	NA	NA	NA	NA	NA	hsa_circ_0003977	chr4	100829867	100844342	-	14475	332	NM_001031723	DNAJB14
hsa_circ_0054092	3.31914	P	1.13737	A	4.5371	4.5371	up	circRNA	GTGTTTCCTCATGTTTCTTATAAACACCGACCGATGTAAAGGAAAAACAGAAAAAACTTG	NA	circbase	NA	NA	NA	NA	NA	NA	NA	NA	NA	NA	NA	hsa_circ_0054092	chr2	37283582	37306474	-	22892	2273	NM_019024	HEATR5B
hsa_circ_0028397	3.165	A	4.66062	P	0.354629	2.81985	down	circRNA	CATTGCTAAGCTTGTAAATCAGCTTCTGAAACAAAAGTGATATCTCACGCTGTCAGGCAG	NA	circbase	NA	NA	NA	NA	NA	NA	NA	NA	NA	NA	NA	hsa_circ_0028397	chr12	112672880	112681813	-	8933	1402	NM_001109662	C12orf51
hsa_circ_0077986	3.57239	P	2.15458	A	2.6718	2.6718	up	circRNA	ATTCAACTTTTGAAGGTGGCACAAGCAAGTTCTAGCGAGCGCGGCGCCCTTGAGCTGCAC	NA	circbase	NA	NA	NA	NA	NA	NA	NA	NA	NA	NA	NA	hsa_circ_0077986	chr6	137019626	137113656	-	94030	1167	NM_005923	MAP3K5
hsa_circ_0008783	3.4083	P	4.44364	P	0.487902	2.04959	down	circRNA	TGCTAAGTGGATCGAGTTATACAAAAAGACAAAGGCCCATATTATACACACCTTGGGGCA	NA	circbase	NA	NA	NA	NA	NA	NA	NA	NA	NA	NA	NA	hsa_circ_0008783	chr10	70411602	70412351	+	749	185	NM_030625	TET1
hsa_circ_0029110	3.39633	P	1.16011	A	4.71162	4.71162	up	circRNA	GAAGAGCCAGATCATTCTAAAGAGTGGCAGTTCTTGGATTGAATTTCTAAATAATGAAGA	NA	circbase	NA	NA	NA	NA	NA	NA	NA	NA	NA	NA	NA	hsa_circ_0029110	chr12	123052807	123062338	+	9531	1237	NM_014708	KNTC1
hsa_circ_0087257	4.14748	P	2.65462	A	2.81447	2.81447	up	circRNA	ACAGAAGGATGGAATTGAAAATTCGGTTTTTACTCTAAGTGAAGGACATTCAGCCCAGAT	NA	circbase	NA	NA	NA	NA	NA	NA	NA	NA	NA	NA	NA	hsa_circ_0087257	chr9	79954431	79966362	+	11931	1041	NM_033305	VPS13A
hsa_circ_0017650	3.05461	A	4.23239	P	0.442034	2.26227	down	circRNA	ACTCCGGCAGGATGGACTCAGGGTCCCGAGGCAAGTCAGACTGTTGCAGAGGCTGAAAAC	NA	circbase	NA	NA	NA	NA	NA	NA	NA	NA	NA	NA	NA	hsa_circ_0017650	chr10	7657944	7697638	-	39694	849	NM_030569	ITIH5
hsa_circ_0039194	3.44154	P	5.39175	P	0.258778	3.86431	down	circRNA	CCAGTGAAACAATAAAGATGCTATTAACAAGTGGATTCCATAATGAATTTGGTATCCACG	NA	circbase	NA	NA	NA	NA	NA	NA	NA	NA	NA	NA	NA	hsa_circ_0039194	chr16	46693588	46705772	-	12184	1818	NM_018206	VPS35
hsa_circ_0072896	6.83191	P	4.4923	P	5.06164	5.06164	up	circRNA	TAACTGAAAGACTCCTCAACACATGGAAGATCAATCGCGTAAAGATTTTGAAGAGGAAGA	NA	circbase	NA	NA	NA	NA	NA	NA	NA	NA	NA	NA	NA	hsa_circ_0072896	chr5	70800447	70840334	+	39887	4322	NM_018429	BDP1
hsa_circ_0049317	4.86362	P	3.0093	A	3.61584	3.61584	up	circRNA	TTTATTGTAACTTACAGCTCGGACATCATCATGCAGCTGGACGACGTGGTTAGCAGTACT	NA	circbase	NA	NA	NA	NA	NA	NA	NA	NA	NA	NA	NA	hsa_circ_0049317	chr19	10817977	10824043	+	6066	858	NM_031209	QTRT1
hsa_circ_0050809	5.39094	P	7.40531	P	0.247523	4.04002	down	circRNA	AACGCCAGAAGCCAGGGGTTGGCCGGAGACCTACGACATGAATACCTCGGAGCCCAAGAC	NA	circbase	NA	NA	NA	NA	NA	NA	NA	NA	NA	NA	NA	hsa_circ_0050809	chr19	38631823	38643607	+	11784	518	NM_015073	SIPA1L3
hsa_circ_0044980	3.63489	P	4.68673	P	0.482353	2.07317	down	circRNA	TGGATCTTCTGGAGAGCAGTCCTACATGGAAAGTGTTGTGACTTTTCTGCAGGATGTTGT	NA	circbase	NA	NA	NA	NA	NA	NA	NA	NA	NA	NA	NA	hsa_circ_0044980	chr17	58761342	58885437	+	124095	393	NM_001099432	BCAS3
hsa_circ_0011649	3.67461	P	2.61404	A	2.08576	2.08576	up	circRNA	ATATCATCTTGTGGACAAAGAACATGACAGGGGTTTCACAGACCAGCTGCGTAAGATTTC	NA	circbase	NA	NA	NA	NA	NA	NA	NA	NA	NA	NA	NA	hsa_circ_0011649	chr1	36492714	36520746	+	28032	1068	NM_024852	EIF2C3
hsa_circ_0057487	4.93471	P	6.55345	P	0.325621	3.07106	down	circRNA	GTTAGAGCTGTGATCTCGGAAGCTGAAAAGGCAAAACAGAAGATAGCTCCAGTTTTCTTC	NA	circbase	NA	NA	NA	NA	NA	NA	NA	NA	NA	NA	NA	hsa_circ_0057487	chr2	191073605	191155211	-	81606	741	NM_014362	HIBCH
hsa_circ_0057604	4.89334	P	3.74937	P	2.20988	2.20988	up	circRNA	GGAGCACTAGCCATACTTCTTTCTTATCTTTACTATGTGTTTAAGGAATCTGAGAAGATA	NA	circbase	NA	NA	NA	NA	NA	NA	NA	NA	NA	NA	NA	hsa_circ_0057604	chr2	197710605	197755635	-	45030	1197	NM_024989	PGAP1
hsa_circ_0011573	3.76819	P	4.79306	P	0.491454	2.03478	down	circRNA	CAATTAAATGCATATGTTCTCCAAGAACCACCTAAAGATGCCAGTGAGAGCAGGTGCCAG	NA	circbase	NA	NA	NA	NA	NA	NA	NA	NA	NA	NA	NA	hsa_circ_0011573	chr1	35940405	35972736	-	32331	873	NM_024874	KIAA0319L
hsa_circ_0091102	5.70214	P	4.42006	P	2.4319	2.4319	up	circRNA	CAATCTTCAGGTGCTGATTGTCAGGAAGTTCCACAAGATAAAGATGGCTATAAAAGTTGT	NA	circbase	NA	NA	NA	NA	NA	NA	NA	NA	NA	NA	NA	hsa_circ_0091102	chrX	76937011	76938943	-	1932	1932	NM_000489	ATRX
hsa_circ_0067852	2.86019	A	4.17991	P	0.400612	2.49618	down	circRNA	AATAAAGAGATTGAGCAAGTGCCTCTGTGGCGGAGACAGCCAGGTTGGCAGCTGACGGGA	NA	circbase	NA	NA	NA	NA	NA	NA	NA	NA	NA	NA	NA	hsa_circ_0067852	chr3	160939098	160969795	+	30697	2728	NM_015938	NMD3
hsa_circ_0083482	2.5828	A	4.01011	P	0.371823	2.68945	down	circRNA	CCAGATACTAGCAGAGACATTTGTTTGGGTGAACAATGCATCTGCACATTCCCAGAGTGT	NA	circbase	NA	NA	NA	NA	NA	NA	NA	NA	NA	NA	NA	hsa_circ_0083482	chr8	18793543	18793652	-	109	109	NM_015310	PSD3
hsa_circ_0077385	5.00809	P	3.81071	P	2.29323	2.29323	up	circRNA	TATGGACAAGATTGTCTGAGTTTCCACATTTTCGAAATAATCATAAAACTGCAAGGACAT	NA	circbase	NA	NA	NA	NA	NA	NA	NA	NA	NA	NA	NA	hsa_circ_0077385	chr6	90571844	90578801	+	6957	5376	NM_012115	CASP8AP2
hsa_circ_0049649	11.6869	P	12.7167	P	0.4898	2.04165	down	circRNA	CGTAACAAAGGGTGAGTGGAAGCCCCGGCAGATCGACAACCCAGATTACAAGGGCACTTG	NA	circbase	NA	NA	NA	NA	NA	NA	NA	NA	NA	NA	NA	hsa_circ_0049649	chr19	13051557	13054443	+	2886	237	NM_004343	CALR
hsa_circ_0079487	1.75796	A	3.46006	P	0.307337	3.25376	down	circRNA	AGGAACACGGGAGTATGTTGGATAAAGGACATTGTTGTGGCAGTAACTGGAGAGAACATG	NA	circbase	NA	NA	NA	NA	NA	NA	NA	NA	NA	NA	NA	hsa_circ_0079487	chr7	16445685	16445962	-	277	277	NM_001101426	ISPD
hsa_circ_0055029	4.37002	P	5.45	P	0.473036	2.11401	down	circRNA	ATCCACCATATGTGCAGGAGAGAACAAATCCGTCAAGGCCTAGAAGAACTCCAGAAAGTT	NA	circbase	NA	NA	NA	NA	NA	NA	NA	NA	NA	NA	NA	hsa_circ_0055029	chr2	69297778	69318051	+	20273	407	NM_032208	ANTXR1
hsa_circ_0067421	1.95761	A	3.68909	P	0.301143	3.32068	down	circRNA	GTTAGAGGCAGAGGACGGAGTCCCAGAGAACTACAACTCCCATCAAGCACTTGGGGGATC	NA	circbase	NA	NA	NA	NA	NA	NA	NA	NA	NA	NA	NA	hsa_circ_0067421	chr3	133524519	133540336	+	15817	2715	NM_021203	SRPRB
hsa_circ_0017385	2.91194	A	5.57771	P	0.157588	6.34566	down	circRNA	AGAACACCTTTGAGTTCAACAACCGGATCCGAACCAACCAAAGCCGGAGGGGGCCCAGAT	NA	circbase	NA	NA	NA	NA	NA	NA	NA	NA	NA	NA	NA	hsa_circ_0017385	chr10	412214	460050	-	47836	1409	NM_014974	DIP2C
hsa_circ_0039727	3.7478	P	1.97993	A	3.40552	3.40552	up	circRNA	TTTTGGATCACCAAGTACACATTTGTCGTGCCTGAAGACACCCGTGTGGGCACCTCTGTG	NA	circbase	NA	NA	NA	NA	NA	NA	NA	NA	NA	NA	NA	hsa_circ_0039727	chr16	66424305	66426888	+	2583	1038	NM_001795	CDH5
hsa_circ_0073352	4.4305	P	3.36731	A	2.08954	2.08954	up	circRNA	CAGTCTGCAGGTGTTTTATTCCAAACGTCTATGCTGCTTTGTTCACTGCAGCTCTTGTTC	NA	circbase	NA	NA	NA	NA	NA	NA	NA	NA	NA	NA	NA	hsa_circ_0073352	chr5	90368263	90398157	+	29894	280	NM_032119	GPR98
hsa_circ_0000979	3.20015	A	4.46064	P	0.417403	2.39577	down	circRNA	CACACAACAATGGAGTGGTGGTAGGTTCCCATGAGTGTTTGCAATGGTGGGGTGGTGAGG	NA	circbase	NA	NA	NA	NA	NA	NA	NA	NA	NA	NA	NA	hsa_circ_0000979	chr2	19042277	19042456	+	179	179	TCONS_00003590	TCONS_00003590
hsa_circ_0082761	3.86606	P	1.70698	A	4.46631	4.46631	up	circRNA	CCTGTCAATATTGATGTACGAAAAACGTTTTTCACCTTAGCATTTTGTGACTTTTGTCGA	NA	circbase	NA	NA	NA	NA	NA	NA	NA	NA	NA	NA	NA	hsa_circ_0082761	chr7	140494107	140501360	-	7253	429	NM_004333	BRAF
hsa_circ_0002715	2.48737	A	4.32835	P	0.279133	3.58252	down	circRNA	CCACAGCGAAAGGGTGAATTTGGAAGTGAAAAGAAAACTGCTTTGCATGAAAAAGAGGAG	NA	circbase	NA	NA	NA	NA	NA	NA	NA	NA	NA	NA	NA	hsa_circ_0002715	chr21	47801608	47805898	+	4290	299	NM_006031	PCNT
hsa_circ_0079601	4.82307	P	2.04189	A	6.87415	6.87415	up	circRNA	TATTCCAGTAAGGACCAAGCTAGACAGTAAAATAGAACTGCACGGGAAACCCATAGAAGT	NA	circbase	NA	NA	NA	NA	NA	NA	NA	NA	NA	NA	NA	hsa_circ_0079601	chr7	23401152	23508161	-	107009	226	NM_006547	IGF2BP3
hsa_circ_0079710	6.60233	P	1.11138	A	44.9719	44.9719	up	circRNA	TCTGAAAGAACCCGTCACTCGTATAAAAACCTATGCTTTGAAGGTTCTCGTGTGTCTCGG	NA	circbase	NA	NA	NA	NA	NA	NA	NA	NA	NA	NA	NA	hsa_circ_0079710	chr7	30634180	30661116	+	26936	1824	NM_002047	GARS
hsa_circ_0022993	7.28076	P	6.26166	P	2.02665	2.02665	up	circRNA	TTGTAAACCAACACAAGTCCAACTCCATCAAGCGGCAGACGCCTGCGAAGATGGCCGCTG	NA	circbase	NA	NA	NA	NA	NA	NA	NA	NA	NA	NA	NA	hsa_circ_0022993	chr11	66278118	66283404	+	5286	603	NM_024649	BBS1
hsa_circ_0084938	5.76069	P	4.37717	P	2.60903	2.60903	up	circRNA	TATATTATGATTGCACAGACCCCTGGTACAGTGTGGGAGGTGACAACACAGGATATTAAT	NA	circbase	NA	NA	NA	NA	NA	NA	NA	NA	NA	NA	NA	hsa_circ_0084938	chr8	95756712	95757312	+	600	600	NM_181787	DPY19L4
hsa_circ_0075791	3.97061	P	2.34013	A	3.09617	3.09617	up	circRNA	TTTCACATGTGTGCAGTGTATTGATTATTCTGGAGATGAAGTGCAGGTTACCACTACAGA	NA	circbase	NA	NA	NA	NA	NA	NA	NA	NA	NA	NA	NA	hsa_circ_0075791	chr6	18208362	18224084	+	15722	2539	NM_153042	KDM1B
hsa_circ_0024677	6.38111	P	1.21274	A	35.9613	35.9613	up	circRNA	TATAATGTCTACTACAGCTACCGGAAGATTTCTGGGGACACTTGTAGCGGAGGAGATGTT	NA	circbase	NA	NA	NA	NA	NA	NA	NA	NA	NA	NA	NA	hsa_circ_0024677	chr11	121421293	121475948	+	54655	2598	NM_003105	SORL1
hsa_circ_0008606	2.38847	A	3.44082	P	0.482182	2.0739	down	circRNA	CGATGGCTAAACTCATCCTTCAAAGAAACACTTGCAGAACACAGAGAAGTACGGCATACC	NA	circbase	NA	NA	NA	NA	NA	NA	NA	NA	NA	NA	NA	hsa_circ_0008606	chr1	78324622	78329713	+	5091	513	NM_198549	FAM73A
hsa_circ_0038275	6.12032	P	9.25601	M	0.113779	8.78893	down	circRNA	CTTTTCAAAGTCAGGGAGAAGGTGTTCGTCTGCTGCCTAGAGAAAAATCTGAAGTTCAGA	NA	circbase	NA	NA	NA	NA	NA	NA	NA	NA	NA	NA	NA	hsa_circ_0038275	chr16	18853529	18863527	-	9998	1553	NM_015092	SMG1
hsa_circ_0085230	6.93933	P	13.0258	M	0.0147156	67.9553	down	circRNA	GATGAAGACGGCCCAAGTTGTTTTACAAGGCAAATCCAGAAGTGTCATTATTCGAGAACT	NA	circbase	NA	NA	NA	NA	NA	NA	NA	NA	NA	NA	NA	hsa_circ_0085230	chr8	103300382	103358623	-	58241	4249	NM_015902	UBR5
hsa_circ_0002257	6.62224	P	4.08868	P	5.78998	5.78998	up	circRNA	ATGGACATCAAGTTTGGCTGAATTGGAAGTGTTATGTACTCATCTCTACATAGGGACTGA	NA	circbase	NA	NA	NA	NA	NA	NA	NA	NA	NA	NA	NA	hsa_circ_0002257	chr5	170305100	170308900	+	3800	238	NM_022897	RANBP17
hsa_circ_0091089	5.66608	P	6.76507	P	0.466844	2.14204	down	circRNA	GCTGCCAAAGCCTTGTTTTCAGCCAGTCCCTCATATCTCTGGACTTGATTGAAGATTTTC	NA	circbase	NA	NA	NA	NA	NA	NA	NA	NA	NA	NA	NA	hsa_circ_0091089	chrX	76812921	76845410	-	32489	589	NM_000489	ATRX
hsa_circ_0032357	1.25795	A	4.65437	P	0.0949675	10.5299	down	circRNA	AATAAAACTCCTGTATGTTCAGGTGCAGTGCCATACTTACACTGGGTACTGCTGGTGTGT	NA	circbase	NA	NA	NA	NA	NA	NA	NA	NA	NA	NA	NA	hsa_circ_0032357	chr14	70442431	70442531	+	100	100	NM_001034852	SMOC1
hsa_circ_0065737	3.91607	P	2.83661	A	2.11325	2.11325	up	circRNA	ATTAAATTATTATTCCATACAGGCTGTGGCTTCGGGTACCGCTATACACGGCTGCCACAT	NA	circbase	NA	NA	NA	NA	NA	NA	NA	NA	NA	NA	NA	hsa_circ_0065737	chr3	49751522	49758962	+	7440	1244	NM_022064	RNF123
hsa_circ_0062458	4.65055	P	7.13569	P	0.178607	5.59889	down	circRNA	AAGAAAGAAGCTAACCCCAAGCTGAACATGGTGAAGTTCCTGCAGGGATCCGCGGTGCGG	NA	circbase	NA	NA	NA	NA	NA	NA	NA	NA	NA	NA	NA	hsa_circ_0062458	chr22	22326983	22337147	-	10164	744	NM_003935	TOP3B
hsa_circ_0060049	3.19638	A	6.18893	P	0.125647	7.95879	down	circRNA	TGTCTTTAAGAACTGGTTAAAGTCCTATGGCTATCTGCTTCCCTATGACTCACGGGCATC	NA	circbase	NA	NA	NA	NA	NA	NA	NA	NA	NA	NA	NA	hsa_circ_0060049	chr20	33834642	33855222	+	20580	948	NM_006690	MMP24
hsa_circ_0071487	3.32243	P	1.97943	A	2.53678	2.53678	up	circRNA	CGAAACACAGAGGGTTGTCCTGGTCTGTGCAACAGCAATGGAAGATGTACCCTGGACCAA	NA	circbase	NA	NA	NA	NA	NA	NA	NA	NA	NA	NA	NA	hsa_circ_0071487	chr4	183635239	183652292	+	17053	746	NM_001080477	ODZ3
hsa_circ_0043574	6.4479	P	3.56862	P	7.3578	7.3578	up	circRNA	TTACTGATGCAAACTAAAACAATCCCTGGAAGCCTCCTTGGCAGAAACAGAAGGTCGCTA	NA	circbase	NA	NA	NA	NA	NA	NA	NA	NA	NA	NA	NA	hsa_circ_0043574	chr17	38974368	38975986	-	1618	959	NM_000421	KRT10
hsa_circ_0056135	5.22547	P	12.1959	P	0.00797434	125.402	down	circRNA	CATGTGCTCAGTCACGAGCCCGGGCTGGTACAGTTGGTGAATTACTACAGGGGTGCTGAC	NA	circbase	NA	NA	NA	NA	NA	NA	NA	NA	NA	NA	NA	hsa_circ_0056135	chr2	113243493	113278002	+	34509	862	NM_153712	TTL
hsa_circ_0019118	3.8379	P	2.06284	A	3.42251	3.42251	up	circRNA	ACTTGCTCATTAAAATGAAAGTAGCTGTGAGCGGATGATGTCAGCGCTCTTCTGACAGCA	NA	circbase	NA	NA	NA	NA	NA	NA	NA	NA	NA	NA	NA	hsa_circ_0019118	chr10	93608139	93625232	+	17093	3619	NM_025235	TNKS2
hsa_circ_0049224	10.5197	P	12.9475	M	0.185849	5.38072	down	circRNA	ATCAAGGAAGAAGACAAAGACCAGCTGAACCTTCACCTAGCCCCAGGATTACAAGGAAAA	NA	circbase	NA	NA	NA	NA	NA	NA	NA	NA	NA	NA	NA	hsa_circ_0049224	chr19	10286215	10288043	-	1828	155	NM_001130823	DNMT1
hsa_circ_0074520	2.28331	A	6.09793	P	0.0710701	14.0706	down	circRNA	TGTCCAGAGCCTGGAACTGTGCCCACACCAGAAGCCATCAGCAGCAAGCTCCTGAGGCTG	NA	circbase	NA	NA	NA	NA	NA	NA	NA	NA	NA	NA	NA	hsa_circ_0074520	chr5	149534959	149535422	-	463	463	NM_002609	PDGFRB
hsa_circ_0056096	4.49571	P	5.78455	P	0.40928	2.44332	down	circRNA	AATTTGTTCACTTGTTGAACTTCTCGTTCAGTTGGCAAGCGCGTCCATTTGAACGTCTCG	NA	circbase	NA	NA	NA	NA	NA	NA	NA	NA	NA	NA	NA	hsa_circ_0056096	chr2	112592180	112641741	-	49561	2631	NM_022662	ANAPC1
hsa_circ_0022563	3.90252	P	1.24346	A	6.31624	6.31624	up	circRNA	TGGCTCAAAGCTCATTTTTCTACTGCTCGTGGTAAGTGGCTTCGTGGTCTTTATAGCTGT	NA	circbase	NA	NA	NA	NA	NA	NA	NA	NA	NA	NA	NA	hsa_circ_0022563	chr11	62621272	62623357	-	2085	312	NR_003098	SNHG1
hsa_circ_0027662	3.30086	P	2.22987	A	2.10087	2.10087	up	circRNA	TTTTATTTCCTGTTGACTTCACCTGAACCTAAAATGGTGAGCGAGAGTCACCATGAGGCC	NA	circbase	NA	NA	NA	NA	NA	NA	NA	NA	NA	NA	NA	hsa_circ_0027662	chr12	79611282	79845788	+	234506	4170	NM_001135805	SYT1
hsa_circ_0046798	3.61495	P	2.09202	A	2.87373	2.87373	up	circRNA	CTGGTTACAGGTGGCTGCCTCTTTGATGAGCCGTATAGCACATGTGGATATAGTCAATCT	NA	circbase	NA	NA	NA	NA	NA	NA	NA	NA	NA	NA	NA	hsa_circ_0046798	chr18	7774146	7926681	+	152535	590	NM_001105244	PTPRM
hsa_circ_0036422	3.50719	P	2.33702	A	2.25039	2.25039	up	circRNA	AGCAACTTAGATTGATCATTCTTAGAAGAGCTGCTGTAACACATAGGGGAAGTGAAAACT	NA	circbase	NA	NA	NA	NA	NA	NA	NA	NA	NA	NA	NA	hsa_circ_0036422	chr15	77450844	77474382	-	23538	3445	NM_024776	PEAK1
hsa_circ_0012326	4.26577	P	5.79283	P	0.346985	2.88197	down	circRNA	TTTTGCTACAGAATCTGACTCTGCAAGAAAACTGCCTGGAGCAGTTGGAGATGGGATTTC	NA	circbase	NA	NA	NA	NA	NA	NA	NA	NA	NA	NA	NA	hsa_circ_0012326	chr1	46745863	46746232	-	369	264	NM_006369	LRRC41
hsa_circ_0055091	5.42123	P	12.1545	M	0.00939881	106.396	down	circRNA	TCTCTGTCAGCTGCACCGATGAAGACGCCATTATTAGCGTCCTTGCCTACCGCAACACCG	NA	circbase	NA	NA	NA	NA	NA	NA	NA	NA	NA	NA	NA	hsa_circ_0055091	chr2	70031664	70037805	+	6141	380	NM_001153	ANXA4
hsa_circ_0076558	2.32541	A	3.77029	P	0.367321	2.72241	down	circRNA	GCGGAAAAATCTGCTATATTAGGAAATTCCTGTTAATGATGGAATAGAGCTATTGCAGAT	NA	circbase	NA	NA	NA	NA	NA	NA	NA	NA	NA	NA	NA	hsa_circ_0076558	chr6	43501643	43519190	-	17547	871	NM_020750	XPO5
hsa_circ_0077423	4.38106	P	6.02027	P	0.321034	3.11494	down	circRNA	TTTAGCACCATTCTGCTCTGCTACTTGTAAGGCTGGCTTGAGTCTTCGTAAAGTAAACAG	NA	circbase	NA	NA	NA	NA	NA	NA	NA	NA	NA	NA	NA	hsa_circ_0077423	chr6	99887644	99887731	-	87	87	NM_001080481	USP45
hsa_circ_0055324	6.90389	P	3.02265	A	14.7357	14.7357	up	circRNA	ATATGCTCTACATTCGGCAGATGGCACTCAGCCTGGAGGGGACAGCTCGGAGGAGCTGGG	NA	circbase	NA	NA	NA	NA	NA	NA	NA	NA	NA	NA	NA	hsa_circ_0055324	chr2	74666677	74667710	-	1033	658	NM_033046	RTKN
hsa_circ_0040352	3.80044	P	2.66687	A	2.19401	2.19401	up	circRNA	ATAGAAGTATTAGATGTGAGCTATAATCTTCTCACAGAGGTTCCCGTGAGGCGTGTGCCA	NA	circbase	NA	NA	NA	NA	NA	NA	NA	NA	NA	NA	NA	hsa_circ_0040352	chr16	71703177	71749137	-	45960	2067	NM_015020	PHLPP2
hsa_circ_0062470	4.57097	P	3.14916	A	2.67921	2.67921	up	circRNA	TTTGAGGATAAGCTGCTGATGAGCGGGAATGTTTAATTCAGCCTTGGAAGTGGCCAAATT	NA	circbase	NA	NA	NA	NA	NA	NA	NA	NA	NA	NA	NA	hsa_circ_0062470	chr22	22664100	22664248	+	148	148	NR_027293	LOC96610
hsa_circ_0083668	5.59679	P	7.18455	P	0.332687	3.00583	down	circRNA	GCAGAAGAAGGGATCGGACCCATCCACCTCAACGAGATCCAGTGCACAGGCAATGAGAAG	NA	circbase	NA	NA	NA	NA	NA	NA	NA	NA	NA	NA	NA	hsa_circ_0083668	chr8	23179642	23179794	-	152	152	NM_002318	LOXL2
hsa_circ_0021747	3.5093	P	1.13963	A	5.16825	5.16825	up	circRNA	TGTGAAAATCGATGTGGCCAGGTTCTGCGAGCCCCAAAGGGTCAGATTTTGTTGGAAAGC	NA	circbase	NA	NA	NA	NA	NA	NA	NA	NA	NA	NA	NA	hsa_circ_0021747	chr11	35489548	35496292	-	6744	441	NM_015430	PAMR1
hsa_circ_0029863	2.60255	A	3.79509	P	0.43753	2.28556	down	circRNA	AGAAATGATGTCATAGAGGAAGACCTTGCAAAGCAGTTCCTACAGAGGTTGACAGCTACC	NA	circbase	NA	NA	NA	NA	NA	NA	NA	NA	NA	NA	NA	hsa_circ_0029863	chr13	28840851	28854678	+	13827	908	NM_175854	PAN3
hsa_circ_0062953	2.63174	A	3.69017	P	0.480157	2.08265	down	circRNA	TATAGCCGAGGTATGAATCCTAGGACCCAGAATAAGGATTCTCTAGAGGACAGTGTTTCT	NA	circbase	NA	NA	NA	NA	NA	NA	NA	NA	NA	NA	NA	hsa_circ_0062953	chr22	32229900	32234831	+	4931	411	NM_001242896	DEPDC5
hsa_circ_0077158	6.23185	P	5.0794	P	2.22292	2.22292	up	circRNA	TTGTTTTATGAAAAGTCATGCCCATTTGGAAGAGTCCCAGTTAACCTTCTAAATAGCCCA	NA	circbase	NA	NA	NA	NA	NA	NA	NA	NA	NA	NA	NA	hsa_circ_0077158	chr6	80721602	80721697	+	95	95	NM_001166691	TTK
hsa_circ_0092241	1.10397	A	11.7182	M	0.000637981	1567.45	down	circRNA	TACCAGATCTTACAGACTTCATCACCTGATTCTTCCAATGAGAATTCCGTAGCAACTCCT	NA	circbase	NA	NA	NA	NA	NA	NA	NA	NA	NA	NA	NA	hsa_circ_0092241	chrY	14832521	14968421	+	135900	7125	NM_004654	USP9Y
hsa_circ_0059118	6.21944	P	7.33074	P	0.462876	2.1604	down	circRNA	AAGGAAAATGGTATCGAGAACCTTCCCTGCGAACTTCAGAGGAACTTCCAGCTGATGCGA	NA	circbase	NA	NA	NA	NA	NA	NA	NA	NA	NA	NA	NA	hsa_circ_0059118	chr2	242644067	242662686	+	18619	643	NM_032329	ING5
hsa_circ_0055369	4.4435	P	3.18563	A	2.39143	2.39143	up	circRNA	CAAAACTACAATGCTGTAGAAAACAAAACATCACCTCATTCAAAGTTCCAAGAAAGACAG	NA	circbase	NA	NA	NA	NA	NA	NA	NA	NA	NA	NA	NA	hsa_circ_0055369	chr2	75889831	75899142	-	9311	2417	NM_003203	GCFC2
hsa_circ_0077240	3.94359	P	2.32255	A	3.07596	3.07596	up	circRNA	GTCAAAGAGGGAAGAGTTCCAAGAATATCTACAGCAGTTAGGACTTCAGGAATTATTTCC	NA	circbase	NA	NA	NA	NA	NA	NA	NA	NA	NA	NA	NA	hsa_circ_0077240	chr6	86237979	86282092	-	44113	1734	NM_153816	SNX14
hsa_circ_0050362	5.21464	P	6.42877	P	0.431034	2.32	down	circRNA	AGAGATAGAAGTGTCCCTAATTTAACCGAAGGTTCTTTGCATGAGAGGCTGGCGAAGGTT	NA	circbase	NA	NA	NA	NA	NA	NA	NA	NA	NA	NA	NA	hsa_circ_0050362	chr19	33090609	33098738	-	8129	744	NM_032139	ANKRD27
hsa_circ_0030439	4.3969	P	1.65573	A	6.68613	6.68613	up	circRNA	CGAGTCACTGTCAAATATAATTTTGAGGACTGAACAAAATTCAGGAAGGACTATTCTCAT	NA	circbase	NA	NA	NA	NA	NA	NA	NA	NA	NA	NA	NA	hsa_circ_0030439	chr13	76197406	76335174	+	137768	298	NM_005358	LMO7
hsa_circ_0016071	3.05905	A	4.31874	P	0.417635	2.39444	down	circRNA	TTTCTATCAACAGTGCTTATACCTCCAAGATTCTGGTCTGTCTGGGAACCCTGCAGATCT	NA	circbase	NA	NA	NA	NA	NA	NA	NA	NA	NA	NA	NA	hsa_circ_0016071	chr1	203667284	203677232	+	9948	1364	NM_001001396	ATP2B4
hsa_circ_0056119	2.69262	A	4.15294	P	0.363412	2.7517	down	circRNA	ACTGTTCCAGCTATCACTGAGGCAAGGGAAGAAGCCAAGCCTTACCCGCTATTCCCGGGA	NA	circbase	NA	NA	NA	NA	NA	NA	NA	NA	NA	NA	NA	hsa_circ_0056119	chr2	112686696	112705144	+	18448	696	NM_006343	MERTK
hsa_circ_0087207	3.67884	P	1.28426	A	5.25826	5.25826	up	circRNA	ATGGAAGAGAACTTGGAATTTCCCGTTGGTTATGCTCATTTGGAAGATAGGGCCTGCACT	NA	circbase	NA	NA	NA	NA	NA	NA	NA	NA	NA	NA	NA	hsa_circ_0087207	chr9	75520873	75540528	-	19655	929	NM_000689	ALDH1A1
hsa_circ_0056952	4.5778	P	3.43149	A	2.21347	2.21347	up	circRNA	TGTAATTCAGTTATTTGAAAAATAGTTTCATACCAACTGAGGTGTCTGTTCTGGTCCGTG	NA	circbase	NA	NA	NA	NA	NA	NA	NA	NA	NA	NA	NA	hsa_circ_0056952	chr2	170387096	170403214	-	16118	1228	NM_024622	FASTKD1
hsa_circ_0050922	8.35011	P	9.39379	P	0.485089	2.06148	down	circRNA	GCCCGCAGCGGCCGTGGTTGGGGACGCCCAGTACCACCACTTCCGCCACCGCCTGCCGCT	NA	circbase	NA	NA	NA	NA	NA	NA	NA	NA	NA	NA	NA	hsa_circ_0050922	chr19	39261607	39261779	-	172	172	NM_002307	LGALS7
hsa_circ_0047727	5.00969	P	2.07115	A	7.66634	7.66634	up	circRNA	TTCACTCATGATGGCCATCACAGCAGTGACCCTTGGAGCTCCTCCAGTGGGATGAATCAG	NA	circbase	NA	NA	NA	NA	NA	NA	NA	NA	NA	NA	NA	hsa_circ_0047727	chr18	52921727	52942983	-	21256	695	NM_001083962	TCF4
hsa_circ_0089915	4.95728	P	10.1648	M	0.0270628	36.9511	down	circRNA	ATGTCTACAAGTTAAGATGCCATACTGTTGAAAGCAGTAAACCAAACACTCTTACGTTAA	NA	circbase	NA	NA	NA	NA	NA	NA	NA	NA	NA	NA	NA	hsa_circ_0089915	chrX	14936801	14936904	+	103	103	NM_152581	MOSPD2
hsa_circ_0045166	2.72001	A	3.87348	P	0.449543	2.22448	down	circRNA	GGCATCATTGATGGAGGGAGCGAGGAACCACCGGATCGAAGACAGTCAAGTGTAGACTCT	NA	circbase	NA	NA	NA	NA	NA	NA	NA	NA	NA	NA	NA	hsa_circ_0045166	chr17	61151303	61278318	+	127015	480	NM_025185	TANC2
hsa_circ_0038331	2.11899	A	3.86225	P	0.298693	3.34792	down	circRNA	TAGGAAACAAAATCTGTTTATGGGATCTGAAAAAGGCAAAGCTGGGACTGCCACATTGGC	NA	circbase	NA	NA	NA	NA	NA	NA	NA	NA	NA	NA	NA	hsa_circ_0038331	chr16	19586419	19637545	+	51126	863	NM_020314	C16orf62
hsa_circ_0044500	7.76581	P	4.15584	P	12.2099	12.2099	up	circRNA	CAGAAAGGAGGAGATGGACAAGCTCCTGGAGGAGCTCCAGATCAAGCATGCGGTCACTGA	NA	circbase	NA	NA	NA	NA	NA	NA	NA	NA	NA	NA	NA	hsa_circ_0044500	chr17	48212917	48216681	-	3764	381	NM_032595	PPP1R9B
hsa_circ_0007260	7.37686	P	3.08148	A	19.6353	19.6353	up	circRNA	AGATACAGAGAGGTAAAGTACATTTATGGAGAACATCGGGGTGAATGCCAAAGCGGCTTA	NA	circbase	NA	NA	NA	NA	NA	NA	NA	NA	NA	NA	NA	hsa_circ_0007260	chr1	165854378	165855945	+	1567	1567	NM_012474	UCK2
hsa_circ_0082284	3.61849	P	2.36567	A	2.38306	2.38306	up	circRNA	TATTTCTGTCACCCCTGTGGCAACTCCAGAATGAGGTGCAGAACATCAAGTTCAACAGTT	NA	circbase	NA	NA	NA	NA	NA	NA	NA	NA	NA	NA	NA	hsa_circ_0082284	chr7	128845043	128851611	+	6568	1399	NM_005631	SMO
hsa_circ_0046796	3.52292	P	1.21509	A	4.95138	4.95138	up	circRNA	ATATCACTGGGTCACAATCACTCTGGACTTAAGACAGGCCTGTTTCCTGCCATTCTCAAT	NA	circbase	NA	NA	NA	NA	NA	NA	NA	NA	NA	NA	NA	hsa_circ_0046796	chr18	7079973	7080456	-	483	284	NM_005559	LAMA1
hsa_circ_0033522	3.43501	P	5.5003	P	0.238939	4.18516	down	circRNA	TGCTGCTCATGGAAGATCCAAATCCGATGATATTAACTGTTTTCTTGAGCAACAATGAAC	NA	circbase	NA	NA	NA	NA	NA	NA	NA	NA	NA	NA	NA	hsa_circ_0033522	chr14	104212709	104263855	-	51146	1141	NM_015316	PPP1R13B
hsa_circ_0020105	4.93906	P	1.13771	A	13.9418	13.9418	up	circRNA	TTTGAGCTTGGAGATCAGTGCGGTTAATTCTTCAACTATCCAAGCCTCATATTTTGGAAC	NA	circbase	NA	NA	NA	NA	NA	NA	NA	NA	NA	NA	NA	hsa_circ_0020105	chr10	118202566	118220597	+	18031	481	NM_001011709	PNLIPRP3
hsa_circ_0027477	7.24137	P	11.7208	M	0.0448274	22.3078	down	circRNA	ATACATACAGGACCCTGATGCTCCCATAAGACAGAAAATGCCCCTTGATGATCTGGATAG	NA	circbase	NA	NA	NA	NA	NA	NA	NA	NA	NA	NA	NA	hsa_circ_0027477	chr12	69109406	69121169	+	11763	765	NM_020401	NUP107
hsa_circ_0049080	2.9925	A	4.11176	P	0.46033	2.17235	down	circRNA	AGGCCGAGCAGACCTACATCGGCTCTGTGCTCATCTCTGTAAACCCCTTCAAGCAGATGC	NA	circbase	NA	NA	NA	NA	NA	NA	NA	NA	NA	NA	NA	hsa_circ_0049080	chr19	8612919	8619627	-	6708	1128	NM_012335	MYO1F
hsa_circ_0003355	4.52107	P	3.05641	A	2.75998	2.75998	up	circRNA	TAAAAAGCCTGATCTCAGATTGGGGTTTGGGCCTGGGCCCAGGCCACTTGGTCTTGGGTT	NA	circbase	NA	NA	NA	NA	NA	NA	NA	NA	NA	NA	NA	hsa_circ_0003355	chr16	69153592	69153706	+	114	114	NM_001039690	CHTF8
hsa_circ_0050677	1.29191	A	3.92916	P	0.160734	6.22146	down	circRNA	ACCTGCCAAGCACAGCCAGTGTACTGGATGCCTGATTAAGCGTCATGGGGTCTTTCATCC	NA	circbase	NA	NA	NA	NA	NA	NA	NA	NA	NA	NA	NA	hsa_circ_0050677	chr19	36530845	36545664	-	14819	821	NM_152658	THAP8
hsa_circ_0040768	2.56007	A	3.588	P	0.490412	2.0391	down	circRNA	AATGAACTAAGTTGAATAAAGGCACAATTAAAAACTGTCAACGCTGCGTGCCGCTGCTGG	NA	circbase	NA	NA	NA	NA	NA	NA	NA	NA	NA	NA	NA	hsa_circ_0040768	chr16	87425800	87438380	+	12580	2288	NM_022818	MAP1LC3B
hsa_circ_0070281	2.85314	A	4.36769	P	0.350007	2.85709	down	circRNA	TTACTAAGAGGGTTACCTTGGCTTTCATTGGGATCAGTTTGCTGGTTATAGGAACTACAC	NA	circbase	NA	NA	NA	NA	NA	NA	NA	NA	NA	NA	NA	hsa_circ_0070281	chr4	84508407	84516113	+	7706	375	NM_032717	AGPAT9
hsa_circ_0067062	6.31066	P	13.5454	M	0.00663923	150.62	down	circRNA	TCCATCCAAGGGAAATGTTCCACTGCAGCCGAGTGCCCGTGTGTCTGTGTCTGAGAAGAA	NA	circbase	NA	NA	NA	NA	NA	NA	NA	NA	NA	NA	NA	hsa_circ_0067062	chr3	123456224	123456390	-	166	166	NM_053025	MYLK
hsa_circ_0028601	4.053	P	2.98847	A	2.09148	2.09148	up	circRNA	TCTCCTGTGCCAGGGAAAGTTCTATCTGGTCATCGAGGAGCTGAGCCAGCTGTTCCGATC	NA	circbase	NA	NA	NA	NA	NA	NA	NA	NA	NA	NA	NA	hsa_circ_0028601	chr12	117271596	117274087	+	2491	318	NM_001109903	RNFT2
hsa_circ_0010395	6.58223	P	11.853	M	0.0259027	38.606	down	circRNA	AAATCAGCTTCAGGGTGTAGATGTTCTTTGGCAAAAACAAGGTGATGATGGTGGCCTTGG	NA	circbase	NA	NA	NA	NA	NA	NA	NA	NA	NA	NA	NA	hsa_circ_0010395	chr1	19583557	19586622	+	3065	1827	NM_016183	MRTO4
hsa_circ_0036523	3.38379	P	1.89021	A	2.81586	2.81586	up	circRNA	GTAATGGAATAAAGGATGCATGGATCAGAAGTATGGCGTGAGTCCCGAGAACATTATCCT	NA	circbase	NA	NA	NA	NA	NA	NA	NA	NA	NA	NA	NA	hsa_circ_0036523	chr15	81041853	81047962	+	6109	1651	NM_021214	FAM108C1
hsa_circ_0052812	6.03239	P	4.92906	P	2.14851	2.14851	up	circRNA	GATTAGCAATACTTCTTGGCTGTGATTATCTCCCAAAGGAACTTATTTTTTCGTATCTCA	NA	circbase	NA	NA	NA	NA	NA	NA	NA	NA	NA	NA	NA	hsa_circ_0052812	chr2	17942662	17947956	+	5294	475	NM_001130009	GEN1
hsa_circ_0029451	2.22511	A	3.49865	P	0.413644	2.41754	down	circRNA	CAAATTTTGCTTAGTCAATCCCTCCTGAGTCACTGGGATTAAAAGCATACCTAATTATTT	NA	circbase	NA	NA	NA	NA	NA	NA	NA	NA	NA	NA	NA	hsa_circ_0029451	chr12	132416059	132428406	+	12347	1916	NM_025215	PUS1
hsa_circ_0060932	6.63871	P	5.2196	P	2.67421	2.67421	up	circRNA	ACCCAAAGGAACAGCAAACAGTCTAATGTGGATTCTCTACAATTTATCCCGTAATCCCCA	NA	circbase	NA	NA	NA	NA	NA	NA	NA	NA	NA	NA	NA	hsa_circ_0060932	chr20	52774624	52775662	-	1038	246	NM_000782	CYP24A1
hsa_circ_0030080	3.29492	A	4.30286	P	0.497258	2.01103	down	circRNA	GGCGGAACAGGATATGACAGCGCGTGATCTGCTACAGCAGAGATACACCCTTCCAAATGG	NA	circbase	NA	NA	NA	NA	NA	NA	NA	NA	NA	NA	NA	hsa_circ_0030080	chr13	42189111	42407667	-	218556	3295	NM_015058	KIAA0564
hsa_circ_0080731	6.41128	P	2.82003	A	12.0524	12.0524	up	circRNA	AACCTCTTCCAAACAGAATCCCAGGTTCCCAGGCAACCTGCAGATGAGTGACCGCCAGCT	NA	circbase	NA	NA	NA	NA	NA	NA	NA	NA	NA	NA	NA	hsa_circ_0080731	chr7	75210552	75211467	-	915	139	NM_005338	HIP1
hsa_circ_0070482	4.29103	P	5.40218	P	0.462926	2.16017	down	circRNA	GTAAATCAAAAAGTCAAGTAAAGAACAGTTTGCCAGTACAAACATTGCTGAAGAGCTAGT	NA	circbase	NA	NA	NA	NA	NA	NA	NA	NA	NA	NA	NA	hsa_circ_0070482	chr4	99325627	99342545	+	16918	803	NM_001100426	RAP1GDS1
hsa_circ_0072134	3.86797	P	2.78531	A	2.11793	2.11793	up	circRNA	TCCTACCCAGTTTCCATCTTGCTGCTGCAAAAGGACACGTGGAATGCCTCAGGGTCATGA	NA	circbase	NA	NA	NA	NA	NA	NA	NA	NA	NA	NA	NA	hsa_circ_0072134	chr5	34796043	34813765	+	17722	685	NM_001145525	RAI14
hsa_circ_0017182	1.16808	A	3.86089	P	0.154663	6.46568	down	circRNA	AACCTGAACACAAGATCAACTTTATACCTGGGCTGCAGTTAGTCAACCCACACACTCATT	NA	circbase	NA	NA	NA	NA	NA	NA	NA	NA	NA	NA	NA	hsa_circ_0017182	chr1	240341220	240492467	+	151247	2525	NM_020066	FMN2
hsa_circ_0011951	5.04901	P	3.50125	A	2.92362	2.92362	up	circRNA	TTCAGCACAGGATTCGAGGCACAAACCCAGCAGCCTCAACCTAGTTCATGGAGGAGCCTC	NA	circbase	NA	NA	NA	NA	NA	NA	NA	NA	NA	NA	NA	hsa_circ_0011951	chr1	42094419	42094618	-	199	199	NM_024503	HIVEP3
hsa_circ_0087177	1.82123	A	4.4305	P	0.163883	6.10192	down	circRNA	TAACACCAAAGATCAATATGAAAGATAATAAAAATGCCAAATATATTGAAAATCATATTC	NA	circbase	NA	NA	NA	NA	NA	NA	NA	NA	NA	NA	NA	hsa_circ_0087177	chr9	72920162	72965387	+	45225	1701	NM_015110	SMC5
hsa_circ_0034641	2.28663	A	4.36345	P	0.237037	4.21875	down	circRNA	AACTGTCTGCACTGCACATTGACTTGGGCAAGGCAAATGAGCCCAACCACGTGGAGCTGG	NA	circbase	NA	NA	NA	NA	NA	NA	NA	NA	NA	NA	NA	hsa_circ_0034641	chr15	41191104	41196173	+	5069	3323	NM_020857	VPS18
hsa_circ_0033675	7.05099	P	5.29985	P	3.36623	3.36623	up	circRNA	CACAGGTAGCGAGAGCACTGGCAAAGGTGCTGGGGGCCCCTGGACCCGACCCGCCCTGGA	NA	circbase	NA	NA	NA	NA	NA	NA	NA	NA	NA	NA	NA	hsa_circ_0033675	chr14	106331169	106331899	-	730	730	---	---
hsa_circ_0023729	3.85615	P	2.35197	A	2.83663	2.83663	up	circRNA	CTACACGAGGATATTGCAGTTTTGGTACTTATTTTCAATGCTGCTAAAACCTGTCCAACA	NA	circbase	NA	NA	NA	NA	NA	NA	NA	NA	NA	NA	NA	hsa_circ_0023729	chr11	77612466	77632519	-	20053	598	NM_033547	INTS4
hsa_circ_0090484	3.50474	P	1.84079	A	3.16882	3.16882	up	circRNA	TTGGATACCTCACCTTCTACAGCATCCGAGCCTATGAGCAGCTGGGACAGAGGGCATTCG	NA	circbase	NA	NA	NA	NA	NA	NA	NA	NA	NA	NA	NA	hsa_circ_0090484	chrX	48319371	48324709	-	5338	633	NM_033518	SLC38A5
hsa_circ_0026386	4.15395	P	5.31147	P	0.448282	2.23074	down	circRNA	ATGTGTCTATTAAATGCATGTGTCACCTGTGTTCCAGCTTGCAAACGGCCATTGCTGATG	NA	circbase	NA	NA	NA	NA	NA	NA	NA	NA	NA	NA	NA	hsa_circ_0026386	chr12	52817853	52822260	-	4407	942	NM_004693	KRT75
hsa_circ_0075482	4.06352	P	7.27812	P	0.107723	9.28304	down	circRNA	GATATTTCAGGGGGATGGAGACAGAAGTCACAAACTCACATGCCACCAGCCATATGATGT	NA	circbase	NA	NA	NA	NA	NA	NA	NA	NA	NA	NA	NA	hsa_circ_0075482	chr6	3002283	3012908	+	10625	4806	NM_000904	NQO2
hsa_circ_0081300	5.86262	P	13.0892	M	0.00667724	149.762	down	circRNA	ATCAAGCAGTGCATTGAGGTTAATGACAACACCAACACAGCGGGGTCCCCTGGGGAGGTG	NA	circbase	NA	NA	NA	NA	NA	NA	NA	NA	NA	NA	NA	hsa_circ_0081300	chr7	98556966	98565321	+	8355	1170	NM_001244580	TRRAP
hsa_circ_0032863	3.65619	P	5.22433	P	0.337243	2.96522	down	circRNA	AATGTTGCTACAGGTGGGAGGTGTTGCTGTTTTTCTCCTGATGGTAAAGCTTTAGCCGTA	NA	circbase	NA	NA	NA	NA	NA	NA	NA	NA	NA	NA	NA	hsa_circ_0032863	chr14	89109236	89131833	-	22597	1113	NM_183387	EML5
hsa_circ_0074586	4.6025	P	5.72859	P	0.458156	2.18266	down	circRNA	TGTCAGGGATGCATTTGTGGCCATTGTCTTCCAGGAGTTCATCAAGATGACCAACTATGA	NA	circbase	NA	NA	NA	NA	NA	NA	NA	NA	NA	NA	NA	hsa_circ_0074586	chr5	150488015	150488111	-	96	96	NM_001155	ANXA6
hsa_circ_0000375	2.32825	A	3.47026	P	0.453127	2.20689	down	circRNA	AGGATTTCTCAGGCTATGCCATGGCAGCTGCAGAGGCCCAGGGAGAGGTCCCATCCATGG	NA	circbase	NA	NA	NA	NA	NA	NA	NA	NA	NA	NA	NA	hsa_circ_0000375	chr12	6657590	6657991	-	401	279	NM_080730	IFFO1
hsa_circ_0056968	7.74577	P	6.29281	P	2.73768	2.73768	up	circRNA	TAATAAAATATATACTATATGAAAAGAGCAAGCTCCACCTCGTCCGTGGCCCTGCCCACC	NA	circbase	NA	NA	NA	NA	NA	NA	NA	NA	NA	NA	NA	hsa_circ_0056968	chr2	170655321	170668571	+	13250	1706	NM_003142	SSB
hsa_circ_0067561	2.7547	A	5.35305	P	0.165127	6.05593	down	circRNA	GTGATGAGTAAACTGAGGCTTCGTGATTCAAGTGCTTTGGGGAAGACGTATGCATCAGTA	NA	circbase	NA	NA	NA	NA	NA	NA	NA	NA	NA	NA	NA	hsa_circ_0067561	chr3	140277481	140286919	+	9438	2869	NM_022131	CLSTN2
hsa_circ_0019564	3.42085	P	1.16113	A	4.78901	4.78901	up	circRNA	GCACCAATAAAGATTTCTAATGATGCACAGACATTTAGGGGTGGACCCCAGAGGTTTGAG	NA	circbase	NA	NA	NA	NA	NA	NA	NA	NA	NA	NA	NA	hsa_circ_0019564	chr10	102824257	102825351	+	1094	917	NM_030929	KAZALD1
hsa_circ_0013833	3.97078	P	5.99211	P	0.24633	4.05959	down	circRNA	TTTATGGCAATTCCAAGAAGGGGCTGAAAGTTGCTGCTGATGCTAGAAGGACTAGTAGAT	NA	circbase	NA	NA	NA	NA	NA	NA	NA	NA	NA	NA	NA	hsa_circ_0013833	chr1	144863317	144904737	-	41420	3511	NM_014644	PDE4DIP
hsa_circ_0043409	4.30842	P	3.25621	A	2.0737	2.0737	up	circRNA	TTTGAACTTGCAGACTTGCTTGTGAGGGATGTCCACTGTTGGAGCAGTTGAACATTTCCT	NA	circbase	NA	NA	NA	NA	NA	NA	NA	NA	NA	NA	NA	hsa_circ_0043409	chr17	37437641	37439108	-	1467	202	NM_032875	FBXL20
hsa_circ_0079446	4.78415	P	2.7313	A	4.14924	4.14924	up	circRNA	AACAGTGATGGTCCATGGGGCCGATGTATGGGAGATGAATGTGGTCCCGGAGGCATCCAA	NA	circbase	NA	NA	NA	NA	NA	NA	NA	NA	NA	NA	NA	hsa_circ_0079446	chr7	11581045	11676588	-	95543	1632	NM_015204	THSD7A
hsa_circ_0080192	6.89995	P	1.11729	A	55.0496	55.0496	up	circRNA	TGTAGCAGGGAAGGAGTCTATATGCTCAAGGCTGTTATTTATAACGAGTTTCATGGAACC	NA	circbase	NA	NA	NA	NA	NA	NA	NA	NA	NA	NA	NA	hsa_circ_0080192	chr7	47842807	47947847	-	105040	6734	NM_138295	PKD1L1
hsa_circ_0049890	1.49153	A	3.68598	P	0.218478	4.57713	down	circRNA	ACACCCTGGAGGAAGCCAAAGAGGTTGCCCAGGGCAACCGCTCCTTCAGGCGTGAATGTG	NA	circbase	NA	NA	NA	NA	NA	NA	NA	NA	NA	NA	NA	hsa_circ_0049890	chr19	16607204	16625474	+	18270	1975	NM_032207	C19orf44
hsa_circ_0017507	6.11883	P	7.83422	P	0.30452	3.28386	down	circRNA	GTCCTGACAGGAAAGGATTTGAAGATGATCGAATTGAGGCTTTACTTCATAAAATTGAAA	NA	circbase	NA	NA	NA	NA	NA	NA	NA	NA	NA	NA	NA	hsa_circ_0017507	chr10	3193438	3199723	-	6285	488	NM_001242307	PITRM1
hsa_circ_0054180	2.35505	A	3.63141	P	0.412835	2.42227	down	circRNA	GTGGACCAACTTTATCTGATAATCAGAACACTAGTGTATTCACAGAGATATAAAACCTGA	NA	circbase	NA	NA	NA	NA	NA	NA	NA	NA	NA	NA	NA	hsa_circ_0054180	chr2	39417445	39431758	-	14313	289	NM_001009565	CDKL4
hsa_circ_0029924	1.63164	A	5.7376	P	0.0580738	17.2195	down	circRNA	TTTACCCTGGCGAGAGTGTTCACTGGAGAGAAGCTCTGAATATCTTGAAGCTGGTAGTTT	NA	circbase	NA	NA	NA	NA	NA	NA	NA	NA	NA	NA	NA	hsa_circ_0029924	chr13	32821459	32839753	+	18294	1118	NM_023037	FRY
hsa_circ_0054781	4.58848	P	5.79168	P	0.434312	2.30249	down	circRNA	GACAGCAAAGGAATTTTTGAGAGATATCTTCAATCTCCTGTTTTTGTTGCCAAGTCTAAA	NA	circbase	NA	NA	NA	NA	NA	NA	NA	NA	NA	NA	NA	hsa_circ_0054781	chr2	61463295	61493302	-	30007	1485	NM_014709	USP34
hsa_circ_0080794	2.23151	A	3.72585	P	0.354945	2.81734	down	circRNA	TTCTCTCTGCGTCTGATGGAGGGTAACTGACGATGCCCTGGTGTACAGCACCTTCCTGCT	NA	circbase	NA	NA	NA	NA	NA	NA	NA	NA	NA	NA	NA	hsa_circ_0080794	chr7	76058831	76062347	+	3516	223	NM_007155	ZP3
hsa_circ_0047025	3.82863	P	2.71815	A	2.15916	2.15916	up	circRNA	AAATCGATCACAACCAGGCATTAAGTTCACAGTGTGCGTTAGAGTCCTTTGGTTCAGCAG	NA	circbase	NA	NA	NA	NA	NA	NA	NA	NA	NA	NA	NA	hsa_circ_0047025	chr18	13052917	13073184	+	20267	2599	NM_032142	CEP192
hsa_circ_0011078	13.3152	P	6.34702	P	125.205	125.205	up	circRNA	GTGTGGCTGGGTGCCTACTCCCTGTCCATCCGGGACTGGGATCAGACCAGAGGCGATCAT	NA	circbase	NA	NA	NA	NA	NA	NA	NA	NA	NA	NA	NA	hsa_circ_0011078	chr1	27942199	27943517	-	1318	306	NM_001042747	FGR
hsa_circ_0068681	7.16868	P	11.8882	M	0.0379574	26.3453	down	circRNA	ACATTTCACAGCTTCTTCTCAGCCTGTTGATAACCATGTTAGCCCATCTTCCTTCTTGGG	NA	circbase	NA	NA	NA	NA	NA	NA	NA	NA	NA	NA	NA	hsa_circ_0068681	chr3	196778447	196846401	-	67954	1410	NM_004087	DLG1
hsa_circ_0083986	7.2422	P	1.79525	A	43.621	43.621	up	circRNA	CATTAAGAAGGTAGGCTTTGGAAAGCAAGTAGATAGCCCTTCAGCTACTGCAGATGCAGA	NA	circbase	NA	NA	NA	NA	NA	NA	NA	NA	NA	NA	NA	hsa_circ_0083986	chr8	38146004	38173062	-	27058	1515	NM_023034	WHSC1L1
hsa_circ_0054623	1.10911	A	4.23172	P	0.114816	8.70962	down	circRNA	CCAAGATAAGAAGGCTTAGGCAGGAATTTAATCCTAAATTGGAGAGTCAGAGAGTAAATA	NA	circbase	NA	NA	NA	NA	NA	NA	NA	NA	NA	NA	NA	hsa_circ_0054623	chr2	55582714	55616022	-	33308	636	NM_001135597	CCDC88A
hsa_circ_0073403	4.47111	P	3.46715	P	2.00551	2.00551	up	circRNA	CAAAAATACAGCGTTTGGGTGAATGCCATCTTATGATGGCAAAAGCAGCTCTAGTTGATT	NA	circbase	NA	NA	NA	NA	NA	NA	NA	NA	NA	NA	NA	hsa_circ_0073403	chr5	94799598	94856522	-	56924	3396	NM_014639	TTC37
hsa_circ_0074588	2.33041	A	6.84523	P	0.0437425	22.861	down	circRNA	GTGGCCATTGACTATCACAAGTCCCTGGAGGATGCTCTGAGCTCAGACACATCTGGCCAC	NA	circbase	NA	NA	NA	NA	NA	NA	NA	NA	NA	NA	NA	hsa_circ_0074588	chr5	150488015	150497398	-	9383	342	NM_001155	ANXA6
hsa_circ_0084660	3.68201	P	1.378	A	4.93829	4.93829	up	circRNA	TCGTTTCCAGAATCTGCAAAATGGCTGATAATTTGGATGAATTTATTGAAGAGCAAAAAG	NA	circbase	NA	NA	NA	NA	NA	NA	NA	NA	NA	NA	NA	hsa_circ_0084660	chr8	67986477	68066371	+	79894	2128	NM_024790	CSPP1
hsa_circ_0047245	2.40574	A	3.54494	P	0.454009	2.2026	down	circRNA	ATTCAAGCTTCCTCAGGAGCTGCTGAAACCCAGAACTGTCAGCACAACACCGCGGGAGAG	NA	circbase	NA	NA	NA	NA	NA	NA	NA	NA	NA	NA	NA	hsa_circ_0047245	chr18	21461899	21519350	+	57451	3914	NM_198129	LAMA3
hsa_circ_0026570	3.53829	P	2.05581	A	2.79427	2.79427	up	circRNA	AGAGACACCGATGTGGAAACTAAAGCCCAGAGAGAAAGTCTGACTTGCCCCACAGCCAGT	NA	circbase	NA	NA	NA	NA	NA	NA	NA	NA	NA	NA	NA	hsa_circ_0026570	chr12	53586474	53594978	-	8504	2072	NM_000889	ITGB7
hsa_circ_0013884	10.2907	P	7.03077	P	9.5792	9.5792	up	circRNA	AAGTTCATGCCACCACCGACTTATACTGAGATCTATGTTAGCGTTCCTGGATCCAAGAAG	NA	circbase	NA	NA	NA	NA	NA	NA	NA	NA	NA	NA	NA	hsa_circ_0013884	chr1	145440631	145441053	+	422	309	NM_006472	TXNIP
hsa_circ_0025681	2.2226	A	3.65232	P	0.371204	2.69393	down	circRNA	ATGAAAGGAGGTGAATGCTGTCAATTGCAACACCAGCTGGAAAATCACTTTATTCATGAA	NA	circbase	NA	NA	NA	NA	NA	NA	NA	NA	NA	NA	NA	hsa_circ_0025681	chr12	26834806	26868768	-	33962	785	NM_002223	ITPR2
hsa_circ_0069142	3.75762	P	2.68664	A	2.10087	2.10087	up	circRNA	ACTGGAGAAGATTATGATTCCGATGCGATGAGCAGCTCTTATGAGTCGTATGATGAAGAG	NA	circbase	NA	NA	NA	NA	NA	NA	NA	NA	NA	NA	NA	hsa_circ_0069142	chr4	7820802	7845077	-	24275	488	NM_001134647	AFAP1
hsa_circ_0092235	1.12393	A	5.15484	P	0.0611752	16.3465	down	circRNA	AGTGTAAAAGACTTCATCACCTGATTCTTCCAATGAGAATTCCGTAGCAACTCCTCCTCC	NA	circbase	NA	NA	NA	NA	NA	NA	NA	NA	NA	NA	NA	hsa_circ_0092235	chrY	14832521	14834120	+	1599	229	NM_004654	USP9Y
hsa_circ_0021588	3.88033	P	2.81439	A	2.09354	2.09354	up	circRNA	CATTTAGCACAGAAATCTGGGCCCGATTTCTAGCATTTGAAAGTAATATTGGTGATCTAG	NA	circbase	NA	NA	NA	NA	NA	NA	NA	NA	NA	NA	NA	hsa_circ_0021588	chr11	33108533	33112273	-	3740	350	NM_001326	CSTF3
hsa_circ_0002296	6.79634	P	4.78429	P	4.03354	4.03354	up	circRNA	AGGAAACCAGTTCCTGGCACAGAGTGAGGAGAAGCCACATGTGGTTGCTCACTTCCATGA	NA	circbase	NA	NA	NA	NA	NA	NA	NA	NA	NA	NA	NA	hsa_circ_0002296	chr19	49488717	49489292	-	575	331	NM_002103	GYS1
hsa_circ_0090517	4.56862	P	2.90237	A	3.1739	3.1739	up	circRNA	GTCTCTGGAGCCTAGAATATATTGATCTGATGGAAACAACCCAGTACATGAATGAGGGAG	NA	circbase	NA	NA	NA	NA	NA	NA	NA	NA	NA	NA	NA	hsa_circ_0090517	chrX	48664774	48673458	+	8684	712	NM_006044	HDAC6
hsa_circ_0046730	6.40722	P	5.35449	P	2.07445	2.07445	up	circRNA	GAATCAGACAACATAACAGCACAACCAAAATTGATTGTTCATTGTAAGCTTCAAGTGGAA	NA	circbase	NA	NA	NA	NA	NA	NA	NA	NA	NA	NA	NA	hsa_circ_0046730	chr18	2718155	2728594	+	10439	653	NM_015295	SMCHD1
hsa_circ_0032517	7.75215	P	5.99204	P	3.38725	3.38725	up	circRNA	ACACTCCAGACTTTACTCCAAGAAACTTTTCAGGGTGCTTGAATGCCTCCTGAACCTGAT	NA	circbase	NA	NA	NA	NA	NA	NA	NA	NA	NA	NA	NA	hsa_circ_0032517	chr14	73961931	73965844	-	3913	499	NM_001220484	HEATR4
hsa_circ_0042782	6.82603	P	8.00749	P	0.440905	2.26806	down	circRNA	AATGGGCATTACATCATCCCACAGATGGCTGACAGACCCTGGCTGGGCATCCATCAGCAG	NA	circbase	NA	NA	NA	NA	NA	NA	NA	NA	NA	NA	NA	hsa_circ_0042782	chr17	27908355	27910634	-	2279	709	NM_001085454	GIT1
hsa_circ_0019880	5.20116	P	4.018	P	2.27074	2.27074	up	circRNA	TCTGTATCAGGTGTATTTTTGTACAATGGACATCCAATAAAACAGGTAGATGTCTTGGGA	NA	circbase	NA	NA	NA	NA	NA	NA	NA	NA	NA	NA	NA	hsa_circ_0019880	chr10	105664848	105670380	-	5532	162	NM_024928	OBFC1
hsa_circ_0054801	5.74196	P	17.3029	M	0.000330976	3021.36	down	circRNA	ATATTTAATGGAATCCATGCAGGGAAGTTCTGACGAAACTGCCAACAGTGGTGAAGATGG	NA	circbase	NA	NA	NA	NA	NA	NA	NA	NA	NA	NA	NA	hsa_circ_0054801	chr2	61486845	61575615	-	88770	4170	NM_014709	USP34
hsa_circ_0079806	3.77259	P	2.26887	A	2.83574	2.83574	up	circRNA	CTCAAGAATTGTGTGAAAGAAAATGTCTTTATTTAAAGCCCGTGATTGGTGGTCTACTAT	NA	circbase	NA	NA	NA	NA	NA	NA	NA	NA	NA	NA	NA	hsa_circ_0079806	chr7	33185853	33545257	+	359404	2309	NM_198428	BBS9
hsa_circ_0046765	3.85973	P	1.72968	A	4.37734	4.37734	up	circRNA	AGAAAAGGCTGTTTACTGGAGGAAAATGTCTTTGGTCCTCAGTGCAACGAATGTCGAGAG	NA	circbase	NA	NA	NA	NA	NA	NA	NA	NA	NA	NA	NA	hsa_circ_0046765	chr18	6961943	7012137	-	50194	4089	NM_005559	LAMA1
hsa_circ_0000951	1.12524	A	4.48206	P	0.0976105	10.2448	down	circRNA	AAGCTCTCTGTGCATGTGACAGCGTCCCAGGACCTACTGTCAAGATACAGGCTGGAGGTG	NA	circbase	NA	NA	NA	NA	NA	NA	NA	NA	NA	NA	NA	hsa_circ_0000951	chr19	52003173	52003554	-	381	381	NM_053003	SIGLEC12
hsa_circ_0007377	5.72352	P	7.75242	P	0.245042	4.08093	down	circRNA	TCACAGTGAGTTTCTCCAGCATTTGGCTCTAGGTGCCAAGGGCACATGTGACAAGAAGGT	NA	circbase	NA	NA	NA	NA	NA	NA	NA	NA	NA	NA	NA	hsa_circ_0007377	chr12	11180999	11273779	-	92780	92780	NM_176884	TAS2R43
hsa_circ_0079832	2.07294	A	3.62907	P	0.340062	2.94064	down	circRNA	AGCTAAACAACAGACACATGTAAGGTTATTCAAGGATGTTTTTGGTTATTTGGAACTGTC	NA	circbase	NA	NA	NA	NA	NA	NA	NA	NA	NA	NA	NA	hsa_circ_0079832	chr7	34985278	34994390	-	9112	305	NM_015283	DPY19L1
hsa_circ_0026477	10.338	P	9.32023	P	2.02478	2.02478	up	circRNA	AGGAGAGCCGGAGATCCGGGAGCTGCAGTCCCAGATCTCGGACACATCTGTGGTGCTGTC	NA	circbase	NA	NA	NA	NA	NA	NA	NA	NA	NA	NA	NA	hsa_circ_0026477	chr12	53292462	53293849	-	1387	512	NM_002273	KRT8
hsa_circ_0006545	5.02649	P	3.96468	P	2.08756	2.08756	up	circRNA	GCTTGTGTGGGAATAGCTATTCAGTCAGACAGAACCACTTATCACGTTTTGCAGTATCTC	NA	circbase	NA	NA	NA	NA	NA	NA	NA	NA	NA	NA	NA	hsa_circ_0006545	chr10	126628942	126631876	+	2934	2934	NM_017580	ZRANB1
hsa_circ_0074589	2.68807	A	4.42896	P	0.299185	3.34241	down	circRNA	GTGGCCATTGGACCTATACGAGGCAGGGGAACTGAAATGGGGAACAGATGAAGCCCAGTT	NA	circbase	NA	NA	NA	NA	NA	NA	NA	NA	NA	NA	NA	hsa_circ_0074589	chr5	150488015	150512748	-	24733	1234	NM_001155	ANXA6
hsa_circ_0070778	4.96035	P	3.86064	P	2.14312	2.14312	up	circRNA	TATGCTTCAGGAAAATATGTTGGAGAGGATTCATTTTCACATAGTGCCAAGCAGAGATGC	NA	circbase	NA	NA	NA	NA	NA	NA	NA	NA	NA	NA	NA	hsa_circ_0070778	chr4	120177400	120193189	+	15789	1802	NM_019050	USP53
hsa_circ_0088326	4.25742	P	7.04941	P	0.144387	6.92582	down	circRNA	CCGACTCAAGCTAAAACAGAAGACCATAGAATTAACACGAGCATGTCAGAAGCAATATGA	NA	circbase	NA	NA	NA	NA	NA	NA	NA	NA	NA	NA	NA	hsa_circ_0088326	chr9	123874736	123936015	+	61279	5745	NM_007018	CNTRL
hsa_circ_0062298	2.61312	A	12.3228	M	0.00119421	837.371	down	circRNA	TACTTCGTGGAGGAGGGACAGCGAAGCTGAGCCCTGAGGAGCTGGCAGAGCTGAAGACCT	NA	circbase	NA	NA	NA	NA	NA	NA	NA	NA	NA	NA	NA	hsa_circ_0062298	chr22	20102283	20102399	-	116	116	NM_022727	TRMT2A
hsa_circ_0057992	1.35639	A	3.81446	P	0.18199	5.4948	down	circRNA	CTCCTTTCAGCTGAATTTTATTCTGTTTCTGAATACGGTTAGAGTTCTAGCTACCAAAAT	NA	circbase	NA	NA	NA	NA	NA	NA	NA	NA	NA	NA	NA	hsa_circ_0057992	chr2	209345794	209353875	+	8081	234	NM_005048	PTH2R
hsa_circ_0049089	4.82707	P	2.52857	A	4.91947	4.91947	up	circRNA	CTTGTGGATGGTCACCACACTCTACAAAGGCAGTCAACTACATGACACATTCCGCTTCTG	NA	circbase	NA	NA	NA	NA	NA	NA	NA	NA	NA	NA	NA	hsa_circ_0049089	chr19	8966649	8973616	-	6967	604	NM_024690	MUC16
hsa_circ_0086581	3.55364	P	2.31132	A	2.36578	2.36578	up	circRNA	AACAATAAATCCTTTGTGACCTTTGTCGTAGAGATGGATTCCTGGAAATACCTCCTCAAG	NA	circbase	NA	NA	NA	NA	NA	NA	NA	NA	NA	NA	NA	hsa_circ_0086581	chr9	21454266	21455943	-	1677	1677	NR_027054	MIR31HG
hsa_circ_0081805	4.23768	P	3.12476	A	2.16282	2.16282	up	circRNA	GTTTGTCTTATATTTCCCTGATTACAGCATAGAGACATCATTTCAGCTTTCCATCCATTT	NA	circbase	NA	NA	NA	NA	NA	NA	NA	NA	NA	NA	NA	hsa_circ_0081805	chr7	103835590	103844682	-	9092	481	NM_002553	ORC5
hsa_circ_0057226	1.73712	A	7.80681	P	0.0148882	67.1672	down	circRNA	ACAGTCACCCCTGTCAAGATCATTAAAAAGCCAAAGGATGTGACAGCCTTGGAAAATGCC	NA	circbase	NA	NA	NA	NA	NA	NA	NA	NA	NA	NA	NA	hsa_circ_0057226	chr2	179634405	179635047	-	642	522	NM_133378	TTN
hsa_circ_0084841	6.59245	P	1.95826	A	24.833	24.833	up	circRNA	GACTGAGGAGAACAAAGATGAATATATTGGAGAATGGTTTTTCTTGCTTTCACATGAAGT	NA	circbase	NA	NA	NA	NA	NA	NA	NA	NA	NA	NA	NA	hsa_circ_0084841	chr8	87454847	87460742	+	5895	435	NM_007013	WWP1
hsa_circ_0066562	3.41014	P	2.22634	A	2.27175	2.27175	up	circRNA	CCGACAGGAGATGCCCATGGAAACCCTGTGTCACCTGAGGACCAAGTCAGCCTCGCTCAG	NA	circbase	NA	NA	NA	NA	NA	NA	NA	NA	NA	NA	NA	hsa_circ_0066562	chr3	78676470	78701079	-	24609	1261	NM_002941	ROBO1
hsa_circ_0065322	3.25679	P	1.88778	A	2.58295	2.58295	up	circRNA	TTAAAATAAAGTTCTATTTATCCCTTGTGACCATACCCTGTGGAGAGTTCATGGATCGCC	NA	circbase	NA	NA	NA	NA	NA	NA	NA	NA	NA	NA	NA	hsa_circ_0065322	chr3	47887654	47891686	+	4032	2569	NM_014966	DHX30
hsa_circ_0041393	8.12757	P	5.67759	P	5.4641	5.4641	up	circRNA	AGTGTATACGGGTAGTGACTTCTTTGATAGTTTGCTTCAGAAGCTGCAGGTTACTTACAA	NA	circbase	NA	NA	NA	NA	NA	NA	NA	NA	NA	NA	NA	hsa_circ_0041393	chr17	2195845	2200647	-	4802	297	NM_001170957	SMG6
hsa_circ_0035668	3.38342	P	5.86794	P	0.178685	5.59645	down	circRNA	TGCCACCGCAGAAGTGGGTTACAATAGGGACAGGAACTTGAAACTGGTATTGTTGACCTT	NA	circbase	NA	NA	NA	NA	NA	NA	NA	NA	NA	NA	NA	hsa_circ_0035668	chr15	63915013	63915090	-	77	77	NM_003922	HERC1
hsa_circ_0060221	8.80831	P	7.74768	P	2.08584	2.08584	up	circRNA	GCTAGACGTGAAACTGAAGGCTGAAGATTTTATAGTGGATATAACATTTTTCTGGAGATT	NA	circbase	NA	NA	NA	NA	NA	NA	NA	NA	NA	NA	NA	hsa_circ_0060221	chr20	35532559	35533906	-	1347	233	NM_015474	SAMHD1
hsa_circ_0040715	3.81257	P	2.80899	A	2.00497	2.00497	up	circRNA	ATGGTGTCAAAAGTGAAAGATAGTTTGGGCCACCACCAACAAGATCGGTTGTGCTGTGAA	NA	circbase	NA	NA	NA	NA	NA	NA	NA	NA	NA	NA	NA	hsa_circ_0040715	chr16	84884173	84907569	+	23396	664	NM_031476	CRISPLD2
hsa_circ_0072980	4.53172	P	3.45801	A	2.10484	2.10484	up	circRNA	GAAAATGGAGGTATCATCAAATGGTATTCAGTCCACTCCTCTGAATCTTGCAACATACTG	NA	circbase	NA	NA	NA	NA	NA	NA	NA	NA	NA	NA	NA	hsa_circ_0072980	chr5	72377609	72378652	+	1043	265	NM_138782	FCHO2
hsa_circ_0046678	8.8034	P	7.78375	P	2.02742	2.02742	up	circRNA	ATATTTACCTGAATCACATCGAGCCACTGAAAATTCAGCCAGGTGACTTTATACACACTT	NA	circbase	NA	NA	NA	NA	NA	NA	NA	NA	NA	NA	NA	hsa_circ_0046678	chr18	671379	671451	+	72	72	NM_001071	TYMS
hsa_circ_0072962	3.66164	P	2.56553	A	2.13776	2.13776	up	circRNA	CCAACAGTAGGGAATGTCCTGATGCAGATTCATTGAACATTCCTGATGTAGATGAAGAAG	NA	circbase	NA	NA	NA	NA	NA	NA	NA	NA	NA	NA	NA	hsa_circ_0072962	chr5	72337117	72364606	+	27489	665	NM_138782	FCHO2
hsa_circ_0074882	8.66407	P	7.38306	P	2.43009	2.43009	up	circRNA	CTAGAATCAGGAATCTAAGAAGAGGTTTGATACTGAGGAGGAATTTAAGAAGCGAGCATA	NA	circbase	NA	NA	NA	NA	NA	NA	NA	NA	NA	NA	NA	hsa_circ_0074882	chr5	167927595	167943955	+	16360	803	NM_002887	RARS
hsa_circ_0011211	3.37905	A	4.55108	P	0.443795	2.25329	down	circRNA	ATCAGCCTGAGCCTACTGATCGGCGTAGTCAAGCTGACCTGATCTCCAGCTTCCTGCTCA	NA	circbase	NA	NA	NA	NA	NA	NA	NA	NA	NA	NA	NA	hsa_circ_0011211	chr1	31214486	31214563	-	77	77	NM_006762	LAPTM5
hsa_circ_0033051	4.87674	P	2.07692	A	6.9635	6.9635	up	circRNA	GAAAAAGAAAAAGTGGAAAAAGTTGCTGTAATTTGTAGATTTCTGGATATTCACTCAGTA	NA	circbase	NA	NA	NA	NA	NA	NA	NA	NA	NA	NA	NA	hsa_circ_0033051	chr14	94063704	94084700	+	20996	1197	NM_020818	UNC79
hsa_circ_0046742	7.06406	P	5.93938	P	2.18053	2.18053	up	circRNA	ATTGGAAAAGGTTATAGTTGAAGTCCTGCCTAATCAACCTGTGAAGTTAGTACCTAAAAT	NA	circbase	NA	NA	NA	NA	NA	NA	NA	NA	NA	NA	NA	hsa_circ_0046742	chr18	2762102	2775922	+	13820	932	NM_015295	SMCHD1
hsa_circ_0000122	12.3647	P	9.27508	P	8.51255	8.51255	up	circRNA	TTCTGTGAAGGCTTTTCTTGACCGCCCGAGCCAGCCAACTCAAGAGACAAAGAAAAACTT	NA	circbase	NA	NA	NA	NA	NA	NA	NA	NA	NA	NA	NA	hsa_circ_0000122	chr1	145439832	145440140	+	308	196	NM_006472	TXNIP
hsa_circ_0073364	1.09727	A	6.02896	P	0.0327652	30.5202	down	circRNA	TCAAAAACAGTGCATTTATGACAATAGAGAAAAGCACGGCCTTACAAGAAGGAGATGTTG	NA	circbase	NA	NA	NA	NA	NA	NA	NA	NA	NA	NA	NA	hsa_circ_0073364	chr5	93720072	93727399	-	7327	414	NM_001145678	KIAA0825
hsa_circ_0024008	4.05535	P	2.75155	A	2.46878	2.46878	up	circRNA	CAGGAACAAGCCAGATGCTCGTTTGGCTGCTGAAGAGGAAGCTAAACGATTGGAAGAACT	NA	circbase	NA	NA	NA	NA	NA	NA	NA	NA	NA	NA	NA	hsa_circ_0024008	chr11	93412577	93421031	+	8454	712	NM_033395	KIAA1731
hsa_circ_0082069	6.04719	P	3.68088	P	5.15621	5.15621	up	circRNA	AAGTGGGAGCCACGTCACCAGGTGTCAAGATGCTGCAAGTACATAGGACTGGACTGGGCA	NA	circbase	NA	NA	NA	NA	NA	NA	NA	NA	NA	NA	NA	hsa_circ_0082069	chr7	121732896	121773795	-	40899	1890	NM_005763	AASS
hsa_circ_0005843	3.34664	P	1.18682	A	4.46858	4.46858	up	circRNA	TCCAAATCAGCACAGTTTTTAAAGTATCTAGTGTATATAAGGACAAGCCATTCTCAGTCA	NA	circbase	NA	NA	NA	NA	NA	NA	NA	NA	NA	NA	NA	hsa_circ_0005843	chr2	186946056	186951097	-	5041	3304	TCONS_l2_00015025	TCONS_l2_00015025
hsa_circ_0012793	4.25751	P	5.34964	P	0.469072	2.13187	down	circRNA	GACTGACAAGAGATCTCCCCATCGACCAGCCTTAAATCCATAATGAAAAAGAAAGACTAT	NA	circbase	NA	NA	NA	NA	NA	NA	NA	NA	NA	NA	NA	hsa_circ_0012793	chr1	62713143	62737261	-	24118	983	NM_181712	KANK4
hsa_circ_0053211	6.06038	P	7.34462	P	0.410586	2.43554	down	circRNA	TATATCGATGGGCAGCTCCCCATACCTTGGAGGAGAAGTGTGGGTCCAGGCCCCCACCTG	NA	circbase	NA	NA	NA	NA	NA	NA	NA	NA	NA	NA	NA	hsa_circ_0053211	chr2	27461909	27462339	+	430	332	NM_004341	CAD
hsa_circ_0021311	2.32068	A	3.79203	P	0.360644	2.77282	down	circRNA	CAATGAAAAATAAAGAAAATGAAAGTGTGGGTCATTCTGGCCGGGAATGATTCAAACAGG	NA	circbase	NA	NA	NA	NA	NA	NA	NA	NA	NA	NA	NA	hsa_circ_0021311	chr11	12902551	12966284	+	63733	8331	NM_021961	TEAD1
hsa_circ_0055922	5.28035	P	6.71836	P	0.369076	2.70947	down	circRNA	ATTCAGAACAGAAGTTGCTGAAAAGCCAGGAGTCAAAATGACTGAGCGCTTTGACTGCCA	NA	circbase	NA	NA	NA	NA	NA	NA	NA	NA	NA	NA	NA	hsa_circ_0055922	chr2	105977282	106002997	-	25715	1321	NM_201555	FHL2
hsa_circ_0021544	2.61364	A	4.10344	P	0.356062	2.8085	down	circRNA	GCATCGTTGCAGATTTGTTTACCTACAAAATGCTTCGGTATCCATATTTTTGTAGAATGT	NA	circbase	NA	NA	NA	NA	NA	NA	NA	NA	NA	NA	NA	hsa_circ_0021544	chr11	28134864	28318478	+	183614	795	NM_152636	METTL15
hsa_circ_0024679	5.75156	P	3.89179	P	3.62949	3.62949	up	circRNA	CCTCGTGCCCCAAGAGGGGTAGCTAATCCAGATGGCGACTTCCGACTCACAATCGTCAAT	NA	circbase	NA	NA	NA	NA	NA	NA	NA	NA	NA	NA	NA	hsa_circ_0024679	chr11	121428022	121428114	+	92	92	NM_003105	SORL1
hsa_circ_0055781	3.6994	P	2.213	A	2.80189	2.80189	up	circRNA	TTTAGCTTAGATGATGGATTTGGACATGCTTCTATGAAGAAATGCCACATGGTCCGAGAG	NA	circbase	NA	NA	NA	NA	NA	NA	NA	NA	NA	NA	NA	hsa_circ_0055781	chr2	99135426	99137194	+	1768	316	NM_001134224	INPP4A
hsa_circ_0073598	3.88704	P	8.74967	P	0.0343718	29.0936	down	circRNA	CTTACAGCAGCGAAGAATAGCCAGAATTCAGCAAATCGAAAAGGACATACTTCGTATACG	NA	circbase	NA	NA	NA	NA	NA	NA	NA	NA	NA	NA	NA	hsa_circ_0073598	chr5	112128142	112163703	+	35561	981	NM_001127510	APC
hsa_circ_0040079	4.67435	P	3.60556	A	2.09768	2.09768	up	circRNA	GCCATGAAAGATGAAAACTCTTGGAAGTCAGAAGCTGAAATTGATATGGAACTATTTCAT	NA	circbase	NA	NA	NA	NA	NA	NA	NA	NA	NA	NA	NA	hsa_circ_0040079	chr16	69704138	69718873	+	14735	270	NM_138714	NFAT5
hsa_circ_0020033	3.70349	P	1.55106	A	4.44577	4.44577	up	circRNA	TACAGCTCTACCTAGAGTTCTTATCTTATCAAACAATCTTCTAAAGAAGCTTCCCCATGG	NA	circbase	NA	NA	NA	NA	NA	NA	NA	NA	NA	NA	NA	hsa_circ_0020033	chr10	112769005	112773425	+	4420	2314	NM_007373	SHOC2
hsa_circ_0030427	4.10584	P	2.84626	A	2.39426	2.39426	up	circRNA	AACAGTGCAGGTTCCTGATGTTATTAGCAGCATAAGGCAATTATCTAAAGCGGCCATGAA	NA	circbase	NA	NA	NA	NA	NA	NA	NA	NA	NA	NA	NA	hsa_circ_0030427	chr13	75900332	75936743	-	36411	1535	NM_014832	TBC1D4
hsa_circ_0079194	5.81934	P	9.2587	M	0.0921831	10.848	down	circRNA	GGCCCGGCAGGTGCGGTCGACACCATCTTCTCCCTGCAGGGAGACTCCAGCCTGTTTGTG	NA	circbase	NA	NA	NA	NA	NA	NA	NA	NA	NA	NA	NA	hsa_circ_0079194	chr7	2578812	2583596	-	4784	1340	NM_152743	BRAT1
hsa_circ_0014100	3.0264	A	4.3452	P	0.400869	2.49458	down	circRNA	CAAACAGTGTGGAGGAAAGCAAGGAAGCAATGCAGAATCAGGTGAATGTTAATCCAGAGA	NA	circbase	NA	NA	NA	NA	NA	NA	NA	NA	NA	NA	NA	hsa_circ_0014100	chr1	151070327	151089992	+	19665	576	NM_144618	GABPB2
hsa_circ_0007894	4.75774	P	3.69156	P	2.09389	2.09389	up	circRNA	CGACTTCCAGATGTGGTGCTGGAAAAAGCCATGCACAAGTGCATCTTGAAGCCCCTCAAG	NA	circbase	NA	NA	NA	NA	NA	NA	NA	NA	NA	NA	NA	hsa_circ_0007894	chr20	19970649	19977486	+	6837	602	NM_001242581	RIN2
hsa_circ_0029317	6.80055	P	8.10493	P	0.404895	2.46978	down	circRNA	GGTGGAGCTGGTGCCAGTGACGGGGTGGCCCGTGAGCTGATGACGAGGACTGGCTTTTAA	NA	circbase	NA	NA	NA	NA	NA	NA	NA	NA	NA	NA	NA	hsa_circ_0029317	chr12	124941651	124979914	-	38263	879	NM_006312	NCOR2
hsa_circ_0058753	3.79267	P	1.71914	A	4.20917	4.20917	up	circRNA	TCTACACGCCTCTCGAGTTTTGTCAAGAGTCAGGAAGGAGAAAATGAAGAAGGAAGTGAG	NA	circbase	NA	NA	NA	NA	NA	NA	NA	NA	NA	NA	NA	hsa_circ_0058753	chr2	234098495	234102607	+	4112	238	NM_001017915	INPP5D
hsa_circ_0036587	1.95134	A	3.54902	P	0.330407	3.02657	down	circRNA	GACAATTGAGGAATTTGCAGCAGATTTCTATATTCAGATGAAGTTCAAATTGGTCCAGAA	NA	circbase	NA	NA	NA	NA	NA	NA	NA	NA	NA	NA	NA	hsa_circ_0036587	chr15	83710479	83725297	-	14818	461	NM_025238	BTBD1
hsa_circ_0011228	5.02153	P	7.23874	P	0.215058	4.64992	down	circRNA	TTTATCATCGATGCGTTTAAGGGACAGGAGGACTCACGAATGGCAGTGGAAGATACATCT	NA	circbase	NA	NA	NA	NA	NA	NA	NA	NA	NA	NA	NA	hsa_circ_0011228	chr1	31418192	31426828	-	8636	671	NM_001020658	PUM1
hsa_circ_0009698	4.56586	P	1.12983	A	10.823	10.823	up	circRNA	TTTTATTTTTTATTGTACACAAGAGCTTTTTAAGATTCTGCATAGTATTTTGTTAAATGG	NA	circbase	NA	NA	NA	NA	NA	NA	NA	NA	NA	NA	NA	hsa_circ_0009698	chr1	10192426	10209340	+	16914	779	NM_001105562	UBE4B
hsa_circ_0081804	5.75613	P	4.70483	P	2.0724	2.0724	up	circRNA	CAGACATCTGCTCCCACATGTGTTTGTGAATTGTGTTGAATGCTTTACATTGAGGCTGCT	NA	circbase	NA	NA	NA	NA	NA	NA	NA	NA	NA	NA	NA	hsa_circ_0081804	chr7	103828698	103841406	-	12708	519	NM_002553	ORC5
hsa_circ_0065027	3.94962	P	2.82315	A	2.18324	2.18324	up	circRNA	TACCACTCAGTAATGAAGGTGATGCCATCAAAGTTTTTGTGCGAATTCGTCCTCCTGCAG	NA	circbase	NA	NA	NA	NA	NA	NA	NA	NA	NA	NA	NA	hsa_circ_0065027	chr3	44816745	44816929	+	184	184	NM_020242	KIF15
hsa_circ_0071622	7.19585	P	1.10176	A	68.3132	68.3132	up	circRNA	GTCCTTCAAGAACAACACATCTCCTATAATTCATAGTATCTTGCTGTTGGTAGATAAAGA	NA	circbase	NA	NA	NA	NA	NA	NA	NA	NA	NA	NA	NA	hsa_circ_0071622	chr5	151627	173182	+	21555	2316	NM_052909	PLEKHG4B
hsa_circ_0033401	3.74706	P	1.57776	A	4.49806	4.49806	up	circRNA	CAAAGAAGCAACAATCCCATGAGGTTGGTAGAACAGAGATTCTCATCTCCGTTTTAACTG	NA	circbase	NA	NA	NA	NA	NA	NA	NA	NA	NA	NA	NA	hsa_circ_0033401	chr14	102659799	102676867	+	17068	1941	NM_001242414	WDR20
hsa_circ_0061765	5.05206	P	2.70353	A	5.09305	5.09305	up	circRNA	ATTCTGAGGCACTGTCATTTGCTAAGAGATAAGTTTATGTCCAGGGTGCTGCAGAAGGAC	NA	circbase	NA	NA	NA	NA	NA	NA	NA	NA	NA	NA	NA	hsa_circ_0061765	chr21	40762623	40764446	+	1823	918	NM_004627	WRB
hsa_circ_0084420	6.9949	P	12.2778	M	0.0256863	38.9313	down	circRNA	AAGTCCTTAGGGCCCTGAGTCTGAATCTGAAGACCACCGTGCTTCAGGGGAAGTCAGAAC	NA	circbase	NA	NA	NA	NA	NA	NA	NA	NA	NA	NA	NA	hsa_circ_0084420	chr8	48812932	48846650	-	33718	1867	NM_006904	PRKDC
hsa_circ_0072197	4.04418	P	1.19663	A	7.19775	7.19775	up	circRNA	GTATCTAGATTGTGTGCCATATTTAATTGCTATGGGCACAGACCCAGAACCTGCTATGCG	NA	circbase	NA	NA	NA	NA	NA	NA	NA	NA	NA	NA	NA	hsa_circ_0072197	chr5	37051880	37061120	+	9240	906	NM_015384	NIPBL
hsa_circ_0034316	3.63385	P	2.59693	A	2.05184	2.05184	up	circRNA	GCAAAGCACGAGGAGGAAGGAAGAGACTTGAGCTGTTGTGTAGCTTCTCTTGTTCAAGTG	NA	circbase	NA	NA	NA	NA	NA	NA	NA	NA	NA	NA	NA	hsa_circ_0034316	chr15	31239332	31240674	-	1342	341	NM_017762	MTMR10
hsa_circ_0045178	3.3119	A	4.45621	P	0.452407	2.2104	down	circRNA	AACTGGGACATCACATCCTCAAAGCACACATTTTTAAGGTGATGCTGAACAGGAGCTTGG	NA	circbase	NA	NA	NA	NA	NA	NA	NA	NA	NA	NA	NA	hsa_circ_0045178	chr17	61271351	61457187	+	185836	2258	NM_025185	TANC2
hsa_circ_0072702	4.73642	P	3.46557	A	2.41304	2.41304	up	circRNA	TTCCTGTTGAGTGTGTGCGGATTTTAGGCAAACAAGAAAATATTAGAGTGATGCAATTGG	NA	circbase	NA	NA	NA	NA	NA	NA	NA	NA	NA	NA	NA	hsa_circ_0072702	chr5	64875250	64879046	+	3796	372	NM_015342	PPWD1
hsa_circ_0008064	4.858	P	3.10569	A	3.36897	3.36897	up	circRNA	CCAGTAACAAATTATCAACGCCTGATGACTGTGGCAGAAGGCATCACCACACTTTTGTTC	NA	circbase	NA	NA	NA	NA	NA	NA	NA	NA	NA	NA	NA	hsa_circ_0008064	chr12	31595708	31613315	-	17607	1108	NM_144973	DENND5B
hsa_circ_0031549	2.77792	A	3.85747	P	0.473176	2.11338	down	circRNA	TTGACTCCAGATTATTATGACATTAGCAGAGGATTTGCTGTGTTCTGCTGCTCAAAACAG	NA	circbase	NA	NA	NA	NA	NA	NA	NA	NA	NA	NA	NA	hsa_circ_0031549	chr14	31806681	31849784	-	43103	1771	NM_015473	HEATR5A
hsa_circ_0028307	3.70946	P	7.92744	P	0.0537355	18.6097	down	circRNA	GATGCCGATAATTGGCCGCGTAATCCAGGTTGCTGCTGGGAGCAGCAACCTCAAGAGAGT	NA	circbase	NA	NA	NA	NA	NA	NA	NA	NA	NA	NA	NA	hsa_circ_0028307	chr12	112229864	112229967	+	103	103	NM_000690	ALDH2
hsa_circ_0072131	5.81184	P	3.42111	A	5.24425	5.24425	up	circRNA	ATCTCGCAGCCAAGAACAGCCACCATGAATGCATCAGGAAGCTGCTTCAGACTGACCCCC	NA	circbase	NA	NA	NA	NA	NA	NA	NA	NA	NA	NA	NA	hsa_circ_0072131	chr5	34656432	34803881	+	147449	517	NM_015577	RAI14
hsa_circ_0030262	3.40175	P	1.99594	A	2.64967	2.64967	up	circRNA	CTGTCTGTGGAGATGTCGGCTTATTTATAGGAATTGCTTGAAGCCAGAGTCATGGTGGAT	NA	circbase	NA	NA	NA	NA	NA	NA	NA	NA	NA	NA	NA	hsa_circ_0030262	chr13	50123593	50141456	-	17863	1086	NM_018191	RCBTB1
hsa_circ_0012715	5.55073	P	4.48879	P	2.08773	2.08773	up	circRNA	ATGCTGTATTTGGTGATCATCACGGGGGAATTCTACCGGATCTATTACCTGAAGAAGTCG	NA	circbase	NA	NA	NA	NA	NA	NA	NA	NA	NA	NA	NA	hsa_circ_0012715	chr1	56989494	56990226	-	732	336	NM_003713	PPAP2B
hsa_circ_0032970	3.93791	P	2.73723	A	2.29847	2.29847	up	circRNA	ACTCCTTCACATCTGGAAGAACTTGAAGAGTGGAGGGGAGGGGGTAAGTGATAGGGTAGG	NA	circbase	NA	NA	NA	NA	NA	NA	NA	NA	NA	NA	NA	hsa_circ_0032970	chr14	92278655	92302849	-	24194	680	NM_152332	TC2N
hsa_circ_0026749	3.82401	P	4.83542	P	0.496063	2.01587	down	circRNA	AGAGCGTCAGCAAGAATCTCAACAACTCGCAAAGCGACGTGGTTTCCTTTCGGCTCTCCG	NA	circbase	NA	NA	NA	NA	NA	NA	NA	NA	NA	NA	NA	hsa_circ_0026749	chr12	54792380	54795449	-	3069	637	NM_002205	ITGA5
hsa_circ_0024215	4.6344	P	3.38004	A	2.38563	2.38563	up	circRNA	TTGGATTCAGATTACAAATTCAGAAACTCTTGTCCGGTGTTCACGTCTTTTGGTGGGTGT	NA	circbase	NA	NA	NA	NA	NA	NA	NA	NA	NA	NA	NA	hsa_circ_0024215	chr11	108126941	108175579	+	48638	3550	NM_000051	ATM
hsa_circ_0054222	3.78109	P	1.81681	A	3.90216	3.90216	up	circRNA	TAAAATCTCTGTTATAGGGTTTCCCTAGCCAGCAGAGCTTACATCAAGACAGCTGGACTG	NA	circbase	NA	NA	NA	NA	NA	NA	NA	NA	NA	NA	NA	hsa_circ_0054222	chr2	39982434	39988558	-	6124	396	NR_028102	THUMPD2
hsa_circ_0071549	5.61676	P	3.65927	P	3.88384	3.88384	up	circRNA	CAATGGATCTGAATCATCTCTTGAAAGATATATTTTTGCCATCATGGATCAGTTTGGAGA	NA	circbase	NA	NA	NA	NA	NA	NA	NA	NA	NA	NA	NA	hsa_circ_0071549	chr4	186111296	186112366	-	1070	1070	NM_020827	KIAA1430
hsa_circ_0064490	1.23318	A	4.21539	P	0.126551	7.90195	down	circRNA	TCCCAGGATTTCCTGGAATGTTGGGGCAGAAAGGATCCAGAGGTGAAAAGGGTGACCTGG	NA	circbase	NA	NA	NA	NA	NA	NA	NA	NA	NA	NA	NA	hsa_circ_0064490	chr3	15515506	15515779	-	273	81	NM_080538	COLQ
hsa_circ_0081421	4.87233	P	6.01771	P	0.452071	2.21204	down	circRNA	CTCTGACCAGTCCGCGGGGACAGTGGCGGCCGGGATGTGGCCGAGCTCTTCTACCGGAAG	NA	circbase	NA	NA	NA	NA	NA	NA	NA	NA	NA	NA	NA	hsa_circ_0081421	chr7	99699502	99701315	+	1813	485	NM_004722	AP4M1
hsa_circ_0087726	3.96184	P	7.12155	P	0.111901	8.9365	down	circRNA	AGAACACTGAGTGCAAAGAGAAGAAATATGATTATGATAATTTGCCCAGGACATCTGTTA	NA	circbase	NA	NA	NA	NA	NA	NA	NA	NA	NA	NA	NA	hsa_circ_0087726	chr9	101585537	101612363	+	26826	2364	NM_024642	GALNT12
hsa_circ_0075800	3.92367	P	2.3831	A	2.9091	2.9091	up	circRNA	TCTTAACTGGAATTCTTGTCACATTAGCAGCTAGAGCGGGAGCTGTGATACACAAGTTGG	NA	circbase	NA	NA	NA	NA	NA	NA	NA	NA	NA	NA	NA	hsa_circ_0075800	chr6	20113106	20124831	-	11725	495	NM_001080480	MBOAT1
hsa_circ_0054763	3.20065	A	7.79547	P	0.0413829	24.1646	down	circRNA	TGCAAAAATGGGTGAAGAAGAGTTGAAACATTGTAGTCGGTATATACATGACTTATTTCC	NA	circbase	NA	NA	NA	NA	NA	NA	NA	NA	NA	NA	NA	hsa_circ_0054763	chr2	61455961	61577828	-	121867	6117	NM_014709	USP34
hsa_circ_0067450	1.78863	A	5.84322	P	0.0601793	16.617	down	circRNA	AGGAGGATTTCATCCCTCTACTTCAGATTCAAAATAAACCAGAAAAGAAACCTGGAACAC	NA	circbase	NA	NA	NA	NA	NA	NA	NA	NA	NA	NA	NA	hsa_circ_0067450	chr3	135745673	135768203	+	22530	474	NM_002718	PPP2R3A
hsa_circ_0072641	4.19362	P	3.17652	A	2.02385	2.02385	up	circRNA	AACACTTATTCATCTTGTTCAGGTATAAGCCATTGCGACGCAGGGTGATTTGGCTCATCG	NA	circbase	NA	NA	NA	NA	NA	NA	NA	NA	NA	NA	NA	hsa_circ_0072641	chr5	61789824	61811328	+	21504	433	NM_001134779	IPO11
hsa_circ_0057265	5.26047	P	7.41035	P	0.225331	4.43791	down	circRNA	CTGCACTGTTTAAAAGATTATCATAAATGAGGTCATTATCAGAACTACTAGGCCCATATG	NA	circbase	NA	NA	NA	NA	NA	NA	NA	NA	NA	NA	NA	hsa_circ_0057265	chr2	183806797	183817230	-	10433	192	NM_205842	NCKAP1
hsa_circ_0035580	4.78618	P	3.05441	A	3.32135	3.32135	up	circRNA	AGAAGATCTGGGTTTTTCAGAGGGCACTGCTTCTACTTTTGACTACTCTTTAAAGGACAG	NA	circbase	NA	NA	NA	NA	NA	NA	NA	NA	NA	NA	NA	hsa_circ_0035580	chr15	62202375	62212530	-	10155	1632	NM_001018088	VPS13C
hsa_circ_0047035	3.4617	P	4.70193	P	0.423303	2.36237	down	circRNA	AAGGTCAGATGGCCCTGTTACATAAACCAGAGATGATAAAACAGATACTTCCAGAACATA	NA	circbase	NA	NA	NA	NA	NA	NA	NA	NA	NA	NA	NA	hsa_circ_0047035	chr18	13089454	13115875	+	26421	2921	NM_032142	CEP192
hsa_circ_0059247	3.36533	P	2.35016	A	2.02113	2.02113	up	circRNA	TCATGGTTACCAACCTGAAGGAGAGAAAGGAGATGAGACACCAATTATTGCGGTGATGGT	NA	circbase	NA	NA	NA	NA	NA	NA	NA	NA	NA	NA	NA	hsa_circ_0059247	chr20	2967410	2998559	+	31149	599	NM_002836	PTPRA
hsa_circ_0040233	3.71338	P	2.3089	A	2.64723	2.64723	up	circRNA	TCAACGTGCCCTGGAGTGAATTCTTCAAGAGGACAGGTGTTCGGAGCAGCAGCTTCTGGC	NA	circbase	NA	NA	NA	NA	NA	NA	NA	NA	NA	NA	NA	hsa_circ_0040233	chr16	70504873	70506508	+	1635	338	NM_145059	FUK
hsa_circ_0012925	3.76684	P	2.4743	A	2.44959	2.44959	up	circRNA	ATATTGATTATCTTCCCTATTCATTGGGGAACCTTCATTTGAAATTTTTGGCATTAGAAG	NA	circbase	NA	NA	NA	NA	NA	NA	NA	NA	NA	NA	NA	hsa_circ_0012925	chr1	70610484	70639392	-	28908	1830	NM_017768	LRRC40
hsa_circ_0066754	1.22024	A	4.68801	P	0.090385	11.0638	down	circRNA	GGAGTTGTTCAAGGAAATATTTGAGTCAATCTTCTGAAGATGAGTTAAAAATGCCTTGTC	NA	circbase	NA	NA	NA	NA	NA	NA	NA	NA	NA	NA	NA	hsa_circ_0066754	chr3	108288235	108300358	-	12123	661	NM_020890	KIAA1524
hsa_circ_0025823	3.58111	P	2.45129	A	2.18832	2.18832	up	circRNA	CCAGTAACAAGCTAATTTGTGTTTTGTGGACATTGACAACCATTTTATTGAGTTGCCTGA	NA	circbase	NA	NA	NA	NA	NA	NA	NA	NA	NA	NA	NA	hsa_circ_0025823	chr12	31595708	31605410	-	9702	920	NM_144973	DENND5B
hsa_circ_0078095	3.29387	A	5.14615	P	0.276954	3.61071	down	circRNA	AAAGGTGTCTCAACATATCAAAAGTGCCAAAAGGGCAAAAGAGGATGTGTTGCAGAAGGA	NA	circbase	NA	NA	NA	NA	NA	NA	NA	NA	NA	NA	NA	hsa_circ_0078095	chr6	144803344	144835956	+	32612	1737	NM_007124	UTRN
hsa_circ_0032093	4.61371	P	7.26725	P	0.15893	6.29209	down	circRNA	ATTGGCCCCCAAGATGTAATGTCTGTGGCTAAGGATGAAGAACCAGAGAGTATGGATTTC	NA	circbase	NA	NA	NA	NA	NA	NA	NA	NA	NA	NA	NA	hsa_circ_0032093	chr14	58955338	58955592	+	254	254	NM_001244189	KIAA0586
hsa_circ_0041981	12.5151	M	8.08222	P	21.5982	21.5982	up	circRNA	TTCATCACAGGTGCAGGAGTTTGAGCACATCAATGGGCGTTGGTCAATGCCGGAACTGAT	NA	circbase	NA	NA	NA	NA	NA	NA	NA	NA	NA	NA	NA	hsa_circ_0041981	chr17	7810186	7814291	+	4105	1378	NM_001005271	CHD3
hsa_circ_0000997	3.75452	P	2.53183	A	2.33383	2.33383	up	circRNA	TTGTTTACTGATTCTGGCAATTAACCGTGGAGAAAATTTGAAGGTACTGACGGTTAAGGT	NA	circbase	NA	NA	NA	NA	NA	NA	NA	NA	NA	NA	NA	hsa_circ_0000997	chr2	45773870	45789895	-	16025	569	NM_018079	SRBD1
hsa_circ_0053589	4.09222	P	3.06969	A	2.03148	2.03148	up	circRNA	ATCAAAAGCTGATGGCACAGGTCTTAGATTATGTCCATTTTTGGAGGATCATAAAGAAGA	NA	circbase	NA	NA	NA	NA	NA	NA	NA	NA	NA	NA	NA	hsa_circ_0053589	chr2	32661120	32740837	+	79717	7850	NM_016252	BIRC6
hsa_circ_0047699	1.0891	A	4.02186	P	0.130964	7.63571	down	circRNA	ACTTACAGAGGCACTCTTAAAAGACCCATTTTACATGGGCTTGTACCAGAAACGAGATCG	NA	circbase	NA	NA	NA	NA	NA	NA	NA	NA	NA	NA	NA	hsa_circ_0047699	chr18	48444479	48452268	+	7789	684	NM_002396	ME2
hsa_circ_0044902	3.99967	P	2.73982	A	2.39471	2.39471	up	circRNA	CACCTGTCAGGTTTTTCAAGTACGAAAAGTAACAGGAGCAAATACTGGGAAAATATTTGC	NA	circbase	NA	NA	NA	NA	NA	NA	NA	NA	NA	NA	NA	hsa_circ_0044902	chr17	57991995	58022879	+	30884	1028	NM_003161	RPS6KB1
hsa_circ_0072787	2.68537	A	3.97432	P	0.40925	2.44349	down	circRNA	GGTGACTGGAATGAGAAAACAACTTACGGCCAAGGAAAAAAGGAATGTCTTTAAAATCAG	NA	circbase	NA	NA	NA	NA	NA	NA	NA	NA	NA	NA	NA	hsa_circ_0072787	chr5	68687657	68689327	+	1670	416	NM_002873	RAD17
hsa_circ_0049953	4.23631	P	1.60698	A	6.18737	6.18737	up	circRNA	CTGCAGACAGCAGAGCAAAGCTCAGAAGAAGAAGCGGAAGCAGGAGCGTGCTGTCCAGGA	NA	circbase	NA	NA	NA	NA	NA	NA	NA	NA	NA	NA	NA	hsa_circ_0049953	chr19	17313650	17316961	+	3311	421	NM_001130065	MYO9B
hsa_circ_0047024	3.85808	P	2.0996	A	3.38342	3.38342	up	circRNA	CATGATGCCTGCTAGTTATGATGGACAGATTTGAAAAATACCTCTCCTGAGCATGGTGGA	NA	circbase	NA	NA	NA	NA	NA	NA	NA	NA	NA	NA	NA	hsa_circ_0047024	chr18	13049763	13068236	+	18473	1868	NM_032142	CEP192
hsa_circ_0056507	4.88374	P	3.10603	A	3.42879	3.42879	up	circRNA	GCTGCCCCAGAATCCAACTGCCAGATGAGAACATTGGACAGTGGGATCGGAACCTTTCCA	NA	circbase	NA	NA	NA	NA	NA	NA	NA	NA	NA	NA	NA	hsa_circ_0056507	chr2	133483199	133489624	-	6425	585	NM_207363	NCKAP5
hsa_circ_0056715	4.11538	P	5.17382	P	0.480152	2.08267	down	circRNA	GTACACAAAGATATACTATGTAGTGCAAAAAGACTCAAGTTGTTAATGCAGCCTTTGAGT	NA	circbase	NA	NA	NA	NA	NA	NA	NA	NA	NA	NA	NA	hsa_circ_0056715	chr2	152289590	152292094	+	2504	270	NM_001177665	RIF1
hsa_circ_0063706	4.12098	P	5.13106	P	0.496519	2.01402	down	circRNA	ACTGGTCAAGTGAGTGACCTGCAGGAAGAAGGCAAGAATGCCATCAACTCACCGATGTCC	NA	circbase	NA	NA	NA	NA	NA	NA	NA	NA	NA	NA	NA	hsa_circ_0063706	chr22	44489807	44496003	+	6196	161	NM_001003828	PARVB
hsa_circ_0070295	3.47861	P	2.44129	A	2.05241	2.05241	up	circRNA	TTTGATCTAGGAGGTGGATCTTACTAATCCCAAGACGTTTAGAAACCTGGCTAAGCCAAT	NA	circbase	NA	NA	NA	NA	NA	NA	NA	NA	NA	NA	NA	hsa_circ_0070295	chr4	85623505	85626664	-	3159	379	NM_014991	WDFY3
hsa_circ_0064300	6.10937	P	5.0537	P	2.07868	2.07868	up	circRNA	TTTAGCCCAGGATCTAAAGAAGTACCACTTCTACTATTGGTTTTGCTATCCTGCCCTCTG	NA	circbase	NA	NA	NA	NA	NA	NA	NA	NA	NA	NA	NA	hsa_circ_0064300	chr3	11354777	11374567	+	19790	478	NM_006395	ATG7
hsa_circ_0021532	5.9689	P	4.58054	P	2.6178	2.6178	up	circRNA	TAAAGTGTTTTTCTACATCAAACAGTTCGTTAACTGCAGACGTAAATTCTGGATTTGCCA	NA	circbase	NA	NA	NA	NA	NA	NA	NA	NA	NA	NA	NA	hsa_circ_0021532	chr11	28042162	28045397	-	3235	777	NM_031217	KIF18A
hsa_circ_0085979	3.47248	P	4.52171	P	0.483226	2.06943	down	circRNA	ATGTTCTCTTCCATCAGTGGCTGCAGAGTCGAGAAGCCAAGCTCTGCAGCGCTTCAGCGA	NA	circbase	NA	NA	NA	NA	NA	NA	NA	NA	NA	NA	NA	hsa_circ_0085979	chr8	145245686	145245838	+	152	152	NM_032450	HEATR7A
hsa_circ_0083929	5.2151	P	3.27545	A	3.83612	3.83612	up	circRNA	GAGCTGTTTGTGTATGATATAGTGAAGAACTATACTGCTGACTATGACAAGGCCCTCATC	NA	circbase	NA	NA	NA	NA	NA	NA	NA	NA	NA	NA	NA	hsa_circ_0083929	chr8	37602088	37602214	+	126	126	NM_007175	ERLIN2
hsa_circ_0084991	5.35709	P	10.4201	M	0.0299147	33.4284	down	circRNA	TGTTTTAAATAAAAACGATTCACTTTAAAGCCTGTTCTGAAGACAGCCCACCCAAGCATG	NA	circbase	NA	NA	NA	NA	NA	NA	NA	NA	NA	NA	NA	hsa_circ_0084991	chr8	97345684	97346774	+	1090	1090	NM_014754	PTDSS1
hsa_circ_0040509	4.34455	P	5.99555	P	0.318418	3.14053	down	circRNA	CTACTCCGAGATCCTGAAGGACACAGCCCTGCAGAAAGTGAAGCGTGGCCAGAGCTGCCT	NA	circbase	NA	NA	NA	NA	NA	NA	NA	NA	NA	NA	NA	hsa_circ_0040509	chr16	74942805	74943815	-	1010	323	NM_030581	WDR59
hsa_circ_0044432	4.73735	P	1.68763	A	8.28053	8.28053	up	circRNA	AAATAAATAAATAAATATTCCCAGCAGCTTGAAATCCTTGATATCCCTGATGGGCACCGG	NA	circbase	NA	NA	NA	NA	NA	NA	NA	NA	NA	NA	NA	hsa_circ_0044432	chr17	47787686	47795076	-	7390	1584	NM_030802	FAM117A
hsa_circ_0013968	3.56167	P	2.47535	A	2.12331	2.12331	up	circRNA	CAGGACCTAAATCGGCCCTTTCTTCAAATAAGAGCAGTTGGAATAACAAAGCTGTTCAGT	NA	circbase	NA	NA	NA	NA	NA	NA	NA	NA	NA	NA	NA	hsa_circ_0013968	chr1	147759795	147760170	+	375	375	---	---
hsa_circ_0024522	6.70951	P	7.7822	P	0.475431	2.10336	down	circRNA	ATCAATGAGACCTGGATTGAAGGCCTGATGGATGATGTGGACTTCAAGGCAAAAGTGACT	NA	circbase	NA	NA	NA	NA	NA	NA	NA	NA	NA	NA	NA	hsa_circ_0024522	chr11	118918445	118923141	-	4696	1608	NM_006389	HYOU1
hsa_circ_0031771	5.72108	P	4.66527	P	2.07889	2.07889	up	circRNA	CTTTTATAGTAGTTGAAACTGATTTCTCAACTCCAACACCAAGAAGGAAAACCCCATTTA	NA	circbase	NA	NA	NA	NA	NA	NA	NA	NA	NA	NA	NA	hsa_circ_0031771	chr14	45672392	45673656	-	1264	1078	NM_018353	MIS18BP1
hsa_circ_0060643	4.0479	P	2.93298	A	2.16583	2.16583	up	circRNA	AGATAGACCAGGCCTGAAGCTGGGCATGGAGCGTGATGCCTACGTCATGATTGCGGAGAA	NA	circbase	NA	NA	NA	NA	NA	NA	NA	NA	NA	NA	NA	hsa_circ_0060643	chr20	47247265	47305342	-	58077	3407	NM_020820	PREX1
hsa_circ_0053223	3.38654	P	4.9074	P	0.348478	2.86962	down	circRNA	TCTCACTGCATGGCGGCAGGTGCGAGGGGAGAGAACATTGAGCATTTGAAGCTTCGACTT	NA	circbase	NA	NA	NA	NA	NA	NA	NA	NA	NA	NA	NA	hsa_circ_0053223	chr2	27477439	27486950	-	9511	3083	NM_003459	SLC30A3
hsa_circ_0071075	4.02749	P	1.14494	A	7.37454	7.37454	up	circRNA	GTCTTCCATAGGAGGTCACAATCACATTGAGCCAAAACGCATCCAGTGTTTTCTCCAGTT	NA	circbase	NA	NA	NA	NA	NA	NA	NA	NA	NA	NA	NA	hsa_circ_0071075	chr4	146560226	146581187	+	20961	5923	NM_172250	MMAA
hsa_circ_0087239	6.80932	P	1.1184	A	51.6583	51.6583	up	circRNA	CTTTTATAAGATCCCACAGCCAACAAAGATTCTGGCCAAGAGTCAGAGTCTATTCCAGAA	NA	circbase	NA	NA	NA	NA	NA	NA	NA	NA	NA	NA	NA	hsa_circ_0087239	chr9	79251386	79259825	-	8439	493	NM_015225	PRUNE2
hsa_circ_0053690	3.11045	A	4.38433	P	0.413547	2.4181	down	circRNA	AATCAACACAGTCCACAGAAAGCAAAGCTGGAAGCCAAGTTACATCAGACAACAGCTGCA	NA	circbase	NA	NA	NA	NA	NA	NA	NA	NA	NA	NA	NA	hsa_circ_0053690	chr2	32689576	32716625	+	27049	3399	NM_016252	BIRC6
hsa_circ_0030820	3.43056	P	2.16422	A	2.40552	2.40552	up	circRNA	CACAAATCAGGAGCTCATTTTGCAGCTCTCAAGCTTTTATAGCATGCTGTAAACAATTGT	NA	circbase	NA	NA	NA	NA	NA	NA	NA	NA	NA	NA	NA	hsa_circ_0030820	chr13	103459495	103460095	+	600	600	NM_001204425	BIVM-ERCC5
hsa_circ_0037355	1.18785	A	4.01468	P	0.140941	7.09515	down	circRNA	TCTTCTACAGATTAAAAAAATGGCAAACTCCTTTGCAGCGAGGATTTTCACTACCCTTTC	NA	circbase	NA	NA	NA	NA	NA	NA	NA	NA	NA	NA	NA	hsa_circ_0037355	chr16	1883983	1918185	-	34202	1698	NM_001163560	C16orf73
hsa_circ_0036162	3.50291	P	2.36573	A	2.19951	2.19951	up	circRNA	TTCTTTCCAGGAGGAATATAGAACTGAAGGTATCAGCTGGCACAACATAGATTACATTGA	NA	circbase	NA	NA	NA	NA	NA	NA	NA	NA	NA	NA	NA	hsa_circ_0036162	chr15	72196269	72270633	-	74364	1155	NM_006901	MYO9A
hsa_circ_0015795	1.20811	A	4.23627	P	0.122584	8.1577	down	circRNA	TCGTGATTATCTCGAGCAAATTAAGCACTGACTTCCTGATTTGCAAGAAGGTGCAGGAGC	NA	circbase	NA	NA	NA	NA	NA	NA	NA	NA	NA	NA	NA	hsa_circ_0015795	chr1	197611840	197744623	-	132783	1010	NM_001195215	DENND1B
hsa_circ_0021044	6.24658	P	5.07849	P	2.24715	2.24715	up	circRNA	TCATGGACACCGTGATATTGTACAGAAGTCCTCAGGCTTCCCCAATCCAGGGGACTCGGC	NA	circbase	NA	NA	NA	NA	NA	NA	NA	NA	NA	NA	NA	hsa_circ_0021044	chr11	6625455	6629441	+	3986	301	NM_001014794	ILK
hsa_circ_0033477	5.84689	P	9.89728	M	0.0603547	16.5687	down	circRNA	AGTGACCATGTGAAGTTATTCGAAGTCATTGAAACTGAAAAAACACTCTACCTAATCATG	NA	circbase	NA	NA	NA	NA	NA	NA	NA	NA	NA	NA	NA	hsa_circ_0033477	chr14	103918254	103934523	+	16269	918	NM_001128918	MARK3
hsa_circ_0068312	3.38624	P	4.48964	P	0.465417	2.14861	down	circRNA	TGATGGTGGGGGGTATGTCTTTGGGTGGGTGGGCCCACACAAGCGGCGCACCGTTAAGAT	NA	circbase	NA	NA	NA	NA	NA	NA	NA	NA	NA	NA	NA	hsa_circ_0068312	chr3	183962565	183966759	-	4194	1056	NM_005787	ALG3
hsa_circ_0071811	1.99535	A	3.95626	P	0.256866	3.89307	down	circRNA	AAGATCCCCCTGAAGAGGTGCCAGTTCTACCGCACACGCAGTGTTGGTGTGTGAGACTTG	NA	circbase	NA	NA	NA	NA	NA	NA	NA	NA	NA	NA	NA	hsa_circ_0071811	chr5	9154599	9437964	-	283365	1655	NM_003966	SEMA5A
hsa_circ_0009883	3.44508	P	4.46928	P	0.491683	2.03383	down	circRNA	ATCCATGGCAACGGGCCAACCAAGGCGCTTGGCCTAGGGGAGGACTGGAATGTGGAGAAG	NA	circbase	NA	NA	NA	NA	NA	NA	NA	NA	NA	NA	NA	hsa_circ_0009883	chr1	12009829	12017071	+	7242	573	NM_000302	PLOD1
hsa_circ_0058969	4.31835	P	5.55997	P	0.422897	2.36464	down	circRNA	GGATCAACGACACGACCAACGACAACATGTCCTACTCCGTGGAGCTCTGCGAGGACCTCT	NA	circbase	NA	NA	NA	NA	NA	NA	NA	NA	NA	NA	NA	hsa_circ_0058969	chr2	241726667	241726733	-	66	66	NM_001244008	KIF1A
hsa_circ_0052657	4.82145	P	3.20504	A	3.06612	3.06612	up	circRNA	CTCTGTCCAGGTTTCTCTGGGAATTGTGTTGGCTGTGGAAAGAAAGGCTTCTGTTACTTC	NA	circbase	NA	NA	NA	NA	NA	NA	NA	NA	NA	NA	NA	hsa_circ_0052657	chr2	11716478	11735505	+	19027	1371	NM_014668	GREB1
hsa_circ_0031913	4.88577	P	6.50889	P	0.324633	3.0804	down	circRNA	AAATGGCAGATTGATCAGGTTAAGATTCTGTGTCACCAGTTGCTGGTCCAGGTTTGTGAC	NA	circbase	NA	NA	NA	NA	NA	NA	NA	NA	NA	NA	NA	hsa_circ_0031913	chr14	52164859	52169306	+	4447	248	NM_001042481	FRMD6
hsa_circ_0054620	3.85039	P	2.40347	A	2.72625	2.72625	up	circRNA	GGCAGGAATTGTAACTCATAATCAGGAAAATGTGTTTGACCTGCAATGGATGGAAGTGAC	NA	circbase	NA	NA	NA	NA	NA	NA	NA	NA	NA	NA	NA	hsa_circ_0054620	chr2	55582714	55589584	-	6870	314	NM_001135597	CCDC88A
hsa_circ_0070670	4.01888	P	2.43963	A	2.98814	2.98814	up	circRNA	CAGTCTTCAGGAAGAAATCTTTCCTGTTTTCTGCTCTGTATGCTGCCTTTATATTCGGTG	NA	circbase	NA	NA	NA	NA	NA	NA	NA	NA	NA	NA	NA	hsa_circ_0070670	chr4	111026652	111026784	-	132	132	NM_024090	ELOVL6
hsa_circ_0077983	3.64377	P	2.63521	A	2.0119	2.0119	up	circRNA	GAGCTTCTTGGAAATAATTTGCCAGAAGAATACTATGTGCACTGGGAACTACACCTTTGT	NA	circbase	NA	NA	NA	NA	NA	NA	NA	NA	NA	NA	NA	hsa_circ_0077983	chr6	137015277	137026271	-	10994	665	NM_005923	MAP3K5
hsa_circ_0079621	2.81732	A	5.58153	P	0.147195	6.79373	down	circRNA	TGTAAATAGAGAAGATCCAAATTGGTGGCAGCAATGCAGCAAGTCTTGGAAAACCTTACG	NA	circbase	NA	NA	NA	NA	NA	NA	NA	NA	NA	NA	NA	hsa_circ_0079621	chr7	24663284	24703340	+	40056	785	NM_016447	MPP6
hsa_circ_0034241	5.67893	P	8.18297	P	0.176281	5.67275	down	circRNA	GGGCGATCAGGGCAAGTGTGGTCTTGGGGAGATGGTGACTATGGGAAATTGGGCAGAGGT	NA	circbase	NA	NA	NA	NA	NA	NA	NA	NA	NA	NA	NA	hsa_circ_0034241	chr15	28467173	28508315	-	41142	3782	NM_004667	HERC2
hsa_circ_0070851	3.80198	P	2.42601	A	2.59543	2.59543	up	circRNA	GGAAAAAATGAAAGATTTAATTCAAGACTGGTCTAGTGACAGTCCTCCAGACATTTTTTC	NA	circbase	NA	NA	NA	NA	NA	NA	NA	NA	NA	NA	NA	hsa_circ_0070851	chr4	123128264	123193560	+	65296	6948	NM_015312	KIAA1109
hsa_circ_0090078	3.00681	A	4.32345	P	0.401468	2.49086	down	circRNA	GATAATAATGGATTTCCAGCAGGAGAGCTCCAGAAGCCTTTCTTTTGGGGAACAGAATAT	NA	circbase	NA	NA	NA	NA	NA	NA	NA	NA	NA	NA	NA	hsa_circ_0090078	chrX	22231020	22237220	+	6200	123	NM_000444	PHEX
hsa_circ_0026301	6.72352	P	4.10524	P	6.14017	6.14017	up	circRNA	TAAATGCCAGCCACATCCATCCTGAAGCGGCAGAAGCAGCTGCGGAGGAAGAATGTACGC	NA	circbase	NA	NA	NA	NA	NA	NA	NA	NA	NA	NA	NA	hsa_circ_0026301	chr12	51461455	51467865	-	6410	557	NR_045072	CSRNP2
hsa_circ_0078472	5.45679	P	4.2309	P	2.33899	2.33899	up	circRNA	TAATAAAATTTTGCAGATCAAGTGCTGTTTGGCACGGCCGATGGGCAGGTGATTGTCATG	NA	circbase	NA	NA	NA	NA	NA	NA	NA	NA	NA	NA	NA	hsa_circ_0078472	chr6	158870027	158932856	+	62829	9219	NM_020245	TULP4
hsa_circ_0036152	3.70963	P	1.81964	A	3.70633	3.70633	up	circRNA	CTAGATACAGGTGGAAGAACACAATGGTCACATCTTTAAAGCCACCCAATATAGCATCCC	NA	circbase	NA	NA	NA	NA	NA	NA	NA	NA	NA	NA	NA	hsa_circ_0036152	chr15	72146717	72154952	-	8235	367	NM_006901	MYO9A
hsa_circ_0070315	4.0742	P	5.1493	P	0.474638	2.10687	down	circRNA	TCCTCAAAAGTCAAAGAGAAGATCACAGGGATTGTCACTGGATGCAGTGTATCATTGCCT	NA	circbase	NA	NA	NA	NA	NA	NA	NA	NA	NA	NA	NA	hsa_circ_0070315	chr4	85648013	85661569	-	13556	1038	NM_014991	WDFY3
hsa_circ_0077154	3.91338	P	5.02688	P	0.46217	2.16371	down	circRNA	AGAGTTAAAGTTAGATGACACCGAGAGAAGAATTAAGCCCCTCGGAAACCAAGCCCTAAG	NA	circbase	NA	NA	NA	NA	NA	NA	NA	NA	NA	NA	NA	hsa_circ_0077154	chr6	80222928	80223458	-	530	530	NM_181714	LCA5
hsa_circ_0078433	2.82651	A	3.94207	P	0.461513	2.16679	down	circRNA	GAGTGACATGGTTCACAGCAAACAGGATTCCTAAATGCCCTTAAGGACAGTCCTGCAAGC	NA	circbase	NA	NA	NA	NA	NA	NA	NA	NA	NA	NA	NA	hsa_circ_0078433	chr6	158053865	158074659	+	20794	365	NM_024630	ZDHHC14
hsa_circ_0014212	3.93775	P	2.53137	A	2.65072	2.65072	up	circRNA	ACTTTCAATTCCAACCAGTTCTAAGGGACCATACAGAGTATTCCTCTCTTCACACCAGGA	NA	circbase	NA	NA	NA	NA	NA	NA	NA	NA	NA	NA	NA	hsa_circ_0014212	chr1	153003678	153005376	+	1698	619	NM_003125	SPRR1B
hsa_circ_0049101	3.55273	P	2.40619	A	2.21383	2.21383	up	circRNA	AACATCACAGACAACGTCATGCAGCACCTGGCCAGAGAAAGATGGGGAAGCCACCGGAGT	NA	circbase	NA	NA	NA	NA	NA	NA	NA	NA	NA	NA	NA	hsa_circ_0049101	chr19	8987209	8993545	-	6336	334	NM_024690	MUC16
hsa_circ_0051579	3.95021	P	1.13032	A	7.0611	7.0611	up	circRNA	TCCAGATGAATCATTGAAGATTTGACTCACAAGACAGGGAACTTCAAACAGTTCAACATC	NA	circbase	NA	NA	NA	NA	NA	NA	NA	NA	NA	NA	NA	hsa_circ_0051579	chr19	46506676	46519651	+	12975	829	NM_001080402	CCDC61
hsa_circ_0007328	2.99116	A	4.85958	P	0.273873	3.65133	down	circRNA	AAGAGCCAGATCTCGGAGAAGCAGAGGCACTGCCTGGAGCTGCAGGAGAAGAACGCCCAG	NA	circbase	NA	NA	NA	NA	NA	NA	NA	NA	NA	NA	NA	hsa_circ_0007328	chr19	2213537	2214595	+	1058	366	NM_032482	DOT1L
hsa_circ_0087884	7.61761	P	5.04814	P	5.93591	5.93591	up	circRNA	CCAGTATGGCCTATTCTCTGTATTTATTTACTAGATAATTTCTGCTGCTGAAACATTGAC	NA	circbase	NA	NA	NA	NA	NA	NA	NA	NA	NA	NA	NA	hsa_circ_0087884	chr9	111714488	111727808	-	13320	395	NM_003798	CTNNAL1
hsa_circ_0001453	7.50693	P	12.7882	M	0.0257154	38.8872	down	circRNA	TTGTGAATATTTGTCTGAGGGAAGTCAAAAGCATGCAAGCCTACAGAAAAGCATTGAGAA	NA	circbase	NA	NA	NA	NA	NA	NA	NA	NA	NA	NA	NA	hsa_circ_0001453	chr4	154315413	154336050	+	20637	383	NM_032117	MND1
hsa_circ_0065961	2.90837	A	4.62835	P	0.303552	3.29432	down	circRNA	GTGAAATAAAGTGATGCAATTAGACCCCAACTCCAGCTCTGATTGTATATGGAGACCAGG	NA	circbase	NA	NA	NA	NA	NA	NA	NA	NA	NA	NA	NA	hsa_circ_0065961	chr3	52002525	52003621	-	1096	1096	NM_032750	ABHD14B
hsa_circ_0082226	3.55074	P	5.21589	P	0.31531	3.17148	down	circRNA	AAATAAAGTGCGGCTGTCGCAGAGTGAGGCCAGCTCTCAGGACATGACTGCACAGGTGAC	NA	circbase	NA	NA	NA	NA	NA	NA	NA	NA	NA	NA	NA	hsa_circ_0082226	chr7	128494466	128499328	+	4862	2202	NM_001458	FLNC
hsa_circ_0031145	12.1284	P	15.1779	M	0.120782	8.27937	down	circRNA	TTCAATTCTAAGAGTGGACAGCGGGGATCTTCCAAGTCTGGAAAGTGATGTACAGTTACC	NA	circbase	NA	NA	NA	NA	NA	NA	NA	NA	NA	NA	NA	hsa_circ_0031145	chr14	21681118	21681276	-	158	158	NM_031314	HNRNPC
hsa_circ_0078555	1.8186	A	3.49497	P	0.312869	3.19622	down	circRNA	GTTAACCCAGAACGTAAAAATCTAAAATGAGAATCAGATATCACCAAGGAGAGAATTCAG	NA	circbase	NA	NA	NA	NA	NA	NA	NA	NA	NA	NA	NA	hsa_circ_0078555	chr6	160200658	160202142	-	1484	657	NM_030752	TCP1
hsa_circ_0084836	3.72064	P	1.9166	A	3.49196	3.49196	up	circRNA	TTTGTGCCAGAAAAAAGAGTGGATTCAACAGACAGGGTTTACTTTGTGAATCATAACACA	NA	circbase	NA	NA	NA	NA	NA	NA	NA	NA	NA	NA	NA	hsa_circ_0084836	chr8	87443634	87447756	+	4122	290	NM_007013	WWP1
hsa_circ_0054547	4.25645	P	2.93211	A	2.50419	2.50419	up	circRNA	GAGGTTCTAAGCACTGGACATTTGAAAAGGCAGAACAGATTATATTTGATCATTTTTCTG	NA	circbase	NA	NA	NA	NA	NA	NA	NA	NA	NA	NA	NA	hsa_circ_0054547	chr2	54119944	54120936	-	992	279	NM_014614	PSME4
hsa_circ_0024239	4.93121	P	2.60141	A	5.02737	5.02737	up	circRNA	GAGGAAATTAACTATCTGTACTTATAAGAAGGCATAAATATTCCAGCAGACCAGCCAATT	NA	circbase	NA	NA	NA	NA	NA	NA	NA	NA	NA	NA	NA	hsa_circ_0024239	chr11	108204612	108206688	+	2076	341	NM_000051	ATM
hsa_circ_0060939	7.59596	P	5.91204	P	3.21301	3.21301	up	circRNA	AATTGTATGCTGCTGTCACAGAGCTCCAGCTGGCTGCGGTGGAAACGGACAGGAGGAAAC	NA	circbase	NA	NA	NA	NA	NA	NA	NA	NA	NA	NA	NA	hsa_circ_0060939	chr20	52779255	52790516	-	11261	1388	NM_000782	CYP24A1
hsa_circ_0004301	2.23364	A	3.8848	P	0.318385	3.14086	down	circRNA	CAATTTCATGGCCGTTATGGAACACCTGAAGAGCTACAAGAACTGGTAGACACAGCTCAT	NA	circbase	NA	NA	NA	NA	NA	NA	NA	NA	NA	NA	NA	hsa_circ_0004301	chr3	81627075	81692141	-	65066	836	NM_000158	GBE1
hsa_circ_0068480	1.86433	A	4.30589	P	0.184085	5.43229	down	circRNA	CAAAAACTACCATTCGCCTGATGAACTCTCAGGCAAGGGGAGAGCCAGTTGCGCAGAGCC	NA	circbase	NA	NA	NA	NA	NA	NA	NA	NA	NA	NA	NA	hsa_circ_0068480	chr3	186681572	186769134	+	87562	1029	NM_173216	ST6GAL1
hsa_circ_0086451	4.17774	P	2.06801	A	4.31611	4.31611	up	circRNA	TGGAAAACCAAATAAAGAAATTCTTCTCATCATTTTGTAGAGACATTTAACATAAAACCA	NA	circbase	NA	NA	NA	NA	NA	NA	NA	NA	NA	NA	NA	hsa_circ_0086451	chr9	19087088	19089557	-	2469	214	NM_017645	HAUS6
hsa_circ_0016719	3.86262	P	2.3408	A	2.87152	2.87152	up	circRNA	TCTGTGTATGGCATTTCCAGCAGTGAGGAGACAGCCAGAAGCAAGCTTTTGGAGCTGAAG	NA	circbase	NA	NA	NA	NA	NA	NA	NA	NA	NA	NA	NA	hsa_circ_0016719	chr1	227058962	227076750	+	17788	1136	NM_000447	PSEN2
hsa_circ_0091348	4.43194	P	2.44062	A	3.976	3.976	up	circRNA	AAATTGCCAATCTCTTCAGGACAGAAAGTCATGTTCTATGTCTCCTCAGGACACAGTTAC	NA	circbase	NA	NA	NA	NA	NA	NA	NA	NA	NA	NA	NA	hsa_circ_0091348	chrX	110978278	111003875	+	25597	1605	NR_033127	ALG13
hsa_circ_0077725	4.62777	P	7.28048	P	0.159021	6.28846	down	circRNA	ATAAACATTTTGTTTCCTTGACGTTAATCTGGCCCCTCTGTGGAGGAGCTGGAAAGAGAG	NA	circbase	NA	NA	NA	NA	NA	NA	NA	NA	NA	NA	NA	hsa_circ_0077725	chr6	117881432	117898634	-	17202	3923	NM_020399	GOPC
hsa_circ_0008745	2.62035	A	3.75989	P	0.453904	2.20311	down	circRNA	CCAGCAGGAGGAGATGCTAAAGAATTAGTGATGGAATGGGGAGAAGATATTAAAGCAGTT	NA	circbase	NA	NA	NA	NA	NA	NA	NA	NA	NA	NA	NA	hsa_circ_0008745	chr1	211956570	211966532	-	9962	489	NM_014873	LPGAT1
hsa_circ_0015542	5.24327	P	6.62965	P	0.382523	2.61422	down	circRNA	GAGCAGCATGTATTATTCTGCTCCCTGTACCTATGAGCTGGCCCTGAAGTACCTGAATAT	NA	circbase	NA	NA	NA	NA	NA	NA	NA	NA	NA	NA	NA	hsa_circ_0015542	chr1	181727893	181745364	+	17471	773	NM_001205293	CACNA1E
hsa_circ_0035811	5.14559	P	3.25453	A	3.70909	3.70909	up	circRNA	CTTTGAAGAGGACTAATGGCTGAAGGATAAATCAACATGGCAACTATGATTCCACCAGTG	NA	circbase	NA	NA	NA	NA	NA	NA	NA	NA	NA	NA	NA	hsa_circ_0035811	chr15	64056294	64067848	-	11554	1052	NM_003922	HERC1
hsa_circ_0014357	3.51952	P	1.32458	A	4.57871	4.57871	up	circRNA	TTGGGTGCAGAGATGACTTGCTGCATATTGGACCAGGGAATAAGAACTATACTTACATGG	NA	circbase	NA	NA	NA	NA	NA	NA	NA	NA	NA	NA	NA	hsa_circ_0014357	chr1	153973331	153994819	-	21488	1088	NM_207308	NUP210L
hsa_circ_0024186	4.32087	P	3.27918	A	2.05863	2.05863	up	circRNA	CCTTGTATAGGTTCTTCATATGCCTTTGACAGCACCTGTATGCAATAGAAGTATCCCTCA	NA	circbase	NA	NA	NA	NA	NA	NA	NA	NA	NA	NA	NA	hsa_circ_0024186	chr11	108040470	108040579	-	109	109	NM_002519	NPAT
hsa_circ_0007673	4.38312	P	3.15754	A	2.3385	2.3385	up	circRNA	TTGTCGGAGAAGGAGAAAAAACTAGAGAAGAGAAGAAATCTCTGAAACGAACTTTTCAGC	NA	circbase	NA	NA	NA	NA	NA	NA	NA	NA	NA	NA	NA	hsa_circ_0007673	chr20	36685939	36694658	+	8719	410	NM_021215	RPRD1B
hsa_circ_0027976	3.91632	P	5.28793	P	0.38646	2.58759	down	circRNA	TGATGTATAGCTGACGGTGAGAAATCTGCAGTTTGAAGATGGAAAAATGATCCCTGCCTC	NA	circbase	NA	NA	NA	NA	NA	NA	NA	NA	NA	NA	NA	hsa_circ_0027976	chr12	105445867	105455530	-	9663	614	NM_001034173	ALDH1L2
hsa_circ_0063908	3.13012	A	4.36465	P	0.424982	2.35304	down	circRNA	TTCTCTCTCAGTACTTGGTGACCACCCTGATGGGCGCCGACCTGAACAACATCGTCAAGT	NA	circbase	NA	NA	NA	NA	NA	NA	NA	NA	NA	NA	NA	hsa_circ_0063908	chr22	50702141	50705911	-	3770	2025	NM_002751	MAPK11
hsa_circ_0049648	9.72373	P	10.7662	P	0.4855	2.05973	down	circRNA	ATTAAATTAAATTTTGTGTCTCCGACTGGGACAAGCCCGAGCATATCCCTGACCCTGATG	NA	circbase	NA	NA	NA	NA	NA	NA	NA	NA	NA	NA	NA	hsa_circ_0049648	chr19	13051354	13055304	+	3950	1129	NM_004343	CALR
hsa_circ_0082559	5.77776	P	2.43903	A	10.1171	10.1171	up	circRNA	TATTGAAGTCATTGGATTTACCATGGCCTCTTTGATATTGTGCTGGCACAATGCCCTGGG	NA	circbase	NA	NA	NA	NA	NA	NA	NA	NA	NA	NA	NA	hsa_circ_0082559	chr7	137255920	137256032	-	112	112	NM_004717	DGKI
hsa_circ_0008570	3.28167	P	4.87976	P	0.330315	3.02742	down	circRNA	ATCTTGCAGAGGTGGGTAAAAGGAGAGTCTCAGAACTTCTGACTTCTAACTTAAACTAAA	NA	circbase	NA	NA	NA	NA	NA	NA	NA	NA	NA	NA	NA	hsa_circ_0008570	chr2	111283980	113135630	-	1851650	1742858	NM_022662	ANAPC1
hsa_circ_0002612	4.24728	P	5.36817	P	0.459808	2.17482	down	circRNA	GGGATGAAAGGAATCATTAACCAATGGCAACAGGAATCCAAGGATAAAGTGATTTCCCTC	NA	circbase	NA	NA	NA	NA	NA	NA	NA	NA	NA	NA	NA	hsa_circ_0002612	chr14	55168779	55204005	+	35226	783	NM_015589	SAMD4A
hsa_circ_0035798	3.06412	A	4.22075	P	0.448557	2.22937	down	circRNA	TCACTATCAGAGAATGCAACTGGATATCATCCTGACAAGTTTGCAAGATCATACCCACGT	NA	circbase	NA	NA	NA	NA	NA	NA	NA	NA	NA	NA	NA	hsa_circ_0035798	chr15	63988322	64025344	-	37022	2475	NM_003922	HERC1
hsa_circ_0067186	4.7357	P	5.8588	P	0.459107	2.17814	down	circRNA	AACTTTCAAGTTGGCCACGGACAGAGCGAAGGGGAGAGGATGGTAGTGTCTGACTTCCAC	NA	circbase	NA	NA	NA	NA	NA	NA	NA	NA	NA	NA	NA	hsa_circ_0067186	chr3	127439895	127441409	-	1514	248	NM_007283	MGLL
hsa_circ_0048720	3.94395	P	5.11187	P	0.445064	2.24687	down	circRNA	CGACTTTGTATTAAAGGAAGATCGTCTGAATCAAGTGTGATCAGTATTGGCCCAACAGAG	NA	circbase	NA	NA	NA	NA	NA	NA	NA	NA	NA	NA	NA	hsa_circ_0048720	chr19	5205518	5214491	-	8973	2619	NM_002850	PTPRS
hsa_circ_0015818	4.69649	P	3.02937	A	3.17581	3.17581	up	circRNA	CAGTGTCCAGGGATGCTGTTTGGATATTTCATCAATGATAAAAGAGGCTCAAAAGAATGC	NA	circbase	NA	NA	NA	NA	NA	NA	NA	NA	NA	NA	NA	hsa_circ_0015818	chr1	200529849	200530008	-	159	159	NM_014875	KIF14
hsa_circ_0004157	1.28247	A	3.76587	P	0.178822	5.59215	down	circRNA	CCCTAGATCACATTACAGCATAAACTTTCTTTAGACTACTCTGCAATGATGTTTTCACAT	NA	circbase	NA	NA	NA	NA	NA	NA	NA	NA	NA	NA	NA	hsa_circ_0004157	chr1	36753077	36754354	+	1277	1277	NM_005119	THRAP3
hsa_circ_0007600	3.28754	P	1.12937	A	4.46346	4.46346	up	circRNA	ACTCTCTCAATTACTAAATAAGAAAAGCAACCCTCAGAATTAAACCCAGTGCTGACAAAG	NA	circbase	NA	NA	NA	NA	NA	NA	NA	NA	NA	NA	NA	hsa_circ_0007600	chr1	21377358	21386287	-	8929	8929	NM_001198801	EIF4G3
hsa_circ_0082362	5.38533	P	6.39444	P	0.496853	2.01267	down	circRNA	GTTAAGCTGGGACTGGAAAATTGATTAGTTCATACTACAATGTGACATACTGGCCCCTCT	NA	circbase	NA	NA	NA	NA	NA	NA	NA	NA	NA	NA	NA	hsa_circ_0082362	chr7	129832461	129843686	-	11225	635	NM_032842	TMEM209
hsa_circ_0082539	2.29793	A	4.48253	P	0.219974	4.54598	down	circRNA	AACCTTGTTTAAAAGCAGAAGACTGCAAGCCAAGAAAACCATGTGGGAAAGGCTGACAGC	NA	circbase	NA	NA	NA	NA	NA	NA	NA	NA	NA	NA	NA	hsa_circ_0082539	chr7	135307524	135330344	+	22820	1482	NM_015135	NUP205
hsa_circ_0087669	4.12882	P	5.17871	P	0.483005	2.07037	down	circRNA	TGACCTGTGTAAAGATGATTTTAAGGAGGTATTTAACTGAAAGGAATATCTGCTTCACTG	NA	circbase	NA	NA	NA	NA	NA	NA	NA	NA	NA	NA	NA	hsa_circ_0087669	chr9	100373855	100389894	-	16039	779	NM_139246	TSTD2
hsa_circ_0011209	6.83457	P	1.10159	A	53.1862	53.1862	up	circRNA	ACTGTCCTTATCTTCAAGATCATGAGCGTCTTGTTGTTCATCGAGCACTCAGTAGAGGTG	NA	circbase	NA	NA	NA	NA	NA	NA	NA	NA	NA	NA	NA	hsa_circ_0011209	chr1	31210450	31215396	-	4946	519	NM_006762	LAPTM5
hsa_circ_0083521	6.06854	P	8.29562	P	0.213591	4.68185	down	circRNA	ATGGTGTTAAACGAATACTGGAAAACCCACAGTCCTCTTACTCCCAGTTACTGGCAGCTA	NA	circbase	NA	NA	NA	NA	NA	NA	NA	NA	NA	NA	NA	hsa_circ_0083521	chr8	21826993	21837714	+	10721	792	NM_015024	XPO7
hsa_circ_0065028	3.82785	P	2.4717	A	2.56002	2.56002	up	circRNA	TCTTTGCATATAATGAAGGTGATGCCATCAAAGTTTTTGTGCGAATTCGTCCTCCTGCAG	NA	circbase	NA	NA	NA	NA	NA	NA	NA	NA	NA	NA	NA	hsa_circ_0065028	chr3	44816745	44819683	+	2938	261	NM_020242	KIF15
hsa_circ_0021106	2.77682	A	5.47327	P	0.154272	6.48204	down	circRNA	GCCCACACAGATTTCACACCCTTTGGAGAGTTTCTTTCTTGGATAATTCAGGAAGATGAG	NA	circbase	NA	NA	NA	NA	NA	NA	NA	NA	NA	NA	NA	hsa_circ_0021106	chr11	8739287	8860897	-	121610	1784	NM_005418	ST5
hsa_circ_0048595	4.63135	P	3.54731	P	2.11997	2.11997	up	circRNA	ATCGATGTGGAACAGCCGGTGCTTCCTGAAGGTGAGCCGGCTGGAGGCACAACTGCTCCT	NA	circbase	NA	NA	NA	NA	NA	NA	NA	NA	NA	NA	NA	hsa_circ_0048595	chr19	4327312	4328806	-	1494	205	NM_017720	STAP2
hsa_circ_0072993	1.8431	A	3.94753	P	0.232543	4.30028	down	circRNA	ATAATGGAAGGGGCAGATGATGATCTATGCGAAGTTTGACAAAAATGTGTATCTTCCTGA	NA	circbase	NA	NA	NA	NA	NA	NA	NA	NA	NA	NA	NA	hsa_circ_0072993	chr5	73045661	73164052	+	118391	2392	NM_001080479	RGNEF
hsa_circ_0057132	4.745	P	3.54338	A	2.29997	2.29997	up	circRNA	TGTCAATACCACAAACCAGCAAGATGCCCCCTAAAAAGGGAGGTGATGGAATTAAACCAC	NA	circbase	NA	NA	NA	NA	NA	NA	NA	NA	NA	NA	NA	hsa_circ_0057132	chr2	175094035	175111543	-	17508	245	NM_013341	OLA1
hsa_circ_0006674	7.80945	P	6.0288	P	3.43579	3.43579	up	circRNA	CCATGTGAAAGAGGGTTTCGAAAAAACGATGAAATGAAAGCTATGGATGTTTTACCAATT	NA	circbase	NA	NA	NA	NA	NA	NA	NA	NA	NA	NA	NA	hsa_circ_0006674	chr5	14270933	14336836	+	65903	1889	NM_007118	TRIO
hsa_circ_0038394	4.12245	P	2.90607	A	2.32363	2.32363	up	circRNA	AAGTGTCTTTCAAATAAAGAGTGCCTCACATCCAAGGGGAGAGAGCTAACACGCATCTCA	NA	circbase	NA	NA	NA	NA	NA	NA	NA	NA	NA	NA	NA	hsa_circ_0038394	chr16	20837154	20844445	+	7291	678	NM_001199053	LOC81691
hsa_circ_0037947	1.11683	A	7.85428	P	0.00937187	106.702	down	circRNA	GTGTCTCAAATAAAAGACATTTTGATGTAGCCACTCAATGACAAAAATAGTAACAGTGGG	NA	circbase	NA	NA	NA	NA	NA	NA	NA	NA	NA	NA	NA	hsa_circ_0037947	chr16	14339384	14360630	+	21246	7400	NM_014048	MKL2
hsa_circ_0024231	3.23499	P	1.63573	A	3.02987	3.02987	up	circRNA	TACTTATAAGGATCTTCTCTTAGAAATCTACAGAAGTATAGGGGAGCCAGATAGTTTGTA	NA	circbase	NA	NA	NA	NA	NA	NA	NA	NA	NA	NA	NA	hsa_circ_0024231	chr11	108186549	108206688	+	20139	2262	NM_000051	ATM
hsa_circ_0061761	5.17599	P	4.13051	P	2.06405	2.06405	up	circRNA	TAACTGAGTCACCATATCCCAGTAAAGCTGAATTTTCTCACTATGCGCAGACACCCTCAG	NA	circbase	NA	NA	NA	NA	NA	NA	NA	NA	NA	NA	NA	hsa_circ_0061761	chr21	40759691	40769815	+	10124	1463	NM_001146218	WRB
hsa_circ_0070681	2.39163	A	8.00816	P	0.0203824	49.062	down	circRNA	TGTTAACAACTTCTCTTCCTCGGGAAGTAAAGAAGAGACTGCTTTTCAAGCTGTTATTCC	NA	circbase	NA	NA	NA	NA	NA	NA	NA	NA	NA	NA	NA	hsa_circ_0070681	chr4	113483526	113527247	-	43721	1979	NM_018392	C4orf21
hsa_circ_0087738	4.75157	P	1.37414	A	10.3922	10.3922	up	circRNA	GATGAGGTGCATTCATAATCCACTTAGGAAAAAGGAGGGGGGATGCACGGAGTTAGCACA	NA	circbase	NA	NA	NA	NA	NA	NA	NA	NA	NA	NA	NA	hsa_circ_0087738	chr9	102118838	102130090	-	11252	671	TCONS_l2_00030034	TCONS_l2_00030034
hsa_circ_0008828	3.54788	P	4.57215	P	0.49166	2.03393	down	circRNA	CCTGGCCTTGATGGAGATACACGTGAATTAGAGCGAACAAAACAATATGTAAATGAAGCT	NA	circbase	NA	NA	NA	NA	NA	NA	NA	NA	NA	NA	NA	hsa_circ_0008828	chr4	47905209	47907363	-	2154	241	NM_152995	NFXL1
hsa_circ_0000177	3.29928	P	1.83472	A	2.75978	2.75978	up	circRNA	GTTCCTGCTGGTCACTGTAAAACCCCAGAGCAGTTTCCATTTGCCAGTCCTACGATCCCA	NA	circbase	NA	NA	NA	NA	NA	NA	NA	NA	NA	NA	NA	hsa_circ_0000177	chr1	207760730	207790147	+	29417	1359	NM_000573	CR1
hsa_circ_0068416	3.86218	P	5.13592	P	0.413587	2.41787	down	circRNA	GTGGAACAAGGTAAAGTGGAATTGCATGGGAAAATCATGGAAGTTGATTACTCAGTCTCT	NA	circbase	NA	NA	NA	NA	NA	NA	NA	NA	NA	NA	NA	hsa_circ_0068416	chr3	185414399	185541001	-	126602	162	NM_006548	IGF2BP2
hsa_circ_0002046	3.25141	P	2.14821	A	2.14831	2.14831	up	circRNA	CCATATCAGGTTATCTGACTGGATCAAGATTGGAGATCTGACTTCCAAAAATTGTCATCT	NA	circbase	NA	NA	NA	NA	NA	NA	NA	NA	NA	NA	NA	hsa_circ_0002046	chr13	23939304	23945304	-	6000	286	NM_014363	SACS
hsa_circ_0010276	2.33239	A	5.16898	P	0.139991	7.1433	down	circRNA	TCCCATTGAGAATGAAGAAGACCGGAAGAAGTGAATCAGAAATCCTGCACCATGAGAAGC	NA	circbase	NA	NA	NA	NA	NA	NA	NA	NA	NA	NA	NA	hsa_circ_0010276	chr1	19441304	19528309	-	87005	11026	NM_020765	UBR4
hsa_circ_0072140	3.93832	P	2.83451	A	2.14922	2.14922	up	circRNA	TAAATTACAGGTGCTGATAGCTTATTGGATATAAGTTCTGAAGCTGACCAACAAGATCTT	NA	circbase	NA	NA	NA	NA	NA	NA	NA	NA	NA	NA	NA	hsa_circ_0072140	chr5	34821836	34821955	+	119	119	NM_001145525	RAI14
hsa_circ_0023670	4.08515	P	2.85728	A	2.34221	2.34221	up	circRNA	TTGTTACATGGTTTGAATGTTTCAAGATCAAGAACTCAGTAAACTACCATCTGCTTTTTA	NA	circbase	NA	NA	NA	NA	NA	NA	NA	NA	NA	NA	NA	hsa_circ_0023670	chr11	76696686	76709865	+	13179	177	NM_018367	ACER3
hsa_circ_0000307	5.26032	P	1.30771	A	15.483	15.483	up	circRNA	ATGTTGACACTGTTGACGTATGCAGGTAGGAGCAATAGTTACTGAATACCAGGGCAGTCA	NA	circbase	NA	NA	NA	NA	NA	NA	NA	NA	NA	NA	NA	hsa_circ_0000307	chr11	58766935	58767054	-	119	119	NR_033853	LOC283194
hsa_circ_0062694	5.2754	P	4.1894	P	2.12285	2.12285	up	circRNA	GCTGCACCTGGTGACCAGACAGGAGAATGCCGAGCTCATGGGAATCTGGGCTCTGCATTC	NA	circbase	NA	NA	NA	NA	NA	NA	NA	NA	NA	NA	NA	hsa_circ_0062694	chr22	28392122	28692316	-	300194	4442	NM_001145418	TTC28
hsa_circ_0020236	4.03128	P	5.25458	P	0.428303	2.3348	down	circRNA	TCTTGCTTGAGTACGAAACCAGCACTGGAGCCTCATTATGGAAAGTGTGGTCCCATCTGA	NA	circbase	NA	NA	NA	NA	NA	NA	NA	NA	NA	NA	NA	hsa_circ_0020236	chr10	123298052	123298229	-	177	177	NM_022970	FGFR2
hsa_circ_0017884	3.6662	P	1.62417	A	4.11825	4.11825	up	circRNA	GGAAAAACTCGTTATCAACGAAACTTCTCAGCATCACGATGACCTTGAATAAAAATTGCA	NA	circbase	NA	NA	NA	NA	NA	NA	NA	NA	NA	NA	NA	hsa_circ_0017884	chr10	17279228	17279592	+	364	364	NM_003380	VIM
hsa_circ_0009717	4.34839	P	5.94708	P	0.330177	3.02868	down	circRNA	TGCATCAGAAGAATCGAGTCACTGGCATTTACGAACTCAGCTTATGCAAAATGTCAGACA	NA	circbase	NA	NA	NA	NA	NA	NA	NA	NA	NA	NA	NA	hsa_circ_0009717	chr1	10423340	10441661	+	18321	6163	NM_015074	KIF1B
hsa_circ_0073121	2.04347	A	4.05702	P	0.247662	4.03776	down	circRNA	TAGCCCTCATAACTAACCATCCACCAGAGAAGGAAACCACAGTGCAAATTTAATTGCCGG	NA	circbase	NA	NA	NA	NA	NA	NA	NA	NA	NA	NA	NA	hsa_circ_0073121	chr5	78260238	78281381	-	21143	1000	NM_198709	ARSB
hsa_circ_0027868	2.61951	A	6.50726	P	0.0675571	14.8023	down	circRNA	CTGAGTATTGAAAACAATCTTAATCTTAATCAGGAGCTCTGTCTAAACATCATTCCAACC	NA	circbase	NA	NA	NA	NA	NA	NA	NA	NA	NA	NA	NA	hsa_circ_0027868	chr12	100717302	100723097	+	5795	366	NM_017988	SCYL2
hsa_circ_0077676	2.29006	A	3.7412	P	0.365734	2.73423	down	circRNA	ACCAGAAGTGTTGCCAGCAAGGGGATGCCCAGCAGCGCCTGGGGCAGTCTAGACTGATCA	NA	circbase	NA	NA	NA	NA	NA	NA	NA	NA	NA	NA	NA	hsa_circ_0077676	chr6	112465995	112469538	-	3543	320	NM_001105206	LAMA4
hsa_circ_0014421	3.06558	A	4.16656	P	0.466197	2.14501	down	circRNA	ATGGACCACCTTAATAGTAACTGCATCAAGACCTCCAAGTACAATATTCTCACCTTCCTG	NA	circbase	NA	NA	NA	NA	NA	NA	NA	NA	NA	NA	NA	hsa_circ_0014421	chr1	154303290	154316044	+	12754	1668	NM_020452	ATP8B2
hsa_circ_0071243	3.98163	P	2.85598	A	2.18201	2.18201	up	circRNA	TATGCATGAGGCTATTGCATTACCTCCTATAGCCAAATGGCCATACCAGAATGGTTTTAC	NA	circbase	NA	NA	NA	NA	NA	NA	NA	NA	NA	NA	NA	hsa_circ_0071243	chr4	151817545	151837890	-	20345	1422	NM_001199282	LRBA
hsa_circ_0061436	3.61757	P	4.94287	P	0.399065	2.50586	down	circRNA	ATCGTGCTCATGAAGCACCTGAGGTGGATCGTGGCCGACTCCATTTCAGCAGCTCTGGAA	NA	circbase	NA	NA	NA	NA	NA	NA	NA	NA	NA	NA	NA	hsa_circ_0061436	chr21	33691526	33717065	-	25539	1722	NM_014825	URB1
hsa_circ_0063018	4.13437	P	2.44228	A	3.23126	3.23126	up	circRNA	AGCTTCGAAGAGAGTATTATGAGGGAGGCCGAGGACTTCATGCTCCGGACAGAGAAACGG	NA	circbase	NA	NA	NA	NA	NA	NA	NA	NA	NA	NA	NA	hsa_circ_0063018	chr22	34157357	34157545	-	188	188	NM_004737	LARGE
hsa_circ_0045077	5.66509	P	12.096	P	0.0115903	86.2794	down	circRNA	TGTCTGAAAGGCACTGCAGATCTTCATAAAATGTATCCTACACCACCATCATTGGAACAA	NA	circbase	NA	NA	NA	NA	NA	NA	NA	NA	NA	NA	NA	hsa_circ_0045077	chr17	60042366	60062226	-	19860	2368	NM_005121	MED13
hsa_circ_0017878	3.68188	P	2.51983	A	2.23775	2.23775	up	circRNA	ATAAATCTTTGGAAAAACTCTTTGCTGACCTCTCTGAGGCTGCCAACCGGAACAATGACG	NA	circbase	NA	NA	NA	NA	NA	NA	NA	NA	NA	NA	NA	hsa_circ_0017878	chr10	17276691	17279592	+	2901	841	NM_003380	VIM
hsa_circ_0057584	1.11862	A	3.57313	P	0.182439	5.48128	down	circRNA	AATCACTCACTCAGATGAGAATTCTCCAGCCAACTTCTGGGATTCTAAGAACAGGGGTGT	NA	circbase	NA	NA	NA	NA	NA	NA	NA	NA	NA	NA	NA	hsa_circ_0057584	chr2	197135916	197208488	-	72572	3043	NM_020760	HECW2
hsa_circ_0060936	5.95741	P	4.21714	P	3.34099	3.34099	up	circRNA	ATATGCCGTATTTAAAAGCCTGTCTGAAAGAATCTATGAGGGAAGGGGAAGACTGGCAGC	NA	circbase	NA	NA	NA	NA	NA	NA	NA	NA	NA	NA	NA	hsa_circ_0060936	chr20	52775495	52788209	-	12714	708	NM_000782	CYP24A1
hsa_circ_0076692	2.73446	A	4.12624	P	0.381092	2.62404	down	circRNA	AGCCAGGCAGGGCACAGACAGAAGCTTGATGACTCTAAACCTAGTTTGTTCTCTGACCGC	NA	circbase	NA	NA	NA	NA	NA	NA	NA	NA	NA	NA	NA	hsa_circ_0076692	chr6	45459677	45513019	+	53342	402	NM_004348	RUNX2
hsa_circ_0078213	3.89157	P	2.81153	A	2.1141	2.1141	up	circRNA	CTGCCGCTGACTAGTTGTGTGATCTTGAACAAATTTTTTCTTTTTCTTTGTGAAGAATGA	NA	circbase	NA	NA	NA	NA	NA	NA	NA	NA	NA	NA	NA	hsa_circ_0078213	chr6	149899957	149902317	+	2360	898	NM_138785	C6orf72
hsa_circ_0061865	6.47807	P	8.20804	P	0.301457	3.31722	down	circRNA	CAGATCCAGTCACGCCCTCGGGGTCGGTCCTCGAGGACGCGCAGGGCCCCCCACCCACCA	NA	circbase	NA	NA	NA	NA	NA	NA	NA	NA	NA	NA	NA	hsa_circ_0061865	chr21	44476912	44496472	-	19560	1774	NM_001178008	CBS
hsa_circ_0049098	4.43412	P	3.06353	A	2.58575	2.58575	up	circRNA	TCGCACTAAGCCGGGGTGGTCAGCGAGGAGCCATTCACACTGAACTTCACCATCAACAAC	NA	circbase	NA	NA	NA	NA	NA	NA	NA	NA	NA	NA	NA	hsa_circ_0049098	chr19	8987044	8987334	-	290	193	NM_024690	MUC16
hsa_circ_0002973	5.71467	P	3.77223	P	3.84354	3.84354	up	circRNA	TATCTGGGATGGGGTGAAAGATATCCCTACCTACCTGGGACTGGCCAGCCAGTTCAGGCT	NA	circbase	NA	NA	NA	NA	NA	NA	NA	NA	NA	NA	NA	hsa_circ_0002973	chr6	43146617	43146800	-	183	183	NM_003131	SRF
hsa_circ_0067705	6.77707	P	5.36613	P	2.6591	2.6591	up	circRNA	CTGAGGGCCAATGCTTTCTTCTGTATTGGCTGCTCTCATTGGAATTGCAGGATCTGGCTA	NA	circbase	NA	NA	NA	NA	NA	NA	NA	NA	NA	NA	NA	hsa_circ_0067705	chr3	149093229	149093375	-	146	146	NM_014220	TM4SF1
hsa_circ_0083667	5.32225	P	7.2101	P	0.270209	3.70084	down	circRNA	TGCTCAGAAAGAGACCTGGTATTGGCACGGAGATGTCAACAGCAACAAAGTGGTCATGAG	NA	circbase	NA	NA	NA	NA	NA	NA	NA	NA	NA	NA	NA	hsa_circ_0083667	chr8	23174461	23174627	-	166	166	NM_002318	LOXL2
hsa_circ_0056528	5.68695	P	4.64659	P	2.05674	2.05674	up	circRNA	TCTGAGAGAGGTGCATGCTCCGAGTCCTTGATTCATTTGGTACTGAACCCGAATTTAATC	NA	circbase	NA	NA	NA	NA	NA	NA	NA	NA	NA	NA	NA	hsa_circ_0056528	chr2	135107375	135170586	+	63211	565	NM_002410	MGAT5
hsa_circ_0047346	3.73522	P	1.76365	A	3.92195	3.92195	up	circRNA	ACATGTATATGTGGCAGTTCTCATTCCTTTCCGTAATCGCCATGAACATCTTCCAATTTT	NA	circbase	NA	NA	NA	NA	NA	NA	NA	NA	NA	NA	NA	hsa_circ_0047346	chr18	29210921	29218723	-	7802	305	NM_004775	B4GALT6
hsa_circ_0053299	1.25757	A	3.88782	P	0.161516	6.19133	down	circRNA	TTTAATTTTAAATTGCGGAAGTTTCTCTACCCATGCGGTGTCTCTATGGTCGGGTGGGTG	NA	circbase	NA	NA	NA	NA	NA	NA	NA	NA	NA	NA	NA	hsa_circ_0053299	chr2	27851862	27873713	+	21851	1834	NM_007266	GPN1
hsa_circ_0088259	5.21777	P	1.09898	A	17.3732	17.3732	up	circRNA	TGTACGCTTCACCCTTCATGGGAGACAATTATTGTGATGCCATCAACAACCGAGCCTTTT	NA	circbase	NA	NA	NA	NA	NA	NA	NA	NA	NA	NA	NA	hsa_circ_0088259	chr9	119144673	119164600	+	19927	5912	NM_002581	PAPPA
hsa_circ_0068216	3.67311	P	4.69049	P	0.494011	2.02424	down	circRNA	AGCCGCTGAGTAATGGCAACGTTGCAGCTACCAGCCACTAATTTGGCCAACTTGGCAAAT	NA	circbase	NA	NA	NA	NA	NA	NA	NA	NA	NA	NA	NA	hsa_circ_0068216	chr3	183491420	183521123	+	29703	1376	NM_018023	YEATS2
hsa_circ_0035202	3.98862	P	2.97092	A	2.02469	2.02469	up	circRNA	AGTAAATGTTTATGGAGTGCATGTGCCAGAAACCAAATGACCGTGATCATAAAGTGAGAC	NA	circbase	NA	NA	NA	NA	NA	NA	NA	NA	NA	NA	NA	hsa_circ_0035202	chr15	50515161	50521239	+	6078	583	NM_003645	SLC27A2
hsa_circ_0060224	8.14737	P	6.98724	P	2.23477	2.23477	up	circRNA	AGATTCATTGTTCCTTGGGGGAGAGGAAGAAGCTGCTTAGTTATATCCAGCGATTGGTTC	NA	circbase	NA	NA	NA	NA	NA	NA	NA	NA	NA	NA	NA	hsa_circ_0060224	chr20	35547766	35569514	-	21748	577	NM_015474	SAMHD1
hsa_circ_0075307	3.53754	P	1.20557	A	5.03492	5.03492	up	circRNA	CCACAGCAGGTTGGACAGTTCACAGCATCTTCATGATACAGTTAAGAGGAATCTTGACAG	NA	circbase	NA	NA	NA	NA	NA	NA	NA	NA	NA	NA	NA	hsa_circ_0075307	chr5	179192326	179198244	+	5918	1753	NM_014757	MAML1
hsa_circ_0008822	4.62274	P	1.37485	A	9.49978	9.49978	up	circRNA	CTCATTGCAGTTGAGCATTTTTGTCATCTGCAAATAATTTTAGCCAGGTGGCAAGTGTAT	NA	circbase	NA	NA	NA	NA	NA	NA	NA	NA	NA	NA	NA	hsa_circ_0008822	chr19	52364156	52390165	-	26009	668	NR_024181	ZNF577
hsa_circ_0050262	6.34384	P	5.05351	P	2.44585	2.44585	up	circRNA	GCCCCGAGAAGAGTACGACCCCAGCAAAGCGACCTTTGTGAAGGTGGTGCCAACCCCCAA	NA	circbase	NA	NA	NA	NA	NA	NA	NA	NA	NA	NA	NA	hsa_circ_0050262	chr19	19757013	19770796	-	13783	2852	NM_020410	ATP13A1
hsa_circ_0043546	9.05749	P	8.04206	P	2.0215	2.0215	up	circRNA	CTTCCCCAAAGTGCTTTTTGACCACGTAGGCTGTTTAAAGAAATATGACACGGTGTTGGA	NA	circbase	NA	NA	NA	NA	NA	NA	NA	NA	NA	NA	NA	hsa_circ_0043546	chr17	38548469	38556319	-	7850	1088	NM_001067	TOP2A
hsa_circ_0065115	4.47161	P	12.1109	M	0.00501568	199.375	down	circRNA	ATCTGGACAGAGGACCACGGTGGACCCACGGGAGAAGCTGGAGGTGCTGGAGAGGACATA	NA	circbase	NA	NA	NA	NA	NA	NA	NA	NA	NA	NA	NA	hsa_circ_0065115	chr3	46710484	46713523	-	3039	2317	NR_033815	ALS2CL
hsa_circ_0045151	6.34859	P	4.86449	P	2.79741	2.79741	up	circRNA	AGCCCTCAAGACCAGCCGGACAACCCCAGTGAGGAGAACTGTGGAGTGATCCGCACTGAG	NA	circbase	NA	NA	NA	NA	NA	NA	NA	NA	NA	NA	NA	hsa_circ_0045151	chr17	60744750	60757814	+	13064	1500	NM_006039	MRC2
hsa_circ_0024288	1.9156	A	4.64903	P	0.150367	6.65038	down	circRNA	GTTATGGAGACGCAGAAGAAACAAGAAAGAAAGATTATAATCCAAAGTCGTCTGGATCAG	NA	circbase	NA	NA	NA	NA	NA	NA	NA	NA	NA	NA	NA	hsa_circ_0024288	chr11	111857594	111866288	+	8694	681	NM_001037954	DIXDC1
hsa_circ_0090156	4.23979	P	3.17597	A	2.09046	2.09046	up	circRNA	ACGTGGTTGGGTTTTTATGATAAGTTCATTTTGCTTCTGGACTTCAACAGTCTATATCCT	NA	circbase	NA	NA	NA	NA	NA	NA	NA	NA	NA	NA	NA	hsa_circ_0090156	chrX	24763534	24844718	+	81184	1170	NM_016937	POLA1
hsa_circ_0001826	3.51538	P	2.25537	A	2.39498	2.39498	up	circRNA	ACACCATCAAAGAGAAATTATTCCGACACTTGTTAAAATGGCACGCACAGAGGCTGGGCT	NA	circbase	NA	NA	NA	NA	NA	NA	NA	NA	NA	NA	NA	hsa_circ_0001826	chr8	141357855	141370292	-	12437	12437	NM_031466	TRAPPC9
hsa_circ_0008186	5.5428	P	11.7927	M	0.01314	76.1036	down	circRNA	TTGGGGAGCGGATAAACATCACGATGCTGCTCATGAAATCATCGAGACCATCCGATGGGT	NA	circbase	NA	NA	NA	NA	NA	NA	NA	NA	NA	NA	NA	hsa_circ_0008186	chr19	2180711	2191239	+	10528	412	NM_032482	DOT1L
hsa_circ_0014228	3.50356	P	2.16542	A	2.52825	2.52825	up	circRNA	CAAGTTCAATAAAGATTCTTGGAAGTTTTGAATCCTGACTGCTGTCATGGCGTGCCCTCT	NA	circbase	NA	NA	NA	NA	NA	NA	NA	NA	NA	NA	NA	hsa_circ_0014228	chr1	153516094	153517285	-	1191	461	NM_019554	S100A4
hsa_circ_0073164	4.38044	P	3.1688	A	2.31601	2.31601	up	circRNA	TGTGCCTATGCTCAGGCATTTGAAAGGATGATGAGTCCAACTGGTTCTAATCTTAAGTCT	NA	circbase	NA	NA	NA	NA	NA	NA	NA	NA	NA	NA	NA	hsa_circ_0073164	chr5	79738941	79741224	+	2283	305	NM_001105251	ZFYVE16
hsa_circ_0065033	4.35472	P	3.24992	A	2.15069	2.15069	up	circRNA	AATGCAGGAGGACCATCTGAATCTGATAATTTTTCTCATAACCTGAGAGGAGTAATCCCA	NA	circbase	NA	NA	NA	NA	NA	NA	NA	NA	NA	NA	NA	hsa_circ_0065033	chr3	44826336	44853781	+	27445	1916	NM_020242	KIF15
hsa_circ_0061973	3.60171	P	1.66928	A	3.817	3.817	up	circRNA	ACTTTTTTGAATGGGAGGCATTGATCATAATTAACACTGAATCCTCCGGAAGGAATTGTA	NA	circbase	NA	NA	NA	NA	NA	NA	NA	NA	NA	NA	NA	hsa_circ_0061973	chr21	46207834	46208010	-	176	82	NM_182688	UBE2G2
hsa_circ_0085996	3.51418	P	2.43319	A	2.11548	2.11548	up	circRNA	TTACCCTGTGCGCTTGGCGTGGGAACAGCAGGAGCCAGGCGAGAGGAAGCTGAGCTTTTT	NA	circbase	NA	NA	NA	NA	NA	NA	NA	NA	NA	NA	NA	hsa_circ_0085996	chr8	145317005	145319045	-	2040	2040	---	---
hsa_circ_0056654	5.03879	P	3.89364	P	2.2117	2.2117	up	circRNA	TAGTTTAGAGGGTTGTTATGTTGGCTTTGATCTAGCACATGCAGTTGGAAATGTTGAACT	NA	circbase	NA	NA	NA	NA	NA	NA	NA	NA	NA	NA	NA	hsa_circ_0056654	chr2	143742652	143790890	+	48238	312	NM_001199241	KYNU
hsa_circ_0026585	3.41792	P	2.33193	A	2.12283	2.12283	up	circRNA	ATTTGTATATCTTCTTACACCAGTAATTTGGCCTACAGCTTCTATAGTCACAAGCTCTAT	NA	circbase	NA	NA	NA	NA	NA	NA	NA	NA	NA	NA	NA	hsa_circ_0026585	chr12	53666504	53686441	+	19937	4627	NM_012291	ESPL1
hsa_circ_0027299	2.84341	A	3.91704	P	0.47512	2.10473	down	circRNA	AGAAGGCCAACATGGACAATGGAAATGCCACAGATATCAATGACAATAGCCAAACCCGTC	NA	circbase	NA	NA	NA	NA	NA	NA	NA	NA	NA	NA	NA	hsa_circ_0027299	chr12	57975197	57976412	+	1215	265	NM_004984	KIF5A
hsa_circ_0006520	4.5332	P	3.4789	A	2.07671	2.07671	up	circRNA	CTGTTATTTCCCTATCGATTTTACCCCTTGGTACACCTGATACTGTTCTATGAGAACCGG	NA	circbase	NA	NA	NA	NA	NA	NA	NA	NA	NA	NA	NA	hsa_circ_0006520	chr10	99236439	99238146	-	1707	422	NM_022362	MMS19
hsa_circ_0047254	3.17151	A	4.42695	P	0.418866	2.3874	down	circRNA	CTTGTAGAAGTTCTTTTAAAGCAGATCTCTGGGACAGATGGAGAGGGAAACAACGTGCCT	NA	circbase	NA	NA	NA	NA	NA	NA	NA	NA	NA	NA	NA	hsa_circ_0047254	chr18	21479251	21495386	+	16135	1942	NM_198129	LAMA3
hsa_circ_0011557	7.66822	M	1.2451	A	85.813	85.813	up	circRNA	CACATACCCAAAACAAAGAATGCCAGACAGGCAAGTACTCAAACAGATGCCCTGAAACTG	NA	circbase	NA	NA	NA	NA	NA	NA	NA	NA	NA	NA	NA	hsa_circ_0011557	chr1	35859195	35859340	+	145	145	NM_005095	ZMYM4
hsa_circ_0018633	5.5568	P	3.54847	P	4.02315	4.02315	up	circRNA	CCTAAGCATTTTAATAAAAAGTTAAAACAAGGCTGCTTCCAACCTTCAATTTGTAAAAAA	NA	circbase	NA	NA	NA	NA	NA	NA	NA	NA	NA	NA	NA	hsa_circ_0018633	chr10	71909960	71922515	-	12555	2954	NM_001142648	SAR1A
hsa_circ_0035744	5.28372	P	3.65024	P	3.1026	3.1026	up	circRNA	GTGTATGAAGATTGAAGCTGGACAGTACTGCACTTTTGTCATTTCTACGGATGGCTCTGT	NA	circbase	NA	NA	NA	NA	NA	NA	NA	NA	NA	NA	NA	hsa_circ_0035744	chr15	63953171	64048947	-	95776	8002	NM_003922	HERC1
hsa_circ_0070429	1.68503	A	4.83892	P	0.112354	8.90047	down	circRNA	AGCAGGGATGAATTGATGAACATTTTAAAACGAGTCCCAAAATCCCTGGGATTGACCTGA	NA	circbase	NA	NA	NA	NA	NA	NA	NA	NA	NA	NA	NA	hsa_circ_0070429	chr4	89588527	89591403	+	2876	580	NM_014606	HERC3
hsa_circ_0046739	6.77724	P	5.76009	P	2.02392	2.02392	up	circRNA	TAGTATCACGGTTATAGTTGAAGTCCTGCCTAATCAACCTGTGAAGTTAGTACCTAAAAT	NA	circbase	NA	NA	NA	NA	NA	NA	NA	NA	NA	NA	NA	hsa_circ_0046739	chr18	2762102	2762234	+	132	132	NM_015295	SMCHD1
hsa_circ_0049640	11.3269	P	12.3577	P	0.48944	2.04315	down	circRNA	CAAGCCTGAGGTTTGCAGACAAGCCAGGATGCACGCTTTTATGCTCTGTCGGCCAGTTTC	NA	circbase	NA	NA	NA	NA	NA	NA	NA	NA	NA	NA	NA	hsa_circ_0049640	chr19	13050241	13051266	+	1025	509	NM_004343	CALR
hsa_circ_0026839	2.59961	A	3.6929	P	0.468692	2.1336	down	circRNA	ATCTTACATTAAACATCATACTCAAACCAGCCCATTGCGCATCATTGGAGTCAAGGTTCA	NA	circbase	NA	NA	NA	NA	NA	NA	NA	NA	NA	NA	NA	hsa_circ_0026839	chr12	56524823	56538460	+	13637	3592	NM_001184796	ESYT1
hsa_circ_0060925	6.22811	P	4.97381	P	2.3855	2.3855	up	circRNA	ATAATACGCCTCAGGTATCTGCCTCGTGTTGTATGAGAAGAGATTTGGGCTTCTCCAGAA	NA	circbase	NA	NA	NA	NA	NA	NA	NA	NA	NA	NA	NA	hsa_circ_0060925	chr20	52773707	52782372	-	8665	915	NM_000782	CYP24A1
hsa_circ_0016434	6.00913	P	4.42336	P	3.00169	3.00169	up	circRNA	CATTCAACAGAGGTTGGAGCAATCACTGAAGAAACTGAAGCCTGTGATTGGTGGAGTTTG	NA	circbase	NA	NA	NA	NA	NA	NA	NA	NA	NA	NA	NA	hsa_circ_0016434	chr1	213434900	213436159	+	1259	179	NM_012424	RPS6KC1
hsa_circ_0031708	5.79714	P	4.38752	P	2.65666	2.65666	up	circRNA	TCATGGTGAGTTTATGTTTCATTTAAGAAGATCTTCTTTCCTGCAAGTTTTTAACAATAG	NA	circbase	NA	NA	NA	NA	NA	NA	NA	NA	NA	NA	NA	hsa_circ_0031708	chr14	39511989	39514528	-	2539	249	NM_006364	SEC23A
hsa_circ_0031907	3.11231	A	4.1577	P	0.484516	2.06392	down	circRNA	GAATCTCTGAACATCATCATAAATCTATGAAACCCACGTAGTCGAACACCGTGATGCTTC	NA	circbase	NA	NA	NA	NA	NA	NA	NA	NA	NA	NA	NA	hsa_circ_0031907	chr14	52156408	52156653	+	245	245	NM_001042481	FRMD6
hsa_circ_0002399	6.73654	P	5.11835	P	3.0699	3.0699	up	circRNA	CTTCACAAAGGTTCTTTTTTATATTTCTCCAGTGAATAAATTGGTGGGTGCACTGATGAC	NA	circbase	NA	NA	NA	NA	NA	NA	NA	NA	NA	NA	NA	hsa_circ_0002399	chr7	32598170	32599076	+	906	606	NM_015060	AVL9
hsa_circ_0067184	6.30524	P	7.32148	P	0.494401	2.02265	down	circRNA	TCTCTCGGAATAAGACAGAGGTCCTTGCTGCGAAAGTGCTCAACCTTGTGCTGCCAAACT	NA	circbase	NA	NA	NA	NA	NA	NA	NA	NA	NA	NA	NA	hsa_circ_0067184	chr3	127429418	127429508	-	90	90	NM_007283	MGLL
hsa_circ_0060919	3.58159	P	1.89142	A	3.22696	3.22696	up	circRNA	TTTTGGAAAAAGGACATAGTTGACGGCAAGGAAAAAGAAGGACAAGAACTTGGAACTGCG	NA	circbase	NA	NA	NA	NA	NA	NA	NA	NA	NA	NA	NA	hsa_circ_0060919	chr20	52601825	52612589	-	10764	417	NM_003657	BCAS1
hsa_circ_0069723	1.17059	A	5.36374	P	0.0546686	18.292	down	circRNA	ATCTATATGATTCTCAAAGCAGTGTCAATGCTTAAATCTCTTCAAGCTCAGGAGGATGCC	NA	circbase	NA	NA	NA	NA	NA	NA	NA	NA	NA	NA	NA	hsa_circ_0069723	chr4	52938082	52945059	+	6977	661	NM_145263	SPATA18
hsa_circ_0025207	4.1986	P	1.97069	A	4.68454	4.68454	up	circRNA	AAACCCGGGAGAAGGAGTATCAGGAGACCATTGACCAGATAGAGGTCCCATCCATGGGGG	NA	circbase	NA	NA	NA	NA	NA	NA	NA	NA	NA	NA	NA	hsa_circ_0025207	chr12	6657230	6657991	-	761	375	NR_036467	IFFO1
hsa_circ_0031478	2.19242	A	15.5679	M	9.40994e-05	10627.1	down	circRNA	GCAGAATATTCCTTATATGTGTATTGAGAGTGAGAACACTTGGAGAGATTTAATGAAGAC	NA	circbase	NA	NA	NA	NA	NA	NA	NA	NA	NA	NA	NA	hsa_circ_0031478	chr14	31596990	31613463	-	16473	2350	NM_015382	HECTD1
hsa_circ_0001779	1.12353	A	3.88967	P	0.146998	6.80282	down	circRNA	GGTCTTGAAGGTGGGGACCACGGGACACTGGAACTGCCTTGGTGTGTTTATTTCCAAATA	NA	circbase	NA	NA	NA	NA	NA	NA	NA	NA	NA	NA	NA	hsa_circ_0001779	chr8	10980998	10981370	-	372	372	NM_173683	XKR6
hsa_circ_0065123	1.92324	A	4.92593	P	0.124767	8.01491	down	circRNA	CCACTCATGCGCCTGCGCGATGCAAGACGGGAGAAAAGGAGGGGCGTACGCGGGCAAGAT	NA	circbase	NA	NA	NA	NA	NA	NA	NA	NA	NA	NA	NA	hsa_circ_0065123	chr3	46966409	47018270	-	51861	828	NM_144716	CCDC12
hsa_circ_0035504	6.5725	P	4.94664	P	3.08626	3.08626	up	circRNA	ATCAAAGAAGGCACAGTATGAAAACCCACCACATATCTATGCCCTTGCAGATAATATGTA	NA	circbase	NA	NA	NA	NA	NA	NA	NA	NA	NA	NA	NA	hsa_circ_0035504	chr15	59430396	59548577	-	118181	3013	NM_004998	MYO1E
hsa_circ_0074017	3.95216	P	2.83022	A	2.17639	2.17639	up	circRNA	GCGAGCGGAAGATTTACTTGGCAATTGAAAATTGTGATTGAAGAAGAAAAGAAATTCTTG	NA	circbase	NA	NA	NA	NA	NA	NA	NA	NA	NA	NA	NA	hsa_circ_0074017	chr5	134131677	134154694	+	23017	1183	NM_014829	DDX46
hsa_circ_0079774	3.08742	A	4.24324	P	0.448809	2.22812	down	circRNA	ACACTGCAATTAGGTAGAAGAAGCTCTGATCCAGATCCATGATCCAGAACTCAGGAAGCT	NA	circbase	NA	NA	NA	NA	NA	NA	NA	NA	NA	NA	NA	hsa_circ_0079774	chr7	32612810	32613030	+	220	220	NM_015060	AVL9
hsa_circ_0080935	2.95074	A	4.1183	P	0.445174	2.24631	down	circRNA	GGATGCATTGCAACAATTGTGTTAAATGAACTCAACTGGACAAGTGCCTTAGATGAAGTT	NA	circbase	NA	NA	NA	NA	NA	NA	NA	NA	NA	NA	NA	hsa_circ_0080935	chr7	81641469	81714216	-	72747	836	NM_000722	CACNA2D1
hsa_circ_0082213	2.51529	A	5.28672	P	0.146459	6.82784	down	circRNA	ACAAGCACGTGCCTGAGGTGGCTGTGGGACAGGAACAAGCATTCTCTGTGAACACACGAG	NA	circbase	NA	NA	NA	NA	NA	NA	NA	NA	NA	NA	NA	hsa_circ_0082213	chr7	128484057	128493675	+	9618	3432	NM_001458	FLNC
hsa_circ_0004646	4.12584	P	8.99691	M	0.0341713	29.2643	down	circRNA	TGCTGGAGAAGACTTTTCCAGATTTCTCAGAATAAAGTAGCAGTTCTTCTTCTAGCTGGT	NA	circbase	NA	NA	NA	NA	NA	NA	NA	NA	NA	NA	NA	hsa_circ_0004646	chr1	162546566	162567648	+	21082	1145	NM_003115	UAP1
hsa_circ_0069438	2.63656	A	4.11087	P	0.359907	2.7785	down	circRNA	GTTCTTTCAGTTCTTATCAGGAGAGGATCAATGGAAGTGAAAGCAAATGATTTTCATTCA	NA	circbase	NA	NA	NA	NA	NA	NA	NA	NA	NA	NA	NA	hsa_circ_0069438	chr4	38987955	38995618	-	7663	465	NM_024943	TMEM156
hsa_circ_0025076	2.69202	A	4.52036	P	0.28159	3.55126	down	circRNA	GGACTTGGAGCCAGGCTCCTTCTCTATAAAGTGGGATCTATCATGACCAGCCTACCTTAT	NA	circbase	NA	NA	NA	NA	NA	NA	NA	NA	NA	NA	NA	hsa_circ_0025076	chr12	6030205	6055398	-	25193	594	NM_020373	ANO2
hsa_circ_0046833	4.48381	P	7.37287	P	0.134991	7.40791	down	circRNA	ATTTCACACCAGAAAACTATAAGGGAAGACATGTAAGGAATTTGCATAAGACAGTTATGC	NA	circbase	NA	NA	NA	NA	NA	NA	NA	NA	NA	NA	NA	hsa_circ_0046833	chr18	9117835	9119386	+	1551	129	NM_021074	NDUFV2
hsa_circ_0060212	3.98881	P	2.94934	A	2.05547	2.05547	up	circRNA	GCTGGAGAAGCAGGACAACAGCTGGAAGGAGGTGAACAGCATGAAGGAGCTGTACTTGCT	NA	circbase	NA	NA	NA	NA	NA	NA	NA	NA	NA	NA	NA	hsa_circ_0060212	chr20	35425904	35434360	-	8456	597	NM_080627	KIAA0889
hsa_circ_0019448	5.19167	P	1.23753	A	15.4994	15.4994	up	circRNA	GGGAGAAATGGAAAATGTCCACGGGCACATCACCATCAAGGAAGATGTTGAAAAGAAAAA	NA	circbase	NA	NA	NA	NA	NA	NA	NA	NA	NA	NA	NA	hsa_circ_0019448	chr10	101558963	101572901	+	13938	1227	NM_000392	ABCC2
hsa_circ_0037985	3.36616	P	2.01123	A	2.55785	2.55785	up	circRNA	TTTTGGAGAATCTGGTCGAGAAGTGAACTGAAGATCTTAAGGAGCCTACGTGGAAGCAGT	NA	circbase	NA	NA	NA	NA	NA	NA	NA	NA	NA	NA	NA	hsa_circ_0037985	chr16	14758725	14758928	+	203	203	NM_016561	BFAR
hsa_circ_0050778	2.68188	A	3.83422	P	0.449894	2.22274	down	circRNA	AGCTCCTATGAGGGTGCTAGAAGTCGGACCGGAAGTGGAAGTGGTCCCCGAAGGCTATTT	NA	circbase	NA	NA	NA	NA	NA	NA	NA	NA	NA	NA	NA	hsa_circ_0050778	chr19	37697941	37701451	-	3510	324	NM_152279	ZNF585B
hsa_circ_0027182	2.51779	A	3.7223	P	0.433915	2.3046	down	circRNA	AACCAGTTTGTGGATTGTGAGGACGCCTCAGATGAGATGAACTGCACCACGAGGCCCCCT	NA	circbase	NA	NA	NA	NA	NA	NA	NA	NA	NA	NA	NA	hsa_circ_0027182	chr12	57566950	57587795	+	20845	4755	NM_002332	LRP1
hsa_circ_0085656	6.67492	P	7.78542	P	0.463132	2.15921	down	circRNA	TCGATTTGCTGAGCAGGACATCGAGACTTTACATGGCTCTGTTCACGTCACGCTGTGTGG	NA	circbase	NA	NA	NA	NA	NA	NA	NA	NA	NA	NA	NA	hsa_circ_0085656	chr8	134270608	134276895	-	6287	351	NM_001135242	NDRG1
hsa_circ_0076280	4.57755	P	12.4395	M	0.00429859	232.635	down	circRNA	AAATTTGGGGAGTTACTGAAGAAACACTTAAATTCTGGAAATAGCGACTCAGTATCATGG	NA	circbase	NA	NA	NA	NA	NA	NA	NA	NA	NA	NA	NA	hsa_circ_0076280	chr6	41034530	41039414	-	4884	1043	NM_145063	C6orf130
hsa_circ_0017974	5.23083	P	4.22251	P	2.01157	2.01157	up	circRNA	AAGAAGTTGTGAGAGAGGATGCAAGCCATGGAGAAACAGATTGCCAGTTTAACTGGCCTT	NA	circbase	NA	NA	NA	NA	NA	NA	NA	NA	NA	NA	NA	hsa_circ_0017974	chr10	24783428	24802363	+	18935	498	NM_019590	KIAA1217
hsa_circ_0037846	2.67718	A	4.56321	P	0.270552	3.69615	down	circRNA	TCAAGACTGATGATGTCCTGGATCTGAATGGGAAGATCCGGCTGGCGACGCTGGAGCTGA	NA	circbase	NA	NA	NA	NA	NA	NA	NA	NA	NA	NA	NA	hsa_circ_0037846	chr16	11136110	11154879	+	18769	456	NM_015226	CLEC16A
hsa_circ_0077700	3.46733	P	5.12213	P	0.31758	3.14881	down	circRNA	TAATTGCCCAGAATAAAGATCTCTTTGTCCTTACCTATGGAGCTCTGGTTGCCCAGCTGT	NA	circbase	NA	NA	NA	NA	NA	NA	NA	NA	NA	NA	NA	hsa_circ_0077700	chr6	116861525	116864563	-	3038	198	NM_001139444	BET3L
hsa_circ_0030845	1.12481	A	7.04844	P	0.0164744	60.7001	down	circRNA	TTACCTGGGAACCCAGGTGTGCAGGGCCAGAAGGGCCCTCAAGGTACACCAGGGCTGATA	NA	circbase	NA	NA	NA	NA	NA	NA	NA	NA	NA	NA	NA	hsa_circ_0030845	chr13	110833638	110839676	-	6038	657	NM_001845	COL4A1
hsa_circ_0080931	3.1917	A	4.24176	P	0.482947	2.07062	down	circRNA	CAGGCCAGATAGCAATGAAGTTGTCTACTACAATGCAAAGGATGATCTCGATCCTGAGAA	NA	circbase	NA	NA	NA	NA	NA	NA	NA	NA	NA	NA	NA	hsa_circ_0080931	chr7	81613950	81765992	-	152042	1519	NM_000722	CACNA2D1
hsa_circ_0031443	5.22136	P	4.14215	P	2.11288	2.11288	up	circRNA	GCAGAGGAAGGGGCCAACAGGACAAAACTCTACGACATGATAGCTGATCTGGGAGATGAT	NA	circbase	NA	NA	NA	NA	NA	NA	NA	NA	NA	NA	NA	hsa_circ_0031443	chr14	31388171	31388312	-	141	141	NM_001083893	STRN3
hsa_circ_0034334	3.08674	A	4.26596	P	0.44159	2.26454	down	circRNA	GGAAAAACAGGTTGACAATGGTCTCCAGGATGGTCTCTACCATGCTATCTGGCCTACTGT	NA	circbase	NA	NA	NA	NA	NA	NA	NA	NA	NA	NA	NA	hsa_circ_0034334	chr15	32935786	32972116	+	36330	383	NM_001144757	SCG5
hsa_circ_0029598	3.43154	P	6.02582	P	0.165594	6.03888	down	circRNA	CCAGGGTTGATGGCTCAGGAGGCCTTCTCTGCAGGGGACCAGGACACAGGATTACCAGGA	NA	circbase	NA	NA	NA	NA	NA	NA	NA	NA	NA	NA	NA	hsa_circ_0029598	chr13	19648268	19687941	-	39673	456	TCONS_l2_00007482	TCONS_l2_00007482
hsa_circ_0056286	2.65367	A	3.66566	P	0.495861	2.01669	down	circRNA	AATAAAAAAGCAGACAAATAGAGTGTTCTTTGACCTAATGAGAGAAATCAGAACAAAGAA	NA	circbase	NA	NA	NA	NA	NA	NA	NA	NA	NA	NA	NA	hsa_circ_0056286	chr2	121050716	121052286	+	1570	1570	NM_002881	RALB
hsa_circ_0027789	6.12008	P	3.23593	A	7.38271	7.38271	up	circRNA	CTACACTCAGGTCCATGGGAAGTGTATGTGTAAGCACAACACAGCAGGCAGCCACTGCCA	NA	circbase	NA	NA	NA	NA	NA	NA	NA	NA	NA	NA	NA	hsa_circ_0027789	chr12	96076482	96107116	-	30634	646	NM_021229	NTN4
hsa_circ_0027360	6.44215	P	5.18556	P	2.38931	2.38931	up	circRNA	TATAAGATTTGATGATAGGCAGCTTAGGCTAGATGGTGGTTGCCGAAGAAGCCTGGGAAA	NA	circbase	NA	NA	NA	NA	NA	NA	NA	NA	NA	NA	NA	hsa_circ_0027360	chr12	62777858	62785209	+	7351	985	NM_001252078	USP15
hsa_circ_0026388	4.33486	P	5.50218	P	0.445249	2.24593	down	circRNA	TGGAATGTGTCTATTAAATGCATGTGTCACCTGGTGAGGTTCTTGGAGCAGCAGAACAAG	NA	circbase	NA	NA	NA	NA	NA	NA	NA	NA	NA	NA	NA	hsa_circ_0026388	chr12	52817853	52827036	-	9183	1605	NM_004693	KRT75
hsa_circ_0073432	3.54634	P	1.87555	A	3.18387	3.18387	up	circRNA	TACCTCATCTTCAGTCAAAAGCCTGAATTTCAGGATCTTTCAGGTCCATCCACATCGTGG	NA	circbase	NA	NA	NA	NA	NA	NA	NA	NA	NA	NA	NA	hsa_circ_0073432	chr5	95067562	95124562	+	57000	1718	NM_014899	RHOBTB3
hsa_circ_0073071	4.09197	P	2.12442	A	3.91102	3.91102	up	circRNA	CCTGAAGTTGGTGTCAGTAAGATTATTTTTATCAGACGTACTACAATGACGTTAGTCTTC	NA	circbase	NA	NA	NA	NA	NA	NA	NA	NA	NA	NA	NA	hsa_circ_0073071	chr5	76331365	76344812	+	13447	1052	NM_018046	AGGF1
hsa_circ_0042493	6.83444	P	5.7402	P	2.13501	2.13501	up	circRNA	AAAGATGATGTCTCTTGCATGGCACCAAGAATGTTACCAATTCAAGCAGTTTAAGATTGC	NA	circbase	NA	NA	NA	NA	NA	NA	NA	NA	NA	NA	NA	hsa_circ_0042493	chr17	25630392	25631937	+	1545	401	NM_015626	WSB1
hsa_circ_0043298	3.42986	A	12.1494	M	0.00237228	421.535	down	circRNA	GCCTCACACAGTGTACCAGAAGCAGGAAACGATTTGAACAGCAGCAAAAACTCTTAGAAG	NA	circbase	NA	NA	NA	NA	NA	NA	NA	NA	NA	NA	NA	hsa_circ_0043298	chr17	35939227	35945538	-	6311	5746	NM_007247	SYNRG
hsa_circ_0026008	5.07532	P	1.12257	A	15.4845	15.4845	up	circRNA	GAAAAAAATCTGAACAATAAATGTTTTATTTGCTTTAAGTGTTGCTCTGGGAACAGCAGC	NA	circbase	NA	NA	NA	NA	NA	NA	NA	NA	NA	NA	NA	hsa_circ_0026008	chr12	48176506	48187371	-	10865	2635	NM_015401	HDAC7
hsa_circ_0063391	4.21449	P	2.77277	A	2.71644	2.71644	up	circRNA	AGAAGATAATATTAATAATAAAAACAGCTACAAAGTCTGAAGAGCGGCCGCGCCGGGTCC	NA	circbase	NA	NA	NA	NA	NA	NA	NA	NA	NA	NA	NA	hsa_circ_0063391	chr22	39853324	39888199	+	34875	5086	NM_002409	MGAT3
hsa_circ_0007636	6.72667	P	1.18133	A	46.6997	46.6997	up	circRNA	CTGCATCTTTGCAGGGGTATGTTTTATCACAGTGTTAAAAAGTACTGCTTATCATTTGTT	NA	circbase	NA	NA	NA	NA	NA	NA	NA	NA	NA	NA	NA	hsa_circ_0007636	chr1	145919046	147458431	+	1539385	1460827	NM_004326	BCL9
hsa_circ_0022551	3.71765	P	2.62841	A	2.12761	2.12761	up	circRNA	ATAATAAAATGATTGATTACATACTGCCTGGCCAGGGCGACTGGCGGATAAGGTCTTGTG	NA	circbase	NA	NA	NA	NA	NA	NA	NA	NA	NA	NA	NA	hsa_circ_0022551	chr11	62619459	62623217	-	3758	1373	NR_003098	SNHG1
hsa_circ_0069450	3.6546	P	1.50535	A	4.43596	4.43596	up	circRNA	ACTTACCTGGCGTATTTTCTCACTGCTAGAAAAGACTTGGCTTGGCGCACCAATACAGTT	NA	circbase	NA	NA	NA	NA	NA	NA	NA	NA	NA	NA	NA	hsa_circ_0069450	chr4	39187345	39188224	+	879	158	NM_025132	WDR19
hsa_circ_0072686	3.48999	P	1.28923	A	4.59722	4.59722	up	circRNA	TTATTACTAGGTTGCCAAACTTTACCGTGATTCCAGCCTAGGAAACGTTGTGAATATTAT	NA	circbase	NA	NA	NA	NA	NA	NA	NA	NA	NA	NA	NA	hsa_circ_0072686	chr5	64747301	64748043	-	742	230	NM_197941	ADAMTS6
hsa_circ_0083879	3.77011	P	2.438	A	2.51771	2.51771	up	circRNA	ACTGCCAATGAGGTAAATACCGGATTGTATACGTAACTCCAGAATACTGTTCAGGTAACA	NA	circbase	NA	NA	NA	NA	NA	NA	NA	NA	NA	NA	NA	hsa_circ_0083879	chr8	30954283	30958471	+	4188	190	NM_000553	WRN
hsa_circ_0055800	4.41718	P	3.29189	A	2.18145	2.18145	up	circRNA	AAATCTGAGAATATTGCATCCCTTGGAGAGAGTTTGGCAATGAAAAGTCGCGGGGATGAG	NA	circbase	NA	NA	NA	NA	NA	NA	NA	NA	NA	NA	NA	hsa_circ_0055800	chr2	99695121	99757612	-	62491	15475	NM_025244	TSGA10
hsa_circ_0078068	4.20925	P	3.13362	A	2.10764	2.10764	up	circRNA	GACAGTCCCGGTGAAAGATGTCATGAAGGATGTCATGTCGGACCTGCAGCAGACGAACAG	NA	circbase	NA	NA	NA	NA	NA	NA	NA	NA	NA	NA	NA	hsa_circ_0078068	chr6	144747422	144758882	+	11460	836	NM_007124	UTRN
hsa_circ_0041029	3.60718	P	1.43377	A	4.51088	4.51088	up	circRNA	ATACTGAACGATTTTGTACAGCAGCAATTTCTTACTCTCTCTGCAAGTTTTCTTCCCAGT	NA	circbase	NA	NA	NA	NA	NA	NA	NA	NA	NA	NA	NA	hsa_circ_0041029	chr16	89828356	89833645	-	5289	348	NM_000135	FANCA
hsa_circ_0021487	5.08837	P	7.86827	M	0.145601	6.86807	down	circRNA	GCTTTGACCACCCAGCTGACAGCAAATTGCATCATCCAAGGACTCATCTCAAAGCAAAAT	NA	circbase	NA	NA	NA	NA	NA	NA	NA	NA	NA	NA	NA	hsa_circ_0021487	chr11	19905839	20089944	+	184105	4381	NM_001244963	NAV2
hsa_circ_0002641	1.11529	A	4.65819	P	0.0857983	11.6552	down	circRNA	TTCTCTAAAGGAAAGCACTATCAAGAAAGACTAATGGAGTGACTATCAAAAGGAAGTCAA	NA	circbase	NA	NA	NA	NA	NA	NA	NA	NA	NA	NA	NA	hsa_circ_0002641	chr10	31662050	31676195	+	14145	14145	NM_001128128	ZEB1
hsa_circ_0046736	4.86109	P	3.81714	P	2.06186	2.06186	up	circRNA	TGAAATCATGGAAAACACACAGAGTATAAGTGTAAGAGGCATCAAATTTATTCCAGGTCC	NA	circbase	NA	NA	NA	NA	NA	NA	NA	NA	NA	NA	NA	hsa_circ_0046736	chr18	2743758	2763787	+	20029	1086	NM_015295	SMCHD1
hsa_circ_0003805	5.23868	P	4.23461	P	2.00565	2.00565	up	circRNA	AAACAACAAGGAGCCACCAGAAATGGAACTATTGAAATTTTTCAGGCCAGAAAACATTAC	NA	circbase	NA	NA	NA	NA	NA	NA	NA	NA	NA	NA	NA	hsa_circ_0003805	chr18	29412046	29419420	-	7374	236	NM_014939	TRAPPC8
hsa_circ_0066964	2.11411	A	4.16266	P	0.241727	4.1369	down	circRNA	CCCAGATGTTTATAATGAGGGCACACAGGAAGAGAGAAAAGCTGCTGATAACAAAATTAA	NA	circbase	NA	NA	NA	NA	NA	NA	NA	NA	NA	NA	NA	hsa_circ_0066964	chr3	121433707	121448187	-	14480	1140	NM_004487	GOLGB1
hsa_circ_0048644	2.50158	A	3.78681	P	0.410305	2.43721	down	circRNA	TAAAACTCTGTTTACAACCACCTGAACCACTATCCCGTGTTTGTGGGCAGCGGGCCCGGA	NA	circbase	NA	NA	NA	NA	NA	NA	NA	NA	NA	NA	NA	hsa_circ_0048644	chr19	4542605	4558161	-	15556	3553	NM_032108	SEMA6B
hsa_circ_0013287	3.79458	P	2.54315	A	2.38076	2.38076	up	circRNA	AAAGAAAAGGAGCAATGTTGTGTTTCTCTAGCTGCAGCTGTCTACGGCAGCTATTCCAGA	NA	circbase	NA	NA	NA	NA	NA	NA	NA	NA	NA	NA	NA	hsa_circ_0013287	chr1	100316044	100358163	+	42119	3737	NM_000028	AGL
hsa_circ_0045270	1.81772	A	3.53382	P	0.304371	3.28546	down	circRNA	TTGACTGCTTGCACCCAGAGAAGCACGTATGTGGAGCAGAAGGACTTTGCGCATCTCGGC	NA	circbase	NA	NA	NA	NA	NA	NA	NA	NA	NA	NA	NA	hsa_circ_0045270	chr17	62126414	62130731	-	4317	448	NM_001433	ERN1
hsa_circ_0030261	2.63785	A	3.73689	P	0.466827	2.14212	down	circRNA	TGAAAATCAGAGATGTCGGCTTATTTATAGGAATTGCTTGAAGCCAGAGTCATGGTGGAT	NA	circbase	NA	NA	NA	NA	NA	NA	NA	NA	NA	NA	NA	hsa_circ_0030261	chr13	50118872	50141456	-	22584	1213	NM_018191	RCBTB1
hsa_circ_0066078	5.98989	P	4.60683	P	2.60822	2.60822	up	circRNA	TGTATTCTCGGAAAAAGAAGATGTCCCTGTGGAAATGTCCAATGGTGAACCAGGTTGCCA	NA	circbase	NA	NA	NA	NA	NA	NA	NA	NA	NA	NA	NA	hsa_circ_0066078	chr3	52610556	52613215	-	2659	304	NM_018313	PBRM1
hsa_circ_0023856	1.65131	A	4.01888	P	0.193773	5.16069	down	circRNA	TGCATTCTGCTATTCCATGGCTTTTCGTGTGGACAAATCGGGAGGTGGTGTAAACTGGTT	NA	circbase	NA	NA	NA	NA	NA	NA	NA	NA	NA	NA	NA	hsa_circ_0023856	chr11	82904508	82904681	-	173	173	---	---
hsa_circ_0085060	3.61256	P	2.42247	A	2.28167	2.28167	up	circRNA	CTATCTTAAGCTCACAGAAATGCAAGTTGAGAGTAGTTATTACAGTCCACAGAAAGTAAA	NA	circbase	NA	NA	NA	NA	NA	NA	NA	NA	NA	NA	NA	hsa_circ_0085060	chr8	100146859	100168971	+	22112	1002	NM_017890	VPS13B
hsa_circ_0001193	3.9702	P	2.73005	A	2.36223	2.36223	up	circRNA	CCTGATAATGGTGACAGATTCCGCTCTATTATTGATGATGCTTGGTGGTTTGGAACAGTG	NA	circbase	NA	NA	NA	NA	NA	NA	NA	NA	NA	NA	NA	hsa_circ_0001193	chr21	40596333	40597123	-	790	174	NM_033656	BRWD1
hsa_circ_0074290	6.87441	P	5.58685	P	2.44116	2.44116	up	circRNA	TAAAATTGGTTAACTTGCTAGGTTGAAGTCAAAAGACCAAAATACTAATCACTAGTTACA	NA	circbase	NA	NA	NA	NA	NA	NA	NA	NA	NA	NA	NA	hsa_circ_0074290	chr5	140041886	140042065	+	179	179	NM_006083	IK
hsa_circ_0080284	1.88715	A	3.52073	P	0.322287	3.10282	down	circRNA	AGGTGGACATGATGAAGAGAGGGGAGCTCTTTGACTACCTCACTGAGAAGGTCACCTTGA	NA	circbase	NA	NA	NA	NA	NA	NA	NA	NA	NA	NA	NA	hsa_circ_0080284	chr7	56149855	56151408	-	1553	321	NM_006213	PHKG1
hsa_circ_0016770	4.74273	P	3.5288	A	2.31969	2.31969	up	circRNA	TGCACGTGCTGCAGACAGACCCACCCCAGGCTGACTACAGAGGCTGCACCTCAGCAAACA	NA	circbase	NA	NA	NA	NA	NA	NA	NA	NA	NA	NA	NA	hsa_circ_0016770	chr1	228332403	228335245	+	2842	442	NM_001159391	GUK1
hsa_circ_0069756	3.34362	P	4.35085	P	0.497499	2.01005	down	circRNA	GTGGCTCCCACAACATCAGAGCTGGATCTAGAAATGGAAGCTCTTAAAACCGTGTATAAG	NA	circbase	NA	NA	NA	NA	NA	NA	NA	NA	NA	NA	NA	hsa_circ_0069756	chr4	55131085	55139897	+	8812	930	NM_006206	PDGFRA
hsa_circ_0054541	10.8069	P	4.66737	P	70.4988	70.4988	up	circRNA	GCATAGAAAGGTGAGAAATAAGGCTCAGCAAACATTTTTTGCTGCCTTGGGAGCATATAA	NA	circbase	NA	NA	NA	NA	NA	NA	NA	NA	NA	NA	NA	hsa_circ_0054541	chr2	54093221	54131293	-	38072	2593	NM_014614	PSME4
hsa_circ_0007358	4.97813	P	6.10405	P	0.458209	2.18241	down	circRNA	TAAGACAGAGTTGGCCACGGACAGAGCGAAGGGGAGAGGATGGTAGTGTCTGACTTCCAC	NA	circbase	NA	NA	NA	NA	NA	NA	NA	NA	NA	NA	NA	hsa_circ_0007358	chr3	127429418	127441409	-	11991	338	NM_007283	MGLL
hsa_circ_0006392	4.61852	P	3.60577	P	2.01775	2.01775	up	circRNA	CAACTGGACGGAGGACATGGAAGGAGATGCAGAGCAAAGCGGCAGTCCCCGGACAGGGAT	NA	circbase	NA	NA	NA	NA	NA	NA	NA	NA	NA	NA	NA	hsa_circ_0006392	chr19	3425103	3435205	+	10102	396	NM_205843	NFIC
hsa_circ_0047629	3.06066	A	4.28058	P	0.429307	2.32933	down	circRNA	CCTCAGGGAGGATGAAGTGGCCGTGGAGACGACCACTCCCCAGCAGAACAAGATGGACAA	NA	circbase	NA	NA	NA	NA	NA	NA	NA	NA	NA	NA	NA	hsa_circ_0047629	chr18	46287760	46343747	+	55987	456	NM_001142397	CTIF
hsa_circ_0077408	5.34285	P	4.29234	P	2.07126	2.07126	up	circRNA	AGATGAAATGCTTTTTCCACCGTCATGGCATTTATTACATCTCCACTTGGATATACATTG	NA	circbase	NA	NA	NA	NA	NA	NA	NA	NA	NA	NA	NA	hsa_circ_0077408	chr6	97702432	97717868	-	15436	513	NM_198468	MMS22L
hsa_circ_0065036	4.69287	P	3.60631	P	2.12366	2.12366	up	circRNA	GCTTGCTGAGGATTCCCTTGGAGGTAATGCCAAAACAGCCATAATTGCAAATGTTCATCC	NA	circbase	NA	NA	NA	NA	NA	NA	NA	NA	NA	NA	NA	hsa_circ_0065036	chr3	44839325	44893831	+	54506	3129	NM_020242	KIF15
hsa_circ_0021421	5.47222	P	4.07566	P	2.63273	2.63273	up	circRNA	AAAGGCAGAGAAATGGCAAGTTCCAATCCTGTGTATATGGAGATGGAAAAAGGAGATCTA	NA	circbase	NA	NA	NA	NA	NA	NA	NA	NA	NA	NA	NA	hsa_circ_0021421	chr11	18303496	18309560	-	6064	889	NM_181507	HPS5
hsa_circ_0086233	1.11028	A	4.05133	P	0.130214	7.67968	down	circRNA	TTTCTGCTAAAATGGTCTTTCTACAGAGACCATCATGCAGACATCAGAGACTGGGTCGGA	NA	circbase	NA	NA	NA	NA	NA	NA	NA	NA	NA	NA	NA	hsa_circ_0086233	chr9	3256990	3395596	-	138606	1822	NM_002919	RFX3
hsa_circ_0029108	4.97927	P	3.11071	A	3.65166	3.65166	up	circRNA	GTGACATTCAGAAAGCTTTTGAAGAAAGAAGATAAAACTGCTCTCATTTATTCTGATGGC	NA	circbase	NA	NA	NA	NA	NA	NA	NA	NA	NA	NA	NA	hsa_circ_0029108	chr12	123046467	123064524	+	18057	1426	NM_014708	KNTC1
hsa_circ_0052490	2.76028	A	4.42677	P	0.315019	3.17442	down	circRNA	TCGGACACAGTGCCTGAAACAGTATGTTGAGCTCTTGATCAAAGAAGGATTAGAAACCGC	NA	circbase	NA	NA	NA	NA	NA	NA	NA	NA	NA	NA	NA	hsa_circ_0052490	chr2	7154584	7170346	+	15762	612	NM_014746	RNF144A
hsa_circ_0005064	5.5312	P	10.9833	M	0.022843	43.777	down	circRNA	TTCCAGCTTTGGTTTAAGAAAATCTACGAAGAAACGCAGTGAGTCTCCACCTGCTGAGCT	NA	circbase	NA	NA	NA	NA	NA	NA	NA	NA	NA	NA	NA	hsa_circ_0005064	chr2	230683079	230705643	-	22564	554	NM_004238	TRIP12
hsa_circ_0000277	1.39713	A	5.19746	P	0.0717775	13.9319	down	circRNA	GCATTTCAAGATGATTCTTTGGGATTGGGACTTAAAACAATGGTATAAGCCTCATTATCA	NA	circbase	NA	NA	NA	NA	NA	NA	NA	NA	NA	NA	NA	hsa_circ_0000277	chr11	14793482	14810788	+	17306	437	NM_000922	PDE3B
hsa_circ_0029041	2.53043	A	3.75762	P	0.427147	2.34112	down	circRNA	GACTGCACTTTAAAAGGTGACCTTTTTGTCTTAAGAACTACGTTACTTTTAACCCAACAA	NA	circbase	NA	NA	NA	NA	NA	NA	NA	NA	NA	NA	NA	hsa_circ_0029041	chr12	122386889	122395174	+	8285	539	NM_144668	WDR66
hsa_circ_0067388	2.43333	A	3.88069	P	0.366691	2.72709	down	circRNA	GGATTTGAGAAAATCATTGATCACTCAGGAGATCCTGCAGAAGGAGTATATAAAACTTAT	NA	circbase	NA	NA	NA	NA	NA	NA	NA	NA	NA	NA	NA	hsa_circ_0067388	chr3	132423041	132424658	-	1617	249	NR_037804	NPHP3-ACAD11
hsa_circ_0007308	2.62663	A	3.74356	P	0.461074	2.16885	down	circRNA	CTTTGGCAATGTTTTCTTGGACGAATTTAGCTTGGGTTAAATCATATAACATCTGCTTTG	NA	circbase	NA	NA	NA	NA	NA	NA	NA	NA	NA	NA	NA	hsa_circ_0007308	chr4	39915230	39927553	-	12323	563	NM_001100399	PDS5A
hsa_circ_0022152	4.67877	P	6.41823	P	0.29948	3.33912	down	circRNA	TGAGACAAATGAACAGCAACAAAAGGTGGCAGAGACAGCTCTGTCTCCGTTGATATTCCT	NA	circbase	NA	NA	NA	NA	NA	NA	NA	NA	NA	NA	NA	hsa_circ_0022152	chr11	57259063	57268328	-	9265	666	NM_003627	SLC43A1
hsa_circ_0017322	4.53639	P	3.43058	A	2.1522	2.1522	up	circRNA	TCTATGAAGGACTTTGACTTTTTTAAAGAAATCAGGTCCATCACTCAATGAACTCATTCC	NA	circbase	NA	NA	NA	NA	NA	NA	NA	NA	NA	NA	NA	hsa_circ_0017322	chr1	247020992	247061638	-	40646	2762	NM_015446	AHCTF1
hsa_circ_0026611	3.90582	P	2.88139	A	2.03416	2.03416	up	circRNA	AGTTTTCCTTTTGTTTTCCACTCACCCGTTAGTCTTTTCTTCACTTCCGTTGAGTTCCGC	NA	circbase	NA	NA	NA	NA	NA	NA	NA	NA	NA	NA	NA	hsa_circ_0026611	chr12	53701239	53715412	-	14173	1837	NM_015665	AAAS
hsa_circ_0028502	3.57469	P	2.39256	A	2.26912	2.26912	up	circRNA	TCGGGGACCTAGATCCTCTCAGACTCCGAGGAGGACCGGGTATCTTCTAATACCAACAGC	NA	circbase	NA	NA	NA	NA	NA	NA	NA	NA	NA	NA	NA	hsa_circ_0028502	chr12	113753139	113754806	-	1667	333	NM_024959	SLC24A6
hsa_circ_0074910	3.40726	P	1.25226	A	4.4537	4.4537	up	circRNA	AGGGCTTCAGAACCCTCCATGGCAATGACATTTCCAGCGTTCCTGAAGGCTCCTTCAACG	NA	circbase	NA	NA	NA	NA	NA	NA	NA	NA	NA	NA	NA	hsa_circ_0074910	chr5	168113983	168139359	-	25376	831	NM_003062	SLIT3
hsa_circ_0031410	5.35865	P	1.14379	A	18.5695	18.5695	up	circRNA	AATATTTAACTTATATCTGCCTGTCAGCCAGGCTGCACGGTAGGACCGGGGCGAGGGGAG	NA	circbase	NA	NA	NA	NA	NA	NA	NA	NA	NA	NA	NA	hsa_circ_0031410	chr14	25443870	25519095	-	75225	869	NM_014178	STXBP6
hsa_circ_0071203	4.06908	P	5.44257	P	0.385956	2.59097	down	circRNA	GAAGGAACAAGCTATTGCATTACCTCCTATAGCCAAATGGCCATACCAGAATGGTTTTAC	NA	circbase	NA	NA	NA	NA	NA	NA	NA	NA	NA	NA	NA	hsa_circ_0071203	chr4	151727422	151837890	-	110468	4873	NM_001199282	LRBA
hsa_circ_0028983	4.73101	P	3.47851	A	2.38254	2.38254	up	circRNA	AAGACCGGGAAAGTTGGATCCATGCCGTCTACACCCCTGTAGACTCTTTGGTGTTCGGCG	NA	circbase	NA	NA	NA	NA	NA	NA	NA	NA	NA	NA	NA	hsa_circ_0028983	chr12	121882252	121958903	-	76651	1259	NM_032590	KDM2B
hsa_circ_0005275	7.19694	P	5.58114	P	3.06483	3.06483	up	circRNA	AGAAACTTCAAGTCCAGGCAGAATATAATTCTATAAAGGGAACTCCTTCAGAGGCTGAAA	NA	circbase	NA	NA	NA	NA	NA	NA	NA	NA	NA	NA	NA	hsa_circ_0005275	chr13	49742748	49749677	+	6929	493	NM_001079673	FNDC3A
hsa_circ_0036081	1.12454	A	5.41057	P	0.0512597	19.5085	down	circRNA	GCTACTCCAGGTTCTTTGCATGGAGGTTTGTGACTGCACTGTATATGACAGACATCAAGA	NA	circbase	NA	NA	NA	NA	NA	NA	NA	NA	NA	NA	NA	hsa_circ_0036081	chr15	69677015	69682119	+	5104	333	NM_001104554	PAQR5
hsa_circ_0007537	3.26847	A	4.32573	P	0.480543	2.08098	down	circRNA	AGTTCCAGATGAACCATAGCGTGCTTCAGTGATATCTCTGAGTCTCTGCTTGATAAGTGC	NA	circbase	NA	NA	NA	NA	NA	NA	NA	NA	NA	NA	NA	hsa_circ_0007537	chr1	26784281	26786635	+	2354	223	NM_024887	DHDDS
hsa_circ_0034160	2.57379	A	3.58951	P	0.494584	2.0219	down	circRNA	ATAGCCAAAAATGGCCCAGACACAGAAAGAGAGTTACAGTGGAGGTAAAAGGAGTGGCTT	NA	circbase	NA	NA	NA	NA	NA	NA	NA	NA	NA	NA	NA	hsa_circ_0034160	chr15	25585231	25653831	-	68600	2543	NM_000462	UBE3A
hsa_circ_0074596	2.05985	A	4.01585	P	0.257742	3.87985	down	circRNA	AGGAGAAAACCTGGACCAGGCACGGGAAGATGCCCAGTGAAGTGTATCCGGAGCACCCCG	NA	circbase	NA	NA	NA	NA	NA	NA	NA	NA	NA	NA	NA	hsa_circ_0074596	chr5	150496687	150510850	-	14163	836	NM_001155	ANXA6
hsa_circ_0051498	1.83483	A	6.22611	P	0.0476531	20.985	down	circRNA	TCAAAGCTAAGAACAGCTATGGAATGGTTAAAGACATCATTGCTTTTGGCTGTTTACAAG	NA	circbase	NA	NA	NA	NA	NA	NA	NA	NA	NA	NA	NA	hsa_circ_0051498	chr19	45989312	45996636	-	7324	742	NM_005619	RTN2
hsa_circ_0065112	4.15154	P	5.33589	P	0.440021	2.27262	down	circRNA	TGTCAAGTCTATCTCAGAGGTGCCACCATGGAGTCTGACCACTGCTGAGCAGACAGCCAC	NA	circbase	NA	NA	NA	NA	NA	NA	NA	NA	NA	NA	NA	hsa_circ_0065112	chr3	46021196	46026514	-	5318	400	NM_024513	FYCO1
hsa_circ_0009546	2.85385	A	9.78222	M	0.00821018	121.8	down	circRNA	CCACTGTAATCACCTAAATAAAGTGTTTATAAACATGAAGTGACGTCTTTGCCCCGCGCC	NA	circbase	NA	NA	NA	NA	NA	NA	NA	NA	NA	NA	NA	hsa_circ_0009546	chr1	7831328	7841492	+	10164	2205	NM_004781	VAMP3
hsa_circ_0088334	5.01336	P	3.92496	P	2.12638	2.12638	up	circRNA	AAACCTTCTTGACCTGCTTCACACCACCAAGCATCAGGATGTGTTGCTCAGTGAGCAGAC	NA	circbase	NA	NA	NA	NA	NA	NA	NA	NA	NA	NA	NA	hsa_circ_0088334	chr9	123929766	123932094	+	2328	621	NM_007018	CNTRL
hsa_circ_0076814	3.38589	P	2.36228	A	2.03299	2.03299	up	circRNA	CACACCCAAGGTTTTTGCCAATGAAGTAAATTCTCATCGTGAGCAGATAATAGAGCTGGA	NA	circbase	NA	NA	NA	NA	NA	NA	NA	NA	NA	NA	NA	hsa_circ_0076814	chr6	56328362	56357231	-	28869	2337	NM_015548	DST
hsa_circ_0036173	3.25614	P	1.90963	A	2.54296	2.54296	up	circRNA	ATTATTAGAGGCCTTTGGAAATGCAAAGACAGCTCATAATAACAATTCAAGTCGTTTTGG	NA	circbase	NA	NA	NA	NA	NA	NA	NA	NA	NA	NA	NA	hsa_circ_0036173	chr15	72300166	72324929	-	24763	540	NM_006901	MYO9A
hsa_circ_0024928	4.69622	P	3.5716	A	2.18044	2.18044	up	circRNA	AAGGGGATTGTCCAGGGAGAAGCAGTGGGGAGCTGTGGCACTCAGACTCCCCCTTCTCAC	NA	circbase	NA	NA	NA	NA	NA	NA	NA	NA	NA	NA	NA	hsa_circ_0024928	chr11	134216283	134229035	+	12752	1219	NM_138342	GLB1L2
hsa_circ_0090177	2.76739	A	3.91625	P	0.450981	2.21739	down	circRNA	TTCCCTAGTTCAAGAGGAAGAAATACCCCTGGAAAGCCAATGAGAGAGTGGATCTCTTGA	NA	circbase	NA	NA	NA	NA	NA	NA	NA	NA	NA	NA	NA	hsa_circ_0090177	chrX	31144758	31227816	-	83058	1685	NM_004010	DMD
hsa_circ_0027106	6.33372	P	8.78917	P	0.18232	5.48486	down	circRNA	ACTGCCAAAGTGGCTGCATTTCCTTTGGAAAGTGCTGACCCTGCCGGGGTGGCTCCCACA	NA	circbase	NA	NA	NA	NA	NA	NA	NA	NA	NA	NA	NA	hsa_circ_0027106	chr12	57113320	57113380	-	60	60	NM_001113203	NACA
hsa_circ_0060922	6.8126	P	4.98944	P	3.53855	3.53855	up	circRNA	TACGCCTCAGACAGCAAACAGTCTAATGTGGATTCTCTACAATTTATCCCGTAATCCCCA	NA	circbase	NA	NA	NA	NA	NA	NA	NA	NA	NA	NA	NA	hsa_circ_0060922	chr20	52773707	52775662	-	1955	565	NM_000782	CYP24A1
hsa_circ_0035743	4.85234	P	6.57116	P	0.303798	3.29166	down	circRNA	GTGTATGAAGATAATGAAGTTTATGCCTGGGGCAATAACTCAATGGGGCAATGTGGTCAG	NA	circbase	NA	NA	NA	NA	NA	NA	NA	NA	NA	NA	NA	hsa_circ_0035743	chr15	63953171	64041737	-	88566	7176	NM_003922	HERC1
hsa_circ_0069534	1.66363	A	6.16116	P	0.0442699	22.5887	down	circRNA	TGCCACAGCTTGAATTCAAACTAAAGAACTTAAATAAACAGTCCTTTGACCTTGCAAAAG	NA	circbase	NA	NA	NA	NA	NA	NA	NA	NA	NA	NA	NA	hsa_circ_0069534	chr4	39918667	39922019	-	3352	222	NM_001100399	PDS5A
hsa_circ_0027199	6.73263	P	3.66537	P	8.38179	8.38179	up	circRNA	TCCTACTGCAGCCTGGCTATTGACTTCCCTGAAAGCAAACTCTACTGGATCAGCTCCGGG	NA	circbase	NA	NA	NA	NA	NA	NA	NA	NA	NA	NA	NA	hsa_circ_0027199	chr12	57574112	57587087	+	12975	2448	NM_002332	LRP1
hsa_circ_0018338	6.25111	P	7.61041	P	0.389773	2.5656	down	circRNA	AGCTGAACAAGTTTTCAAACAAAAGACTATTACCAGTTGGATGGACACTAAAGGAATCAA	NA	circbase	NA	NA	NA	NA	NA	NA	NA	NA	NA	NA	NA	hsa_circ_0018338	chr10	51049995	51364771	-	314776	2324	NM_003631	PARG
hsa_circ_0056666	1.21309	A	12.1682	M	0.000503701	1985.31	down	circRNA	AATGGTACAGTGGTGAACTATGACAATGTAGTGGACACAGGTTCTGAAACAGATGAGGAA	NA	circbase	NA	NA	NA	NA	NA	NA	NA	NA	NA	NA	NA	hsa_circ_0056666	chr2	145182362	145187593	-	5231	330	NM_014795	ZEB2
hsa_circ_0077829	2.82284	A	3.93852	P	0.461475	2.16697	down	circRNA	CTGAAATCAGAACCCTTAGGAGAAATCTTGAGAGTGGACAGCAATTGTGAAGATCGCCAG	NA	circbase	NA	NA	NA	NA	NA	NA	NA	NA	NA	NA	NA	hsa_circ_0077829	chr6	130343371	130425720	+	82349	1980	NM_032438	L3MBTL3
hsa_circ_0084722	5.69884	P	1.10503	A	24.1476	24.1476	up	circRNA	TGACAAAGAGCCTTTTTTGGAAAATACCTCAATGAATATAATGGCAGCTACATCCCCCCT	NA	circbase	NA	NA	NA	NA	NA	NA	NA	NA	NA	NA	NA	hsa_circ_0084722	chr8	70498591	70539541	+	40950	1535	NM_001128205	SULF1
hsa_circ_0002109	4.75885	P	3.20405	A	2.93792	2.93792	up	circRNA	TCACCTCCAGAGGAATTAAGGAATTTGCAAGAGCAAATGAAGGCCTTACAAGAGCAGCTA	NA	circbase	NA	NA	NA	NA	NA	NA	NA	NA	NA	NA	NA	hsa_circ_0002109	chr10	13214375	13214765	+	390	246	NM_182751	MCM10
hsa_circ_0025665	4.66591	P	2.84377	A	3.53606	3.53606	up	circRNA	TGAAAATCAGGTTAGTGGATGACAGATGTGTGGTGCACCCAGAGGCCGGGGACCTTGCCA	NA	circbase	NA	NA	NA	NA	NA	NA	NA	NA	NA	NA	NA	hsa_circ_0025665	chr12	26636630	26943160	-	306530	5920	NM_002223	ITPR2
hsa_circ_0053766	8.42988	P	5.01348	P	10.6768	10.6768	up	circRNA	TTGTTTCTAAGTTCTTGCACGCATTGCAAATGCCACGAGGCCAACTATTCATCTGTGTGA	NA	circbase	NA	NA	NA	NA	NA	NA	NA	NA	NA	NA	NA	hsa_circ_0053766	chr2	32703702	32843965	+	140263	8500	NM_016252	BIRC6
hsa_circ_0017630	1.13248	A	3.63635	P	0.176303	5.67205	down	circRNA	CACCTGGAAGGTAATTTTTTCTGCAGGATGAATTAAGAGAAGAGACACTTGCTCATCAGG	NA	circbase	NA	NA	NA	NA	NA	NA	NA	NA	NA	NA	NA	hsa_circ_0017630	chr10	7262372	7423911	-	161539	1381	NM_001029880	SFMBT2
hsa_circ_0073276	3.6296	P	2.3515	A	2.4252	2.4252	up	circRNA	GCAAGAAGAGATATTGAAAGGTATAGTAAAAGATACATGAAGGTATACAAGGAAGAATGG	NA	circbase	NA	NA	NA	NA	NA	NA	NA	NA	NA	NA	NA	hsa_circ_0073276	chr5	89791493	89802491	+	10998	338	NM_006467	POLR3G
hsa_circ_0035282	3.37835	P	2.24077	A	2.20013	2.20013	up	circRNA	GCATGTTTAGGCACATACTGCAATTCTGCAAGTGCTTGCTTTGTTGCTTCTGATGGCAAA	NA	circbase	NA	NA	NA	NA	NA	NA	NA	NA	NA	NA	NA	hsa_circ_0035282	chr15	51799330	51827981	-	28651	450	NM_001174116	DMXL2
hsa_circ_0008075	6.27017	P	5.0853	P	2.27342	2.27342	up	circRNA	AATAATTAACTTCAAGACCCCAGAGGATGCCAGGAGCTACAGAGACTTCTGAAGTGGAGA	NA	circbase	NA	NA	NA	NA	NA	NA	NA	NA	NA	NA	NA	hsa_circ_0008075	chr9	79996891	80022523	+	25632	397	NM_033305	VPS13A
hsa_circ_0039561	1.10986	A	8.9881	P	0.00425023	235.281	down	circRNA	ATTCCAGCCAATGTTGAAAAGAATTTTAAAAGAAGGTAGACAGCTGACCTATGAGAAAGT	NA	circbase	NA	NA	NA	NA	NA	NA	NA	NA	NA	NA	NA	hsa_circ_0039561	chr16	57254643	57272947	+	18304	890	NM_133368	RSPRY1
hsa_circ_0006856	2.44143	A	10.5028	M	0.00374355	267.126	down	circRNA	GAGCTTCTTGATGTGCACTGGGAACTACACCTTTGTTCCTTACATGATAACTCCACATAA	NA	circbase	NA	NA	NA	NA	NA	NA	NA	NA	NA	NA	NA	hsa_circ_0006856	chr6	137015277	137019820	-	4543	641	NM_005923	MAP3K5
hsa_circ_0060418	10.5835	P	12.255	M	0.313927	3.18546	down	circRNA	TGAAGCACATTTTTACGGAGCAAGGAGCAAGGACCAACCCCAGTGGAGAAAAAGAAGAAA	NA	circbase	NA	NA	NA	NA	NA	NA	NA	NA	NA	NA	NA	hsa_circ_0060418	chr20	40126023	40143591	-	17568	538	NM_032221	CHD6
hsa_circ_0070553	4.27155	P	3.17492	A	2.13854	2.13854	up	circRNA	CTTTGTCCAGGAAATTCTCAAAGATTTCTCAGAAAGTGAGTTCCCTAGCATAAAGACTGA	NA	circbase	NA	NA	NA	NA	NA	NA	NA	NA	NA	NA	NA	hsa_circ_0070553	chr4	104029959	104054053	-	24094	1291	NM_001813	CENPE
hsa_circ_0021146	3.81991	P	2.50464	A	2.4885	2.4885	up	circRNA	ACTGTGGATGAAGCAGGCTAACCTCTGCTTTGTGGACATTGACAACCACTTCATTGAGTT	NA	circbase	NA	NA	NA	NA	NA	NA	NA	NA	NA	NA	NA	hsa_circ_0021146	chr11	9199678	9202631	-	2953	769	NM_015213	DENND5A
hsa_circ_0020634	2.73982	A	3.94895	P	0.432527	2.31199	down	circRNA	TTAGTTCTGAGGTCCTGCAGGCAGGGCTGGAGGTGGAGCGGCTCCGACTGCGGAATTTCT	NA	circbase	NA	NA	NA	NA	NA	NA	NA	NA	NA	NA	NA	hsa_circ_0020634	chr11	381668	382117	+	449	449	NM_178537	B4GALNT4
hsa_circ_0001091	1.78487	A	6.23608	P	0.0457145	21.8749	down	circRNA	CACAGAACCGGAAATCGCTGATAAAGATGGGAACAATAAAGTTCTGTCTTTCACTATCCC	NA	circbase	NA	NA	NA	NA	NA	NA	NA	NA	NA	NA	NA	hsa_circ_0001091	chr2	201873695	201876195	-	2500	197	NM_173822	FAM126B
hsa_circ_0057804	6.33786	P	4.91501	P	2.68114	2.68114	up	circRNA	AGTATACAGAGATGTTGGTCTCACATTGGAGATCCCCAAGAGTGTCACTATGAAGAATGT	NA	circbase	NA	NA	NA	NA	NA	NA	NA	NA	NA	NA	NA	hsa_circ_0057804	chr2	203332241	203421254	+	89013	2619	NM_001204	BMPR2
hsa_circ_0031501	7.07706	P	3.93425	P	8.83238	8.83238	up	circRNA	TTCATTATCAGTTTGCAGTGCCTGGATAGCAAGTGGAGTTGTAAGTGACCTTAATGATCT	NA	circbase	NA	NA	NA	NA	NA	NA	NA	NA	NA	NA	NA	hsa_circ_0031501	chr14	31760993	31785155	-	24162	3620	NM_015473	HEATR5A
hsa_circ_0028302	6.76338	P	8.39194	P	0.323411	3.09204	down	circRNA	TGTTTGGAGATGTGCAGGATGGCATGACCATCGCCAAGGAGGAGATTGGCTGCCGCGCGG	NA	circbase	NA	NA	NA	NA	NA	NA	NA	NA	NA	NA	NA	hsa_circ_0028302	chr12	112204690	112236046	+	31356	1344	NM_000690	ALDH2
hsa_circ_0068434	6.79499	P	4.59733	P	4.58736	4.58736	up	circRNA	ACCGGAAGAGGTTTTTCATATGAAAAAGATCCCCGATTATACTTTGACGACACTTGTGTT	NA	circbase	NA	NA	NA	NA	NA	NA	NA	NA	NA	NA	NA	hsa_circ_0068434	chr3	185774863	185775280	-	417	239	NM_004454	ETV5
hsa_circ_0044590	3.72152	P	2.33903	A	2.60718	2.60718	up	circRNA	AGCTGGATCACAGGGTGGAGTCTGTGTTCTTTGGTGGGGGGACCCCCAGTCTAGCCAGTC	NA	circbase	NA	NA	NA	NA	NA	NA	NA	NA	NA	NA	NA	hsa_circ_0044590	chr17	48557240	48561906	+	4666	942	NM_018346	RSAD1
hsa_circ_0069972	1.82093	A	3.69302	P	0.273179	3.66061	down	circRNA	CTAAACTTCATGGAAACAAGGAAAACTGATTAAGAGAAATGAGCACGCATGGAAAAGTTT	NA	circbase	NA	NA	NA	NA	NA	NA	NA	NA	NA	NA	NA	hsa_circ_0069972	chr4	74861358	74863372	-	2014	2014	NM_002994	CXCL5
hsa_circ_0032764	2.43721	A	3.96259	P	0.347388	2.87863	down	circRNA	TCATGGCTGCCATGCTGAGCATGGTCAAGTACAACTCTTGCGCCGACAGCGCCTCCTGCC	NA	circbase	NA	NA	NA	NA	NA	NA	NA	NA	NA	NA	NA	hsa_circ_0032764	chr14	77769177	77787225	-	18048	857	NM_013382	POMT2
hsa_circ_0001792	3.3735	P	1.69164	A	3.20842	3.20842	up	circRNA	TAGCCTCTCGGGAGATCATTCGCAAGGTGGTTCGACAGATAGACTTGTCCAGCGCCGATG	NA	circbase	NA	NA	NA	NA	NA	NA	NA	NA	NA	NA	NA	hsa_circ_0001792	chr8	41518947	41519459	-	512	201	NM_000037	ANK1
hsa_circ_0076396	4.37903	P	3.14251	A	2.35629	2.35629	up	circRNA	GCTGCTTCCTCCAAGAAATATTTTTAACAACATAATTTCAGAGTTCAAGGGACAAAGACA	NA	circbase	NA	NA	NA	NA	NA	NA	NA	NA	NA	NA	NA	hsa_circ_0076396	chr6	42626372	42631157	+	4785	646	NM_015255	UBR2
hsa_circ_0073629	4.66368	P	1.33558	A	10.0429	10.0429	up	circRNA	CTATTCATCATTGTTCATGGTGGACAATGGAGCAGATGACTGGAGAATAGCCATGACTTA	NA	circbase	NA	NA	NA	NA	NA	NA	NA	NA	NA	NA	NA	hsa_circ_0073629	chr5	113740134	113822874	+	82740	800	NM_021614	KCNN2
hsa_circ_0045186	3.68829	P	4.6997	P	0.496061	2.01588	down	circRNA	AGTGGCATCATTGACCTCAGCAATCACCCAGCGGATAAGTCCTTGTTCCACTCTGACTAG	NA	circbase	NA	NA	NA	NA	NA	NA	NA	NA	NA	NA	NA	hsa_circ_0045186	chr17	61278131	61278318	+	187	187	NM_025185	TANC2
hsa_circ_0072316	4.80624	P	3.6662	P	2.20388	2.20388	up	circRNA	GTTTCTACAAGTGTTAAAACAATTCCAGATGATACACCAATGTGCCGTATACTCCTTCGC	NA	circbase	NA	NA	NA	NA	NA	NA	NA	NA	NA	NA	NA	hsa_circ_0072316	chr5	38942934	38944671	-	1737	263	NM_152756	RICTOR
hsa_circ_0064983	4.09733	P	2.7569	A	2.53227	2.53227	up	circRNA	ATTTTTCTATAAAATACTTAGGCGGGAGCATCCAATCAACTTCGAGAGCGTAGGCCCCAC	NA	circbase	NA	NA	NA	NA	NA	NA	NA	NA	NA	NA	NA	hsa_circ_0064983	chr3	42632297	42636490	+	4193	815	NM_016305	SS18L2
hsa_circ_0006826	6.04898	P	3.93189	P	4.33821	4.33821	up	circRNA	GTGTGCACCTGGCAAGTCCATGAGCCTCATCGAGATCGGGAACCCCTCTCAGAGCCTGGA	NA	circbase	NA	NA	NA	NA	NA	NA	NA	NA	NA	NA	NA	hsa_circ_0006826	chr5	178579142	178585880	-	6738	654	NM_014244	ADAMTS2
hsa_circ_0077628	3.88997	P	2.30485	A	3.00031	3.00031	up	circRNA	CAGAGACTTGATTCCAGGAGGGCTTCGTGTATGGACCTCAAGCGTTGGAGGTAGCAGACT	NA	circbase	NA	NA	NA	NA	NA	NA	NA	NA	NA	NA	NA	hsa_circ_0077628	chr6	110988636	111095140	-	106504	28064	NM_015076	CDK19
hsa_circ_0014459	6.02497	P	7.4642	P	0.368765	2.71175	down	circRNA	CCCTGTCCAGGATGGCTGGCTTTGATGGCTCAGCATGGGATGAGGAGGAGGAAGAGCCAC	NA	circbase	NA	NA	NA	NA	NA	NA	NA	NA	NA	NA	NA	hsa_circ_0014459	chr1	154938637	154938993	-	356	269	NM_001130040	SHC1
hsa_circ_0030398	1.24934	A	3.74172	P	0.177713	5.62704	down	circRNA	CTGTAGGAGGAATGGATAACAACAAAGATATTGGCTGACCTAGAAAATCATGCATTATTT	NA	circbase	NA	NA	NA	NA	NA	NA	NA	NA	NA	NA	NA	hsa_circ_0030398	chr13	70413107	70413294	-	187	187	NM_020866	KLHL1
hsa_circ_0071333	3.31295	P	1.89179	A	2.678	2.678	up	circRNA	GTACAAATAATTGGTCATGTTCGGAGTTTGACCTGAATGAGATTCGCCTGATAGTTTACC	NA	circbase	NA	NA	NA	NA	NA	NA	NA	NA	NA	NA	NA	hsa_circ_0071333	chr4	159747067	159753290	+	6223	447	NM_020840	FNIP2
hsa_circ_0021580	4.80131	P	7.16292	P	0.194573	5.13946	down	circRNA	TAAACAAGAAGAGGCTTTAAAAACAGGAAAAGAACCTCCAGCTATTTGGAAAGTACAAAA	NA	circbase	NA	NA	NA	NA	NA	NA	NA	NA	NA	NA	NA	hsa_circ_0021580	chr11	32976841	33001814	+	24973	4889	NM_001076786	QSER1
hsa_circ_0035132	1.14687	A	5.39042	P	0.0527917	18.9424	down	circRNA	TAAAGGACAATTGGGTTGATGCTGCAACCCAATGTCTGTGGATCACGTTATAATGCTTAC	NA	circbase	NA	NA	NA	NA	NA	NA	NA	NA	NA	NA	NA	hsa_circ_0035132	chr15	48700502	48905289	-	204787	11136	NM_000138	FBN1
hsa_circ_0045457	4.77893	P	3.47076	P	2.47627	2.47627	up	circRNA	TCAAATTCAGGTATAGACTTCAGACAGTAAAGTCCTTAGCTGGAGTGAGCCTGATGTTAC	NA	circbase	NA	NA	NA	NA	NA	NA	NA	NA	NA	NA	NA	hsa_circ_0045457	chr17	65914829	65924717	+	9888	695	NM_182641	BPTF
hsa_circ_0008480	3.23852	A	4.72311	P	0.357351	2.79837	down	circRNA	CGGGGCGGAGAAATTCATTGAGTTTGAAGATGCTCTGGAACAAGAGAAGAAAGAGCTGCA	NA	circbase	NA	NA	NA	NA	NA	NA	NA	NA	NA	NA	NA	hsa_circ_0008480	chr16	1774557	1779579	+	5022	284	NM_015133	MAPK8IP3
hsa_circ_0026166	6.2398	P	2.72953	A	11.3945	11.3945	up	circRNA	GATGTTGGAGGTATGCAAGGAGCTGCACCGCTTTGAGAAGCTGATGGAGTATTTCCGGAA	NA	circbase	NA	NA	NA	NA	NA	NA	NA	NA	NA	NA	NA	hsa_circ_0026166	chr12	50043252	50048767	-	5515	1419	NM_175736	FMNL3
hsa_circ_0025831	3.3834	P	2.34414	A	2.05518	2.05518	up	circRNA	AGAACTTCCTCAAGAGTTTTGTACCAATGGCTAGAAGCAGATCGTCATGGCAAGAGCCAA	NA	circbase	NA	NA	NA	NA	NA	NA	NA	NA	NA	NA	NA	hsa_circ_0025831	chr12	31613127	31652605	-	39478	4717	NM_144973	DENND5B
hsa_circ_0067213	5.05651	P	13.2574	M	0.00339844	294.252	down	circRNA	AACAAATGGAAATAAAGCAGGGACTGTGAACATTGATCCAGCCGCAGAAGCCAGGATGAA	NA	circbase	NA	NA	NA	NA	NA	NA	NA	NA	NA	NA	NA	hsa_circ_0067213	chr3	128338812	128341252	-	2440	870	NM_002950	RPN1
hsa_circ_0080197	6.2285	P	1.10188	A	34.9354	34.9354	up	circRNA	TTCAGTGTCTTCTGCATGTCTGGAAAACCGGTATCACTGGGAATGCGCCACCGCTGGCTC	NA	circbase	NA	NA	NA	NA	NA	NA	NA	NA	NA	NA	NA	hsa_circ_0080197	chr7	47917086	47930361	-	13275	1210	NM_138295	PKD1L1
hsa_circ_0067179	3.28274	P	2.2055	A	2.11	2.11	up	circRNA	TCCTCTGCCACAAGTGGCGTCTAAGCCAGGCACGTGTGTGAAGGTGCTGACCATCGAGCC	NA	circbase	NA	NA	NA	NA	NA	NA	NA	NA	NA	NA	NA	hsa_circ_0067179	chr3	127396010	127396406	+	396	218	NM_032548	ABTB1
hsa_circ_0039008	5.69996	P	3.6683	P	4.08876	4.08876	up	circRNA	ACATCATCAACAGATAGCAGGCTTGGTGAGACGCTATGACCGTAATGAAATCACCATCTG	NA	circbase	NA	NA	NA	NA	NA	NA	NA	NA	NA	NA	NA	hsa_circ_0039008	chr16	30122708	30123542	-	834	224	NM_024307	GDPD3
hsa_circ_0029032	2.66271	A	3.80537	P	0.452922	2.20789	down	circRNA	TCTGGCAACCATCTCAGATGCTGAAGTCCAGTATTCCTGTGCACACAATATTTGACAGCT	NA	circbase	NA	NA	NA	NA	NA	NA	NA	NA	NA	NA	NA	hsa_circ_0029032	chr12	122380439	122380551	+	112	112	NM_144668	WDR66
hsa_circ_0045468	3.19237	A	6.4143	P	0.107178	9.33031	down	circRNA	TTCCTTACAGGTAATCACAGGGCCTCAGATTCGCCCTGGTATGACCGTGATTAGAACACC	NA	circbase	NA	NA	NA	NA	NA	NA	NA	NA	NA	NA	NA	hsa_circ_0045468	chr17	65928026	65960520	+	32494	2304	NM_182641	BPTF
hsa_circ_0073396	3.52419	P	2.26801	A	2.38861	2.38861	up	circRNA	TCATTGGCAGTTTCAGACCCAAAGTTTACGCCTATCAGACCTACACAGAAAATCGCATCT	NA	circbase	NA	NA	NA	NA	NA	NA	NA	NA	NA	NA	NA	hsa_circ_0073396	chr5	94244955	94248681	-	3726	302	NM_024717	MCTP1
hsa_circ_0026761	4.11732	P	5.25154	P	0.455583	2.19499	down	circRNA	AACCATCCAGTTTGACTTCCAGATCCTCAGAACGAGTCAGAATTTCGAGACAAACTCTCG	NA	circbase	NA	NA	NA	NA	NA	NA	NA	NA	NA	NA	NA	hsa_circ_0026761	chr12	54795559	54797108	-	1549	530	NM_002205	ITGA5
hsa_circ_0038672	7.46962	P	4.65831	P	7.01924	7.01924	up	circRNA	GCTGCTACAGGGTTACCAGGTGCCTGTTCTTGGAACCCCATCTTTGCTTGGACAGTCATT	NA	circbase	NA	NA	NA	NA	NA	NA	NA	NA	NA	NA	NA	hsa_circ_0038672	chr16	24574743	24576186	+	1443	203	NM_006910	RBBP6
hsa_circ_0046743	7.08161	P	6.05033	P	2.04383	2.04383	up	circRNA	GAACAAATAGGTTATAGTTGAAGTCCTGCCTAATCAACCTGTGAAGTTAGTACCTAAAAT	NA	circbase	NA	NA	NA	NA	NA	NA	NA	NA	NA	NA	NA	hsa_circ_0046743	chr18	2762102	2784619	+	22517	1285	NM_015295	SMCHD1
hsa_circ_0070159	4.39254	P	1.3158	A	8.43703	8.43703	up	circRNA	TTAGTTACCACCTATGACCTGAGAGGCATCTCAGGCAAAATACACACCCCTAGTCTTCAT	NA	circbase	NA	NA	NA	NA	NA	NA	NA	NA	NA	NA	NA	hsa_circ_0070159	chr4	79300879	79434706	+	133827	6882	NM_025074	FRAS1
hsa_circ_0017186	3.86351	P	1.82432	A	4.11015	4.11015	up	circRNA	ATGAGTTACAACAACAGTCTTTGAAAGCAGTCACACAGCAGGTTAACACCCTGCCTCCAT	NA	circbase	NA	NA	NA	NA	NA	NA	NA	NA	NA	NA	NA	hsa_circ_0017186	chr1	240979616	241307868	-	328252	46511	NM_002924	RGS7
hsa_circ_0070269	4.63953	P	3.59386	P	2.06433	2.06433	up	circRNA	TTTCTAAAAACTGATGTCCACTGCTTTTAAGGCCCTGCACTGAAAATGCAAGCTCAGGCG	NA	circbase	NA	NA	NA	NA	NA	NA	NA	NA	NA	NA	NA	hsa_circ_0070269	chr4	84015830	84029103	-	13273	386	NM_001130716	PLAC8
hsa_circ_0029005	6.2677	P	5.00307	P	2.40265	2.40265	up	circRNA	ATTCTCATCAGCAACGGCTCAAGGTGCAAACGCCATGCCAGTCGGGAGGAGGCGGAGCTC	NA	circbase	NA	NA	NA	NA	NA	NA	NA	NA	NA	NA	NA	hsa_circ_0029005	chr12	122186231	122199644	+	13413	363	NM_001080825	TMEM120B
hsa_circ_0077528	4.15517	P	2.65548	A	2.82781	2.82781	up	circRNA	TCCTCTCTTCGAATTTTCAAAATGAATTATACAGAGTCCAGCCCATTGAGAGAATCAACT	NA	circbase	NA	NA	NA	NA	NA	NA	NA	NA	NA	NA	NA	hsa_circ_0077528	chr6	105563560	105581463	-	17903	969	NM_001199563	BVES
hsa_circ_0050152	4.69681	P	6.19397	P	0.35425	2.82287	down	circRNA	ACCTGAACAGCCACATTGTAAATCACCTTGTGAGGGCAAAATGCAAAGAGGTGACCCTGC	NA	circbase	NA	NA	NA	NA	NA	NA	NA	NA	NA	NA	NA	hsa_circ_0050152	chr19	18960883	18971247	+	10364	1839	NM_002911	UPF1
hsa_circ_0073675	3.3457	P	2.2676	A	2.11125	2.11125	up	circRNA	CATTAATAATGTTAGAAGAATGACTTCTCATCCAACTCTTCCTTACTTTTCTTCACTAGT	NA	circbase	NA	NA	NA	NA	NA	NA	NA	NA	NA	NA	NA	hsa_circ_0073675	chr5	118525402	118560464	+	35062	1140	NM_005509	DMXL1
hsa_circ_0085818	4.20912	P	2.53707	A	3.18666	3.18666	up	circRNA	ATGGAGATAAATGATTTAAACCAGTGGAGCCTCTGAGGGGGAATCTGGTGAAGAAGGACT	NA	circbase	NA	NA	NA	NA	NA	NA	NA	NA	NA	NA	NA	hsa_circ_0085818	chr8	143866297	143866872	-	575	575	NM_003695	LY6D
hsa_circ_0035114	2.55101	A	3.74414	P	0.437355	2.28647	down	circRNA	GTCCTCACAGGTACTGGAGGCCACAGCTGCCCTGTACAACCAGGACTTATCCTGGCTAGA	NA	circbase	NA	NA	NA	NA	NA	NA	NA	NA	NA	NA	NA	hsa_circ_0035114	chr15	45433092	45444714	+	11622	2035	NM_017434	DUOX1
hsa_circ_0037062	4.92198	P	3.61207	P	2.47927	2.47927	up	circRNA	ATGCTGCCGTGTTTGTGACCAGGTTGGCCTCATTCAGCTTGGGCAGGAGCAGGTGCTAAT	NA	circbase	NA	NA	NA	NA	NA	NA	NA	NA	NA	NA	NA	hsa_circ_0037062	chr15	100801683	100871259	-	69576	581	NM_139057	ADAMTS17
hsa_circ_0045626	5.54776	P	2.57159	A	7.86896	7.86896	up	circRNA	TTTTCACTGTATCTCTAAAGAGAGACTGTCATGGGTCATTCCCCACAAGAGCCACATCCT	NA	circbase	NA	NA	NA	NA	NA	NA	NA	NA	NA	NA	NA	hsa_circ_0045626	chr17	73232693	73234010	-	1317	1317	NR_033345	GGA3
hsa_circ_0003803	3.65943	P	2.46369	A	2.29063	2.29063	up	circRNA	GGGCGCACAGAAAATCCAAGCAGAGATCTCAGCCCATGAGCTAACCCTAGAGGAGTTGAG	NA	circbase	NA	NA	NA	NA	NA	NA	NA	NA	NA	NA	NA	hsa_circ_0003803	chr6	144811206	144814592	+	3386	459	NM_007124	UTRN
hsa_circ_0017471	3.02911	A	4.10251	P	0.475198	2.10438	down	circRNA	TATAATGTATCACCTCCTTCGTTCTGCGTGTCCTGTACTCAACAGTCATCTCATGCTGCA	NA	circbase	NA	NA	NA	NA	NA	NA	NA	NA	NA	NA	NA	hsa_circ_0017471	chr10	1206492	1210612	+	4120	2211	TCONS_00017666	TCONS_00017666
hsa_circ_0066853	1.14966	A	5.06593	P	0.0662345	15.0979	down	circRNA	TTCCTCATGACATTGCTGTCTGGGAAAGCACCTACCAAGGCTTCCTATTACCTATTTCAC	NA	circbase	NA	NA	NA	NA	NA	NA	NA	NA	NA	NA	NA	hsa_circ_0066853	chr3	114412374	114432862	-	20488	88	NM_001164343	ZBTB20
hsa_circ_0047643	1.11619	A	4.43215	P	0.100415	9.9587	down	circRNA	CCCAGAGGATCATCAGAGATATTACATATGAAATATCAGTAGAAGCTATATCAACAATGG	NA	circbase	NA	NA	NA	NA	NA	NA	NA	NA	NA	NA	NA	hsa_circ_0047643	chr18	46783379	46860223	-	76844	966	NM_017653	DYM
hsa_circ_0054765	4.32412	P	2.968	A	2.55996	2.55996	up	circRNA	TGGAAGATGGGAATCTCTTGATGAAGTTACTATAAAAGACACTTTGGAAGGTGATAACAT	NA	circbase	NA	NA	NA	NA	NA	NA	NA	NA	NA	NA	NA	hsa_circ_0054765	chr2	61456682	61483613	-	26931	1073	NM_014709	USP34
hsa_circ_0022254	6.2211	P	4.10721	P	4.32856	4.32856	up	circRNA	GTTTTACCAAATAAAGTAGAATATAAGAAGAAAGGTACGCTGCCACCACTGACGAGGAGC	NA	circbase	NA	NA	NA	NA	NA	NA	NA	NA	NA	NA	NA	hsa_circ_0022254	chr11	61066918	61070223	-	3305	1170	NM_001923	DDB1
hsa_circ_0011003	5.35201	P	4.29574	P	2.07954	2.07954	up	circRNA	AAGGCAACGCTGAAAGGATGAGGGCGTCCTCAAGGAGATCTCCATCACGCACCACGTCAA	NA	circbase	NA	NA	NA	NA	NA	NA	NA	NA	NA	NA	NA	hsa_circ_0011003	chr1	26873357	26873761	+	404	199	NM_002953	RPS6KA1
hsa_circ_0083666	5.91224	P	7.4619	P	0.341588	2.9275	down	circRNA	ACTGTCACAGGAGACCTGGTATTGGCACGGAGATGTCAACAGCAACAAAGTGGTCATGAG	NA	circbase	NA	NA	NA	NA	NA	NA	NA	NA	NA	NA	NA	hsa_circ_0083666	chr8	23167180	23174627	-	7447	410	NM_002318	LOXL2
hsa_circ_0074610	1.1783	A	3.83772	P	0.158283	6.31782	down	circRNA	CATGATCAAGGACCTCATTGCTGATTTAAAGTATGAATTGACGGGCAAGTTTGAACGGTT	NA	circbase	NA	NA	NA	NA	NA	NA	NA	NA	NA	NA	NA	hsa_circ_0074610	chr5	150508967	150518352	-	9385	714	NM_001155	ANXA6
hsa_circ_0004539	2.87919	A	3.93702	P	0.480354	2.0818	down	circRNA	AAAGCATCTTCAATGTCTGTGGGCTGTTGCAAGGAATTGCAGGTGAGGCCGCAGGCGGTG	NA	circbase	NA	NA	NA	NA	NA	NA	NA	NA	NA	NA	NA	hsa_circ_0004539	chr5	77805606	77806221	-	615	615	NM_005779	LHFPL2
hsa_circ_0001938	6.57078	P	1.20825	A	41.1416	41.1416	up	circRNA	TTCTGCACACTCATCAGTCATGTGATGCAGGAAGAGAGCGCAAATGATATGGAATGTGAG	NA	circbase	NA	NA	NA	NA	NA	NA	NA	NA	NA	NA	NA	hsa_circ_0001938	chrX	106769811	106776780	+	6969	304	TCONS_l2_00030321	TCONS_l2_00030321
hsa_circ_0020296	5.4384	P	1.11419	A	20.0315	20.0315	up	circRNA	AAACAAGCAGAGCGGTTTCCCTTTGAGCCGGAACAGGATGACTGGGTTGACCGATGCTGG	NA	circbase	NA	NA	NA	NA	NA	NA	NA	NA	NA	NA	NA	hsa_circ_0020296	chr10	124913759	124920081	+	6322	818	NM_004725	BUB3
hsa_circ_0004850	7.91693	P	11.8453	M	0.0656832	15.2246	down	circRNA	AGATCTTGGGGCTTTCAACTGGCTTCTGTGTAATGTCATCCAAACCACTTCTCTCCATGA	NA	circbase	NA	NA	NA	NA	NA	NA	NA	NA	NA	NA	NA	hsa_circ_0004850	chr13	77655561	77661768	-	6207	693	NM_015057	MYCBP2
hsa_circ_0091260	4.53047	P	3.49591	A	2.04849	2.04849	up	circRNA	ATAATCATTACTATCCAGCAAGAGAAAGAGTGTGTTCAAACATCATAAAATGGGGATCGC	NA	circbase	NA	NA	NA	NA	NA	NA	NA	NA	NA	NA	NA	hsa_circ_0091260	chrX	101768609	101769052	-	443	443	NM_021992	TMSB15A
hsa_circ_0091339	4.07608	P	2.1102	A	3.90651	3.90651	up	circRNA	ATTTGGGAGACAAGTGTCAGTATGTGGAGGGATCTTTTGAGAAATACCTGGAACGGTTGG	NA	circbase	NA	NA	NA	NA	NA	NA	NA	NA	NA	NA	NA	hsa_circ_0091339	chrX	110954902	110966085	+	11183	666	NR_033127	ALG13
hsa_circ_0067663	2.23047	A	3.56744	P	0.395849	2.52622	down	circRNA	TGGATTATTGGTTTCGTCTTGATATATATCGATGTTTGGCCAGTCCAGCTCTAATAATGT	NA	circbase	NA	NA	NA	NA	NA	NA	NA	NA	NA	NA	NA	hsa_circ_0067663	chr3	142496473	142503882	+	7409	665	NM_001251845	TRPC1
hsa_circ_0056889	9.4297	P	8.36911	P	2.08578	2.08578	up	circRNA	TACATTGTGTTCAAAATATGAAACCAGAGGAGTATGCTCATAAGGCCCGTGGTCGAGCCA	NA	circbase	NA	NA	NA	NA	NA	NA	NA	NA	NA	NA	NA	hsa_circ_0056889	chr2	163128735	163128897	-	162	162	NM_022168	IFIH1
hsa_circ_0080102	2.63536	A	3.69114	P	0.481038	2.07884	down	circRNA	TTCCACGCCTTCTACCAAACTTCCTACTTTACACCAGCACTGGAGGAGGCTGGTGGGGCA	NA	circbase	NA	NA	NA	NA	NA	NA	NA	NA	NA	NA	NA	hsa_circ_0080102	chr7	45014772	45018704	-	3932	762	NM_033054	MYO1G
hsa_circ_0033166	4.86865	P	2.24754	A	6.15222	6.15222	up	circRNA	CAAGAAGGAGGTTGTGATCAATTATTCAATCGTGAAAGGGCTGAAGTACAATCAGGCCAC	NA	circbase	NA	NA	NA	NA	NA	NA	NA	NA	NA	NA	NA	hsa_circ_0033166	chr14	100563817	100563995	+	178	178	NM_016337	EVL
hsa_circ_0032566	3.70812	P	2.55131	A	2.22964	2.22964	up	circRNA	GGGGCTGGAGGCATTGACAGATGCGCTGCTGGAGCCACCAACGTCTGTGGCCCTGGAACC	NA	circbase	NA	NA	NA	NA	NA	NA	NA	NA	NA	NA	NA	hsa_circ_0032566	chr14	74972750	74989621	-	16871	1647	NM_000428	LTBP2
hsa_circ_0013882	9.08667	P	5.85411	P	9.39931	9.39931	up	circRNA	ACCCCAGAAGGCACCTGTGTCTGCTAAAAAAGAAAAGAAAGTTTCCTGCATGTTCATTCC	NA	circbase	NA	NA	NA	NA	NA	NA	NA	NA	NA	NA	NA	hsa_circ_0013882	chr1	145440037	145440788	+	751	517	NM_006472	TXNIP
hsa_circ_0079356	7.65975	P	5.19223	P	5.53093	5.53093	up	circRNA	GGCACACAAGGAAGCTGATCTGGATGCAGAATTAGAAAACTGCCATCATTACATGCAGTT	NA	circbase	NA	NA	NA	NA	NA	NA	NA	NA	NA	NA	NA	hsa_circ_0079356	chr7	6461357	6470238	-	8881	417	NM_139179	DAGLB
hsa_circ_0082788	3.8293	P	2.81061	A	2.02607	2.02607	up	circRNA	TCTTCGTGCTATCACACACCCAGCTGGCTGCATGTCTCAGTTTATAAAGTTCTTTGGAGA	NA	circbase	NA	NA	NA	NA	NA	NA	NA	NA	NA	NA	NA	hsa_circ_0082788	chr7	141363971	141366225	-	2254	491	NM_001080392	KIAA1147
hsa_circ_0073345	2.93093	A	4.04052	P	0.463425	2.15785	down	circRNA	TAGTACCCAGATCAGGTTTCATTGTTGCTGAAATTGAACCAATGGGCGTCTTCCAATTTT	NA	circbase	NA	NA	NA	NA	NA	NA	NA	NA	NA	NA	NA	hsa_circ_0073345	chr5	90106049	90125003	+	18954	1639	NM_032119	GPR98
hsa_circ_0066787	5.58675	P	6.73257	P	0.451931	2.21273	down	circRNA	CAAAGGGCACAGGAGAAGGTAAAGCTTGATGCTGAAAGGGAAAAACTAGAGAGGCTTCAG	NA	circbase	NA	NA	NA	NA	NA	NA	NA	NA	NA	NA	NA	hsa_circ_0066787	chr3	111651115	111686671	+	35556	1314	NM_001134438	PHLDB2
hsa_circ_0017709	4.52473	P	3.29565	A	2.34417	2.34417	up	circRNA	ATATTTTCAGATGCTTCTGTCAGACTTCTCTCATCACCATATTGAAATGGCATGCACCCT	NA	circbase	NA	NA	NA	NA	NA	NA	NA	NA	NA	NA	NA	hsa_circ_0017709	chr10	11997230	12006124	-	8894	783	NM_080599	UPF2
hsa_circ_0072554	6.47811	P	4.16227	P	4.97897	4.97897	up	circRNA	TTCAACAATGGTGCTCACATGAGCCTCCTTCCAGACAAAAAGCCTTGAAGACAGTACCAT	NA	circbase	NA	NA	NA	NA	NA	NA	NA	NA	NA	NA	NA	hsa_circ_0072554	chr5	57751365	57751606	-	241	241	NM_006622	PLK2
hsa_circ_0062421	2.68269	A	4.19093	P	0.351539	2.84464	down	circRNA	ATGGCTATATTAATAAAATAACGTGTGTCTTTCAAAACTCCCCTGGGAGCGCGAGCGGTG	NA	circbase	NA	NA	NA	NA	NA	NA	NA	NA	NA	NA	NA	hsa_circ_0062421	chr22	21982377	21984340	-	1963	1338	NM_001017964	YDJC
hsa_circ_0056856	3.3048	P	1.61307	A	3.23043	3.23043	up	circRNA	TCAGTGAAGAAGAAGGTAACGGCGACTGTGACTGTGGTGAATGTGTGTGCAGGAGCGGCT	NA	circbase	NA	NA	NA	NA	NA	NA	NA	NA	NA	NA	NA	hsa_circ_0056856	chr2	160980301	160983112	-	2811	321	NM_000888	ITGB6
hsa_circ_0028223	7.2274	P	1.11466	A	69.2018	69.2018	up	circRNA	TGCTCTGGAAACCACACGTAAAAGAAGATACAACATTAAACTATGGAAAACTTTCACAGA	NA	circbase	NA	NA	NA	NA	NA	NA	NA	NA	NA	NA	NA	hsa_circ_0028223	chr12	111157612	111162569	-	4957	1822	NM_002710	PPP1CC
hsa_circ_0003887	2.22951	A	3.67962	P	0.365994	2.73228	down	circRNA	ATCACAGCTCTCCAAGAAGAGGCAATTCGGACATAAAGAGAAACATCAAGGGCATGAGTG	NA	circbase	NA	NA	NA	NA	NA	NA	NA	NA	NA	NA	NA	hsa_circ_0003887	chr11	36415395	36415918	+	523	523	NM_001160167	PRR5L
hsa_circ_0017716	3.86188	P	2.33318	A	2.88524	2.88524	up	circRNA	CTAGACAAAGAGAAAAAGAAGAATCCATTCAGCTTCATCAGGAAGCTTGGGAACGACATC	NA	circbase	NA	NA	NA	NA	NA	NA	NA	NA	NA	NA	NA	hsa_circ_0017716	chr10	12039670	12071523	-	31853	1479	NM_080599	UPF2
hsa_circ_0079483	3.94903	P	1.97804	A	3.92038	3.92038	up	circRNA	TGAATTAAATTGTAGTGACTATGACTTGGAATTTGGAACTGAGTGTTTGCAATTGGCCCT	NA	circbase	NA	NA	NA	NA	NA	NA	NA	NA	NA	NA	NA	hsa_circ_0079483	chr7	16317753	16348252	-	30499	249	NM_001101426	ISPD
hsa_circ_0024155	1.87883	A	3.48547	P	0.328363	3.04541	down	circRNA	TCACAAGGAGGAAGAAGAAAGAGACAGATGAATGAAGACCAGCAAGAAGTAATCCTTGTC	NA	circbase	NA	NA	NA	NA	NA	NA	NA	NA	NA	NA	NA	hsa_circ_0024155	chr11	107263504	107263621	-	117	117	NM_152434	CWF19L2
hsa_circ_0014057	6.39234	P	5.04093	P	2.55161	2.55161	up	circRNA	TAGAAGAGTGTCTACCCACAGGGAACCTTGAGTCAGATGTCTGGAGAACTAAGCAAAGAT	NA	circbase	NA	NA	NA	NA	NA	NA	NA	NA	NA	NA	NA	hsa_circ_0014057	chr1	150915038	150923957	+	8919	1783	NM_001145415	SETDB1
hsa_circ_0049636	10.9781	P	11.995	P	0.494188	2.02352	down	circRNA	TGAGGAGTTTGGCAACGAGACGTGGGGCGTAACAAAGGCGGCGTCCGTCCGTACTGCAGA	NA	circbase	NA	NA	NA	NA	NA	NA	NA	NA	NA	NA	NA	hsa_circ_0049636	chr19	13049413	13054443	+	5030	1133	NM_004343	CALR
hsa_circ_0054078	3.82348	P	2.4342	A	2.61949	2.61949	up	circRNA	GCTTTGACAACATTCCATCTGTAATGAAAGCCCATGGAGCTCATCTGAAAGCTAGTGCTG	NA	circbase	NA	NA	NA	NA	NA	NA	NA	NA	NA	NA	NA	hsa_circ_0054078	chr2	37276795	37285703	-	8908	747	NM_019024	HEATR5B
hsa_circ_0040427	3.2574	P	1.71389	A	2.91503	2.91503	up	circRNA	CATTATGACGCACCTGCAGCAGCATGAGAGTGGTGTAGAAGGTGAGAGCTGCTACTACCA	NA	circbase	NA	NA	NA	NA	NA	NA	NA	NA	NA	NA	NA	hsa_circ_0040427	chr16	72845475	72923861	-	78386	648	NM_006885	ZFHX3
hsa_circ_0065398	8.0255	P	11.3802	M	0.0977538	10.2298	down	circRNA	TTAAAGCTGCTGTTTTAAAAGGCGGCAGAGATGGCCCTCCTGGACTCCCTGGAACCCCTG	NA	circbase	NA	NA	NA	NA	NA	NA	NA	NA	NA	NA	NA	hsa_circ_0065398	chr3	48601505	48612559	-	11054	2952	NM_000094	COL7A1
hsa_circ_0067681	3.24316	P	1.11189	A	4.38105	4.38105	up	circRNA	CTGGCAGATTTTTGAAAATCCTGTGATTCTCCTGAATTATTTTGGAAACTATGTACCCAA	NA	circbase	NA	NA	NA	NA	NA	NA	NA	NA	NA	NA	NA	hsa_circ_0067681	chr3	145794568	145809688	-	15120	900	NM_182943	PLOD2
hsa_circ_0006113	5.20104	P	7.05206	P	0.277197	3.60755	down	circRNA	TGGAGACTAGGGGCCTAATGTCCACCTAAGACGTGGTGTTCACCTGGGGTCTGATGTTCA	NA	circbase	NA	NA	NA	NA	NA	NA	NA	NA	NA	NA	NA	hsa_circ_0006113	chr2	132515930	132516820	+	890	890	NM_013310	C2orf27A
hsa_circ_0012738	3.24365	P	1.16016	A	4.2383	4.2383	up	circRNA	GCAGTCTATGGCTAAATTTGGCCGAAGATGGACCAAAATTTCAAAGCTAATTGGAAGCCG	NA	circbase	NA	NA	NA	NA	NA	NA	NA	NA	NA	NA	NA	hsa_circ_0012738	chr1	59141148	59150923	-	9775	1095	NM_001085487	MYSM1
hsa_circ_0003067	2.61155	A	5.66116	P	0.120775	8.27988	down	circRNA	TTGGTGAAAAGACCAAGCTGAAATACAGATTCTGCTCTTCAAGTCCAGCTGGACACAGTG	NA	circbase	NA	NA	NA	NA	NA	NA	NA	NA	NA	NA	NA	hsa_circ_0003067	chr3	111622812	111639266	+	16454	10019	NM_001134438	PHLDB2
hsa_circ_0000502	3.45126	P	2.28351	A	2.24661	2.24661	up	circRNA	ATAAAACAAGGCTTAACAGCAGAATCAAACTGGCAGAAGTAATCAGCAAACTTGAATATC	NA	circbase	NA	NA	NA	NA	NA	NA	NA	NA	NA	NA	NA	hsa_circ_0000502	chr13	108895879	108903664	+	7785	7785	---	---
hsa_circ_0075802	4.63514	P	3.23812	A	2.63357	2.63357	up	circRNA	ATGGTCACTGCTAGTGTATCCAATATTCACAGGTACTCTGTGCATCTTTTTGTGCTGGTG	NA	circbase	NA	NA	NA	NA	NA	NA	NA	NA	NA	NA	NA	hsa_circ_0075802	chr6	20151415	20151493	-	78	78	NM_001080480	MBOAT1
hsa_circ_0083991	4.39568	P	3.08098	A	2.4875	2.4875	up	circRNA	ATGTAGGCTTTTGTTTCGTTTGTGCCAGAGGCCCGATGAGAGAAAGGGAAAGTTAAGGAT	NA	circbase	NA	NA	NA	NA	NA	NA	NA	NA	NA	NA	NA	hsa_circ_0083991	chr8	38162104	38205733	-	43629	2655	NM_023034	WHSC1L1
hsa_circ_0083794	1.82989	A	3.48058	P	0.318487	3.13985	down	circRNA	TAAAAAGGAATTCATGGCAGGGAGTCGGAGAAAAAGCTGACCTAATGAAACTGTGGCAAC	NA	circbase	NA	NA	NA	NA	NA	NA	NA	NA	NA	NA	NA	hsa_circ_0083794	chr8	28285928	28347784	-	61856	1292	NM_172366	FBXO16
hsa_circ_0090032	3.0473	A	4.12963	P	0.472263	2.11747	down	circRNA	GAAATGCTTCCAAACAGAACAGAAGAAAAAGTGGAGGCCATAGTGGAGTTTGACTACCAG	NA	circbase	NA	NA	NA	NA	NA	NA	NA	NA	NA	NA	NA	hsa_circ_0090032	chrX	19610184	19854400	-	244216	1134	NM_031892	SH3KBP1
hsa_circ_0011503	5.63182	P	1.71558	A	15.0975	15.0975	up	circRNA	AGTTCCCTGGGATTCAAGGCTTCTTATGAAGCTGATGATGCCTGTGGTGGGACCCTGCGG	NA	circbase	NA	NA	NA	NA	NA	NA	NA	NA	NA	NA	NA	hsa_circ_0011503	chr1	34254200	34383902	-	129702	951	NM_052896	CSMD2
hsa_circ_0053298	3.58589	P	2.13565	A	2.73253	2.73253	up	circRNA	ATAAATGACTCTCAGAAAGAGGCTGTGAGGCTGTCTACAGCAGTGTATCTGGCCTTAAAG	NA	circbase	NA	NA	NA	NA	NA	NA	NA	NA	NA	NA	NA	hsa_circ_0053298	chr2	27839128	27845963	+	6835	2106	NM_032434	ZNF512
hsa_circ_0070317	4.43084	P	9.9433	M	0.0219071	45.6472	down	circRNA	AAATGTGGCGTCAAAGAGAAGATCACAGGGATTGTCACTGGATGCAGTGTATCATTGCCT	NA	circbase	NA	NA	NA	NA	NA	NA	NA	NA	NA	NA	NA	hsa_circ_0070317	chr4	85654534	85661569	-	7035	987	NM_014991	WDFY3
hsa_circ_0028612	5.08625	P	1.10676	A	15.7741	15.7741	up	circRNA	ATAGCTGCGGAATTTGAAGTTCCGAAACTGATATACATCAGGGGATGTGAGAGTGTGGGA	NA	circbase	NA	NA	NA	NA	NA	NA	NA	NA	NA	NA	NA	hsa_circ_0028612	chr12	117402501	117423207	+	20706	355	NM_153348	FBXW8
hsa_circ_0010863	5.25711	P	1.552	A	13.0421	13.0421	up	circRNA	TCCAGAACGGGGGCACCCGCAGGGACTACATTATGGCCAAGTATGTGGAGCATAGGTTTG	NA	circbase	NA	NA	NA	NA	NA	NA	NA	NA	NA	NA	NA	hsa_circ_0010863	chr1	23761025	23762521	-	1496	264	NM_017707	ASAP3
hsa_circ_0077696	3.93895	P	2.93654	A	2.00334	2.00334	up	circRNA	TTTTTCCTTACTGAACAATGGTCAAAAAACATTTGATTTTTGGAAGGATATAGTTGCTGC	NA	circbase	NA	NA	NA	NA	NA	NA	NA	NA	NA	NA	NA	hsa_circ_0077696	chr6	116439023	116566853	+	127830	2590	NM_152729	NT5DC1
hsa_circ_0058661	4.57224	P	3.44102	P	2.19044	2.19044	up	circRNA	AGAAGTTCAGTCTCAGCGCTTGACCACATCCCATCCTGGAGAGCAGAGGGAGACCGTTCT	NA	circbase	NA	NA	NA	NA	NA	NA	NA	NA	NA	NA	NA	hsa_circ_0058661	chr2	232127018	232137791	+	10773	308	NM_025139	ARMC9
hsa_circ_0045520	2.86146	A	4.0953	P	0.425183	2.35193	down	circRNA	AAATACAAAACAAGTCTGCTTCTTCAAAATTCTGCTGGTTGCTTCTGCTTTTAATTTTTT	NA	circbase	NA	NA	NA	NA	NA	NA	NA	NA	NA	NA	NA	hsa_circ_0045520	chr17	67270099	67270269	-	170	170	NM_018672	ABCA5
hsa_circ_0044998	5.18131	P	8.33071	P	0.112703	8.87286	down	circRNA	TGCTGCCTCAGGTACAGGACATCTGCTTCAGCCATGACTGTCGCTGGGTTGTGGTCAGTA	NA	circbase	NA	NA	NA	NA	NA	NA	NA	NA	NA	NA	NA	hsa_circ_0044998	chr17	59067331	59161925	+	94594	1249	NM_001099432	BCAS3
hsa_circ_0088282	4.02335	P	2.99363	A	2.04162	2.04162	up	circRNA	TGGAAAAGCTATTTCTCAACGCTTCTGGCTAGCAAGGAGGACGAGGACACGATCAAAATT	NA	circbase	NA	NA	NA	NA	NA	NA	NA	NA	NA	NA	NA	hsa_circ_0088282	chr9	123199572	123222945	-	23373	1849	NM_018249	CDK5RAP2
hsa_circ_0011511	1.77346	A	4.32678	P	0.170363	5.8698	down	circRNA	TTAATAAAAGTCAACTCATTTGCTGGATGAAATTCAAGCTGCTTGCTGAGTCCTATTGCC	NA	circbase	NA	NA	NA	NA	NA	NA	NA	NA	NA	NA	NA	hsa_circ_0011511	chr1	35220720	35224112	+	3392	1281	NM_005268	GJB5
hsa_circ_0081933	3.96461	P	2.72838	A	2.35582	2.35582	up	circRNA	AACTGTGAAAGCTTGTTCTCATGCCATACTGTAAATCACTGGACATCTTCACCGTGGGAG	NA	circbase	NA	NA	NA	NA	NA	NA	NA	NA	NA	NA	NA	hsa_circ_0081933	chr7	107599693	107601094	-	1401	581	NM_002291	LAMB1
hsa_circ_0027235	2.4259	A	3.74296	P	0.401352	2.49158	down	circRNA	AAACAAGGAACGGAAGAAGGGACAGGCAGATAAGAAAAATCCCTGTCATTTCAGCCCTGA	NA	circbase	NA	NA	NA	NA	NA	NA	NA	NA	NA	NA	NA	hsa_circ_0027235	chr12	57640586	57644976	-	4390	805	NM_145064	STAC3
hsa_circ_0046738	3.67189	P	2.48225	A	2.28095	2.28095	up	circRNA	ACAAGACAAAATAGATTTTATGATTAGTGTTATTTCTGAAGATGACAGTATCATTAAAAA	NA	circbase	NA	NA	NA	NA	NA	NA	NA	NA	NA	NA	NA	hsa_circ_0046738	chr18	2751275	2796519	+	45244	1828	NM_015295	SMCHD1
hsa_circ_0039912	4.09687	P	6.20465	P	0.232004	4.31028	down	circRNA	CCAGGCTTGTGCTGTAACAGAGGAGGAAATGATTTTGAATAGCCTCTCTCTGTGTTACCA	NA	circbase	NA	NA	NA	NA	NA	NA	NA	NA	NA	NA	NA	hsa_circ_0039912	chr16	68071908	68088520	+	16612	326	NM_017803	DUS2L
hsa_circ_0045165	2.08166	A	3.61096	P	0.346446	2.88645	down	circRNA	CTTGCACAAGTTTTGCAGTAGAAGAGTATAACCATGTTTCGGAATAGTCTCAAGATGCTG	NA	circbase	NA	NA	NA	NA	NA	NA	NA	NA	NA	NA	NA	hsa_circ_0045165	chr17	61086897	61483638	+	396741	3390	NM_025185	TANC2
hsa_circ_0070614	5.04396	P	3.80725	P	2.35659	2.35659	up	circRNA	GCCTTCATTTTGATTGTCTTCTGGATGGTTTCACTGGGATCGATTCTGAATATGAAAAGC	NA	circbase	NA	NA	NA	NA	NA	NA	NA	NA	NA	NA	NA	hsa_circ_0070614	chr4	108578051	108603289	-	25238	345	NM_005443	PAPSS1
hsa_circ_0016386	3.80886	P	5.46095	P	0.318178	3.14289	down	circRNA	AGAAGAAAAAAGAGTCAAGACCTGGCCTAGGATTTCCAGCAAAGTGTTACTGTGGTCCTC	NA	circbase	NA	NA	NA	NA	NA	NA	NA	NA	NA	NA	NA	hsa_circ_0016386	chr1	212240153	212254092	+	13939	622	NM_016448	DTL
hsa_circ_0054296	6.70416	P	3.07658	A	12.3598	12.3598	up	circRNA	CCTATTCTTGTTCTGGAGAGTCTTGGCTTCTGGGAGGAAGTCAGAGGGATTATCTCAGGA	NA	circbase	NA	NA	NA	NA	NA	NA	NA	NA	NA	NA	NA	hsa_circ_0054296	chr2	43514046	43520352	-	6306	726	NM_001083953	THADA
hsa_circ_0081657	3.47822	P	1.60911	A	3.65309	3.65309	up	circRNA	ACAAGTACAAGGCACCCGGCGAGCCTGTCAGGATTGGAGCTGCTTTCCGAGCACCTGGAC	NA	circbase	NA	NA	NA	NA	NA	NA	NA	NA	NA	NA	NA	hsa_circ_0081657	chr7	102106263	102109101	+	2838	940	NM_152892	LRWD1
hsa_circ_0028981	4.08053	P	2.27503	A	3.49551	3.49551	up	circRNA	TGAGTGGACGCAAGCGGGTTGGATCCATGCCGTCTACACCCCTGTAGACTCTTTGGTGTT	NA	circbase	NA	NA	NA	NA	NA	NA	NA	NA	NA	NA	NA	hsa_circ_0028981	chr12	121881814	121958903	-	77089	1520	NM_032590	KDM2B
hsa_circ_0078179	2.81895	A	4.2189	P	0.378944	2.63891	down	circRNA	CCTTCAGGAGATTTTCAAGAACCATATGCTGTGGTTGTTCTTCTAGAAAAGGATTTAGTA	NA	circbase	NA	NA	NA	NA	NA	NA	NA	NA	NA	NA	NA	hsa_circ_0078179	chr6	147632590	147648412	+	15822	1008	NM_001127715	STXBP5
hsa_circ_0077117	8.26049	P	5.35564	P	7.48941	7.48941	up	circRNA	GAAAAAGGAAGGTGAAGTATTACAGACACTTAGCACCTGATCACTTGCTGCAAATATGTC	NA	circbase	NA	NA	NA	NA	NA	NA	NA	NA	NA	NA	NA	hsa_circ_0077117	chr6	79664948	79770535	-	105587	3714	NM_017934	PHIP
hsa_circ_0064777	3.79509	P	6.11653	P	0.200068	4.99831	down	circRNA	GCGTCACTAGATAAAAGCTTCGATGATGAAGAATCAGTGGATGGAAATAGGCCATCATCA	NA	circbase	NA	NA	NA	NA	NA	NA	NA	NA	NA	NA	NA	hsa_circ_0064777	chr3	33644443	33686395	-	41952	1212	NM_015097	CLASP2
hsa_circ_0003559	2.05778	A	4.10946	P	0.241202	4.1459	down	circRNA	CCCCTCGAGGGATGGCTACTTTTCTCATCGGCCGAAAGAGAAAGTGCGAACAGACAGCAA	NA	circbase	NA	NA	NA	NA	NA	NA	NA	NA	NA	NA	NA	hsa_circ_0003559	chr16	17352844	17353355	-	511	511	NM_022166	XYLT1
hsa_circ_0091777	6.32659	P	4.73008	P	3.02412	3.02412	up	circRNA	GCCCTGAAGGGAACAAACAATTCCTCCGTCCGCTAAGTATGGCGGGCGGCACACGGTGAC	NA	circbase	NA	NA	NA	NA	NA	NA	NA	NA	NA	NA	NA	hsa_circ_0091777	chrX	153055166	153056030	-	864	223	NM_174869	IDH3G
hsa_circ_0001004	5.23374	P	2.31712	A	7.55078	7.55078	up	circRNA	TAAAAGTAAAGAAGACAACAATGTGGAAGGTGGGTGCTTTCTACCTTATTTTTCCAACTC	NA	circbase	NA	NA	NA	NA	NA	NA	NA	NA	NA	NA	NA	hsa_circ_0001004	chr2	51149006	51153093	-	4087	837	NM_004801	NRXN1
hsa_circ_0073764	3.62369	P	7.51383	P	0.0674454	14.8268	down	circRNA	TGTACATATGGAGGAGCATATTATTTAATATCTAGAAGTCTAGGGCCAGAATTTGGTGGT	NA	circbase	NA	NA	NA	NA	NA	NA	NA	NA	NA	NA	NA	hsa_circ_0073764	chr5	127466758	127493856	+	27098	1427	NM_001046	SLC12A2
hsa_circ_0042865	1.17939	A	3.67875	P	0.176855	5.65436	down	circRNA	AAACTTAACACATCCACTAAAAATGTACCTGAATGAAATTCACCAGAATTAGTACTCCCA	NA	circbase	NA	NA	NA	NA	NA	NA	NA	NA	NA	NA	NA	hsa_circ_0042865	chr17	29164223	29171057	+	6834	401	NM_024857	ATAD5
hsa_circ_0083301	5.81507	P	11.1616	M	0.0245773	40.6879	down	circRNA	AGGAGAACAGGTGAATACAAGAAAGACGAACTCCTAGAAGCTGCTAGGAGTGGTAATGAA	NA	circbase	NA	NA	NA	NA	NA	NA	NA	NA	NA	NA	NA	hsa_circ_0083301	chr8	9537460	9627772	+	90312	2903	NM_003747	TNKS
hsa_circ_0001471	4.27972	P	5.34245	P	0.478727	2.08887	down	circRNA	TGCCATGGAGATATGGTCCAGACCTGTACATGAATAACTTTGGTTAGTCAGAGTGAAATA	NA	circbase	NA	NA	NA	NA	NA	NA	NA	NA	NA	NA	NA	hsa_circ_0001471	chr5	36136410	36143508	-	7098	804	NM_001007527	LMBRD2
hsa_circ_0021491	2.92676	A	4.23631	P	0.403448	2.47863	down	circRNA	AACAGGACAGACTGATGCTGAGAAGCACTCACAGGTGGAGAGGAATTCCCTGTGGTCTGG	NA	circbase	NA	NA	NA	NA	NA	NA	NA	NA	NA	NA	NA	hsa_circ_0021491	chr11	20065526	20071447	+	5921	1529	NM_001244963	NAV2
hsa_circ_0058126	3.82568	P	8.06814	M	0.0528315	18.9281	down	circRNA	CCACGCTCAGGGTACAGAATAGTCTATTCGCCATCAGTAGAAGGTAGCAGCACAGAACTC	NA	circbase	NA	NA	NA	NA	NA	NA	NA	NA	NA	NA	NA	hsa_circ_0058126	chr2	216271849	216272044	-	195	195	NM_212482	FN1
hsa_circ_0080200	9.24488	P	10.4088	P	0.446297	2.24066	down	circRNA	AGATGTGAAGTGATTGCCCCGTCAGACTTTTAAATCCAAACATAGCAAAAATGAAAGAAG	NA	circbase	NA	NA	NA	NA	NA	NA	NA	NA	NA	NA	NA	hsa_circ_0080200	chr7	48139266	48139384	+	118	118	NM_181597	UPP1
hsa_circ_0060979	4.9186	P	6.7368	P	0.283576	3.5264	down	circRNA	TTTTGATCCAAACATCAACCCAACAATAGGAGGTGACGCGGCCGGCGTCCCAAGATGGCG	NA	circbase	NA	NA	NA	NA	NA	NA	NA	NA	NA	NA	NA	hsa_circ_0060979	chr20	56884770	56886178	+	1408	378	NM_020673	RAB22A
hsa_circ_0024286	3.36202	P	2.16663	A	2.29007	2.29007	up	circRNA	AGGACTTAAACCTGACTTCACCCAGTCCAATCCACAGTGCAAAGAGCGAGTCCATTATAA	NA	circbase	NA	NA	NA	NA	NA	NA	NA	NA	NA	NA	NA	hsa_circ_0024286	chr11	111851461	111857648	+	6187	405	NM_001037954	DIXDC1
hsa_circ_0020034	4.14533	P	6.13484	P	0.251825	3.97102	down	circRNA	TCTACCTAGAGTACACTGGAGAACCTAGAAGAACTGTATTTGAATGACAACCCCAACCTG	NA	circbase	NA	NA	NA	NA	NA	NA	NA	NA	NA	NA	NA	hsa_circ_0020034	chr10	112771367	112773425	+	2058	2058	NM_007373	SHOC2
hsa_circ_0066402	3.398	P	1.72353	A	3.19203	3.19203	up	circRNA	TCCTGTTGAGACATGTTACTTCCTGTATGGAGGCATGGCCAGTTTCCAGCCCCGCGCTCT	NA	circbase	NA	NA	NA	NA	NA	NA	NA	NA	NA	NA	NA	hsa_circ_0066402	chr3	61547242	61989171	+	441929	1238	NM_002841	PTPRG
hsa_circ_0037727	4.17947	P	5.79971	P	0.325283	3.07424	down	circRNA	GCTTTAGGAGGAAATTGGTTCATCACCACTGGACCTGTGGCAGTCTGTAGAGCAGCTCCC	NA	circbase	NA	NA	NA	NA	NA	NA	NA	NA	NA	NA	NA	hsa_circ_0037727	chr16	4625174	4641785	+	16611	2018	NM_001145011	C16orf96
hsa_circ_0077157	5.2562	P	3.96668	P	2.44448	2.44448	up	circRNA	TTTTATATGGATAACTCGGGAACTGTTAACCAAATTATGATGATGGCAAACAACCCAGAG	NA	circbase	NA	NA	NA	NA	NA	NA	NA	NA	NA	NA	NA	hsa_circ_0077157	chr6	80717525	80721265	+	3740	589	NM_001166691	TTK
hsa_circ_0045035	3.4457	P	2.1896	A	2.3885	2.3885	up	circRNA	TTCATACCTGAGCTTATTGCACAGCCAGAACTTGAGAAACAGGCATAAACTTGGAGGAGG	NA	circbase	NA	NA	NA	NA	NA	NA	NA	NA	NA	NA	NA	hsa_circ_0045035	chr17	59946633	60002460	-	55827	2845	NR_026641	INTS2
hsa_circ_0060670	3.39381	P	4.43647	P	0.485431	2.06002	down	circRNA	CATTAATAGATGCAAGTTAGATGTACGAACAAGAAACTCATCGCATACGGGCACATCACT	NA	circbase	NA	NA	NA	NA	NA	NA	NA	NA	NA	NA	NA	hsa_circ_0060670	chr20	47567859	47630231	+	62372	3773	NM_006420	ARFGEF2
hsa_circ_0001287	2.53358	A	3.74782	P	0.430998	2.32019	down	circRNA	CCAAAGCTCAGCAGGCAAGAGAGAACATGAAAAGAAAGGAAGAATCCTGGTTAGATAACA	NA	circbase	NA	NA	NA	NA	NA	NA	NA	NA	NA	NA	NA	hsa_circ_0001287	chr3	44434346	44442826	+	8480	678	NM_173826	C3orf23
hsa_circ_0057964	4.20892	P	5.44273	P	0.425193	2.35187	down	circRNA	CAACAAGCAGAACACAAGCAGACATTCCCAAACATTCTAAAGAAGGGTTACCTGGAGATT	NA	circbase	NA	NA	NA	NA	NA	NA	NA	NA	NA	NA	NA	hsa_circ_0057964	chr2	208725828	208842310	-	116482	1498	NM_001080475	PLEKHM3
hsa_circ_0019458	3.63942	P	1.70997	A	3.80908	3.80908	up	circRNA	CACCATCAAGGTATCTGTGGTCACATTTTCTGTTTATGTCCTGGTGGATAGCAACAATAT	NA	circbase	NA	NA	NA	NA	NA	NA	NA	NA	NA	NA	NA	hsa_circ_0019458	chr10	101567839	101572901	+	5062	426	NM_000392	ABCC2
hsa_circ_0040645	1.25969	A	4.54467	P	0.102594	9.74716	down	circRNA	AAACCATCAGGCACCACAGTGATGCGGATGACAGCCTTTGATGCAGATGACCCAGCCACC	NA	circbase	NA	NA	NA	NA	NA	NA	NA	NA	NA	NA	NA	hsa_circ_0040645	chr16	83520081	83712066	+	191985	757	NM_001220488	CDH13
hsa_circ_0013962	3.93724	P	2.89217	A	2.06347	2.06347	up	circRNA	TCTTACCAAGTCTCTGTTTGGCTTTTAACAGATACGTCAGTATGTTGTACAGGTGATCTT	NA	circbase	NA	NA	NA	NA	NA	NA	NA	NA	NA	NA	NA	hsa_circ_0013962	chr1	147410806	147460753	+	49947	1014	NM_016334	GPR89B
hsa_circ_0062854	3.21125	A	5.45982	P	0.210432	4.75212	down	circRNA	GGTGCAGGAGTTCACCTTTCTTGGATCACATGCAAAGGATGTTTAGGTCTGTGAAGAAAA	NA	circbase	NA	NA	NA	NA	NA	NA	NA	NA	NA	NA	NA	hsa_circ_0062854	chr22	31324005	31359320	-	35315	3072	NM_014941	MORC2
hsa_circ_0054056	5.04363	P	15.6149	M	0.000657253	1521.48	down	circRNA	TATTGCAGAAGATCAGATGTCAGTCCTTTTGCCCCTGGGGTTAGTTCTCGAACTGATATC	NA	circbase	NA	NA	NA	NA	NA	NA	NA	NA	NA	NA	NA	hsa_circ_0054056	chr2	37232774	37256063	-	23289	1544	NM_019024	HEATR5B
hsa_circ_0021426	5.52518	P	4.50739	P	2.02483	2.02483	up	circRNA	TCTGAATGATATGAGCCTGATGGAAGGGGACAATGGGAGGAAAAAGAGGTAACTAGTCCA	NA	circbase	NA	NA	NA	NA	NA	NA	NA	NA	NA	NA	NA	hsa_circ_0021426	chr11	18305341	18314523	-	9182	1274	NM_181507	HPS5
hsa_circ_0087260	5.97103	P	4.76373	P	2.30904	2.30904	up	circRNA	TTGCTGAACTTAATGGATCCTCACAAAGCTACAAGAAGCAAGAGAACCTTCTCCGAGCCT	NA	circbase	NA	NA	NA	NA	NA	NA	NA	NA	NA	NA	NA	hsa_circ_0087260	chr9	80030871	80032399	+	1528	1528	NM_033305	VPS13A
hsa_circ_0062294	1.58573	A	3.64682	P	0.239635	4.17302	down	circRNA	ATAAAGACATCAGCCATTCGTTGCCAGAAGCCAGGATCATAGAGACGCTCGGCCTCCGCC	NA	circbase	NA	NA	NA	NA	NA	NA	NA	NA	NA	NA	NA	hsa_circ_0062294	chr22	20099397	20104768	-	5371	2905	NM_022727	TRMT2A
hsa_circ_0081317	3.10665	A	4.16212	P	0.481141	2.07839	down	circRNA	CAGCCACCAGGGCCTTGAAGTTATTGAATCTACAAATTTAAAATACTTCACAAAAGAGAT	NA	circbase	NA	NA	NA	NA	NA	NA	NA	NA	NA	NA	NA	hsa_circ_0081317	chr7	98582566	98606184	+	23618	1596	NM_001244580	TRRAP
hsa_circ_0020483	1.10905	A	5.09279	P	0.0632081	15.8208	down	circRNA	AGCTCAGCTTCAGCATGCAGTCGAGGAAAAGTTTTCATTTACCGAGGGAAAGAGTATGAG	NA	circbase	NA	NA	NA	NA	NA	NA	NA	NA	NA	NA	NA	hsa_circ_0020483	chr10	129207300	129242543	+	35243	1291	NM_001380	DOCK1
hsa_circ_0015680	3.88461	P	10.4417	M	0.0106202	94.1601	down	circRNA	CTTGTTGAATTATGCCTACACTGCTCACCAAATTTATAAGGAAAAATGATTCCCAATGGA	NA	circbase	NA	NA	NA	NA	NA	NA	NA	NA	NA	NA	NA	hsa_circ_0015680	chr1	185278134	185278643	-	509	299	NM_006469	IVNS1ABP
hsa_circ_0054181	5.98839	P	7.59633	P	0.328068	3.04815	down	circRNA	GTTTTTTAACACCTAAGTCTATCTTCATACCACAGGAAATGCATTCTACTGAGGATGAAA	NA	circbase	NA	NA	NA	NA	NA	NA	NA	NA	NA	NA	NA	hsa_circ_0054181	chr2	39476421	39515421	-	39000	2708	NM_003618	MAP4K3
hsa_circ_0015658	2.30245	A	3.77086	P	0.36138	2.76717	down	circRNA	ATAAGCACTGCATGGGATGTAAAAGTAGGCAAGCATCTAGACCGGCTTATGAATCTTCCG	NA	circbase	NA	NA	NA	NA	NA	NA	NA	NA	NA	NA	NA	hsa_circ_0015658	chr1	184774757	184777369	-	2612	595	NM_052966	FAM129A
hsa_circ_0060931	5.10302	P	3.49548	P	3.04732	3.04732	up	circRNA	ATTAGCAGAGCTTCAACTGCATTTGGCTCTTTGTTGGATGATGAGCACGTTTGGGAGGAT	NA	circbase	NA	NA	NA	NA	NA	NA	NA	NA	NA	NA	NA	hsa_circ_0060931	chr20	52773926	52781102	-	7176	702	NM_000782	CYP24A1
hsa_circ_0092282	3.08098	A	4.13738	P	0.48083	2.07974	down	circRNA	TCTGGGTGGGGGAAATAGAACATGATTTACCCACCCTAAAATGCATTGAAGGCATCAGAG	NA	circbase	NA	NA	NA	NA	NA	NA	NA	NA	NA	NA	NA	hsa_circ_0092282	chr1	28905232	28905532	-	300	300	NR_003077	SNORD99
hsa_circ_0072016	3.67396	P	2.62278	A	2.07223	2.07223	up	circRNA	CACGCCTCTCAATGTTCAACAGAAGAATTTTATTTATCTACGCCAGAAAACTACCACTAC	NA	circbase	NA	NA	NA	NA	NA	NA	NA	NA	NA	NA	NA	hsa_circ_0072016	chr5	16766188	16779757	-	13569	353	NM_012334	MYO10
hsa_circ_0047070	3.92359	P	2.34106	A	2.99496	2.99496	up	circRNA	TTTCTAAGTGGTTGACGAGATTAGAGAGATGGTTGACAATGATTTAGGTTTTCAACAGGC	NA	circbase	NA	NA	NA	NA	NA	NA	NA	NA	NA	NA	NA	hsa_circ_0047070	chr18	19109261	19116146	-	6885	1522	NM_052911	ESCO1
hsa_circ_0031285	7.83408	P	6.78544	P	2.06859	2.06859	up	circRNA	TGGGGGCTGGCCGCCCGGATGGCGACCCCAGCCTCGGCCCCAGACACACGGGCTCTGGTG	NA	circbase	NA	NA	NA	NA	NA	NA	NA	NA	NA	NA	NA	hsa_circ_0031285	chr14	23776968	23777408	+	440	440	NM_004050	BCL2L2
hsa_circ_0047199	3.38365	P	1.68799	A	3.23926	3.23926	up	circRNA	TCATTCCCTATTTGCCAAGCCTGCAGCTGTGACCCTGAGCATGCGGATGGCTGTGAACAG	NA	circbase	NA	NA	NA	NA	NA	NA	NA	NA	NA	NA	NA	hsa_circ_0047199	chr18	21355755	21364121	+	8366	330	NM_198129	LAMA3
hsa_circ_0076848	1.3938	A	4.49288	P	0.116704	8.5687	down	circRNA	TGGAGATAGCTCAACCGAACAAAAACTAAAGAAAGAGCTGGAACGACTTAAAGATGATTT	NA	circbase	NA	NA	NA	NA	NA	NA	NA	NA	NA	NA	NA	hsa_circ_0076848	chr6	56468634	56496187	-	27553	17278	NM_001723	DST
hsa_circ_0027088	7.00245	P	5.36738	P	3.10602	3.10602	up	circRNA	AGTTTATAGGATTCACAAGACAGTGATGATGAAAGCAGCCTGCTTCTGCAAAGTGGTACG	NA	circbase	NA	NA	NA	NA	NA	NA	NA	NA	NA	NA	NA	hsa_circ_0027088	chr12	57058559	57066849	-	8290	461	NM_006601	PTGES3
hsa_circ_0065353	3.32986	P	2.30002	A	2.04181	2.04181	up	circRNA	GAATCTGAAGCTTTCCTCAAATGAAAGAGATAGCAGTGAACCAGGGAATTTCATTCCTCT	NA	circbase	NA	NA	NA	NA	NA	NA	NA	NA	NA	NA	NA	hsa_circ_0065353	chr3	48219343	48219478	-	135	135	NM_001789	CDC25A
hsa_circ_0061628	3.29606	A	4.81749	P	0.348339	2.87077	down	circRNA	TGTAATGAATACCACTTATGTTTTCTCCAGGAAGAATCTTAAAAGCGGGAAGCGGCGCGC	NA	circbase	NA	NA	NA	NA	NA	NA	NA	NA	NA	NA	NA	hsa_circ_0061628	chr21	37757688	37781128	+	23440	965	NM_005441	CHAF1B
hsa_circ_0015672	4.31685	P	3.26492	A	2.07329	2.07329	up	circRNA	CTCCGTAAAGCTTTTCAGGATGTCCAGCAAAGAATCCTGTGGGAAAAAAGAGACATCTCA	NA	circbase	NA	NA	NA	NA	NA	NA	NA	NA	NA	NA	NA	hsa_circ_0015672	chr1	185129964	185175895	+	45931	1981	NM_017673	SWT1
hsa_circ_0050923	4.11977	P	5.41384	P	0.407799	2.45219	down	circRNA	ATAAAGCGTTAGCCCGCAGCGGTTCCATGTAAACCTGCTGTGCGGGGAGGAGCAGGGCTC	NA	circbase	NA	NA	NA	NA	NA	NA	NA	NA	NA	NA	NA	hsa_circ_0050923	chr19	39261607	39262670	-	1063	374	NM_002307	LGALS7
hsa_circ_0065191	9.76499	P	12.6608	M	0.13436	7.44268	down	circRNA	AGCATCTGGGACCGCAGCACAGGCATCAAGTTCTACTCCATTCAGCAGGGACCCCAGGGC	NA	circbase	NA	NA	NA	NA	NA	NA	NA	NA	NA	NA	NA	hsa_circ_0065191	chr3	47455669	47456483	-	814	455	NM_012235	SCAP
hsa_circ_0001152	8.6173	P	7.47539	P	2.20672	2.20672	up	circRNA	AAGCTGACAGGAAGTTGGAAATCTGTATGACATGTTCCACACTCGCAACTCTTTACACCG	NA	circbase	NA	NA	NA	NA	NA	NA	NA	NA	NA	NA	NA	hsa_circ_0001152	chr20	35539620	35540955	-	1335	208	NM_015474	SAMHD1
hsa_circ_0085104	3.89964	P	2.36307	A	2.90104	2.90104	up	circRNA	TGATGTGGAGAACAAATGCCCTGAGGTAGAGGAGTTGGTCTTCAGCCATTTTGTGATCTG	NA	circbase	NA	NA	NA	NA	NA	NA	NA	NA	NA	NA	NA	hsa_circ_0085104	chr8	100796542	100883925	+	87383	3966	NM_017890	VPS13B
hsa_circ_0091550	2.98336	A	4.50546	P	0.348179	2.87209	down	circRNA	TCTTGAAAAGAGGAGATGCTTGATGAGGAGACTAAGGTGTCAGTATGTTCTTCAAGCTGC	NA	circbase	NA	NA	NA	NA	NA	NA	NA	NA	NA	NA	NA	hsa_circ_0091550	chrX	130917914	130928494	-	10580	547	TCONS_l2_00030860	TCONS_l2_00030860
hsa_circ_0069816	3.74642	P	2.67407	A	2.10285	2.10285	up	circRNA	GTGTTAATCATCAGGGTGATTACAATTCAGAAATTCATCAGATCACAAGAGAAAGAGATG	NA	circbase	NA	NA	NA	NA	NA	NA	NA	NA	NA	NA	NA	hsa_circ_0069816	chr4	56846308	56851524	+	5216	384	NM_025009	CEP135
hsa_circ_0041682	5.96836	P	12.1991	M	0.0133154	75.1008	down	circRNA	GCCAAGTACATTTGCCATCTCTTGGAGCAAGAGCGACAACAACACAACCAGTTAAAACAT	NA	circbase	NA	NA	NA	NA	NA	NA	NA	NA	NA	NA	NA	hsa_circ_0041682	chr17	5253745	5289132	+	35387	4394	NM_004703	RABEP1
hsa_circ_0062597	4.75915	P	6.01629	P	0.418372	2.39022	down	circRNA	TTTTTTGGTTGCTTTTCTAATAAAGATGGAACAGTTGTGGATGAGGAGGCTGCGCTGGAG	NA	circbase	NA	NA	NA	NA	NA	NA	NA	NA	NA	NA	NA	hsa_circ_0062597	chr22	24564414	24574596	+	10182	1413	NM_001199281	CABIN1
hsa_circ_0087234	4.24517	P	5.34762	P	0.465724	2.1472	down	circRNA	TGGAAGCCAAGCATGGGACTCGCTGTGCTGGAGAAGTGGCAGCCGCTGCAAACAATTCGC	NA	circbase	NA	NA	NA	NA	NA	NA	NA	NA	NA	NA	NA	hsa_circ_0087234	chr9	78682870	78722267	+	39397	576	NM_001190482	PCSK5
hsa_circ_0011586	4.79084	P	3.14155	A	3.13679	3.13679	up	circRNA	GAAAAACATAGGAAGATGATGTAGAACAGCCATTTAATGACAGTGGCTGTCTTCTTGTGG	NA	circbase	NA	NA	NA	NA	NA	NA	NA	NA	NA	NA	NA	hsa_circ_0011586	chr1	36204736	36228922	-	24186	2848	NM_022111	CLSPN
hsa_circ_0010411	4.44861	P	6.93849	P	0.17802	5.61734	down	circRNA	GATCACTCAGGGCAATTTGCATATTTCTCCAAAGAACCATCCAGAACCTGAGCAGCCTGT	NA	circbase	NA	NA	NA	NA	NA	NA	NA	NA	NA	NA	NA	hsa_circ_0010411	chr1	20097800	20113610	-	15810	454	NM_181719	TMCO4
hsa_circ_0030784	7.58797	P	6.41299	P	2.25789	2.25789	up	circRNA	CACTGTGCTGGTTGCTGGTGTTGTCGGCCGTGCAGACCTCCTGTGTGCCCTGTTCTTCTT	NA	circbase	NA	NA	NA	NA	NA	NA	NA	NA	NA	NA	NA	hsa_circ_0030784	chr13	101294464	101308722	-	14258	189	NM_032813	TMTC4
hsa_circ_0023596	4.19253	P	1.94506	A	4.74849	4.74849	up	circRNA	ATAACAACCCTCTGGTGGCCCATACACGAGAGGTTGTGTTTTCATCTTACCCTGGATTTT	NA	circbase	NA	NA	NA	NA	NA	NA	NA	NA	NA	NA	NA	hsa_circ_0023596	chr11	74563033	74574066	-	11033	261	NM_182969	XRRA1
hsa_circ_0071218	4.69271	P	3.42817	A	2.40251	2.40251	up	circRNA	TCACTCTCTGATGGACCGCGACCTAATCAAAAAGAAATGCTTTCTCTACGAGCATTCTTG	NA	circbase	NA	NA	NA	NA	NA	NA	NA	NA	NA	NA	NA	hsa_circ_0071218	chr4	151752968	151818970	-	66002	2805	NM_001199282	LRBA
hsa_circ_0078294	6.12232	P	7.12827	P	0.497941	2.00827	down	circRNA	TGATGTTCAGTATTGGATACAAATGACCGATTTCTACGAAAAATAACCATCGGGCAGGGA	NA	circbase	NA	NA	NA	NA	NA	NA	NA	NA	NA	NA	NA	hsa_circ_0078294	chr6	151277130	151336829	+	59699	860	NM_001242767	MTHFD1L
hsa_circ_0067076	3.29911	P	4.41314	P	0.462003	2.16449	down	circRNA	TGCATACAATGTCTCAACATATGCACTAGTGGAAGTGCCACCTCATGTGAAGAATGTCTG	NA	circbase	NA	NA	NA	NA	NA	NA	NA	NA	NA	NA	NA	hsa_circ_0067076	chr3	124536467	124592378	-	55911	1058	NM_002213	ITGB5
hsa_circ_0017793	4.55079	P	5.74196	P	0.437947	2.28338	down	circRNA	ATGCAAGACGCGTGACTGTGAGTACTGTCAGTACCATGTCCAGGCTCAGTACAAGAAGCT	NA	circbase	NA	NA	NA	NA	NA	NA	NA	NA	NA	NA	NA	hsa_circ_0017793	chr10	13230880	13243534	+	12654	1137	NM_182751	MCM10
hsa_circ_0004968	2.8412	A	4.11382	P	0.413907	2.416	down	circRNA	TAATGGAATTGGAGTCAGCAGAACTGAAATAGGTGATGGATGTGGACACACTGTACTAGG	NA	circbase	NA	NA	NA	NA	NA	NA	NA	NA	NA	NA	NA	hsa_circ_0004968	chr3	98600383	98600611	-	228	228	NM_080927	DCBLD2
hsa_circ_0018494	3.5989	P	7.03103	P	0.0926455	10.7938	down	circRNA	CCTCAGTGACGTTTACAACAGACTGCCATAGGCAACACACTGGTCCAGGACATCTGTTAT	NA	circbase	NA	NA	NA	NA	NA	NA	NA	NA	NA	NA	NA	hsa_circ_0018494	chr10	70048687	70048776	-	89	89	NM_022129	PBLD
hsa_circ_0089524	2.62286	A	3.66437	P	0.485821	2.05837	down	circRNA	CTGAAAAATAAAGTCGGCCAAGTGAGTGTGGACCATCGGTGACCGCATGGGGGAGGCCAA	NA	circbase	NA	NA	NA	NA	NA	NA	NA	NA	NA	NA	NA	hsa_circ_0089524	chr9	139230422	139254057	+	23635	3123	NM_001145638	GPSM1
hsa_circ_0066730	3.94417	P	2.75786	A	2.27571	2.27571	up	circRNA	TTTGCCTTCCTGGAAAATGAGTGTTTTCAGTCTCTCCGGGTTGCATGTACTGTATGTGGA	NA	circbase	NA	NA	NA	NA	NA	NA	NA	NA	NA	NA	NA	hsa_circ_0066730	chr3	107241782	107245245	+	3463	244	NM_001142568	BBX
hsa_circ_0010871	3.65698	P	2.41172	A	2.37062	2.37062	up	circRNA	TAAACACTTGGATCTGGGGTGCTGCCAGGAAAAAGCAAATTCTGGAAGTTAATGGTTTTG	NA	circbase	NA	NA	NA	NA	NA	NA	NA	NA	NA	NA	NA	hsa_circ_0010871	chr1	23884420	23886285	-	1865	1239	NM_002167	ID3
hsa_circ_0027972	4.46349	P	5.89898	P	0.369721	2.70474	down	circRNA	GACAAGAGTGGTGGCATAGCAGGACAACGTCTGTCTGAACATCCTGACATCCGCAAACTT	NA	circbase	NA	NA	NA	NA	NA	NA	NA	NA	NA	NA	NA	hsa_circ_0027972	chr12	105428077	105433584	-	5507	293	NM_001034173	ALDH1L2
hsa_circ_0074592	3.35997	P	4.62247	P	0.416819	2.39912	down	circRNA	TGAGATCTTGCTGAAGGGAACTGTGCGCCCAGCCAATGACTTCAACCCTGACGCAGATGC	NA	circbase	NA	NA	NA	NA	NA	NA	NA	NA	NA	NA	NA	hsa_circ_0074592	chr5	150490187	150503928	-	13741	534	NM_001155	ANXA6
hsa_circ_0081463	5.80351	P	10.4348	M	0.0403509	24.7826	down	circRNA	AAAGCAAGAACAAGGCCCGCTGGGAAACCCAGAGCAGCATCTCTCTCATCCTGGAAGGCT	NA	circbase	NA	NA	NA	NA	NA	NA	NA	NA	NA	NA	NA	hsa_circ_0081463	chr7	99950383	99952863	+	2480	1080	NR_036569	PILRB
hsa_circ_0043450	3.75462	P	2.45738	A	2.45757	2.45757	up	circRNA	TGGAGCTGTGGAATTTGTTGTCCTCGTTATGGAGAAAGAAGACAAACAGAAAGCGACTGG	NA	circbase	NA	NA	NA	NA	NA	NA	NA	NA	NA	NA	NA	hsa_circ_0043450	chr17	37649003	37667883	+	18880	660	NM_016507	CDK12
hsa_circ_0083669	5.09284	P	6.36915	P	0.412852	2.42217	down	circRNA	GCAGAAGAAGAACCTGAATATCCAGGTGGAGGACATTCGGATTCGAGCCATCCTCTCAAC	NA	circbase	NA	NA	NA	NA	NA	NA	NA	NA	NA	NA	NA	hsa_circ_0083669	chr8	23179642	23198716	-	19074	771	NM_002318	LOXL2
hsa_circ_0027896	4.79751	P	3.07038	A	3.31068	3.31068	up	circRNA	GGCCCTGGAGGATCAGCAAGTTTATGAAAGACAAAGAACAAAGTTCTGTACTCATTACGC	NA	circbase	NA	NA	NA	NA	NA	NA	NA	NA	NA	NA	NA	hsa_circ_0027896	chr12	101734300	101779506	+	45206	4189	NM_014503	UTP20
hsa_circ_0071911	5.74518	P	6.88906	P	0.452543	2.20974	down	circRNA	TTTGAGAGGAGTGCCAAGCAGGTCAGCCAAGATGGGAAGTCGCTCCTTGACAAGCTCCAG	NA	circbase	NA	NA	NA	NA	NA	NA	NA	NA	NA	NA	NA	hsa_circ_0071911	chr5	14316621	14378236	+	61615	1947	NM_007118	TRIO
hsa_circ_0037098	4.86763	P	3.67943	P	2.27867	2.27867	up	circRNA	AAGTCTCAACTTCTGGCAAAGAAGAGCATCCCCTTAGTGCAGGTGCTGCGGACTACGGCC	NA	circbase	NA	NA	NA	NA	NA	NA	NA	NA	NA	NA	NA	hsa_circ_0037098	chr15	101910539	101910728	-	189	189	NM_002570	PCSK6
hsa_circ_0037427	4.84575	P	6.39895	P	0.340754	2.93467	down	circRNA	TTCATCACTAAGGTTTAATCAGTACATCGTGTGTCTGGCCCATCACGTCATAGCCATGTG	NA	circbase	NA	NA	NA	NA	NA	NA	NA	NA	NA	NA	NA	hsa_circ_0037427	chr16	2126068	2126171	+	103	103	NM_000548	TSC2
hsa_circ_0030709	3.32969	A	6.02311	P	0.154596	6.46847	down	circRNA	CCATTTCAACGAGAGTGCAAGAGAAGCAGAAATCAAACTGAAAAGTGAAAGCAGAGTCAA	NA	circbase	NA	NA	NA	NA	NA	NA	NA	NA	NA	NA	NA	hsa_circ_0030709	chr13	99476651	99556960	-	80309	4170	NM_001130048	DOCK9
hsa_circ_0082603	2.99342	A	5.85543	P	0.137547	7.27027	down	circRNA	ATGCTAAATATTTACGGACCACATTACAGATCTGGGTCATATGGTGTTCTGGCTTGCGGG	NA	circbase	NA	NA	NA	NA	NA	NA	NA	NA	NA	NA	NA	hsa_circ_0082603	chr7	138314793	138333882	-	19089	329	NM_001139456	SVOPL
hsa_circ_0013613	2.05762	A	3.46104	P	0.37803	2.64529	down	circRNA	CTTCTGCTATAATGTCAAAACTGGACCAATGGGGCCAGGCTGAAGTATTGAACTTTCTGC	NA	circbase	NA	NA	NA	NA	NA	NA	NA	NA	NA	NA	NA	hsa_circ_0013613	chr1	114442030	114443022	-	992	992	NM_006594	AP4B1
hsa_circ_0027229	1.11124	A	5.1372	P	0.0613853	16.2905	down	circRNA	TTAAATGAAATTGTATTTTGCCCATTTCACGTGGCATTAGGGGAGAGGACAGCCCCGGAT	NA	circbase	NA	NA	NA	NA	NA	NA	NA	NA	NA	NA	NA	hsa_circ_0027229	chr12	57623827	57628718	+	4891	2256	NM_001166358	SHMT2
hsa_circ_0067183	7.26601	P	8.4823	P	0.430389	2.32348	down	circRNA	GGAGTTAGCCAAGAGCCAGGACAAGACTCTCAAGCTCCATCTTTCTAGTCCCCACCTTCC	NA	circbase	NA	NA	NA	NA	NA	NA	NA	NA	NA	NA	NA	hsa_circ_0067183	chr3	127413817	127541701	-	127884	1356	NM_007283	MGLL
hsa_circ_0066575	3.52527	P	2.16094	A	2.57457	2.57457	up	circRNA	TGTAAAATTGGCCGTTATGGAACACCTGAAGAGCTACAAGAACTGGTAGACACAGCTCAT	NA	circbase	NA	NA	NA	NA	NA	NA	NA	NA	NA	NA	NA	hsa_circ_0066575	chr3	81538849	81692141	-	153292	2035	NM_000158	GBE1
hsa_circ_0072707	3.86684	P	2.52968	A	2.52654	2.52654	up	circRNA	CTGGAGAATGGTTCTCAAACCATTGGATGTGAAAACCAAATTTTACAATGCAGAGACTGA	NA	circbase	NA	NA	NA	NA	NA	NA	NA	NA	NA	NA	NA	hsa_circ_0072707	chr5	64948327	64954328	+	6001	197	NM_001093755	C5orf44
hsa_circ_0064190	4.47261	P	5.54877	P	0.474289	2.10842	down	circRNA	TGTAAGAAGTGTAGCCCTGGCTATCAGCAGGTGGGCTCCAAGTGTCTCGACTGTGCCAAG	NA	circbase	NA	NA	NA	NA	NA	NA	NA	NA	NA	NA	NA	hsa_circ_0064190	chr3	9984760	9984856	+	96	96	NM_015513	CRELD1
hsa_circ_0031700	3.90248	P	5.99099	P	0.235124	4.25308	down	circRNA	GCCTCCCAAGTGGCCAATGAAAAAGTTCAAAATTTACACAAATCTTTATCTCAAGAAGAA	NA	circbase	NA	NA	NA	NA	NA	NA	NA	NA	NA	NA	NA	hsa_circ_0031700	chr14	37969112	37969343	+	231	231	NM_001195296	MIPOL1
hsa_circ_0058535	2.70269	A	3.77017	P	0.47715	2.09578	down	circRNA	TCAGCTGATGTGACAAAATCGCCACTGGGTCCTTTGATAAAACTTGTAAACTCTGGAGTG	NA	circbase	NA	NA	NA	NA	NA	NA	NA	NA	NA	NA	NA	hsa_circ_0058535	chr2	228762897	228771968	+	9071	533	NM_178821	WDR69
hsa_circ_0024952	5.65444	P	4.61695	P	2.05266	2.05266	up	circRNA	TTTTACGCCTCTACTCAGAAAATGACCGACTGAGAATCAGGCGAACAGTTGTCTCCAAAC	NA	circbase	NA	NA	NA	NA	NA	NA	NA	NA	NA	NA	NA	hsa_circ_0024952	chr12	520912	527802	+	6890	375	NM_032358	CCDC77
hsa_circ_0090585	6.58111	P	2.55015	A	16.3471	16.3471	up	circRNA	CCAGGAGAAGGGAAATGGCTCATTCCAAGACTAGCTTTTCATGGGCAACCCCTTTCCATC	NA	circbase	NA	NA	NA	NA	NA	NA	NA	NA	NA	NA	NA	hsa_circ_0090585	chrX	50341265	50351184	-	9919	1255	NM_020717	SHROOM4
hsa_circ_0026586	4.49441	P	6.43988	P	0.25963	3.85163	down	circRNA	CAGGATGGAGGACTCTGCGAGACAGCCTCAGTGGCTGGGACCCGGAGACCCTGGCCCTCC	NA	circbase	NA	NA	NA	NA	NA	NA	NA	NA	NA	NA	NA	hsa_circ_0026586	chr12	53670403	53684253	+	13850	3664	NM_012291	ESPL1
hsa_circ_0036451	8.03457	P	6.39135	P	3.1236	3.1236	up	circRNA	TAACATAAAGCTTTCTTAATGCAAGCGTGATGAGAGGCTGGACCTACAGTGGAGTCTGGA	NA	circbase	NA	NA	NA	NA	NA	NA	NA	NA	NA	NA	NA	hsa_circ_0036451	chr15	78575577	78585130	-	9553	968	NM_025234	WDR61
hsa_circ_0047858	4.1959	P	3.03479	A	2.23628	2.23628	up	circRNA	ACAGTTCAAGCTGTTCTTGAAGACTAATTAGTTACACTGGATATGCTGCTGTTCTTTACT	NA	circbase	NA	NA	NA	NA	NA	NA	NA	NA	NA	NA	NA	hsa_circ_0047858	chr18	59806215	59828618	-	22403	1148	NM_176787	PIGN
hsa_circ_0019878	3.40972	P	4.72642	P	0.40145	2.49097	down	circRNA	TTCTTCGAGGCTCGACCCGAGGATGTCAACCCTCCAAAAGAGCACTTGTCCGGCTGCCCC	NA	circbase	NA	NA	NA	NA	NA	NA	NA	NA	NA	NA	NA	hsa_circ_0019878	chr10	105484027	105484119	-	92	92	NM_014631	SH3PXD2A
hsa_circ_0056901	5.50258	P	1.12016	A	20.8564	20.8564	up	circRNA	CTAAGTTGTAGTGGATCGTATGTCTTTCCCATGCGGCTGCACTAAAGAAGGATGTAGTAA	NA	circbase	NA	NA	NA	NA	NA	NA	NA	NA	NA	NA	NA	hsa_circ_0056901	chr2	166535210	166545917	+	10707	10707	NM_001172173	CSRNP3
hsa_circ_0040588	3.95708	P	1.09218	A	7.28484	7.28484	up	circRNA	ACTCAGGATGCCAGGTGGCACTCGGAGACACATGTGTTGAGGATGTAGCATTCCAGGCTG	NA	circbase	NA	NA	NA	NA	NA	NA	NA	NA	NA	NA	NA	hsa_circ_0040588	chr16	81193228	81208519	-	15291	1311	NM_052892	PKD1L2
hsa_circ_0079672	1.11247	A	4.17555	P	0.119652	8.35756	down	circRNA	CAGCAAGCGGATTTATGAGGAATCCAAGATGAATTTGGAGCAGGAGAGGCCGTTTGTCTG	NA	circbase	NA	NA	NA	NA	NA	NA	NA	NA	NA	NA	NA	hsa_circ_0079672	chr7	28527792	28547355	+	19563	288	NM_182898	CREB5
hsa_circ_0004590	2.46934	A	3.64184	P	0.443654	2.25401	down	circRNA	AAACGAAAAAGATTTACACTGACTGGGCCAACCACTACCTAGCAAAATCAGGCCACAAGC	NA	circbase	NA	NA	NA	NA	NA	NA	NA	NA	NA	NA	NA	hsa_circ_0004590	chr12	78334098	78392256	+	58158	637	NM_014903	NAV3
hsa_circ_0000082	3.57215	P	2.30905	A	2.40012	2.40012	up	circRNA	AAGTCCAGGATACTCATTCTTACCTGACCCTCGATGAACCAATGAATAACATCACCACGT	NA	circbase	NA	NA	NA	NA	NA	NA	NA	NA	NA	NA	NA	hsa_circ_0000082	chr1	64515362	64516388	+	1026	319	NM_005012	ROR1
hsa_circ_0088749	5.71686	P	3.08321	A	6.20591	6.20591	up	circRNA	AACCAGATGAACAAGAAGAAGACTTCAGGGAACCAGGTCATGCTTCTCATCGATATCGAG	NA	circbase	NA	NA	NA	NA	NA	NA	NA	NA	NA	NA	NA	hsa_circ_0088749	chr9	131001723	131002058	+	335	123	NM_001005336	DNM1
hsa_circ_0091305	3.85383	P	6.41518	P	0.169418	5.90256	down	circRNA	TCCAGGACCAAAGGTGACAAAGGTGACACTTGCTTCAACTGCATTGGAACTGGTATTTCA	NA	circbase	NA	NA	NA	NA	NA	NA	NA	NA	NA	NA	NA	hsa_circ_0091305	chrX	107838738	107846291	+	7553	821	NM_033380	COL4A5
hsa_circ_0058771	3.23608	P	1.1115	A	4.36074	4.36074	up	circRNA	CACACCTCGGGTTCACACATCGTGTAAAGAATCCTTGCTGACCAAGTGCCCACTTGGCCT	NA	circbase	NA	NA	NA	NA	NA	NA	NA	NA	NA	NA	NA	hsa_circ_0058771	chr2	234346022	234347025	+	1003	266	NM_152879	DGKD
hsa_circ_0056885	1.28298	A	3.81301	P	0.173136	5.77582	down	circRNA	GGTTTATGAAGTTCATAACTCTGAAGAAAATACAATGAGAGCACTCACACTGAAGGATAT	NA	circbase	NA	NA	NA	NA	NA	NA	NA	NA	NA	NA	NA	hsa_circ_0056885	chr2	163075572	163083131	-	7559	516	NM_004460	FAP
hsa_circ_0042905	7.43801	P	1.12287	A	79.6243	79.6243	up	circRNA	CTGGAAATGTGAAATTGGTTTCAAGCAAGCTCACAAATGCTTTTTTACATCTGCAAGAAA	NA	circbase	NA	NA	NA	NA	NA	NA	NA	NA	NA	NA	NA	hsa_circ_0042905	chr17	29550461	29663491	+	113030	4426	NM_001042492	NF1
hsa_circ_0035003	4.01	P	2.77511	A	2.35363	2.35363	up	circRNA	TGATGCCCAGGCACAGGCATCTGCAGGCTCACAGTGCACAGGGCTGTTCAGCACCACAGT	NA	circbase	NA	NA	NA	NA	NA	NA	NA	NA	NA	NA	NA	hsa_circ_0035003	chr15	43850992	43857190	-	6198	327	NM_001130858	PPIP5K1
hsa_circ_0001382	3.84124	P	5.03809	P	0.436226	2.29239	down	circRNA	AAGTGTACGATCAAGGCCCAGGAGGCTGACGCCATCACTCTGGATGGAGGAGCCATCTAT	NA	circbase	NA	NA	NA	NA	NA	NA	NA	NA	NA	NA	NA	hsa_circ_0001382	chr3	196753530	196753630	-	100	100	NM_033316	MFI2
hsa_circ_0087214	7.27069	P	6.22995	P	2.05728	2.05728	up	circRNA	TTGCAGAGAAGCTTCATCAAGCCATGAAAGCCTTGTATGAAGCAGGAGAAAGGAGAAAGG	NA	circbase	NA	NA	NA	NA	NA	NA	NA	NA	NA	NA	NA	hsa_circ_0087214	chr9	75780031	75782471	+	2440	249	NM_000700	ANXA1
hsa_circ_0069789	4.9696	P	3.50326	A	2.7632	2.7632	up	circRNA	TGCTGACAAAGAAATGTGCACTGTTGAAGAACCCAATGAAGAGTTTACATCTAGACATAG	NA	circbase	NA	NA	NA	NA	NA	NA	NA	NA	NA	NA	NA	hsa_circ_0069789	chr4	56319220	56322467	-	3247	414	NM_004898	CLOCK
hsa_circ_0073873	1.78448	A	4.52911	P	0.149205	6.70218	down	circRNA	GAGGGGAACTTCCAGCAGACATCCTTGTGGAACCAGCGTTGTTTTTCCTTGGCAGCTGCG	NA	circbase	NA	NA	NA	NA	NA	NA	NA	NA	NA	NA	NA	hsa_circ_0073873	chr5	131549608	131562954	-	13346	1052	NM_004199	P4HA2
hsa_circ_0069538	4.69487	P	3.68685	P	2.01115	2.01115	up	circRNA	TTTGATGTAAAGTACTTAGGAGAAGCACATGAATGGAACCAGAATCGTGGTCTTTTTACT	NA	circbase	NA	NA	NA	NA	NA	NA	NA	NA	NA	NA	NA	hsa_circ_0069538	chr4	40098846	40108644	+	9798	1612	NM_018177	N4BP2
hsa_circ_0046744	6.95071	P	5.92246	P	2.03956	2.03956	up	circRNA	GACAAAATAGGTTATAGTTGAAGTCCTGCCTAATCAACCTGTGAAGTTAGTACCTAAAAT	NA	circbase	NA	NA	NA	NA	NA	NA	NA	NA	NA	NA	NA	hsa_circ_0046744	chr18	2762102	2796519	+	34417	1559	NM_015295	SMCHD1
hsa_circ_0083273	2.06298	A	3.67185	P	0.327856	3.05012	down	circRNA	TGCTGTAGAGCATTTCCATTTATAAAAGCAGTCAAGGCTCCAAGAAAGTGAGACTTCAGC	NA	circbase	NA	NA	NA	NA	NA	NA	NA	NA	NA	NA	NA	hsa_circ_0083273	chr8	1877451	1882108	+	4657	301	NM_014629	ARHGEF10
hsa_circ_0062434	4.21353	P	2.05372	A	4.46857	4.46857	up	circRNA	TAGGCAGCATTGGTTACGTTTTTCTCTCGTCCCAGCTGTGTGGACAGTGCCACACGCCCT	NA	circbase	NA	NA	NA	NA	NA	NA	NA	NA	NA	NA	NA	hsa_circ_0062434	chr22	22064775	22065197	-	422	422	NM_013313	YPEL1
hsa_circ_0055077	2.98741	A	4.06308	P	0.474448	2.10771	down	circRNA	TTCCTCTTCAAGTACCTGATGCACCAGGTTTAAACTTACACGAATCGCTTTCTGGAGGAG	NA	circbase	NA	NA	NA	NA	NA	NA	NA	NA	NA	NA	NA	hsa_circ_0055077	chr2	69723116	69870406	-	147290	2599	NM_014911	AAK1
hsa_circ_0062322	4.02504	P	2.91653	A	2.15623	2.15623	up	circRNA	TACAAGAGACACTGGTGGCTGCCTGCCAGCTTCAGGCCACAGTTGTAAGGGATCTTGTGG	NA	circbase	NA	NA	NA	NA	NA	NA	NA	NA	NA	NA	NA	hsa_circ_0062322	chr22	20825636	20843531	-	17895	426	NM_032775	KLHL22
hsa_circ_0064240	7.61775	P	12.0371	M	0.0467359	21.3968	down	circRNA	TGTGGAGAGACAGCATAACGGAAACTTGGAGGAGATTGATGGTCTACTAGATTGGTGTCT	NA	circbase	NA	NA	NA	NA	NA	NA	NA	NA	NA	NA	NA	hsa_circ_0064240	chr3	10107077	10107178	+	101	101	NM_033084	FANCD2
hsa_circ_0085495	5.94888	P	7.03439	P	0.471225	2.12213	down	circRNA	TACACATTTGTATTCATCCACAATGCGATACCTTTCATAGGGTTTGGCTTTTTGGATAAT	NA	circbase	NA	NA	NA	NA	NA	NA	NA	NA	NA	NA	NA	hsa_circ_0085495	chr8	125332326	125339662	-	7336	272	NM_194291	TMEM65
hsa_circ_0028285	4.19911	P	5.22253	P	0.491946	2.03274	down	circRNA	TCCAGGGAGAGTCGCTGCAGCCTCAGCCTCACCATGTGTGTCAGGAGCTGTTTCCAGTCC	NA	circbase	NA	NA	NA	NA	NA	NA	NA	NA	NA	NA	NA	hsa_circ_0028285	chr12	112130500	112130700	+	200	200	NM_001136538	ACAD10
hsa_circ_0010754	6.18374	P	3.37588	A	7.00243	7.00243	up	circRNA	CTGCCGGCCAGGCTGCCAGCATCACACGGAGGGCCCTCGGTGTGAGCAGTGCCAGCCAGG	NA	circbase	NA	NA	NA	NA	NA	NA	NA	NA	NA	NA	NA	hsa_circ_0010754	chr1	22200898	22201026	-	128	128	NM_005529	HSPG2
hsa_circ_0004152	6.80375	P	1.10033	A	52.1075	52.1075	up	circRNA	AACCCTTCAGTCTACATCGGTAAACTCTGCAAAACTCCAGCAGTTACAGAGCCTGTGCTA	NA	circbase	NA	NA	NA	NA	NA	NA	NA	NA	NA	NA	NA	hsa_circ_0004152	chr4	77916933	77941823	+	24890	1570	NM_018243	11-Sep
hsa_circ_0060928	3.27918	P	1.1261	A	4.44778	4.44778	up	circRNA	TACGCCTCAGGGACACCTCAAAATCCCTGAACCCAAATTATCTGGACTTCAACTTTTTGG	NA	circbase	NA	NA	NA	NA	NA	NA	NA	NA	NA	NA	NA	hsa_circ_0060928	chr20	52773707	52788492	-	14785	1389	NM_000782	CYP24A1
hsa_circ_0016238	3.40302	P	1.89199	A	2.85014	2.85014	up	circRNA	TTTGCTTCTGTTTGGAGGTGCTCCAGGCCACATGCAGACGGACTCTGGAAGTGGCAAGGA	NA	circbase	NA	NA	NA	NA	NA	NA	NA	NA	NA	NA	NA	hsa_circ_0016238	chr1	206653789	206670223	+	16434	1556	NM_014002	IKBKE
hsa_circ_0088867	6.10365	P	3.24308	A	7.263	7.263	up	circRNA	AATTCAGCATGATGTTTAAGTAAACTCCCTTGGTGAAACAGCAGAGCGCCTGATCCAGTC	NA	circbase	NA	NA	NA	NA	NA	NA	NA	NA	NA	NA	NA	hsa_circ_0088867	chr9	131367574	131394763	+	27189	3149	NM_001130438	SPTAN1
hsa_circ_0057619	1.55002	A	5.95134	P	0.0473229	21.1314	down	circRNA	TACACAGAGGGGTGTGGAATCCATAGCATGTTCCCTTTACATTTAGCTGCCCTAAATGCT	NA	circbase	NA	NA	NA	NA	NA	NA	NA	NA	NA	NA	NA	hsa_circ_0057619	chr2	197872529	197954756	-	82227	1030	NM_001195144	ANKRD44
hsa_circ_0028308	6.66641	P	8.39951	P	0.300806	3.3244	down	circRNA	TTTGGAGATGTGCAGGATGGCATGACCATCGCCAAGGAGGAGATTGGCCGCGTAATCCAG	NA	circbase	NA	NA	NA	NA	NA	NA	NA	NA	NA	NA	NA	hsa_circ_0028308	chr12	112229864	112236046	+	6182	453	NM_000690	ALDH2
hsa_circ_0045864	4.21301	P	2.04301	A	4.50023	4.50023	up	circRNA	AAGAGTGGAGCTGGACTGAACCCAAACATGAATGTCAACAGCATGGACATGACCGGTGGC	NA	circbase	NA	NA	NA	NA	NA	NA	NA	NA	NA	NA	NA	hsa_circ_0045864	chr17	76087520	76089844	+	2324	504	NM_001142640	TNRC6C
hsa_circ_0018775	4.41793	P	2.88118	A	2.90139	2.90139	up	circRNA	GCAGACAGAAAGTTGGAAAGGCTCCTGGGTAAATTTGGACAGGATGCACAAAGAATAGAA	NA	circbase	NA	NA	NA	NA	NA	NA	NA	NA	NA	NA	NA	hsa_circ_0018775	chr10	74881932	74886585	+	4653	635	NM_015901	NUDT13
hsa_circ_0047852	4.05964	P	2.6568	A	2.64423	2.64423	up	circRNA	GCAACATTAGGTTCTCAGTTTTTTCTACCGCTATATGCTTACCGCTGGACTTACTGCCTT	NA	circbase	NA	NA	NA	NA	NA	NA	NA	NA	NA	NA	NA	hsa_circ_0047852	chr18	59768307	59774114	-	5807	403	NM_176787	PIGN
hsa_circ_0007657	4.10712	P	2.52812	A	2.98763	2.98763	up	circRNA	GCGAGCGGAAGATTTACTTGGCAATTGAAAATTGATGAGCAAATTGAAAGCATGTTTAAT	NA	circbase	NA	NA	NA	NA	NA	NA	NA	NA	NA	NA	NA	hsa_circ_0007657	chr5	134152119	134154694	+	2575	538	NM_014829	DDX46
hsa_circ_0058266	5.75959	P	8.1107	P	0.195996	5.10216	down	circRNA	ATTCATCATCCTGAGTTGATGGCTTCCGGAGAACTGGCATAGCTGCAGAATATGAGTAGT	NA	circbase	NA	NA	NA	NA	NA	NA	NA	NA	NA	NA	NA	hsa_circ_0058266	chr2	219410943	219427536	-	16593	909	NM_020935	USP37
hsa_circ_0042829	3.55407	P	2.49529	A	2.08316	2.08316	up	circRNA	ACCATGGCCACAAAGGACTGAATTCGGAGAAGGTAGCTGCTCTGATACAGAAACTGAATT	NA	circbase	NA	NA	NA	NA	NA	NA	NA	NA	NA	NA	NA	hsa_circ_0042829	chr17	28593902	28618526	-	24624	1203	NM_000386	BLMH
hsa_circ_0079700	3.73869	P	2.7062	A	2.04555	2.04555	up	circRNA	CTGACCAAATACAAAATTGTGACCTATTTGGGACTCAGCGTAAACCAGATCACTGACGGT	NA	circbase	NA	NA	NA	NA	NA	NA	NA	NA	NA	NA	NA	hsa_circ_0079700	chr7	30487913	30487997	-	84	84	NM_006092	NOD1
hsa_circ_0046671	9.03279	P	7.99732	P	2.04979	2.04979	up	circRNA	CTGAACTCTAGATTTCCAGGTCCCAGATGAAGAGATAATTCTACTTACTGGATATAGGAT	NA	circbase	NA	NA	NA	NA	NA	NA	NA	NA	NA	NA	NA	hsa_circ_0046671	chr18	649619	649964	-	345	345	NM_001012716	C18orf56
hsa_circ_0039040	1.241	A	11.4287	M	0.000857402	1166.31	down	circRNA	AAAGATCTATTCACTGAGCTGCAGAAGAAGATCTATGTCATTGAGGGGTCATCGTGGGAG	NA	circbase	NA	NA	NA	NA	NA	NA	NA	NA	NA	NA	NA	hsa_circ_0039040	chr16	30486626	30495584	+	8958	842	NM_002209	ITGAL
hsa_circ_0069244	3.33784	P	2.15654	A	2.26782	2.26782	up	circRNA	CTACCTCAGGGATAGTGACAACCTCTGGTGGGACGCCTTTGCCACTGAATTTTTTGAAGA	NA	circbase	NA	NA	NA	NA	NA	NA	NA	NA	NA	NA	NA	hsa_circ_0069244	chr4	16587544	16760883	-	173339	483	NM_001130834	LDB2
hsa_circ_0082767	6.6846	P	4.7835	P	3.73498	3.73498	up	circRNA	TTCAGGATGGGTGTGGAATATCAAACAAATGATTAAGTTGACACAGGAACATATAGAGGC	NA	circbase	NA	NA	NA	NA	NA	NA	NA	NA	NA	NA	NA	hsa_circ_0082767	chr7	140508691	140550012	-	41321	470	NM_004333	BRAF
hsa_circ_0015272	4.24055	P	3.1252	A	2.16647	2.16647	up	circRNA	TAACTTTCAAGAGGTGTACCAACATTCGACCAGGAGAGACTGGAATGGATGTAACAAGCC	NA	circbase	NA	NA	NA	NA	NA	NA	NA	NA	NA	NA	NA	hsa_circ_0015272	chr1	173702851	173703425	+	574	574	NM_014458	KLHL20
hsa_circ_0024083	3.53085	P	2.46822	A	2.08874	2.08874	up	circRNA	CTGATTTGAGGTTAATGTGTTAAGAGCCATTGACATTTGAAGATCATCAGAAGTGAAGAT	NA	circbase	NA	NA	NA	NA	NA	NA	NA	NA	NA	NA	NA	hsa_circ_0024083	chr11	95621319	95647476	-	26157	177	NM_001243571	MTMR2
hsa_circ_0027835	5.6484	P	4.50652	P	2.20669	2.20669	up	circRNA	AGATGAAAAGGATCTACATAAGAAGATAATCACTCAGTTTCAGAGATATCACCAGCCGCA	NA	circbase	NA	NA	NA	NA	NA	NA	NA	NA	NA	NA	NA	hsa_circ_0027835	chr12	99061290	99064864	+	3574	246	NM_181861	APAF1
hsa_circ_0046722	5.18411	P	3.90563	P	2.42584	2.42584	up	circRNA	ACCCCTATTGATTTCTATGTTTGAAAAAGGGAAGGTACCTAAGATTGTCAACCTAAGGGA	NA	circbase	NA	NA	NA	NA	NA	NA	NA	NA	NA	NA	NA	hsa_circ_0046722	chr18	2697828	2707643	+	9815	1015	NM_015295	SMCHD1
hsa_circ_0039351	3.42092	P	1.15881	A	4.79695	4.79695	up	circRNA	GGTTGCATATGTTTGGAAATAATAATAACTATATGAATATGGCTGAGGCGAACAATGCGT	NA	circbase	NA	NA	NA	NA	NA	NA	NA	NA	NA	NA	NA	hsa_circ_0039351	chr16	52497845	52502486	-	4641	321	NM_001080430	TOX3
hsa_circ_0029682	3.99283	P	6.21415	P	0.214445	4.6632	down	circRNA	CCTCCAAATTCCTTCAAAAGTATGTTCGGGAACAGATTCTACTAGCAGTAGCAGTAATTG	NA	circbase	NA	NA	NA	NA	NA	NA	NA	NA	NA	NA	NA	hsa_circ_0029682	chr13	21417033	21429904	-	12871	410	NM_022459	XPO4
hsa_circ_0080280	6.99001	P	7.99671	P	0.497683	2.00931	down	circRNA	TGCAATTGTGTATCTCAGACCTGCAGGTCCTGGCTCTGGCATCCGAGAGAGACTGGAGCA	NA	circbase	NA	NA	NA	NA	NA	NA	NA	NA	NA	NA	NA	hsa_circ_0080280	chr7	56142278	56148365	+	6087	1582	NM_015411	SUMF2
hsa_circ_0049639	9.10426	P	10.1914	P	0.470706	2.12447	down	circRNA	AATTAAATTTTGTGTCTCCACGGGTGGACTTCCCGCTGGATCGAATCCAAACACAAGTCA	NA	circbase	NA	NA	NA	NA	NA	NA	NA	NA	NA	NA	NA	hsa_circ_0049639	chr19	13049947	13055304	+	5357	1740	NM_004343	CALR
hsa_circ_0041024	3.41363	P	1.81174	A	3.0354	3.0354	up	circRNA	TTCTTGTCAACGCACTGATGGATTTCCACCAAAGCATATTCAGGAGGCCTTACTACGTGT	NA	circbase	NA	NA	NA	NA	NA	NA	NA	NA	NA	NA	NA	hsa_circ_0041024	chr16	89824984	89845411	-	20427	1266	NM_000135	FANCA
hsa_circ_0032812	1.24269	A	3.73124	P	0.178185	5.61215	down	circRNA	ATGATGAAGACTTTGTTGAATGTGAGCCGAGTACAGGCCGGCAGTTAACCATCTTCAACA	NA	circbase	NA	NA	NA	NA	NA	NA	NA	NA	NA	NA	NA	hsa_circ_0032812	chr14	80163972	80271533	+	107561	387	NM_004796	NRXN3
hsa_circ_0006855	4.32918	P	5.59794	P	0.415017	2.40954	down	circRNA	TCTTGGCTGGAAGGTTGCACTCCAGGACTTGCAGACGAACTCCAAGATTGGGGCACTCCT	NA	circbase	NA	NA	NA	NA	NA	NA	NA	NA	NA	NA	NA	hsa_circ_0006855	chr11	62549365	62550297	+	932	429	NM_006473	TAF6L
hsa_circ_0047589	5.13365	P	7.66489	P	0.172989	5.7807	down	circRNA	TGATCCCCAGAATTACTCTATGTCTGTATATCTTGTACGGCAGCTTACATCAGCCATGTT	NA	circbase	NA	NA	NA	NA	NA	NA	NA	NA	NA	NA	NA	hsa_circ_0047589	chr18	44395274	44424802	-	29528	825	NM_004671	PIAS2
hsa_circ_0075427	3.33749	P	2.14586	A	2.28411	2.28411	up	circRNA	CTTGACCTCAAAGTAAATTTTCGCAGAAGGACTTAGAAATGCTATTCCATGGAATGAGTG	NA	circbase	NA	NA	NA	NA	NA	NA	NA	NA	NA	NA	NA	hsa_circ_0075427	chr6	553853	619543	-	65690	1699	NM_018303	EXOC2
hsa_circ_0088608	3.29641	P	4.29839	P	0.499314	2.00275	down	circRNA	GTGGACACACGACCAGTCCACCATGCCTGAAGTCAAAGACCTCTCAGAAGCCTTGCCAGA	NA	circbase	NA	NA	NA	NA	NA	NA	NA	NA	NA	NA	NA	hsa_circ_0088608	chr9	129102786	129148937	+	46151	328	NM_033446	FAM125B
hsa_circ_0029779	5.0152	P	7.09715	P	0.236196	4.23377	down	circRNA	AGATAAGGAGATATTACACCACCATATTGCCTCAGTAGAGAAACTTGCTTTGACTACTTC	NA	circbase	NA	NA	NA	NA	NA	NA	NA	NA	NA	NA	NA	hsa_circ_0029779	chr13	25839956	25842079	-	2123	450	NM_004685	MTMR6
hsa_circ_0004817	3.31036	P	1.11101	A	4.59272	4.59272	up	circRNA	GCAAAAGACAATTATTTTAATACCCTCTGAACTACAGTTCCTGAGGAAGAACTAAATCCA	NA	circbase	NA	NA	NA	NA	NA	NA	NA	NA	NA	NA	NA	hsa_circ_0004817	chr14	62211422	62212535	+	1113	236	NM_001530	HIF1A
hsa_circ_0005910	5.87427	P	3.04657	A	7.09943	7.09943	up	circRNA	TTTTGCCAAGTAATTTGCCATCTTCCATGTATGAATGGTGGCCAGTGCAGTTCAAGGGAC	NA	circbase	NA	NA	NA	NA	NA	NA	NA	NA	NA	NA	NA	hsa_circ_0005910	chr2	33411922	33447218	+	35296	675	NM_206943	LTBP1
hsa_circ_0078656	4.83762	P	3.53552	P	2.46588	2.46588	up	circRNA	TTCCCAGGGGACCACAGAGGAGGATCTCAACCTGGATGTGGAGCCCACCACAGAAGACAC	NA	circbase	NA	NA	NA	NA	NA	NA	NA	NA	NA	NA	NA	hsa_circ_0078656	chr6	166843940	167271747	-	427807	1542	NM_001006932	RPS6KA2
hsa_circ_0060924	6.75265	P	5.26812	P	2.79826	2.79826	up	circRNA	TACGCCTCAGATGATGAGCACGTTTGGGAGGATGATGGTCACTCCAGTCGAGCTGCACAA	NA	circbase	NA	NA	NA	NA	NA	NA	NA	NA	NA	NA	NA	hsa_circ_0060924	chr20	52773707	52781102	-	7395	823	NM_000782	CYP24A1
hsa_circ_0012103	6.96178	P	5.76576	P	2.29107	2.29107	up	circRNA	TCTTCCCCCGATTCAGTGGTTCTTTCCTTTGACTCCGCTGGACAAACACTAGGCTCAGAG	NA	circbase	NA	NA	NA	NA	NA	NA	NA	NA	NA	NA	NA	hsa_circ_0012103	chr1	44257772	44303983	+	46211	346	NM_174963	ST3GAL3
hsa_circ_0069278	3.81726	P	2.41702	A	2.63946	2.63946	up	circRNA	ACTATTGCAGATGCTGTGAAACAAGCTATGCAGAAGCATCTTCTTCAAGGCTGGTTACGG	NA	circbase	NA	NA	NA	NA	NA	NA	NA	NA	NA	NA	NA	hsa_circ_0069278	chr4	17818883	17832739	+	13856	1109	NM_022346	NCAPG
hsa_circ_0057197	6.52777	P	3.86645	P	6.32613	6.32613	up	circRNA	ATTTGGAGACCAGGAAGCTGACAGCTGGGAAATTATAGAAGGGCTGAAAATAGGCCAAAC	NA	circbase	NA	NA	NA	NA	NA	NA	NA	NA	NA	NA	NA	hsa_circ_0057197	chr2	179192982	179255944	+	62962	2326	NM_001201480	OSBPL6
hsa_circ_0085691	5.70153	P	4.56114	P	2.2044	2.2044	up	circRNA	TACAGCCACGTGAAGGGGCACAGGAAGTTCTCATTGATCCAGGTGCCCTCACCACCAATG	NA	circbase	NA	NA	NA	NA	NA	NA	NA	NA	NA	NA	NA	hsa_circ_0085691	chr8	141231557	141436740	-	205183	1697	NM_031466	TRAPPC9
hsa_circ_0035745	4.43027	P	7.26611	P	0.140065	7.13957	down	circRNA	GTGTATGAAGGTTTGCAGAATGGCTTCTGATTATTCGAGAACATGTGCTAGCCCAGATAG	NA	circbase	NA	NA	NA	NA	NA	NA	NA	NA	NA	NA	NA	hsa_circ_0035745	chr15	63953171	64050568	-	97397	8197	NM_003922	HERC1
hsa_circ_0001433	2.43635	A	7.15788	P	0.0379033	26.3829	down	circRNA	AATACTTCCTGAAATATCCAAGTTGGGAGCAGGCTGAGTCAAGCTCAATTGAGTGGATGG	NA	circbase	NA	NA	NA	NA	NA	NA	NA	NA	NA	NA	NA	hsa_circ_0001433	chr4	103749651	103749908	+	257	257	NM_181893	UBE2D3
hsa_circ_0068396	3.47174	P	1.89007	A	2.99315	2.99315	up	circRNA	ATCCGGAGAGACGCAGAAGAAACATGTCCTTCATTCACCAGGCTGAGCTTTCACAGTGCA	NA	circbase	NA	NA	NA	NA	NA	NA	NA	NA	NA	NA	NA	hsa_circ_0068396	chr3	185229311	185252920	-	23609	1219	NM_139248	LIPH
hsa_circ_0060656	2.35473	A	4.08849	P	0.300666	3.32595	down	circRNA	ATGGCATCATCCACCATGGCCTGAAGCTGGGCATGGAGCGTGATGCCTACGTCATGATTG	NA	circbase	NA	NA	NA	NA	NA	NA	NA	NA	NA	NA	NA	hsa_circ_0060656	chr20	47297772	47305342	-	7570	249	NM_020820	PREX1
hsa_circ_0026298	6.89494	P	13.1573	M	0.0130265	76.7667	down	circRNA	ATGGAAATGAGCTTGTTATCTCCGTGGCCTGAATTCTACGCATATTGGTGAAGATAGGTG	NA	circbase	NA	NA	NA	NA	NA	NA	NA	NA	NA	NA	NA	hsa_circ_0026298	chr12	51451814	51454207	+	2393	1161	NM_001243689	LETMD1
hsa_circ_0013388	6.82866	P	5.77858	P	2.07064	2.07064	up	circRNA	AATTGGTTAGTGGGTTCCCGTAAGTGCCTGTAACAAATGTTGCTGAAGTGCTGCTGAAAG	NA	circbase	NA	NA	NA	NA	NA	NA	NA	NA	NA	NA	NA	hsa_circ_0013388	chr1	109427896	109476957	+	49061	6698	NM_013296	GPSM2
hsa_circ_0057425	1.35571	A	3.84286	P	0.178359	5.60668	down	circRNA	TGGCCCTCCTAAGGATATGGTGAAGAAATAGCCTGCACTCAGAATGGCCAGATGTACTTA	NA	circbase	NA	NA	NA	NA	NA	NA	NA	NA	NA	NA	NA	hsa_circ_0057425	chr2	189907876	189975175	-	67299	3374	NM_000393	COL5A2
hsa_circ_0042591	6.57171	P	5.21146	P	2.5673	2.5673	up	circRNA	TGAATTAGAACTGCAGAGGTTCCTCTACAGCAAGGTACATTATTGGGCCTCATTTGCCCA	NA	circbase	NA	NA	NA	NA	NA	NA	NA	NA	NA	NA	NA	hsa_circ_0042591	chr17	26945808	26958937	-	13129	1827	NM_014680	KIAA0100
hsa_circ_0027991	1.86003	A	3.94965	P	0.234943	4.25635	down	circRNA	CATGCCCCAGTGTAAAACTAGTCTGTGTGCATACACATGCGTTATTTCTGCTTACCTCTC	NA	circbase	NA	NA	NA	NA	NA	NA	NA	NA	NA	NA	NA	hsa_circ_0027991	chr12	105589038	105627183	-	38145	1502	NM_001251905	APPL2
hsa_circ_0057775	2.96579	A	4.18953	P	0.42817	2.33552	down	circRNA	TCTTATATGTGGTGCTACGGGCCAGTTATGTAGTAACGAGTTCTGGATTATTGCTTCCTG	NA	circbase	NA	NA	NA	NA	NA	NA	NA	NA	NA	NA	NA	hsa_circ_0057775	chr2	202569176	202571745	-	2569	435	NM_020919	ALS2
hsa_circ_0088089	7.28944	P	5.63006	P	3.15881	3.15881	up	circRNA	CCTAAAACAGTTGAAGCAGTTGGAGGAAAGGCCTTGCCATGTATTGTTGATGTGAGAGAT	NA	circbase	NA	NA	NA	NA	NA	NA	NA	NA	NA	NA	NA	hsa_circ_0088089	chr9	115167903	115181238	+	13335	417	NM_032303	HSDL2
hsa_circ_0065114	12.6741	M	1.40469	A	2468.52	2468.52	up	circRNA	TGCACAGTAAAAATGGAAACTATATTGACCTAAATGGCCTTGTGATGGATGAGCACCTCG	NA	circbase	NA	NA	NA	NA	NA	NA	NA	NA	NA	NA	NA	hsa_circ_0065114	chr3	46622621	46623952	+	1331	1331	NM_003212	TDGF1
hsa_circ_0039007	4.82073	P	3.69429	A	2.18319	2.18319	up	circRNA	CTCTTCCTGAAAAATAAATATTTGCCTTTCGATCAGCCACTTTGCTCACGGGTCAGACCG	NA	circbase	NA	NA	NA	NA	NA	NA	NA	NA	NA	NA	NA	hsa_circ_0039007	chr16	30116130	30123745	-	7615	655	NM_024307	GDPD3
hsa_circ_0077580	3.75804	P	2.17206	A	3.00212	3.00212	up	circRNA	CATTCTTAAGGCTCTATAAAGAATTGGCATGGGAGATGGGTTTTGAAGAGTTCCATTTGT	NA	circbase	NA	NA	NA	NA	NA	NA	NA	NA	NA	NA	NA	hsa_circ_0077580	chr6	109586003	109589104	+	3101	3101	---	---
hsa_circ_0057432	3.57694	P	1.29374	A	4.86756	4.86756	up	circRNA	TGTTGGAGAACGTGGTGACCCTGGGAAACCTGGAGAAGCAGGAAATGCTGGAGTTCCTGG	NA	circbase	NA	NA	NA	NA	NA	NA	NA	NA	NA	NA	NA	hsa_circ_0057432	chr2	189912934	189927789	-	14855	1332	NM_000393	COL5A2
hsa_circ_0022911	3.08119	A	4.14437	P	0.478577	2.08953	down	circRNA	TTTCAGATCCGTGCTGGAAACTCGCAGGGGGACTTTTACATTAGGCCCCAGGATGCTCCC	NA	circbase	NA	NA	NA	NA	NA	NA	NA	NA	NA	NA	NA	hsa_circ_0022911	chr11	65635331	65639832	-	4501	1177	NM_016938	EFEMP2
hsa_circ_0071812	5.23473	P	3.30114	A	3.82006	3.82006	up	circRNA	TCATCTATTTGGCCACAGTGTTGGTGTGTGAGACTTGGGCTGGAGTGCCCACGTGGCTGT	NA	circbase	NA	NA	NA	NA	NA	NA	NA	NA	NA	NA	NA	hsa_circ_0071812	chr5	9190378	9437964	-	247586	1447	NM_003966	SEMA5A
hsa_circ_0085476	3.72992	P	1.53131	A	4.59038	4.59038	up	circRNA	CAAAGCGGGCCGCGGAGCTTGTGGCGCCAGAATTCGGAGCGCGGAAGAGCCAGAGCTGCG	NA	circbase	NA	NA	NA	NA	NA	NA	NA	NA	NA	NA	NA	hsa_circ_0085476	chr8	124408426	124408705	-	279	279	NM_014109	ATAD2
hsa_circ_0041562	6.3836	P	7.7069	P	0.39962	2.50238	down	circRNA	CCTCCTCAAGCTCCCAAAGCAGTTCAAGTTTGCCCCAGAGATGGACGATTACGTGGGCAC	NA	circbase	NA	NA	NA	NA	NA	NA	NA	NA	NA	NA	NA	hsa_circ_0041562	chr17	4451252	4453648	-	2396	801	NM_014520	MYBBP1A
hsa_circ_0071255	3.55636	P	2.44796	A	2.15607	2.15607	up	circRNA	TTTCAAAGTCGCACAAAGGTACCACTGAAAACCAAAAAAGAAGATTCTGGCTCAAACTCT	NA	circbase	NA	NA	NA	NA	NA	NA	NA	NA	NA	NA	NA	hsa_circ_0071255	chr4	152041432	152053535	-	12103	2265	NM_001009555	SH3D19
hsa_circ_0030419	3.456	P	2.20474	A	2.38048	2.38048	up	circRNA	TAGAAAAATTACAGGTTGATGAGGTAATGCTGACTCTGAAACAGGCCTTCAGTACGGCGG	NA	circbase	NA	NA	NA	NA	NA	NA	NA	NA	NA	NA	NA	hsa_circ_0030419	chr13	75863069	75923438	-	60369	2388	NM_014832	TBC1D4
hsa_circ_0007330	7.08199	P	8.26568	P	0.440225	2.27157	down	circRNA	TGAGTTTGCAGTTCATGATACCAGTAGTCCTTTGCTAATCAGTGGAACCTCTGCAGCTGA	NA	circbase	NA	NA	NA	NA	NA	NA	NA	NA	NA	NA	NA	hsa_circ_0007330	chr1	51926762	51930998	-	4236	252	NM_001981	EPS15
hsa_circ_0056300	3.36455	P	5.4036	P	0.243324	4.10974	down	circRNA	TCATAGCAAGAATGGACTGCTGAATTATGAAGTATTTCAGACCCAGTAGTAGAACATCAC	NA	circbase	NA	NA	NA	NA	NA	NA	NA	NA	NA	NA	NA	hsa_circ_0056300	chr2	122161946	122363756	-	201810	3018	NM_015282	CLASP1
hsa_circ_0066668	4.70948	P	6.44627	P	0.300038	3.33291	down	circRNA	GACCAAACCTGCTCCCAAAGTGCCTCAACGAACTCATCGTCCACATCCCAAACCTAAAAC	NA	circbase	NA	NA	NA	NA	NA	NA	NA	NA	NA	NA	NA	hsa_circ_0066668	chr3	100543701	100548508	-	4807	4807	NM_015429	ABI3BP
hsa_circ_0059493	3.32675	P	2.08178	A	2.37014	2.37014	up	circRNA	TTTTTTTGTGACAAGTGTCTAATGGTATAAGAAACCTCCACAGACATCACTTCTGATAGA	NA	circbase	NA	NA	NA	NA	NA	NA	NA	NA	NA	NA	NA	hsa_circ_0059493	chr20	17577342	17581690	+	4348	4348	NM_001011546	DSTN
hsa_circ_0027160	3.94623	P	1.3536	A	6.032	6.032	up	circRNA	TCTTCAGTGGCCAGAAGGGCCCCGTGGTTGGCACCAACAAATGCCGGGTGAACAATGGCG	NA	circbase	NA	NA	NA	NA	NA	NA	NA	NA	NA	NA	NA	hsa_circ_0027160	chr12	57556640	57573924	+	17284	2832	NM_002332	LRP1
hsa_circ_0045352	1.08701	A	3.55679	P	0.180519	5.53958	down	circRNA	ATTGAGAAGGAATACACTCAGAAGCTTGCCAAATCTTCACAGCAGGGAACAGTACACTGG	NA	circbase	NA	NA	NA	NA	NA	NA	NA	NA	NA	NA	NA	hsa_circ_0045352	chr17	63746779	64128881	-	382102	1987	NM_145036	CEP112
hsa_circ_0033960	3.85982	P	2.16837	A	3.22982	3.22982	up	circRNA	AATCTCTTTGAGTGTTCTGCCTCATCCAAATACAATAGGTCAAAGGCGTGGTGGCACAGT	NA	circbase	NA	NA	NA	NA	NA	NA	NA	NA	NA	NA	NA	hsa_circ_0033960	chr14	106525519	106821343	-	295824	295824	NR_033375	LINC00226
hsa_circ_0019232	5.13856	P	3.78281	P	2.5593	2.5593	up	circRNA	TTTTTTCTGCGTGCTACCAATGAAGGTGTTGAGATTGTACTCCAGTGCCTTGATGTCATG	NA	circbase	NA	NA	NA	NA	NA	NA	NA	NA	NA	NA	NA	hsa_circ_0019232	chr10	96092988	96099677	-	6689	1568	NM_022451	NOC3L
hsa_circ_0019308	3.00136	A	11.1664	M	0.00348405	287.022	down	circRNA	AGCATCAGGAAAGGAAACGGTGGACATGCTCAAGAGTCACATTAAAGAGGAACTGATGCA	NA	circbase	NA	NA	NA	NA	NA	NA	NA	NA	NA	NA	NA	hsa_circ_0019308	chr10	98383228	98405419	-	22191	550	NM_152309	PIK3AP1
hsa_circ_0072464	3.35185	P	1.24569	A	4.30543	4.30543	up	circRNA	AGTACAAGAGGTTTTAGTATTAAAGCAGTGCCATTCCAGAATGCCATCTTGAATGTAAAA	NA	circbase	NA	NA	NA	NA	NA	NA	NA	NA	NA	NA	NA	hsa_circ_0072464	chr5	53409031	53450469	-	41438	269	NM_019087	ARL15
hsa_circ_0004052	2.86748	A	4.06237	P	0.436822	2.28926	down	circRNA	TTGTCAACTTTGAGAAGCATGAGGAAGCCCAGAAGGTGGCGTGTGACGAGCATGGCTCCC	NA	circbase	NA	NA	NA	NA	NA	NA	NA	NA	NA	NA	NA	hsa_circ_0004052	chr20	43545396	43547918	+	2522	351	NM_001124756	PABPC1L
hsa_circ_0042478	2.41391	A	4.06299	P	0.318843	3.13634	down	circRNA	AGGTATGGAGGCGTACACGTCACTTCCGAGGCGGGAGGATGAAGTTGATTGACTATGGTC	NA	circbase	NA	NA	NA	NA	NA	NA	NA	NA	NA	NA	NA	hsa_circ_0042478	chr17	21030240	21092176	+	61936	816	NM_015510	DHRS7B
hsa_circ_0026859	3.90717	P	4.91784	P	0.496313	2.01486	down	circRNA	AAACATCATACTCAAACCAGCCTGAAGAAGGGGAACAAGGAACCCAACCCTATGGTACAA	NA	circbase	NA	NA	NA	NA	NA	NA	NA	NA	NA	NA	NA	hsa_circ_0026859	chr12	56527893	56538460	+	10567	2656	NM_015292	ESYT1
hsa_circ_0082387	4.79728	P	3.31261	A	2.79854	2.79854	up	circRNA	GTAACAGCTGAGCATTTTATTAATGCTTTTACGAGTTAGAAGAGTTGGGATAATTTGCCA	NA	circbase	NA	NA	NA	NA	NA	NA	NA	NA	NA	NA	NA	hsa_circ_0082387	chr7	130737183	130737314	-	131	131	NR_015431	FLJ43663
hsa_circ_0078523	3.46419	A	4.48537	P	0.492711	2.02959	down	circRNA	GCTCAAGAAGAAGGTCAGTGCACCAGATATTCTGAAACCTCTCAATCAAGAGGATCCCAA	NA	circbase	NA	NA	NA	NA	NA	NA	NA	NA	NA	NA	NA	hsa_circ_0078523	chr6	159146534	159181777	+	35243	694	NM_001242394	SYTL3
hsa_circ_0013991	5.38021	P	7.34442	P	0.25628	3.90198	down	circRNA	GTATCGAAAGGAGAATGTGGATTATATTATTCAGGAGCTCCGAAGACCCAAATACACTAT	NA	circbase	NA	NA	NA	NA	NA	NA	NA	NA	NA	NA	NA	hsa_circ_0013991	chr1	150044232	150064189	+	19957	1035	NM_007259	VPS45
hsa_circ_0015904	4.47856	P	3.20611	A	2.41572	2.41572	up	circRNA	AACTCTATCATTCCCTATCTACAGGAAGGAGCCAAGGATGGGATAAAGGCTAATCTGGTG	NA	circbase	NA	NA	NA	NA	NA	NA	NA	NA	NA	NA	NA	hsa_circ_0015904	chr1	201762919	201782386	+	19467	2019	NM_020443	NAV1
hsa_circ_0036514	6.85002	P	13.8019	M	0.00807746	123.801	down	circRNA	AAGTCATCATAACAGGCTGCACTTACCAGTGGGCTACCATGGCCGTGCCTCCTCTGTCGT	NA	circbase	NA	NA	NA	NA	NA	NA	NA	NA	NA	NA	NA	hsa_circ_0036514	chr15	80460393	80473501	+	13108	725	NM_000137	FAH
hsa_circ_0039013	4.96077	P	12.4378	M	0.00561301	178.158	down	circRNA	ATCATAATAAAATGGCTTTATTTTCTGGTAAAGCACCTGGAGGAGCCGCTGTCCCTGCAG	NA	circbase	NA	NA	NA	NA	NA	NA	NA	NA	NA	NA	NA	hsa_circ_0039013	chr16	30199045	30200397	+	1352	742	NM_001193333	CORO1A
hsa_circ_0055787	3.44007	P	6.40574	P	0.12801	7.81191	down	circRNA	ATCTGACCACACATGTATTTACTGGGCTCTGGAACGTTCATTGTCAAAGATCTGCTCCAG	NA	circbase	NA	NA	NA	NA	NA	NA	NA	NA	NA	NA	NA	hsa_circ_0055787	chr2	99152591	99172271	+	19680	1450	NM_001134224	INPP4A
hsa_circ_0090065	1.16617	A	4.14706	P	0.126667	7.8947	down	circRNA	CTCAGTTTAGCTGCTGCCATCTTAAGTAAAGTAAATCTGTCTGTGGATCCTTGTGATAAT	NA	circbase	NA	NA	NA	NA	NA	NA	NA	NA	NA	NA	NA	hsa_circ_0090065	chrX	22065167	22263526	+	198359	1960	NM_000444	PHEX
hsa_circ_0068271	2.86836	A	3.9035	P	0.487968	2.04932	down	circRNA	ATCGAGCCAGGAGATATGTTGTTACAGCTGGTGTCAGCTGAGGGCTCACACCCAGACCCA	NA	circbase	NA	NA	NA	NA	NA	NA	NA	NA	NA	NA	NA	hsa_circ_0068271	chr3	183882054	183884053	+	1999	672	NM_004423	DVL3
hsa_circ_0037045	1.49826	A	7.82108	P	0.0124923	80.0496	down	circRNA	AACATGCCGTCAGAGAGTGATTGACTGCCTGGAGGATGAGAAGGCAACCCTCACCTTGGC	NA	circbase	NA	NA	NA	NA	NA	NA	NA	NA	NA	NA	NA	hsa_circ_0037045	chr15	99653795	99666997	+	13202	196	NM_145728	SYNM
hsa_circ_0076459	4.77729	P	2.13278	A	6.25282	6.25282	up	circRNA	TTTGATGTGTTCCTCAGATACCTGTGCCAGGATTCTGGATGATGAGATCCTAGCTGAACT	NA	circbase	NA	NA	NA	NA	NA	NA	NA	NA	NA	NA	NA	hsa_circ_0076459	chr6	43014248	43017400	-	3152	919	NM_001168370	CUL7
hsa_circ_0071595	7.40237	P	12.1621	M	0.0369119	27.0915	down	circRNA	CAGTGCCCAGATTCCCGACAGTTAAGCAATGGGGAGACATTTGGCTTTGCTCCTGCTTCT	NA	circbase	NA	NA	NA	NA	NA	NA	NA	NA	NA	NA	NA	hsa_circ_0071595	chr4	187524056	187630999	-	106943	11500	NM_005245	FAT1
hsa_circ_0001482	3.5685	P	4.89844	P	0.397785	2.51392	down	circRNA	GCCAACGTAGGTAAAGAAAAGCCACAATAATCAAACAAACAAGCAACCAAAATACCCGAA	NA	circbase	NA	NA	NA	NA	NA	NA	NA	NA	NA	NA	NA	hsa_circ_0001482	chr5	49963938	49964083	-	145	145	NM_001178056	PARP8
hsa_circ_0065242	7.0338	P	12.1169	M	0.0295003	33.8979	down	circRNA	CCCCAGCCAGCTAGAACAACAGAGGCAGCAGTTGCTTACTGAACGCCAAAACTTCCACAT	NA	circbase	NA	NA	NA	NA	NA	NA	NA	NA	NA	NA	NA	hsa_circ_0065242	chr3	47651555	47651817	-	262	262	NM_003074	SMARCC1
hsa_circ_0035201	3.37109	P	2.20418	A	2.2453	2.2453	up	circRNA	CTCACCACAGAACTACAAGCAGCTGTCGAAGAGATACTGCCAAGCCTTAAAAAAGATGAT	NA	circbase	NA	NA	NA	NA	NA	NA	NA	NA	NA	NA	NA	hsa_circ_0035201	chr15	50489696	50497560	+	7864	494	NM_003645	SLC27A2
hsa_circ_0024416	1.81917	A	4.4792	P	0.158216	6.32046	down	circRNA	TTTTTTGCAAGCCCAGCAACCACTGGGAATAGAAGACAAGGATGACAGCCAGTCCAGCCA	NA	circbase	NA	NA	NA	NA	NA	NA	NA	NA	NA	NA	NA	hsa_circ_0024416	chr11	117251329	117283982	+	32653	4164	NM_014956	CEP164
hsa_circ_0064637	7.41161	P	1.97213	A	43.3957	43.3957	up	circRNA	ATATAAACCATCCCAAACTTACAACAAGAGCAAGACCCAACAAACCTATACATCTCAAAT	NA	circbase	NA	NA	NA	NA	NA	NA	NA	NA	NA	NA	NA	hsa_circ_0064637	chr3	29781210	30032809	+	251599	1008	NM_001177712	RBMS3
hsa_circ_0039271	4.23074	P	2.85739	A	2.5907	2.5907	up	circRNA	TCAACGTAACGTGAGCATGAGGTTTTCCAATCAGGCGAATTGATGATGACAAGGGAAGGA	NA	circbase	NA	NA	NA	NA	NA	NA	NA	NA	NA	NA	NA	hsa_circ_0039271	chr16	47536901	47644831	+	107930	1153	NM_001031835	PHKB
hsa_circ_0034611	4.85299	P	3.25164	A	3.03427	3.03427	up	circRNA	ATCTGTACCATTACCTTCCACCATTCAGAATCACGTTGGGAACACTAGCTTGTCTGAGTG	NA	circbase	NA	NA	NA	NA	NA	NA	NA	NA	NA	NA	NA	hsa_circ_0034611	chr15	40944202	40951659	+	7457	522	NM_170589	CASC5
hsa_circ_0067706	5.4702	P	3.83887	P	3.09798	3.09798	up	circRNA	CTGAGGGCCAATGCTCCTGCCAGCATTTGTCTTCATTGGGCTGGAACAGGATGACTGCTG	NA	circbase	NA	NA	NA	NA	NA	NA	NA	NA	NA	NA	NA	hsa_circ_0067706	chr3	149093229	149093556	-	327	236	NM_014220	TM4SF1
hsa_circ_0017191	3.98256	P	2.48337	A	2.82683	2.82683	up	circRNA	TTATGTCTTCATGATCAGAAAGGGATTGTTTCCATTGCCACCCTAACCGTGCTGGCCTAT	NA	circbase	NA	NA	NA	NA	NA	NA	NA	NA	NA	NA	NA	hsa_circ_0017191	chr1	241761047	241767881	-	6834	572	NM_014322	OPN3
hsa_circ_0070422	6.82064	P	5.81102	P	2.01338	2.01338	up	circRNA	AGAGTTATGGATAACCACCTGCCTCAAAGATAATCTGCTCAAAAGACTTCCATTTCATTC	NA	circbase	NA	NA	NA	NA	NA	NA	NA	NA	NA	NA	NA	hsa_circ_0070422	chr4	89396991	89410487	+	13496	741	NM_016323	HERC5
hsa_circ_0024136	1.09916	A	3.47804	P	0.192259	5.20132	down	circRNA	CGTTGTCTATTTAAGGACCACGTTATGTGGTACAAATAGGTGACAAAATTATTGACTACA	NA	circbase	NA	NA	NA	NA	NA	NA	NA	NA	NA	NA	NA	hsa_circ_0024136	chr11	103124013	103130706	+	6693	653	NM_001080463	DYNC2H1
hsa_circ_0061327	3.86981	P	2.86019	A	2.01339	2.01339	up	circRNA	CTCCGAAAATGACTGATCCTTTGAAATACTCCAGCCATGACTAAAAGAGAAGCAGAGGAG	NA	circbase	NA	NA	NA	NA	NA	NA	NA	NA	NA	NA	NA	hsa_circ_0061327	chr21	27113883	27130515	+	16632	774	NM_002040	GABPA
hsa_circ_0030429	4.83604	P	1.21467	A	12.3067	12.3067	up	circRNA	TCTTTGAAAGAGTTCAGGTTGATGAGGTAATGCTGACTCTGAAACAGGCCTTCAGTACGG	NA	circbase	NA	NA	NA	NA	NA	NA	NA	NA	NA	NA	NA	hsa_circ_0030429	chr13	75915631	75923438	-	7807	225	NM_014832	TBC1D4
hsa_circ_0053645	4.68046	P	3.51857	P	2.23749	2.23749	up	circRNA	CTTTTTTCCATGCTTCAAGTCCATCATGTTCAGGAAATGGAAAGGTCAGTAGTTGCACAG	NA	circbase	NA	NA	NA	NA	NA	NA	NA	NA	NA	NA	NA	hsa_circ_0053645	chr2	32678875	32712868	+	33993	3350	NM_016252	BIRC6
hsa_circ_0047545	1.15036	A	7.8166	M	0.00984606	101.563	down	circRNA	GTTCAAGAGACCATTGACCAGGTTGGAATGACTTGGCATTTGGCTGTTTATGTCCGAGAT	NA	circbase	NA	NA	NA	NA	NA	NA	NA	NA	NA	NA	NA	hsa_circ_0047545	chr18	43508834	43514932	-	6098	454	NM_020964	EPG5
hsa_circ_0023972	2.70607	A	3.75193	P	0.484355	2.0646	down	circRNA	AAGTTCCTTTTAAGACTCACCAAGGGCAAGAGAGGGCTGCTCACAATTTATATGGCCAAC	NA	circbase	NA	NA	NA	NA	NA	NA	NA	NA	NA	NA	NA	hsa_circ_0023972	chr11	86802403	87030419	+	228016	882	NM_022918	TMEM135
hsa_circ_0070435	5.74827	P	3.46278	A	4.87528	4.87528	up	circRNA	CATAGTAAAAAAAGGGGAAAGATCCTGATGTGACATCTTGACAGTTGATCCTTTAATAAA	NA	circbase	NA	NA	NA	NA	NA	NA	NA	NA	NA	NA	NA	hsa_circ_0070435	chr4	89859238	89930229	-	70991	18260	NM_014883	FAM13A
hsa_circ_0088565	8.02346	P	9.49492	P	0.360617	2.77302	down	circRNA	TTTGAAGAGCTCAACATGCGTCGGCGTGTTCAAGAACGGCCGCGTGGAGATCATCGCCAA	NA	circbase	NA	NA	NA	NA	NA	NA	NA	NA	NA	NA	NA	hsa_circ_0088565	chr9	128001219	128003186	-	1967	874	NM_005347	HSPA5
hsa_circ_0016737	3.8498	P	1.92097	A	3.80745	3.80745	up	circRNA	TCCTCTTGTTGTATAGAGCACCAAGACTCACAGCATTCTTTCTTGGCATTTTTGAATACG	NA	circbase	NA	NA	NA	NA	NA	NA	NA	NA	NA	NA	NA	hsa_circ_0016737	chr1	227216357	227257554	-	41197	1500	NM_003607	CDC42BPA
hsa_circ_0034936	6.18392	P	3.43383	P	6.72756	6.72756	up	circRNA	TTTTAGATATCGAGGATACCCAGAGCTTAAAGGAGACCTGACAGATGCCAAAACAAAGGA	NA	circbase	NA	NA	NA	NA	NA	NA	NA	NA	NA	NA	NA	hsa_circ_0034936	chr15	43427709	43461875	+	34166	1089	NM_024956	TMEM62
hsa_circ_0043158	8.22694	P	6.68165	P	2.91863	2.91863	up	circRNA	ATCCTGCCAAAGGGCTCCCTGGTCCTAGCTGGACTGCTGCACCTTGGCAATATCCAGTTT	NA	circbase	NA	NA	NA	NA	NA	NA	NA	NA	NA	NA	NA	hsa_circ_0043158	chr17	34858936	34867294	-	8358	1186	NM_001163735	MYO19
hsa_circ_0059293	4.41571	P	3.22416	A	2.28398	2.28398	up	circRNA	ATCTCAGGCGGGTGAGTTGCAGGATGTGAGTTTGAATCTATGGAATGTCTACAGCAAGAT	NA	circbase	NA	NA	NA	NA	NA	NA	NA	NA	NA	NA	NA	hsa_circ_0059293	chr20	3329171	3340240	-	11069	177	NM_001009984	C20orf194
hsa_circ_0035322	2.67352	A	3.80698	P	0.45582	2.19385	down	circRNA	TACCCTTTGACATGTCTTCAAACTGGAACAAGAAGAATACATGAAGGAAGATATACCTTG	NA	circbase	NA	NA	NA	NA	NA	NA	NA	NA	NA	NA	NA	hsa_circ_0035322	chr15	52539113	52545654	-	6541	584	NM_018728	MYO5C
hsa_circ_0087810	3.23191	A	4.56056	P	0.39814	2.51168	down	circRNA	TCCTCCACAAACTTGAAGCTTCAAGATTTCCTGGTGGACAATGAAACCTTCTCTGGGTTC	NA	circbase	NA	NA	NA	NA	NA	NA	NA	NA	NA	NA	NA	hsa_circ_0087810	chr9	107568521	107624081	-	55560	4043	NM_005502	ABCA1
hsa_circ_0069286	3.68018	P	1.79715	A	3.68848	3.68848	up	circRNA	AATGTAGCCGAGGTTCAAAAACGAGAATTTGTCTGCAGTGCAGAGGAGGGTGGAGAGGGC	NA	circbase	NA	NA	NA	NA	NA	NA	NA	NA	NA	NA	NA	hsa_circ_0069286	chr4	20255234	20490605	+	235371	979	NM_004787	SLIT2
hsa_circ_0031539	3.74172	P	4.99063	P	0.420764	2.37663	down	circRNA	AGCATGTCAGATGACTTTTTGGTACTGCATCTTGCTGACTTAATTCGCATGGCTTTTATG	NA	circbase	NA	NA	NA	NA	NA	NA	NA	NA	NA	NA	NA	hsa_circ_0031539	chr14	31787429	31790886	-	3457	251	NM_015473	HEATR5A
hsa_circ_0060509	3.33562	A	4.52005	P	0.439998	2.27274	down	circRNA	GCACTTCGAGGTAGAACTGCATGTCCACCTAGACGGATCCATCAAGCCTGAAACCATCTT	NA	circbase	NA	NA	NA	NA	NA	NA	NA	NA	NA	NA	NA	hsa_circ_0060509	chr20	43251469	43264929	-	13460	747	NM_000022	ADA
hsa_circ_0041621	5.23234	P	6.27691	P	0.484791	2.06275	down	circRNA	TTGTTTCTTTGTGGACTAAGACCGGAAGTCCTTCATCTCAAGCATCCAATGCTGAAAGCG	NA	circbase	NA	NA	NA	NA	NA	NA	NA	NA	NA	NA	NA	hsa_circ_0041621	chr17	4843781	4848517	+	4736	1682	NM_015528	RNF167
hsa_circ_0006367	3.48372	P	1.40885	A	4.21307	4.21307	up	circRNA	TGATGCACTGAACATATGCAGTAATGTCACCTCAAAAGAGAGTTAAGAACGTCCAGGCAC	NA	circbase	NA	NA	NA	NA	NA	NA	NA	NA	NA	NA	NA	hsa_circ_0006367	chrX	100356046	100364987	+	8941	604	NM_006733	CENPI
hsa_circ_0054965	4.76165	P	1.25773	A	11.3445	11.3445	up	circRNA	TTTCCACTGGAAATTTCTTCTAGAAGAGCTTTGCGTCTTAAACGCCCATACCGCAGACAG	NA	circbase	NA	NA	NA	NA	NA	NA	NA	NA	NA	NA	NA	hsa_circ_0054965	chr2	65215578	65251000	+	35422	3734	NM_001193493	SLC1A4
hsa_circ_0070554	4.28599	P	3.08818	A	2.29391	2.29391	up	circRNA	ACATATTGAGGACCTAGAAAAACAAGAGGAGCTAAAAATTGTTCACATGCATCTGAAGGA	NA	circbase	NA	NA	NA	NA	NA	NA	NA	NA	NA	NA	NA	hsa_circ_0070554	chr4	104054851	104064563	-	9712	1575	NM_001813	CENPE
hsa_circ_0027619	4.02305	P	6.12583	P	0.232809	4.29537	down	circRNA	ATTTAGTCAAGAAATCAAACCCCAAAGCCATTATAACCATGGATATGGTGAACCTCTTGG	NA	circbase	NA	NA	NA	NA	NA	NA	NA	NA	NA	NA	NA	hsa_circ_0027619	chr12	77191213	77199219	+	8006	227	NM_015336	ZDHHC17
hsa_circ_0064674	3.24445	A	4.56752	P	0.399682	2.50199	down	circRNA	TGATGATGCAGACACTGTTGAACTCTGTGGTGCGCTTAAGGTTGCCATGTCAAATCTTAG	NA	circbase	NA	NA	NA	NA	NA	NA	NA	NA	NA	NA	NA	hsa_circ_0064674	chr3	32180078	32188226	+	8148	393	NM_015141	GPD1L
hsa_circ_0067376	5.87091	P	4.55941	P	2.482	2.482	up	circRNA	TACCTCACAGGGTGATTGTGACAAAACTTATGGATCAGAATTTGTCTACAGTGATCATGC	NA	circbase	NA	NA	NA	NA	NA	NA	NA	NA	NA	NA	NA	hsa_circ_0067376	chr3	132226080	132249941	+	23861	1627	NM_015268	DNAJC13
hsa_circ_0013262	4.03662	P	7.02849	P	0.125706	7.95505	down	circRNA	AAAGCGAACTACATATGGAGGAGTGTCTGGACATTGTGACAAATGTTTCCCCCAGAATCA	NA	circbase	NA	NA	NA	NA	NA	NA	NA	NA	NA	NA	NA	hsa_circ_0013262	chr1	97770814	97915779	-	144965	559	NM_000110	DPYD
hsa_circ_0013892	3.06692	A	4.20342	P	0.454862	2.19847	down	circRNA	ATAATAAAGGTTGTGAATGTTCGGCATTTGCGGCCGGCGCCAGGGTGGAGAGTTGTGCGC	NA	circbase	NA	NA	NA	NA	NA	NA	NA	NA	NA	NA	NA	hsa_circ_0013892	chr1	145575987	145586546	+	10559	2902	NM_006099	PIAS3
hsa_circ_0078268	5.56048	P	7.85571	P	0.203735	4.90833	down	circRNA	TGAGTCATTAAAGTATATCCATTCCCAGAAGCTGGTCTGAACATCACTCACATTTGCCTC	NA	circbase	NA	NA	NA	NA	NA	NA	NA	NA	NA	NA	NA	hsa_circ_0078268	chr6	151198908	151220136	+	21228	558	NM_001242769	MTHFD1L
hsa_circ_0062273	1.23758	A	4.18948	P	0.129238	7.73767	down	circRNA	GGAACTGAAGCTGGAAGCCCATCACCGACTATGTGGACCAGCAGTTTGAGCAGTACTTCC	NA	circbase	NA	NA	NA	NA	NA	NA	NA	NA	NA	NA	NA	hsa_circ_0062273	chr22	19707842	19708392	+	550	355	NR_037611	SEPT5-GP1BB
hsa_circ_0038393	3.796	P	2.57848	A	2.32547	2.32547	up	circRNA	TTAAGCATGGCCCAAAAAAGGGCCTTTACCTTCTAATGCAAAAGCCGCCATCAACCTTCA	NA	circbase	NA	NA	NA	NA	NA	NA	NA	NA	NA	NA	NA	hsa_circ_0038393	chr16	20833083	20839859	+	6776	683	NM_001199053	LOC81691
hsa_circ_0001282	3.77757	P	1.87643	A	3.73511	3.73511	up	circRNA	CATTCCTCAGAAGGTGTTGGAGTTCTTGGTTGTAAGCAACAAAAAGTCAATCTAGGTAAG	NA	circbase	NA	NA	NA	NA	NA	NA	NA	NA	NA	NA	NA	hsa_circ_0001282	chr3	37291188	37315092	+	23904	1853	NM_001172713	GOLGA4
hsa_circ_0037880	7.10782	P	17.0672	M	0.00100443	995.589	down	circRNA	AATGAAACAGATGAATGGACCAGGTAGTTTGTTTGCTTCAGAGAATTTCCTGGGAATTTC	NA	circbase	NA	NA	NA	NA	NA	NA	NA	NA	NA	NA	NA	hsa_circ_0037880	chr16	11857333	11862357	-	5024	829	NM_014153	ZC3H7A
hsa_circ_0050791	3.935	P	1.20512	A	6.63397	6.63397	up	circRNA	AACAGCTGCACACTGACCTGCAGAAGCGCGAAGCGGCTTGGAAGTGGGCAGCCTGGAAGT	NA	circbase	NA	NA	NA	NA	NA	NA	NA	NA	NA	NA	NA	hsa_circ_0050791	chr19	38397867	38694848	+	296981	5711	NM_015073	SIPA1L3
hsa_circ_0030190	7.50368	P	9.8551	P	0.195954	5.10324	down	circRNA	AGAGAGAGAGACACAGTGCCGTAACTGGCTGAAGACTGGCAACTGCCTCTATGGAAACAC	NA	circbase	NA	NA	NA	NA	NA	NA	NA	NA	NA	NA	NA	hsa_circ_0030190	chr13	46553947	46619199	-	65252	1795	NM_015070	ZC3H13
hsa_circ_0055600	5.22357	P	4.20143	P	2.03093	2.03093	up	circRNA	TACTTTTCAGTGTCTTCTGAGAAACCATCAGGCTTGAAGTGTCTTCAGAGCAACCACCAG	NA	circbase	NA	NA	NA	NA	NA	NA	NA	NA	NA	NA	NA	hsa_circ_0055600	chr2	96557579	96568829	-	11250	11250	---	---
hsa_circ_0015751	3.39544	P	1.87331	A	2.87215	2.87215	up	circRNA	GACATCATCTCATTTGTGGGATCCAACATCTGGAACGAATAGGAAAGAAGCTGAATCTCT	NA	circbase	NA	NA	NA	NA	NA	NA	NA	NA	NA	NA	NA	hsa_circ_0015751	chr1	196392179	196398887	-	6708	547	NM_198503	KCNT2
hsa_circ_0045059	2.7432	A	3.76351	P	0.49301	2.02836	down	circRNA	TGGACAGCAGTTTGTAGGGGCCTGATAAAAAATGGAGAACGACAAGATGAAGAAAGTCTT	NA	circbase	NA	NA	NA	NA	NA	NA	NA	NA	NA	NA	NA	hsa_circ_0045059	chr17	59988880	59989431	-	551	305	NR_026641	INTS2
hsa_circ_0052199	2.74379	A	6.18074	P	0.0923365	10.83	down	circRNA	GAGTAAATAGCTCTGTGGAGATTGTCACTAGTGCCACAGGGCCTGTGCAGCTGGACAGGG	NA	circbase	NA	NA	NA	NA	NA	NA	NA	NA	NA	NA	NA	hsa_circ_0052199	chr19	55715149	55718567	-	3418	835	NM_002842	PTPRH
hsa_circ_0008962	5.30698	P	6.38728	P	0.472929	2.11448	down	circRNA	GACCATATGTAGCTTGTCAAAATTCCCAAAAATGATCCCCTCAATGAAGTTCATAACTTT	NA	circbase	NA	NA	NA	NA	NA	NA	NA	NA	NA	NA	NA	hsa_circ_0008962	chr5	95249474	95255249	-	5775	286	NM_012081	ELL2
hsa_circ_0038079	8.2093	M	6.15882	P	4.14243	4.14243	up	circRNA	ATTTCACAAGGACTGGAATGTCACGTGGAATACCAGCAACCCCGACTTCACCAAGTGCTT	NA	circbase	NA	NA	NA	NA	NA	NA	NA	NA	NA	NA	NA	hsa_circ_0038079	chr16	16101672	16205439	+	103767	3031	NM_004996	ABCC1
hsa_circ_0008928	4.24544	P	12.9955	P	0.00232255	430.562	down	circRNA	TCTTTGCAAGAGTGGCATTCAACCGCACACAGGTTTGATGATTCCTGTCTTTTGTGTCGT	NA	circbase	NA	NA	NA	NA	NA	NA	NA	NA	NA	NA	NA	hsa_circ_0008928	chr2	200213423	200298237	-	84814	1004	NM_001172509	SATB2
hsa_circ_0074928	7.53657	P	1.1204	A	85.4008	85.4008	up	circRNA	CGCTGCTCAGGCAACTGGACAACAACCACATCAGCTGCATTGAAGATGGAGCCTTCCGAG	NA	circbase	NA	NA	NA	NA	NA	NA	NA	NA	NA	NA	NA	hsa_circ_0074928	chr5	168199785	168271660	-	71875	974	NM_003062	SLIT3
hsa_circ_0069352	5.35278	P	4.35041	P	2.00329	2.00329	up	circRNA	GTTTGTGCAGGCTTAATATTCTCGTCCTTGGAGGAAGCTCTGGATTTATTGAGCTTTATG	NA	circbase	NA	NA	NA	NA	NA	NA	NA	NA	NA	NA	NA	hsa_circ_0069352	chr4	25391757	25395513	+	3756	361	NM_013367	ANAPC4
hsa_circ_0021550	1.12823	A	3.49488	P	0.193895	5.15743	down	circRNA	ATACGGTGCACCTTGAAATGCACAGCGGTATTGATGAGTAGATCCTTGGATTCAGAGGTT	NA	circbase	NA	NA	NA	NA	NA	NA	NA	NA	NA	NA	NA	hsa_circ_0021550	chr11	30516842	30602041	-	85199	657	NM_001145399	MPPED2
hsa_circ_0063283	6.7594	P	8.22132	P	0.36301	2.75475	down	circRNA	GAAGAACACCAAGCTGGACATGCAGTTCATCAAACAGGCCTCCATCTCCAGGTCCCTCTC	NA	circbase	NA	NA	NA	NA	NA	NA	NA	NA	NA	NA	NA	hsa_circ_0063283	chr22	38494417	38506676	-	12259	492	NM_025045	BAIAP2L2
hsa_circ_0064670	3.55882	P	1.90371	A	3.14949	3.14949	up	circRNA	ATCAGACCTCTTGAGAAGCAGGGACCCATGGAGTCCAGGTGTGTTGAGGCTCCTGGAACA	NA	circbase	NA	NA	NA	NA	NA	NA	NA	NA	NA	NA	NA	hsa_circ_0064670	chr3	31710133	31712475	-	2342	370	NM_017784	OSBPL10
hsa_circ_0046677	8.46618	P	7.45881	P	2.01024	2.01024	up	circRNA	TATTTACCTGAATCACATCGAGCCACTGAAAATTCAGATCTTCCTCTGATGGCGCTGCCT	NA	circbase	NA	NA	NA	NA	NA	NA	NA	NA	NA	NA	NA	hsa_circ_0046677	chr18	670691	671451	+	760	248	NM_001071	TYMS
hsa_circ_0061500	4.21524	P	1.10321	A	8.64597	8.64597	up	circRNA	CTCACTATACATTGCTGTATACAATCATGAGATTACACAGATGAATCTTGCACTTTCAAG	NA	circbase	NA	NA	NA	NA	NA	NA	NA	NA	NA	NA	NA	hsa_circ_0061500	chr21	34617255	34617379	+	124	124	NM_207585	IFNAR2
hsa_circ_0018533	6.26293	P	5.02024	P	2.36638	2.36638	up	circRNA	AGACAATATCGTATGACAGCAGTTATCTGTACTTACCCTCTTGACATGGTTAGGGTCCGC	NA	circbase	NA	NA	NA	NA	NA	NA	NA	NA	NA	NA	NA	hsa_circ_0018533	chr10	70248223	70253327	-	5104	352	NM_152707	SLC25A16
hsa_circ_0037366	12.6599	P	14.0885	P	0.371507	2.69174	down	circRNA	TGTTGCTGAAATATAAAGCCCTGCAACCTGGCAGCCGCCCTCGGCGTCCTCTGTAGCGGG	NA	circbase	NA	NA	NA	NA	NA	NA	NA	NA	NA	NA	NA	hsa_circ_0037366	chr16	2009516	2011976	+	2460	697	NM_004548	NDUFB10
hsa_circ_0077659	4.2189	P	5.27311	P	0.481558	2.07659	down	circRNA	AGAAGGAAAAGTCAGAAGACATGTCTTCATCTACATGGCATCTTTCCTTACCTCTATGTG	NA	circbase	NA	NA	NA	NA	NA	NA	NA	NA	NA	NA	NA	hsa_circ_0077659	chr6	111726672	111737675	-	11003	426	NM_002912	REV3L
hsa_circ_0015404	4.09677	P	2.93561	A	2.23636	2.23636	up	circRNA	CAGAGAAGATTTAGTAGGTATCTATTTGTCAGATTTAACATACATCGATTCAGCATACCC	NA	circbase	NA	NA	NA	NA	NA	NA	NA	NA	NA	NA	NA	hsa_circ_0015404	chr1	178846632	178852668	+	6036	297	NM_152663	RALGPS2
hsa_circ_0078150	8.45309	P	3.3656	A	34.0005	34.0005	up	circRNA	ATACTACATTCGCTTAAATTTTGCAGAGAAAGACTGTTCGCCATGGATTTCCCTATCAAC	NA	circbase	NA	NA	NA	NA	NA	NA	NA	NA	NA	NA	NA	hsa_circ_0078150	chr6	147527106	147560406	+	33300	281	NM_001127715	STXBP5
hsa_circ_0025148	4.07562	P	2.77529	A	2.46286	2.46286	up	circRNA	TGGAACCACTCAATAATTGAAGAAGAATTTGTCAGCTTTTCAGGCTGCCTTTCGAGCTCA	NA	circbase	NA	NA	NA	NA	NA	NA	NA	NA	NA	NA	NA	hsa_circ_0025148	chr12	6618882	6620418	+	1536	460	NM_014865	NCAPD2
[truncated: 292 more rows]

## Sheet: DE_lncRNA
Fold-Change cut-off: 2.0
compare: FaduDDP4_VS_Fadu_fc2
foldchange:the ratio ( not logarithm) of normalized intensities between two conditions ; Formula : foldchange=average(power(2,signal(CASE)))/average(power(2,signal(CONTROL))).
[truncated: 2,391 more rows]

## Sheet: DE_mRNA
Fold-Change cut-off: 2.0
[truncated: 750 more rows]

[truncated: 1 more sheets: ALL_miRNA]
